# Supplementary material
Source: publisher figshare collection journal article supplement (https://gsajournals.figshare.com/ndownloader/files/23623265)
Supplement: Supplementary file 1 [file 23623265]

## Sheet: Table S2 Overview
Table S2: Wolbachia read counts per gene from each study
Each subsequent tab provides the read counts for each CDS for each study.

## Sheet: Darby et al., 2012
darby_woo_adultmale_a	darby_woo_adultmale_b	darby_woo_adultfemale_a	darby_woo_adultfemale_b
cds0	0	1.81	3.05	4.16
cds10	14	40.4	67.32	39.03
cds100	98.87	209.1	272.18	120.5
cds101	31.83	87.14	111.24	50.52
cds102	157.21	496.67	798.19	471.3
cds103	140.59	867.9	2281.62	926.93
cds104	4.47	8.95	29.47	11.11
cds105	9.87	33.54	90.31	52.69
cds106	34.08	105.26	153.53	85.31
cds107	29.82	122.52	332.01	159.66
cds108	16.84	48.23	89.7	42.7
cds109	15.36	42.89	70.18	41.67
cds11	7	14.48	33.63	22.64
cds110	224.19	1030.03	1602.69	633.57
cds111	34.62	101.93	140.82	96.66
cds113	221.19	431.85	1010.09	871.77
cds114	50.53	250.26	397.56	258.27
cds115	46.99	129.75	255.05	124.64
cds116	73.76	328.22	491.27	313.72
cds117	61.8	381.16	350.15	202.97
cds118	8.4	19.67	35.72	23.74
cds119	108.69	185.2	652.26	435.3
cds12	5.75	8	54.65	21.71
cds120	45.86	45.67	78.77	71.62
cds121	10.07	17.98	33.21	23.89
cds122	17.5	41.73	103.56	77.21
cds123	6.5	36.31	36.88	25.21
cds124	5.74	24.39	39.32	32.04
cds125	23.42	136.73	208.65	134.38
cds126	0	1.26	6.91	2.27
cds129	32.85	70.21	129.56	81.01
cds13	3.94	16.45	36.77	19.22
cds130	107.41	180.37	307.87	246.56
cds131	18.76	10.5	46.73	13.9
cds133	178.38	421.5	791.3	415.8
cds135	20.5	32.55	75.31	43.65
cds136	1.83	6.48	29.19	8.29
cds137	2.6	11.66	17.3	18.1
cds138	53.81	120.57	138.02	91.69
cds139	24.25	30.24	94.77	74.21
cds14	31.37	107.66	227.71	136.32
cds140	7.5	21.9	42.74	21.13
cds141	7.79	20.38	38.77	18.26
cds142	0.94	1.88	9.21	3.91
cds143	42.43	125.97	169.9	114.78
cds144	18.69	46.6	62.94	32.21
cds145	9.47	27.27	68.04	47.83
cds146	35.2	150.6	258.49	153.85
cds147	10.55	39.79	89.38	42.58
cds148	48.44	193.08	408.08	167.69
cds149	87.59	273.74	470.14	278.64
cds15	59.17	288.51	514.86	338.81
cds150	40.98	131.11	210.58	171.29
cds151	12	34.93	80.78	27.85
cds152	16	114.32	157.76	92.7
cds153	32.75	141.34	208.54	87.67
cds154	9.35	25.75	46.38	28.31
cds155	62.29	218.94	333	189.83
cds157	2	0	7.47	4.16
cds158	9.21	26.93	22.54	11.76
cds159	5.34	12.4	17.9	5.22
cds16	3.05	19.49	11.84	16.31
cds160	28.61	105.24	164.39	102.79
cds161	120.35	222.73	328.19	203.43
cds162	14.15	33.32	101.16	61.77
cds163	5.34	15.31	50.34	28.75
cds164	34.27	88.96	233.75	124.64
cds165	54.35	170.17	364.89	170.91
cds166	57.82	255.97	412.46	209.86
cds169	16.5	35.56	50.23	28.46
cds17	26.26	46.04	121.11	72.78
cds172	4.48	4.21	11.53	3.73
cds173	105.58	322.24	818.15	512.18
cds174	53.94	180.88	365.04	187.43
cds175	4.19	17.4	48.85	19.19
cds176	17.15	63.78	101.3	47.28
cds177	42.17	58.73	147.44	94.15
cds178	37.45	77.69	194.03	135.81
cds18	11.33	24.99	45.38	18.63
cds180	1.97	1.82	5.75	2.86
cds181	58.96	255.1	566.72	286.55
cds182	24.39	72.56	146.25	80.35
cds183	101.33	336.4	303.51	204.54
cds184	70.96	426.09	250.53	180.13
cds185	124.99	385.33	624.58	306.24
cds186	0.5	0.5	14.29	2.46
cds187	22	76.2	116.58	47.64
cds188	60.9	161.74	147.51	100.3
cds189	23.51	59.33	101.39	43.13
cds19	14.61	65.5	107.6	46.28
cds190	16.67	54.51	105.65	55.12
cds191	94.92	282.07	636.31	311.55
cds192	13.79	55.57	183.91	87.15
cds194	38.58	177.18	149.65	130.14
cds196	14.89	36.71	109.2	44.82
cds197	10.67	50.17	104.13	46.06
cds198	13	27.67	77.39	30.76
cds199	212.64	386.18	925.65	403.93
cds2	65.97	309.86	394.27	229.94
cds200	44	112.92	213.53	159.66
cds201	4	25.39	40.54	24.54
cds202	67.14	168.7	314.86	189.01
cds203	18.96	63.64	179.75	94.95
cds204	12.88	41.65	122.07	48.94
cds205	2.43	3.86	23.73	9.07
cds206	41	92.19	158.96	65.21
cds207	53.79	147.68	239.98	162.82
cds208	34.45	152.05	288.44	197.53
cds209	7	18.42	59.16	30.05
cds21	38.39	81.92	204.64	112.18
cds210	7.61	35.61	73.29	38.73
cds211	48.87	480.51	280.34	114.46
cds212	49.19	142.08	245.39	118.29
cds213	14.71	48.14	160.27	52.5
cds214	31.5	77.53	174.83	93.01
cds215	5.89	17.5	53.03	39.02
cds216	67.99	132.06	245.27	151.19
cds217	6.96	29.4	56.1	31.02
cds218	44.46	116.07	371.92	185.44
cds219	0.5	0.5	13.58	1
cds22	53.59	137.14	287.73	148.53
cds220	10.5	16.68	56.36	19.28
cds221	15.51	39.54	97.51	42.41
cds223	147.09	143.49	389.06	217.38
cds224	53.59	274.51	452.96	189.66
cds225	29.38	59.78	151.8	65.14
cds226	26.23	48.14	103.05	52.18
cds227	31.65	73.94	155.63	99.15
cds228	7.6	20	52.9	22.52
cds229	11.47	43.15	97.05	47.89
cds23	131.66	407.91	666.95	325.22
cds230	72.05	338.55	688.66	363.34
cds231	71.21	204.15	304	218.17
cds232	7.48	27.58	77.58	34.62
cds233	79.51	298.98	556.65	273.56
cds234	0	0	5.52	1
cds236	7.07	30.73	53.86	32.08
cds237	32.45	135.24	183.33	107.15
cds238	4	16.47	37.81	37.35
cds239	58.86	166.64	246.48	150.67
cds24	47.13	91.74	127.84	75.03
cds240	6.5	14.11	30.48	17.11
cds241	5.67	19.75	49.79	28.92
cds242	10.79	51.03	72.72	35.39
cds244	8.11	20.59	46.33	22.77
cds245	3.5	8.54	23.7	20.19
cds246	7.64	21.42	76.82	29.93
cds248	31.77	105.4	163.76	101.4
cds249	8	42.74	84.3	43.04
cds25	0.66	0.2	2.43	0.69
cds250	22.77	60.16	130.86	65.99
cds251	9.92	16.15	39.86	32.68
cds252	24.54	76.88	165.55	93.07
cds253	7.48	16	48.28	27.81
cds254	94.32	144.79	212.99	141.49
cds255	0.5	0.27	2.05	2.28
cds256	50.49	126.53	326.1	122.71
cds257	63.01	166.95	344.28	182.11
cds258	6.89	5.65	24.48	27.55
cds259	50.56	84.88	231.8	174.11
cds26	49.47	201.96	342.33	159.25
cds260	62	57.31	177.71	245.48
cds261	10	16.5	52.45	28.28
cds262	48.96	148.1	227.96	147.96
cds263	25.62	64.97	101.38	66.75
cds266	8.61	12.15	32.23	17.53
cds267	19.95	52.46	114.21	60.99
cds268	47.44	163	309.42	195.63
cds269	14.34	76.42	135.79	73.18
cds27	58.88	274.55	661.66	217.1
cds270	50.89	89.96	271.35	175.4
cds271	11.89	22.98	70.06	29.28
cds272	20.5	73.02	99.55	83
cds273	31.27	59.18	136.29	102.92
cds274	43.49	117.2	228.57	109.43
cds275	126.82	215.78	376.94	265.53
cds276	22.03	56.94	118.85	62.17
cds277	55.84	226.39	341.66	196.59
cds278	2.5	4.3	9.86	9.78
cds279	1	2.16	9.22	7.52
cds28	18.22	98.52	311.19	104.02
cds280	12.79	28.5	57.72	32.66
cds281	4.38	11	26.77	22.61
cds282	61.55	177.9	270.7	149.49
cds283	97.97	174.36	393.61	205.62
cds284	79.63	308.66	336.05	157.54
cds285	8.56	11.5	18	15.58
cds286	1.85	1	16.11	9.44
cds287	1	4.82	25.76	10.69
cds288	4.2	14.47	29.75	18.92
cds289	34.86	74.18	171.69	71.99
cds29	31.53	102.5	137	72.85
cds290	64.33	194.74	368.89	184.46
cds291	37.57	117.75	227.74	151.73
cds292	5.81	9.38	43.96	19.26
cds293	16.46	17.5	48.48	45.19
cds295	6.45	12.17	42.06	30.71
cds296	7.03	26.15	76.79	29.4
cds297	8.5	30.08	60.68	30
cds298	7.03	12.27	26.95	27.18
cds3	56.89	247.48	462.77	266.75
cds30	31.38	60.85	207.56	109.84
cds300	60.24	334.24	543.34	362.92
cds301	36.71	49.09	168.7	136.73
cds302	24.86	30.24	76.42	42.58
cds303	11.5	16	30.36	12
cds306	1	17.5	36.5	28.5
cds307	0	0	0	0
cds308	0	4	6	3.5
cds309	0	0	1	0
cds31	10.48	32.82	67.42	59.49
cds310	0	0	1.5	0
cds311	16.35	41.3	112.69	72.7
cds313	9.89	12.35	37.58	13.57
cds314	9.16	38.58	111.04	86.92
cds315	46.35	141.46	194.92	99.26
cds316	20	88.81	109.88	53.56
cds317	9.56	27.29	100.43	43.5
cds318	7.73	22.86	50.11	12.84
cds319	26.25	85.97	143.29	74.12
cds32	9.29	27.52	74.4	55.27
cds320	45.99	234.76	287.82	176.45
cds321	8.97	12.83	63.82	36.29
cds322	62.97	158.37	162.26	95.11
cds323	26.64	79.13	166.34	66.47
cds324	20.47	136.7	226.65	103.5
cds325	42.74	207.39	229.79	115.15
cds327	0.5	1.52	4.27	1.5
cds328	67.31	242.5	315.96	197.53
cds329	148.32	615.78	539.52	321.58
cds33	26.13	127.67	176.77	95.43
cds330	19.4	31.97	182.05	89.78
cds331	27.16	127.2	165.35	92.34
cds332	22.48	57.51	160.46	75.36
cds333	505.84	1493.46	1858.24	1082.92
cds334	54.06	186.71	262.29	169.59
cds335	192.53	629.17	1966.02	897.67
cds336	99.47	211.8	643.39	322.19
cds337	6.45	9.36	17.54	24.61
cds338	7	30.51	87.96	36.34
cds339	10.01	38.29	63.48	64.05
cds34	17.32	28.72	64.5	34.2
cds340	39.78	151.34	264.34	177.85
cds341	21.65	57.44	83.28	34.2
cds342	488.62	2240.05	4485.86	2277.39
cds343	115.96	585.64	868.57	415.78
cds345	14.61	18.98	70.97	31.9
cds346	19.81	83.68	111.57	74.84
cds347	9.06	11.38	46.15	20.5
cds348	23.16	38.48	65.92	44.74
cds349	12.85	24.76	48.44	27.34
cds35	62.14	96.72	156.31	115.31
cds350	8.71	28.75	54.39	25.04
cds351	45.44	83.6	159	60.47
cds352	10	26.58	86.42	50.97
cds354	6.16	10.29	26.43	25.81
cds355	44.71	176.79	207.18	122.05
cds356	20.89	78.98	118.39	77.43
cds357	38.5	174.52	270.33	147.07
cds358	139.22	420.06	583.25	273.02
cds359	47.5	198.73	464.96	227.96
cds36	24.02	33.81	95.97	76.96
cds360	7.41	24.92	34.5	24.8
cds361	4.5	9.03	31.09	21.46
cds362	4.5	13	53.39	17.9
cds363	76	172.61	289.69	158.04
cds364	32.35	123.56	244.95	162.03
cds365	69.13	182.81	421.37	187.58
cds366	36.19	103.93	195.1	124.17
cds367	45.28	207.08	234.11	124.17
cds368	53.54	165.99	201.25	117.36
cds369	2	15.35	25.72	11.83
cds37	18.34	46.6	141.56	89.68
cds370	1.5	3.5	5	2.5
cds371	0	0	1	0
cds372	0	0	1	0
cds373	1	0	4	1
cds374	0	0	0.5	0
cds375	0.5	0.5	1	0.5
cds376	27.5	69	86.98	43
cds377	27.5	99.17	172.47	72.34
cds378	23.17	56.72	174.69	75.5
cds379	26.53	107.24	116.28	47.32
cds380	16.15	56.24	165.45	62.64
cds381	40.76	75.5	192.34	85
cds382	191.05	433.03	591.27	391.99
cds383	7.5	36.3	109.54	53.24
cds384	35.67	151.84	316.87	173.83
cds385	194.64	462.49	571.5	327.77
cds386	36	96.01	198.41	107.28
cds387	56	124.26	232.27	140.3
cds388	3	10.24	24.83	6.96
cds389	2.5	8.4	17.44	9.3
cds39	10.76	42.89	115.32	52.59
cds390	46.81	174.27	335.89	184.68
cds391	26.5	141.23	317.56	186.91
cds392	32.35	106.7	242.91	108.34
cds393	13	56.45	122.43	60.28
cds394	12.58	45.99	130.74	66.02
cds395	0	0	0.5	0.5
cds396	0.5	1	16.67	3
cds397	0	3	11.14	0.5
cds398	0	0	0.5	0
cds399	5.93	15	30.45	15.93
cds40	43.6	109.02	219.57	100.85
cds400	171.72	42.86	172.86	52.98
cds402	137.16	299.73	400.63	273.29
cds403	60.16	238.63	615.57	262.32
cds404	105.32	371.49	471.01	257.24
cds405	175.6	786.02	1708.84	836.76
cds406	31.41	132.2	329.31	170.68
cds407	21.67	44.92	159.45	45.58
cds408	3.22	9.95	16.14	11.09
cds409	1.78	6.26	17.78	6.8
cds41	49.85	142.6	298.98	199.97
cds410	1.29	3.03	7.21	3.19
cds411	82.74	341.71	410.84	239.89
cds412	74.55	142.67	299.41	158.05
cds413	27.46	89.95	224.91	95.87
cds414	30.5	158.59	379.9	159.09
cds415	23	149.84	266.78	125.38
cds416	8.41	18.89	49.68	19.68
cds417	21.84	50.1	179.93	66.97
cds418	5	15.29	44.57	20.3
cds42	30.25	59.85	322.74	227.73
cds420	150.31	328.24	511.48	348.77
cds421	26.44	42.35	137.47	68.81
cds422	34.92	33.78	99.47	60.9
cds423	15.18	40.21	90.99	56.7
cds424	12.58	34.99	64.52	29.89
cds425	8.02	20.67	48.39	15
cds426	31.42	92.53	164.4	96.41
cds427	35.94	116.69	166.32	116.14
cds428	30.48	174.47	354.29	232.66
cds43	8.07	24.93	41.27	41.03
cds430	20.5	107.53	232.16	119.5
cds431	22.32	55.43	89.54	36.04
cds433	9.56	46.24	102.35	49.57
cds434	23.27	81.22	168.5	94.83
cds435	19.14	47.85	88.18	56.98
cds436	17.24	33.49	100.53	71.36
cds437	52.28	193.98	266.51	138.67
cds438	15.04	48.2	99.19	41.96
cds439	4.3	28.22	57.26	33.67
cds44	8.45	22.35	34.72	17
cds440	95.9	180.68	322.2	177.93
cds441	56.05	167.59	245.8	152.94
cds442	59.63	209.44	355.25	298.9
cds443	13.61	40.78	67.39	30.03
cds444	11.34	19.46	77.76	28.22
cds445	36.98	111.3	243.58	74.53
cds446	0	0	0	0
cds448	13.5	56.47	124.5	55.5
cds449	0.5	0.5	1	0
cds45	68.55	150.95	222.76	137.3
cds451	0	0	0.32	0
cds452	78.57	281.71	606.01	294.97
cds453	535.1	2097.15	2990.42	1458.2
cds454	17.88	67.18	94.2	61.32
cds455	22.36	59.56	112.8	44.96
cds456	18.99	33.96	109.07	60.99
cds457	1.4	10.05	19.18	10.02
cds458	63.87	142.19	344.48	184.66
cds459	59.06	84.63	144.48	75.53
cds46	26.5	90.96	83.59	51.8
cds460	12.02	43.33	82.06	49.66
cds461	20.88	46.9	96.55	65.97
cds462	13.33	20	93.5	76
cds463	23.51	48.75	150.75	75.02
cds465	8.43	19.14	49.87	27.8
cds466	25.31	70.76	93.69	38.21
cds467	13.7	23.91	68.27	38.25
cds468	13.55	25.76	53.53	26.86
cds469	11.5	20.9	68.29	18.4
cds47	3.54	14.71	42.38	15.5
cds470	32.92	92.44	207.2	84.76
cds471	22.79	91	134.24	50.64
cds472	24.13	89.13	261.39	108.13
cds473	13.49	54.52	175.63	81.87
cds474	5	12.61	67.94	24.18
cds475	19.81	59.4	177.09	67.9
cds476	9.47	28.5	83	56
cds477	65.48	168.18	325.19	190.63
cds478	25	59.5	236.36	133.5
cds479	26.03	102.25	191.07	82.5
cds48	12.7	13.82	42.76	30.5
cds480	38.26	133.61	165.58	116.99
cds481	28.9	56.03	164.69	85.8
cds482	76.14	159.65	344.3	150.67
cds483	345.05	469.87	1299.7	732.37
cds484	244.44	864.92	907.55	567.41
cds485	29.43	57.88	157.49	70.27
cds486	144.03	296.43	960.04	462.43
cds487	2	7.45	25.7	11.52
cds488	12.68	42.5	82.24	47.77
cds489	31.53	83.95	196.06	149.22
cds490	44.88	62.44	166.94	86.13
cds493	31.26	87.75	148.35	105.14
cds494	9.96	26.5	66.31	31.5
cds496	0	0	0	0
cds497	0	0.5	0.5	0
cds498	0	0	1	0
cds499	0	0	0.5	0
cds5	32.22	158.56	429.84	203.94
cds50	15.84	31.28	77.14	90.71
cds500	0.12	0	1.26	1
cds501	0.35	0	0.71	0
cds502	0.31	0.09	1.32	0.56
cds503	0.6	3.86	6.43	4.85
cds504	0	0	1.76	1
cds505	0	0	0.71	2
cds506	4.38	22.58	24.93	21.5
cds507	13.65	91.15	138.39	85.95
cds508	180.98	610	767.09	516.25
cds509	54.56	128.33	134.41	113
cds51	31.17	125.68	390.61	225.1
cds510	16.96	37.22	147.24	88.16
cds511	517.6	3097.62	1668.91	1116.26
cds512	12.5	15	29.21	18.85
cds513	104.2	261.5	367.68	210.2
cds514	17.6	18.35	84.94	29.12
cds515	23.4	47.41	114.33	57.83
cds516	126.31	355.43	792.75	284.57
cds517	26.28	77.96	177.49	87.78
cds518	47.58	125.86	207.42	110.27
cds519	11	32.23	112.58	44.07
cds52	8	44.33	85.07	33.48
cds520	100.15	156.94	401.31	257.39
cds521	43.64	97.45	186.28	108.3
cds522	45.24	129.22	184.21	146.59
cds523	39.18	174.91	175.91	81.85
cds524	14.31	19.71	57.13	31.99
cds525	55.78	147.6	281.58	192.02
cds526	11.46	41.22	108.14	47.42
cds527	17.5	69.15	138.66	66.57
cds528	28.8	72.56	132.97	62.58
cds529	2.66	13.22	18.84	13.36
cds53	17.44	82.7	163.12	78.29
cds530	6.5	12.71	34.14	18.61
cds531	104.97	698.42	1054.45	498.19
cds532	4	7	21.68	8.22
cds533	15.17	39.86	130.9	69.06
cds534	53.58	194.36	263.02	172.84
cds536	12.84	14.92	44.08	25.33
cds537	0	3.5	2	2
cds538	0	3	7	8.5
cds539	3.89	1.5	24.4	10.5
cds54	5.17	13.64	37.39	20.94
cds540	24	66.82	190.58	90.53
cds541	7.12	25.35	42.5	27.85
cds542	2.09	5.93	12.08	9.76
cds543	81.15	299.43	662.58	364.06
cds544	117.42	377.56	1023.32	750.46
cds545	127.58	462.19	752.81	340.8
cds546	40.51	139.33	209.09	96.54
cds547	106.23	346.95	361.12	217.31
cds549	12.94	43.88	106.18	41.98
cds55	19.45	62.24	154.43	88.39
cds550	183.17	241.68	407.49	292.02
cds551	49.96	58.47	174.81	74.25
cds555	18	65.99	123.86	61.38
cds556	18.7	65.04	63.82	32.75
cds557	19.5	39.27	64.34	33.81
cds558	11.97	48.98	112.5	63.84
cds559	43.95	105.13	90.56	46.47
cds56	17.32	46.2	115.79	47.22
cds560	14.41	28	95.88	47
cds562	18	90.19	193.12	85.63
cds563	80.63	251.64	359.44	215.33
cds564	10.92	36.15	150.35	90.39
cds565	8.58	19.32	47.36	21.07
cds566	20	56.89	100.09	54.17
cds567	4.4	9.61	25.09	25.36
cds568	35.5	77.36	167.55	97.74
cds569	26.71	45.38	82.8	40.93
cds57	52.65	143.02	311.29	179.54
cds570	36.7	128.57	193.84	137.08
cds571	23	118.04	207.52	115.3
cds572	7	15.05	38.39	17
cds573	259.61	364.07	795.89	548.6
cds575	7.69	15.03	43.61	21.5
cds576	19.86	58.71	175.32	121.74
cds578	50.62	95.91	252.13	113.93
cds579	16.4	22.72	60.4	52.85
cds58	2.57	11.89	43.97	25.64
cds580	22.12	32.66	91.06	36.06
cds581	47.45	69.86	116.51	72.13
cds582	24.58	52.04	106.6	65.81
cds583	10.68	38.35	53.6	37.11
cds584	44.59	201.22	254.01	149.58
cds585	4.55	26.29	16.43	10.51
cds586	64.91	116.53	141.38	74.69
cds587	23.36	59.76	147.86	66.71
cds588	48.27	247.96	292.6	165.37
cds589	5.43	13.97	55.35	36.9
cds59	187.32	836.79	1246.46	804.32
cds591	58.17	79.44	147.93	91.91
cds592	14.96	52.22	77.34	42.19
cds593	50.53	198.15	164.82	98.15
cds594	56.86	351.78	1207.64	596.27
cds595	27.5	81.5	123.04	58.42
cds596	226.76	864.83	1805.51	801.1
cds597	159.27	421.02	740.45	401.2
cds598	15.75	37.19	161.59	123.69
cds599	10.83	19.5	72.68	35.47
cds6	43.87	155.83	194.71	136.85
cds60	2.17	2.08	3.99	2.26
cds600	1.5	2.1	4.7	4.43
cds601	35.78	104.39	160	112.38
cds602	15.46	84.95	152.41	84.55
cds603	14.96	78.22	88.94	42.72
cds604	91.37	257.2	426.35	281.78
cds605	40.15	137.32	202.02	111.65
cds606	9.5	28	74.77	43.31
cds607	19.4	81.4	74.34	40.41
cds608	27.31	43	65.87	52.05
cds609	0	0	0	0
cds61	0	0	0	0
cds610	0	0	0	0
cds611	0	0	0	0
cds612	0	0	0	0
cds613	0	0	0	0
cds614	18	55.76	65.61	51.11
cds615	12.07	21.4	92.56	37.19
cds616	6.28	35.33	55.25	39.75
cds617	79.47	106.88	283.48	188.2
cds618	30.43	81.15	164.69	97.26
cds619	11.18	30.17	48.6	55.53
cds62	0	0	0	0
cds620	10.41	15.5	38.04	21.38
cds622	5.5	6.74	34.13	11.06
cds623	18.92	39.09	125	59.46
cds624	156.3	699.27	1359.67	631.38
cds625	68.4	369.14	339.99	135.46
cds626	0	0	1	0.47
cds627	0	1.5	1.5	1
cds628	1	4.41	16.83	8.97
cds629	9.5	24.4	57.6	32.2
cds63	0	0	0	0
cds630	4.35	34	58.27	38.01
cds631	89.47	225.46	580.67	280.91
cds632	0	0.81	2.96	0.19
cds633	101.38	512.8	517.23	336.27
cds634	22.87	59.74	92.27	48.03
cds636	28.56	91.53	122.04	82.12
cds637	12.46	24.32	106.69	75.29
cds638	5.94	7.66	33.15	27.31
cds639	63.13	231.89	338.93	262.18
cds64	0	0	0	0
cds640	3.5	9.93	27.58	14.98
cds641	324.08	1822.62	1634.29	939.33
cds642	24.68	52.55	70.73	44.68
cds643	11.5	37.73	64.94	32.48
cds645	35	54.07	117.13	79.98
cds646	9.5	22.83	62.35	23.89
cds647	9.08	52.54	21.75	28.67
cds648	95.7	309.45	441.34	261.75
cds649	72.14	465.88	655.93	376.23
cds65	97.11	411.6	586.49	285.6
cds650	37.27	114.19	145.42	124.58
cds652	11.34	16.28	103.28	31.46
cds653	17.61	38.05	66.05	38.35
cds654	16.52	30.4	141.08	60.78
cds655	9.98	45.45	89.22	44.43
cds656	19.13	65.89	128.86	76.82
cds657	19.58	78.63	110.79	76.6
cds658	31.01	174.93	215.37	117.38
cds659	106.58	475.08	781.21	478.14
cds66	1.91	9.6	18.73	11.9
cds660	80.8	326.04	304.57	170.09
cds661	21.73	108.31	168.79	86.12
cds662	13.63	28.63	60.04	23.84
cds663	3.01	5.98	17.95	10.37
cds664	30	106	119.84	85.5
cds665	37.47	97.26	358.83	181.35
cds666	16.5	48.66	115.82	61.5
cds667	103.21	195.5	349.69	249.97
cds668	67	119.45	400.69	224.15
cds669	0	0	0	0
cds670	0	0	0	0
cds671	5.53	15.88	39.29	25.02
cds672	18.53	36.04	116.92	58.04
cds673	23.99	55.65	123.65	52.63
cds674	304.74	460.11	1124.13	859.2
cds675	8	15.54	47.83	36.54
cds676	23.85	86.5	185.73	101.51
cds677	17.02	118.28	216.07	83.15
cds678	132.64	585.59	679.26	410.48
cds679	46.51	189.03	153.75	68.94
cds680	112.98	278.78	383.4	237.09
cds681	11.14	29.68	105.75	58.31
cds683	24.51	92.31	274.36	160.29
cds684	58.15	257.8	353.14	169.39
cds685	25.44	64.81	148.28	70.65
cds686	54.12	215.19	411.2	217.64
cds687	77.35	423.54	418.64	228.88
cds688	40.8	188.7	265.01	111.54
cds689	21.62	69.61	186.18	111.6
cds69	79.59	249.99	359.37	195.51
cds690	21.15	66.49	143.83	52.81
cds691	54.67	221.65	208.96	114.71
cds692	12.57	65.91	183.95	138.47
cds693	9.53	29.62	111.98	60.45
cds694	33.72	131.03	243.26	123.63
cds695	55.14	322.01	629.87	268.5
cds696	26.4	90.31	230.29	104.31
cds697	17.6	54.08	109.74	54.93
cds698	77.6	268.09	428.06	184.58
cds699	17.28	49.99	67.72	37.39
cds7	20.25	92.18	206	115.41
cds70	17	32.5	64.11	37.66
cds700	22.08	53.86	128.97	57.84
cds701	56.1	175.42	354.34	187.51
cds702	34.81	106.72	227.59	93.44
cds703	341.25	2010.08	4539.37	2660.43
cds704	25.21	69.84	136.77	80.57
cds705	20.98	49.11	116.66	59.44
cds706	31.13	101.36	187.65	85.41
cds707	28.69	90.27	125.23	103.28
cds708	58.69	155.74	181.42	153.79
cds71	96.52	289.71	505.67	200.58
cds714	1.04	0.98	3.92	2.68
cds715	37.11	101.43	231.55	182.18
cds716	247.58	412.02	710.79	392.57
cds717	108.25	269.67	506.35	229.22
cds72	12.84	59.19	111.13	68.66
cds73	44.53	114.18	153.04	92.38
cds74	44	191.01	347.31	193.92
cds75	55.86	135.63	236.51	100.84
cds76	217.26	683.27	643.75	402.9
cds77	21.11	104.73	125.45	76.1
cds78	17.35	129.41	215.42	147.11
cds79	17.11	33.94	118.27	99.82
cds8	20.07	80.92	206.01	83.03
cds80	0	3	5.28	3.25
cds82	129.47	415.41	632.57	306.78
cds83	57.06	136.51	223.75	116.65
cds84	21	134	156.61	94
cds85	2.31	6.08	14.52	11.89
cds86	31.01	94.48	149.59	92.38
cds87	34.57	91.35	159.76	81.35
cds88	18.42	44.29	171.02	66.5
cds89	41	71.43	167.59	79.55
cds90	32.83	82.33	218.15	101.23
cds91	3.48	8.07	30.34	23.31
cds92	7.46	21.93	83.23	44.03
cds93	23.1	87.53	204.89	83.7
cds94	14.22	33.49	89.68	55.51
cds95	9.65	16.75	88.29	40.9
cds96	3.5	5.82	32.79	11
cds98	8.83	28.78	81.18	40.2

## Sheet: Luck et al., 2014
luck_wdi_L3_a	luck_wdi_L4_a	luck_wdi_adultmale_a	luck_wdi_adultfemale_a	luck_wdi_MF_a
fig|82301.12.peg.1	3.5	0	10	25	36.7
fig|82301.12.peg.10	0	0.24	3.5	24.64	19.23
fig|82301.12.peg.100	0	0	2.36	1.5	2.44
fig|82301.12.peg.101	0	0	0	0	10.61
fig|82301.12.peg.102	0.5	0	7.24	20.56	32.49
fig|82301.12.peg.103	0	1.5	5.18	33.36	31.92
fig|82301.12.peg.104	0	0	1	5.08	27.14
fig|82301.12.peg.105	0.35	0	2.51	10.08	32.33
fig|82301.12.peg.106	0.09	0	2.31	13.97	15.6
fig|82301.12.peg.107	0.5	0	4	15.74	29.99
fig|82301.12.peg.108	1.68	0.81	10.48	27.38	32.89
fig|82301.12.peg.109	3.73	2.42	12.96	33.78	19.64
fig|82301.12.peg.11	0.14	2.5	2.16	13.16	39.37
fig|82301.12.peg.110	0.96	1	5.45	11.06	14.93
fig|82301.12.peg.111	0.5	1	6.14	22.48	22.93
fig|82301.12.peg.112	0	6.5	5	21	62.17
fig|82301.12.peg.113	0.5	0	0	0.63	5.03
fig|82301.12.peg.114	0.5	2.06	3.99	7.87	31.83
fig|82301.12.peg.115	0.5	0	1.5	4.59	14
fig|82301.12.peg.116	1.5	2	13.5	33	77
fig|82301.12.peg.117	2.14	4	15.5	44.16	46.87
fig|82301.12.peg.118	1	1	8.93	16.64	34.86
fig|82301.12.peg.119	1.5	16.85	6.5	13.18	73.71
fig|82301.12.peg.12	0	0	3.67	12.28	46.6
fig|82301.12.peg.120	1.5	0	8	22.88	84.76
fig|82301.12.peg.121	1	1	3.14	12.13	42.44
fig|82301.12.peg.122	1.41	0	22.39	34.3	4.24
fig|82301.12.peg.123	1.5	3.77	18.28	59.95	20
fig|82301.12.peg.124	5.5	9.87	34.64	100.32	27.79
fig|82301.12.peg.125	2	0	1.86	10.98	18.15
fig|82301.12.peg.126	0	0	2.5	5.5	9.37
fig|82301.12.peg.127	0	3	3.83	15.27	52.92
fig|82301.12.peg.128	0.22	0.96	1.33	1.78	10.09
fig|82301.12.peg.129	2	0	8.89	23.82	61.89
fig|82301.12.peg.13	2	4	7.97	28.4	48.03
fig|82301.12.peg.130	1.5	1	2.5	18.68	86.49
fig|82301.12.peg.131	0	5	1.5	9.96	41.39
fig|82301.12.peg.132	0	0	0	0.37	0.78
fig|82301.12.peg.133	4	3.5	39.71	97.98	179.99
fig|82301.12.peg.134	1	0	3.99	14.94	11.34
fig|82301.12.peg.135	0	0	0.04	1.23	9.66
fig|82301.12.peg.136	0.5	1	6	19.69	96.45
fig|82301.12.peg.137	0	0	3.5	8.09	14.21
fig|82301.12.peg.138	0.5	3	3.83	9.75	24.81
fig|82301.12.peg.139	1	2.66	7.49	17.21	59.89
fig|82301.12.peg.14	1	3.5	3.06	19.52	78.54
fig|82301.12.peg.140	2.83	0	8.65	32.45	54
fig|82301.12.peg.141	2	1.5	12.03	41.08	64.04
fig|82301.12.peg.142	0	0	0	2.87	3.06
fig|82301.12.peg.143	0.45	0	0.5	0.52	5.18
fig|82301.12.peg.144	2	3	10	28.5	73.49
fig|82301.12.peg.145	1	0	1.89	9.46	17.47
fig|82301.12.peg.146	0	1	6.5	19.01	72.44
fig|82301.12.peg.147	1	5	8	20.67	32.53
fig|82301.12.peg.148	3	0.6	3.87	17.18	29.5
fig|82301.12.peg.149	0.5	2.9	5.13	15.55	36.34
fig|82301.12.peg.15	0.5	1.74	2	14.21	29.47
fig|82301.12.peg.150	1.17	0	7.39	18.98	27.68
fig|82301.12.peg.151	0	0	0.5	3.96	28.72
fig|82301.12.peg.152	1.04	0	7.44	10.78	29.11
fig|82301.12.peg.153	0.42	0	7.52	29.7	53.2
fig|82301.12.peg.154	6.5	0	9.16	20.79	36.96
fig|82301.12.peg.155	0.5	5.5	1.42	10.42	13.08
fig|82301.12.peg.156	0	0	0.99	0.8	7.59
fig|82301.12.peg.157	0	2	3.38	20.5	72.5
fig|82301.12.peg.158	0	0.61	1.49	7.16	14.55
fig|82301.12.peg.159	0.57	0.29	1.61	10.9	41.04
fig|82301.12.peg.16	0	0	0.48	2.61	5.04
fig|82301.12.peg.160	0	0	0	1.8	4.89
fig|82301.12.peg.161	0	0	0.5	0	2.77
fig|82301.12.peg.162	0	0	3.18	9.92	62.42
fig|82301.12.peg.163	0.5	11	5.46	18.05	45.49
fig|82301.12.peg.164	0	3.5	10.1	28.82	62.57
fig|82301.12.peg.165	1	4.82	6.8	20.52	54.58
fig|82301.12.peg.166	0	0	1.26	3.96	4.14
fig|82301.12.peg.167	0	0	1.5	7.87	33
fig|82301.12.peg.168	0.5	1.5	2	11.38	25.2
fig|82301.12.peg.169	0.83	7.5	3.17	14.11	41.03
fig|82301.12.peg.17	0	0	3.53	6.73	14.5
fig|82301.12.peg.170	0	0	0.5	2.09	7.53
fig|82301.12.peg.171	0	0	0.35	1.91	2.63
fig|82301.12.peg.172	0	0	2.5	6.58	14.5
fig|82301.12.peg.173	0	2	1.5	4.9	4.67
fig|82301.12.peg.174	0.36	0	1.42	5.91	1.5
fig|82301.12.peg.175	0	0	2.12	5.39	21.77
fig|82301.12.peg.176	0.5	6.5	9	30.38	45.31
fig|82301.12.peg.177	1.5	0	9	15.14	16.71
fig|82301.12.peg.178	0	4.55	8.47	33.5	99.81
fig|82301.12.peg.179	0	0	1.27	8.67	12.52
fig|82301.12.peg.18	2.5	0.5	11.19	50.64	54.72
fig|82301.12.peg.180	0.27	0	3.14	7.84	10.89
fig|82301.12.peg.181	1.09	1	10.5	28.35	23.24
fig|82301.12.peg.182	0.22	1.5	3.94	7.02	13.03
fig|82301.12.peg.183	2	1.5	9.77	33.19	13.35
fig|82301.12.peg.184	1	9.5	7.03	50.43	63.7
fig|82301.12.peg.185	0	0	4.63	9.65	20.43
fig|82301.12.peg.186	2.5	5.34	22.89	69.63	81.36
fig|82301.12.peg.187	0	0.5	1.62	0.68	13.53
fig|82301.12.peg.188	0	3	7.73	22.15	35.02
fig|82301.12.peg.189	0.5	4.9	3.67	8.08	26.29
fig|82301.12.peg.19	1	1	5.27	11.58	40.93
fig|82301.12.peg.190	2.46	4	10.24	33.89	50.81
fig|82301.12.peg.191	0	0	0	0.6	6.3
fig|82301.12.peg.192	0	1.5	1.73	13.13	8.77
fig|82301.12.peg.193	0	0	0	0.81	6.56
fig|82301.12.peg.194	0	0	0	2.62	11.38
fig|82301.12.peg.195	3	4	14.5	42.12	50.87
fig|82301.12.peg.196	1	0	2.38	10.47	16.74
fig|82301.12.peg.197	0	0	4	14.5	55.91
fig|82301.12.peg.198	0	1	2.85	14.98	41.23
fig|82301.12.peg.199	0	4.5	1.5	17.98	28.02
fig|82301.12.peg.2	0	0	4	14.2	15.86
fig|82301.12.peg.20	1.87	0	2.5	17.33	8.76
fig|82301.12.peg.200	0	0	1.5	4.53	1.75
fig|82301.12.peg.201	0	0	0	0.53	8.85
fig|82301.12.peg.202	0	0	0	3.22	21.31
fig|82301.12.peg.203	0.5	3	6.5	15.29	48.1
fig|82301.12.peg.204	0	0.25	0.5	1.76	9.8
fig|82301.12.peg.205	0	0	0	0.5	6.61
fig|82301.12.peg.206	2.5	1.5	9.22	15.25	47.2
fig|82301.12.peg.207	0	0.37	2.38	2.55	6.41
fig|82301.12.peg.208	0.44	0	1.68	1.46	6.31
fig|82301.12.peg.209	0	0.5	10.97	20.37	62.96
fig|82301.12.peg.21	0.5	0	8	19.77	27.18
fig|82301.12.peg.210	0	0	0	0.52	6.97
fig|82301.12.peg.211	1.61	8.5	18.5	62.69	89.71
fig|82301.12.peg.212	0.39	0	0	1.49	1.29
fig|82301.12.peg.213	0	0	1	1.17	10.71
fig|82301.12.peg.214	0	0	0	1.5	4.41
fig|82301.12.peg.215	0	0	3.5	6.49	28.99
fig|82301.12.peg.216	0	0	0	5.28	16.85
fig|82301.12.peg.217	0	0.45	0.38	7.04	10.74
fig|82301.12.peg.218	0	2.5	3.42	6.25	23.67
fig|82301.12.peg.219	0	1	3	10.22	36.36
fig|82301.12.peg.22	0	0	0.27	0.07	1.3
fig|82301.12.peg.220	0	0	1.95	1.07	3.64
fig|82301.12.peg.221	0	1.5	3.57	11.2	18.68
fig|82301.12.peg.222	2	2	4.57	12.69	29.53
fig|82301.12.peg.223	1	1	9.56	22.69	20.07
fig|82301.12.peg.224	1	4.19	6.5	25.4	54.2
fig|82301.12.peg.225	1	1.5	17	54.85	93.24
fig|82301.12.peg.226	1.47	0.34	3.4	11.82	15.81
fig|82301.12.peg.227	2	0.06	3.5	13.08	27.59
fig|82301.12.peg.228	0	1	0.76	0.15	4.42
fig|82301.12.peg.229	2.5	1.5	11.5	40.56	56.51
fig|82301.12.peg.23	0	0	0.04	1.2	0.46
fig|82301.12.peg.230	1	0	8	17.73	38.13
fig|82301.12.peg.231	0	0	0.6	1.91	5.47
fig|82301.12.peg.232	1	3.24	9.5	38.31	76.33
fig|82301.12.peg.233	0	0	0.89	2.49	83.02
fig|82301.12.peg.234	0	0	1.07	2.59	22.47
fig|82301.12.peg.235	0	0	0	0.28	0.21
fig|82301.12.peg.236	0.5	0	1.06	5.58	15.53
fig|82301.12.peg.237	1	1.5	3.33	8.4	28.06
fig|82301.12.peg.238	0.5	0	6.46	6.66	34
fig|82301.12.peg.239	7.5	3	18.53	56.91	32.85
fig|82301.12.peg.24	0.39	1	0.24	1.45	1.48
fig|82301.12.peg.240	1.5	3	2.56	4.73	9.12
fig|82301.12.peg.241	0	0	0	2.14	1.46
fig|82301.12.peg.242	0	0	0	2.32	8.53
fig|82301.12.peg.243	1.5	2.48	5	19.8	54.78
fig|82301.12.peg.244	0	1.5	1.86	4.23	14.51
fig|82301.12.peg.245	0.5	5.5	1.25	7.99	11.83
fig|82301.12.peg.246	0.5	2.5	2.5	5.16	18.33
fig|82301.12.peg.247	0	2.5	2	7.72	28.26
fig|82301.12.peg.248	2	5.5	6	25.08	56.52
fig|82301.12.peg.249	0	0.78	5.37	15.62	36.61
fig|82301.12.peg.25	0.5	0.5	6.2	18.46	51.62
fig|82301.12.peg.250	0	1.16	4.07	12.16	21.71
fig|82301.12.peg.251	1	0	4.26	15.64	23.76
fig|82301.12.peg.252	0.5	0	3.5	8	70.07
fig|82301.12.peg.253	2	0	4.57	10.73	26.54
fig|82301.12.peg.254	1	0	1.49	4	16.69
fig|82301.12.peg.255	0	2.64	1	4.79	13.55
fig|82301.12.peg.256	0	0	3.5	7.86	20.38
fig|82301.12.peg.257	0	0.5	4	12.49	14.57
fig|82301.12.peg.258	0.5	1.5	2.82	8.75	22.65
fig|82301.12.peg.259	0	2	1.09	5.82	16.71
fig|82301.12.peg.26	0	0	0	1.94	22.33
fig|82301.12.peg.260	1	0	3.71	18.99	22.88
fig|82301.12.peg.261	0	1	6.18	20.19	59.14
fig|82301.12.peg.262	0.5	0.5	5.06	8.97	29.27
fig|82301.12.peg.263	0	0	1.89	7	20.25
fig|82301.12.peg.264	2	4.45	10.32	33.18	44.07
fig|82301.12.peg.265	0.5	1.54	0.5	6.92	12.07
fig|82301.12.peg.266	0.5	3	4.21	15.97	22.41
fig|82301.12.peg.267	1	0	10.02	20.68	33.12
fig|82301.12.peg.268	0	0.18	0.69	10.64	8.91
fig|82301.12.peg.269	0	1.5	4.5	18.38	29.89
fig|82301.12.peg.27	0	0	8.55	21.6	30.95
fig|82301.12.peg.270	0.43	0	3.37	14.78	61.09
fig|82301.12.peg.271	0.95	3.5	3.2	17.13	26.31
fig|82301.12.peg.272	0.5	1.5	6.72	20.52	5.87
fig|82301.12.peg.273	0	0	3.54	13.54	6.13
fig|82301.12.peg.274	0.5	4	1.53	7.47	28.82
fig|82301.12.peg.275	0	1.55	0.36	0.54	8.59
fig|82301.12.peg.276	0	0	0	1.2	3.05
fig|82301.12.peg.277	0	0	0.16	1.29	10.19
fig|82301.12.peg.278	0	0.5	0	0.75	6.09
fig|82301.12.peg.279	0	0	0	1.26	12.04
fig|82301.12.peg.28	0	0.36	1	4.23	3.28
fig|82301.12.peg.280	0	0	0.5	0.92	11.64
fig|82301.12.peg.281	0	0.93	0.5	2.1	15.62
fig|82301.12.peg.282	0	0.5	0	1	18.89
fig|82301.12.peg.283	0	0	0.03	2	0.77
fig|82301.12.peg.284	0	0	0.39	2.12	0.91
fig|82301.12.peg.285	0	0.15	0	0.21	2.76
fig|82301.12.peg.286	1	2.88	5	22.23	21.46
fig|82301.12.peg.287	0	3.5	2.95	18.96	47.8
fig|82301.12.peg.288	0.5	0	5.44	15.42	11.97
fig|82301.12.peg.289	0	1.5	7.73	18.96	53.61
fig|82301.12.peg.29	0	0	0.23	0.55	16.5
fig|82301.12.peg.290	0	0	0.25	2.07	4.45
fig|82301.12.peg.291	0	0	0.5	0.84	5.46
fig|82301.12.peg.292	0	0	0.5	2.06	8.59
fig|82301.12.peg.293	0	1.5	2	4.93	8.16
fig|82301.12.peg.294	1.5	0.5	9	39.7	32.04
fig|82301.12.peg.295	0.5	2	3	10.69	29.22
fig|82301.12.peg.296	0.5	1.5	4.5	22.01	30.52
fig|82301.12.peg.297	0.57	3	4.5	9.7	16.45
fig|82301.12.peg.298	0.5	5.5	2.34	12.19	26.75
fig|82301.12.peg.299	0	0	3.02	12.05	17.8
fig|82301.12.peg.3	0	0	0.5	4	20.6
fig|82301.12.peg.30	1.5	5	5.34	17.92	29.21
fig|82301.12.peg.300	0.5	0	2.22	5.55	41.95
fig|82301.12.peg.301	0	1	0	2.17	8.39
fig|82301.12.peg.302	0	1	2.5	4.89	28.37
fig|82301.12.peg.303	0	0.5	2	3.97	40.79
fig|82301.12.peg.304	1.5	1	2.18	7.7	19.34
fig|82301.12.peg.305	2.99	2.83	13.5	45.7	66.2
fig|82301.12.peg.306	2.5	7	16.05	58.31	98.61
fig|82301.12.peg.307	0.5	0	1.5	15.25	23.01
fig|82301.12.peg.308	0	0	2	5.07	34.93
fig|82301.12.peg.309	0	0	0	3.12	8.88
fig|82301.12.peg.31	0	0.5	0.47	2.24	6.96
fig|82301.12.peg.310	0	2	5	22	70.83
fig|82301.12.peg.311	0	0	0.65	2	11.93
fig|82301.12.peg.312	0	0	1.5	5.92	7.15
fig|82301.12.peg.313	0	7	2.5	13.2	30.49
fig|82301.12.peg.314	0	0	1	3.21	3.74
fig|82301.12.peg.315	0.7	0	8.41	25.36	33.1
fig|82301.12.peg.316	0.96	1.48	20.5	59.51	41.39
fig|82301.12.peg.317	0	1.16	1.98	4.87	13.81
fig|82301.12.peg.318	1.5	8.5	3.95	20.24	38.39
fig|82301.12.peg.319	1.5	4.12	5.26	24.45	40.29
fig|82301.12.peg.32	0.5	1.5	4	9	30.11
fig|82301.12.peg.320	0.5	2.06	5.66	8.9	19.85
fig|82301.12.peg.321	0.5	1.5	8.8	28.61	35.66
fig|82301.12.peg.322	0	1.62	0.5	2.51	19.19
fig|82301.12.peg.323	0	3	4	8.5	51.71
fig|82301.12.peg.324	0	0	1.53	2.13	10.54
fig|82301.12.peg.325	0	1	1.97	3.5	34.58
fig|82301.12.peg.326	0	1	10.45	31.93	125.84
fig|82301.12.peg.327	0	0	0.22	0.91	4.81
fig|82301.12.peg.328	0	0	6	13.73	22.21
fig|82301.12.peg.329	1.49	0	3.5	13.37	16.1
fig|82301.12.peg.33	0	6	5	17.98	56.16
fig|82301.12.peg.330	0	0	0.36	0.73	9.75
fig|82301.12.peg.331	0	0.5	1.22	5.19	53.01
fig|82301.12.peg.332	0	4	4.62	17.18	29.09
fig|82301.12.peg.333	0	0	0	0	7.25
fig|82301.12.peg.334	0	0	1.84	2.47	2.1
fig|82301.12.peg.335	0	0	0.64	1.83	4.15
fig|82301.12.peg.336	1	0	7	28.03	73.24
fig|82301.12.peg.337	0	0	0	2.82	20.53
fig|82301.12.peg.338	0	1	4	18.5	48.5
fig|82301.12.peg.339	0	1	5.08	15.77	44
fig|82301.12.peg.34	0	0	0.5	4.5	9.54
fig|82301.12.peg.340	0	0	3.37	4.92	13.9
fig|82301.12.peg.341	0	1	2.03	7.02	12.02
fig|82301.12.peg.342	0	2	8.32	22.47	43.31
fig|82301.12.peg.343	0.45	0	0.06	1.5	2.84
fig|82301.12.peg.344	1	0	3.23	15.23	52.3
fig|82301.12.peg.345	0.5	0	2.5	20.22	55.42
fig|82301.12.peg.346	0.5	2.5	2	6.86	13
fig|82301.12.peg.347	0	0	0	0	4.28
fig|82301.12.peg.348	0.5	0.22	7.42	17.95	9.3
fig|82301.12.peg.349	1.53	0	4.34	7.98	12.01
fig|82301.12.peg.35	0	3	4.5	8.5	44.85
fig|82301.12.peg.350	0.5	2	5.45	15.38	28.9
fig|82301.12.peg.351	1	2	2.23	8.3	26.8
fig|82301.12.peg.352	0	0	8	24.6	69.47
fig|82301.12.peg.353	1	11.38	1.24	9.93	11.94
fig|82301.12.peg.354	0.34	0	1.61	2.48	9.64
fig|82301.12.peg.355	1.08	3.5	9.08	28.86	64.23
fig|82301.12.peg.356	1	1.5	5.42	15.03	17
fig|82301.12.peg.357	4.5	1	13.91	42.75	37.02
fig|82301.12.peg.358	0	0	1	5.16	29.97
fig|82301.12.peg.359	0.5	4.72	11.6	35.5	22.7
fig|82301.12.peg.36	0.5	1.5	6.05	16.46	19.14
fig|82301.12.peg.360	0.5	0	3	13.82	43.39
fig|82301.12.peg.361	0.5	0	2.53	3.51	11.67
fig|82301.12.peg.362	0	0	0.08	0.12	1.13
fig|82301.12.peg.363	0	3	1.08	4.85	15.41
fig|82301.12.peg.364	0.5	2.32	1	7.62	51.51
fig|82301.12.peg.365	0	0	2.5	7.14	50.43
fig|82301.12.peg.366	0	3	11.86	35.4	53.26
fig|82301.12.peg.367	0	0	1.5	2	18.86
fig|82301.12.peg.368	1	0.44	7	27.02	46.31
fig|82301.12.peg.369	1.5	9.98	9.5	37.12	55.92
fig|82301.12.peg.37	0	2.5	3.87	9.18	25.52
fig|82301.12.peg.370	0.5	0	4	20.49	19.77
fig|82301.12.peg.371	0.5	0	2.13	12.47	21.01
fig|82301.12.peg.372	0	9	16	50.66	49.04
fig|82301.12.peg.373	0	0	0	0	0
fig|82301.12.peg.374	0	0	0	0	0.37
fig|82301.12.peg.375	0	5.21	2	12.59	74.26
fig|82301.12.peg.376	0	4.15	4.1	12.92	30.96
fig|82301.12.peg.377	0.68	0	0.5	2.04	7.19
fig|82301.12.peg.378	0.5	1	8.5	38.42	92.52
fig|82301.12.peg.379	0	0	0.22	0.88	11.79
fig|82301.12.peg.38	1.58	11	11.5	46.2	88.77
fig|82301.12.peg.380	1	0	0.33	1.75	7.94
fig|82301.12.peg.381	3	0	7	25.91	27.87
fig|82301.12.peg.382	4	0	13.67	33.33	10.77
fig|82301.12.peg.383	0.93	4	4.63	18.07	35.3
fig|82301.12.peg.384	1	0	0.67	9.88	14.96
fig|82301.12.peg.385	0	2	3.39	11.02	43.22
fig|82301.12.peg.386	0	0	0	0	4.5
fig|82301.12.peg.387	0	0	0.5	0.26	4.94
fig|82301.12.peg.388	1	6	4.5	29.13	56.39
fig|82301.12.peg.389	4	1.5	14.87	32.54	45.43
fig|82301.12.peg.39	0.77	0	3.77	17.96	47.66
fig|82301.12.peg.390	0.5	18	5.5	12.38	15.91
fig|82301.12.peg.391	1	3	9.9	33	70.19
fig|82301.12.peg.392	0.5	0	10.02	35.36	83.72
fig|82301.12.peg.393	0	4.6	8.26	19.58	120.13
fig|82301.12.peg.394	0	4.44	6.5	33.25	119.39
fig|82301.12.peg.395	1	2.5	9	33	96.7
fig|82301.12.peg.396	0.5	0	0.5	3.4	21.36
fig|82301.12.peg.397	0	2	0.92	1.5	5.29
fig|82301.12.peg.398	0	0	0.5	1.71	5.85
fig|82301.12.peg.399	0	0	0	0	0
fig|82301.12.peg.4	0	5	0	0	6.08
fig|82301.12.peg.40	0	0	0.8	4.96	12.82
fig|82301.12.peg.400	0	0	0	0	0
fig|82301.12.peg.401	0	0	0	0	0
fig|82301.12.peg.402	0	0	0	0	0
fig|82301.12.peg.403	0	0	0	1	0.5
fig|82301.12.peg.404	0	0	0	0	0
fig|82301.12.peg.405	0	0	1	2.5	1
fig|82301.12.peg.406	0	0	0	0	0
fig|82301.12.peg.407	0	0	0	0	0
fig|82301.12.peg.408	0	0	0	0	0
fig|82301.12.peg.409	0	0	0	0	0
fig|82301.12.peg.41	1	0	2	12.5	26.12
fig|82301.12.peg.410	0	0	1.5	1	3.5
fig|82301.12.peg.411	0	0	0	0	0
fig|82301.12.peg.412	0	0	0	0.5	1.5
fig|82301.12.peg.413	0	6	5	17.46	76.61
fig|82301.12.peg.414	0	0	0.15	0.29	5
fig|82301.12.peg.415	1.5	3.1	1	9.14	34.04
fig|82301.12.peg.416	0	2.04	2	5.3	15.52
fig|82301.12.peg.417	0	2.94	0.97	6.58	20.5
fig|82301.12.peg.418	0	0	0	0.5	4.5
fig|82301.12.peg.419	0	10.98	9.99	35.75	57.21
fig|82301.12.peg.42	0	0	2.37	4.38	15.61
fig|82301.12.peg.420	0	0	0.18	1.08	1.5
fig|82301.12.peg.421	0.5	1.35	8.23	19.17	88.66
fig|82301.12.peg.422	2.5	1.44	14.29	33.77	49
fig|82301.12.peg.423	1.5	0	4.61	19.61	27.02
fig|82301.12.peg.424	1	0.83	8.77	27.48	21.98
fig|82301.12.peg.425	0	0.5	2.25	3.08	21.42
fig|82301.12.peg.426	0	0	0	0	0
fig|82301.12.peg.427	0	0	0.66	1.95	3.44
fig|82301.12.peg.428	0	0	0.09	2.11	3
fig|82301.12.peg.429	0.5	0	2.41	19.12	11
fig|82301.12.peg.43	0	0	0	5.52	35.44
fig|82301.12.peg.430	0	0	5	10.96	43.28
fig|82301.12.peg.431	0	1.5	2	5	26.75
fig|82301.12.peg.432	0.5	2	1.5	18.77	20.98
fig|82301.12.peg.433	0.5	11.5	5.02	10.91	67.26
fig|82301.12.peg.434	1	0	6.55	16.64	18.89
fig|82301.12.peg.435	0	0	0.99	7.17	22.32
fig|82301.12.peg.436	0.5	1.5	3.5	14.41	19.77
fig|82301.12.peg.437	0	0.5	3.24	5.7	21.38
fig|82301.12.peg.438	0	1.81	0.5	3.69	15.15
fig|82301.12.peg.439	6.5	1	32.91	57.14	66.84
fig|82301.12.peg.44	0	0.9	3.5	8.29	26.37
fig|82301.12.peg.440	0.5	2	2.5	12.37	13.69
fig|82301.12.peg.441	1	4.59	2	14.73	66.68
fig|82301.12.peg.442	0	0	1	4	7.75
fig|82301.12.peg.443	0	6	3	11	72.17
fig|82301.12.peg.444	0	0	0.04	3.06	8.69
fig|82301.12.peg.445	0	0	0.5	1	6.71
fig|82301.12.peg.446	0	0	0	0	10.08
fig|82301.12.peg.447	0	0	0.7	0.62	5.82
fig|82301.12.peg.448	0	5.67	10	48.32	120.9
fig|82301.12.peg.449	1	1.16	23.23	57.19	181.27
fig|82301.12.peg.45	0.32	0	1.5	11.49	31.72
fig|82301.12.peg.450	0	4	18	51.97	155.1
fig|82301.12.peg.451	1	0	11.82	34.72	59.16
fig|82301.12.peg.452	2	2.5	6.5	17.15	55
fig|82301.12.peg.453	0	1	0	2.44	8.47
fig|82301.12.peg.454	0	0	0	0.15	2.28
fig|82301.12.peg.455	1.63	2.5	12.88	40.55	34
fig|82301.12.peg.456	0.5	2	3.43	27.9	259.07
fig|82301.12.peg.457	3	0	21.58	53.13	33.24
fig|82301.12.peg.458	0	0	0.04	3.97	3.25
fig|82301.12.peg.459	0	0	0.01	1.98	8.21
fig|82301.12.peg.46	1	5	7	30.53	97.18
fig|82301.12.peg.460	0	0	0.07	1.92	7.65
fig|82301.12.peg.461	0	0	0.05	1.12	2
fig|82301.12.peg.462	0	2	0	3.5	4.08
fig|82301.12.peg.463	0	0	0	1.5	0.83
fig|82301.12.peg.464	0	0	1	6.02	9
fig|82301.12.peg.465	0	0	1.44	0.02	0
fig|82301.12.peg.466	1.9	3	10.5	31.91	29.68
fig|82301.12.peg.467	0	0	0.31	1.75	9.51
fig|82301.12.peg.468	0	0	0	1.44	3.84
fig|82301.12.peg.469	0	1	4.5	16.08	49.96
fig|82301.12.peg.47	0	0.68	3.49	17.33	27.8
fig|82301.12.peg.470	0.5	1.9	2	7.83	49.31
fig|82301.12.peg.471	1.5	0	8	34	38.02
fig|82301.12.peg.472	0.5	0	3	10.19	50.61
fig|82301.12.peg.473	0	1	10.07	26.6	41.93
fig|82301.12.peg.474	0	0	1.82	5.88	12.99
fig|82301.12.peg.475	0	0	0	0.83	1.82
fig|82301.12.peg.476	0.45	0.92	0.5	2.81	3.5
fig|82301.12.peg.477	0.5	1	1.99	18.02	66.39
fig|82301.12.peg.478	1	2	7.49	18.36	67.68
fig|82301.12.peg.479	0	0	0.55	4.25	6.71
fig|82301.12.peg.48	0	2.5	1.79	6.77	29.97
fig|82301.12.peg.480	0	0	0.13	0.92	7.54
fig|82301.12.peg.481	0	1.5	4.97	10.19	53.42
fig|82301.12.peg.482	0	0	1.98	7.15	13.75
fig|82301.12.peg.483	0.74	0	4.68	21.12	59.89
fig|82301.12.peg.484	0.5	0	0	4.34	13.8
fig|82301.12.peg.485	0	0	0	0.99	2.69
fig|82301.12.peg.486	0	0	0.03	0.34	4.96
fig|82301.12.peg.487	0	0	0.48	0.5	32.79
fig|82301.12.peg.488	3	1.24	9.89	24.16	46.9
fig|82301.12.peg.489	1.5	1.17	8.54	35.51	47.11
fig|82301.12.peg.49	0	0	0.5	0	2.87
fig|82301.12.peg.490	1.46	0	3	12	38
fig|82301.12.peg.491	0.5	0.5	3.5	7	34.34
fig|82301.12.peg.492	0	0.65	0	0	1
fig|82301.12.peg.493	0	0	0.5	0.5	3.87
fig|82301.12.peg.494	0	1.5	6.5	16.5	31.17
fig|82301.12.peg.495	0	0	1.5	4.5	28.34
fig|82301.12.peg.496	0.5	0	0.5	1.59	7.8
fig|82301.12.peg.497	0	0	0	3.39	19.78
fig|82301.12.peg.498	0	1.5	13	45.43	82.85
fig|82301.12.peg.499	0	0	0	0.56	3.23
fig|82301.12.peg.5	2.32	2.5	11.27	30.64	73.64
fig|82301.12.peg.50	0.5	0	10.93	47.24	103.68
fig|82301.12.peg.500	1	3	6.5	24.43	82.6
fig|82301.12.peg.501	0.5	1.5	1.33	9.8	22.31
fig|82301.12.peg.502	0	2	3.5	12	25.45
fig|82301.12.peg.503	0	0	0	0	0
fig|82301.12.peg.504	0.08	0	1	1.63	12.5
fig|82301.12.peg.505	0.38	0	1.5	7.02	10.15
fig|82301.12.peg.506	0	0	6	13.32	65.39
fig|82301.12.peg.507	0.5	0	2	10	51
fig|82301.12.peg.508	0.5	0	2	7.36	15.44
fig|82301.12.peg.509	0	0	1.88	4.5	33.5
fig|82301.12.peg.51	0	0	0.33	2.27	5.49
fig|82301.12.peg.510	0.5	1.5	2.61	5.57	22.55
fig|82301.12.peg.511	0.5	1.5	12.27	34.27	79.68
fig|82301.12.peg.512	1.5	2	8	35.3	95.46
fig|82301.12.peg.513	1	1.46	5	20.94	78.24
fig|82301.12.peg.514	0.5	0.21	5.5	17.89	78.32
fig|82301.12.peg.515	0	4.5	7	17.08	27.54
fig|82301.12.peg.516	0	0	0	0.34	8.63
fig|82301.12.peg.517	0	3	0	0	2.71
fig|82301.12.peg.518	0.5	9	9.5	28.62	47.59
fig|82301.12.peg.519	1.5	0	7	25.97	68.27
fig|82301.12.peg.52	0.02	0	0.8	2.53	1.7
fig|82301.12.peg.520	0	0	0.5	3.07	8.35
fig|82301.12.peg.521	0	0	0.5	3.5	11.36
fig|82301.12.peg.522	0.5	9	6	28.77	71.93
fig|82301.12.peg.523	0.5	13	5.64	38.4	153.54
fig|82301.12.peg.524	1	0	6.5	35.03	70.98
fig|82301.12.peg.525	0	0	1.84	1.12	4.46
fig|82301.12.peg.526	0	0	2.63	6.44	5.49
fig|82301.12.peg.527	0	1.96	0	1	23.6
fig|82301.12.peg.528	0	0	0.16	0.58	2.25
fig|82301.12.peg.529	0.5	4	3.5	13.73	33.58
fig|82301.12.peg.53	0	0	0	0.67	6.81
fig|82301.12.peg.530	0	0	2	7.56	10.9
fig|82301.12.peg.531	1	0	3.13	21.96	36.78
fig|82301.12.peg.532	0.5	1.5	2.31	11.91	22.47
fig|82301.12.peg.533	0	0	0	1.46	12.04
fig|82301.12.peg.534	0	0	0.89	3.71	6
fig|82301.12.peg.535	0	2	1.89	11.53	20.44
fig|82301.12.peg.536	0	0	0.5	5.04	52.66
fig|82301.12.peg.537	0	0	0.5	2.51	5.01
fig|82301.12.peg.538	0	3	5.51	23.3	68.87
fig|82301.12.peg.539	0	0	0	1.25	2.5
fig|82301.12.peg.54	0	0	0.21	0	7.32
fig|82301.12.peg.540	0	0	0	0.3	8.9
fig|82301.12.peg.541	0	0	0	0.04	9.5
fig|82301.12.peg.542	1	4.5	11.5	36.43	126.27
fig|82301.12.peg.543	0	1.1	2.99	14.46	33.81
fig|82301.12.peg.544	0	0	1.44	1.96	26.09
fig|82301.12.peg.545	1	1	1.83	11.79	26.34
fig|82301.12.peg.546	4.22	0	8.96	40.75	12.3
fig|82301.12.peg.547	3.5	2	15.16	55.98	69.25
fig|82301.12.peg.548	0	1	5.14	15.16	38.55
fig|82301.12.peg.549	3	1	11.5	40.21	76.75
fig|82301.12.peg.55	0	3	4.5	17.5	35.21
fig|82301.12.peg.550	0.5	0	1.1	1.72	7.71
fig|82301.12.peg.551	0.5	0	6.57	15.45	14.08
fig|82301.12.peg.552	0	2.5	5.5	25.81	39.22
fig|82301.12.peg.553	0	0	0	1.28	1
fig|82301.12.peg.554	0	0	0	1.01	4.25
fig|82301.12.peg.555	0.5	0	6.55	14.39	32.84
fig|82301.12.peg.556	1.5	1.5	8	16.9	21.3
fig|82301.12.peg.557	1.5	0	3	11.59	32.96
fig|82301.12.peg.558	1.51	0.5	10	41.37	65.41
fig|82301.12.peg.559	0.37	0	5	11.87	60.51
fig|82301.12.peg.56	0.5	1.5	10.5	26.92	95.5
fig|82301.12.peg.560	1.17	1.67	6.42	39.75	26.93
fig|82301.12.peg.561	0.5	3.5	7.24	28	49.02
fig|82301.12.peg.562	0	0	0.15	5.94	22.22
fig|82301.12.peg.563	0.5	0	0.82	2.57	14.01
fig|82301.12.peg.564	0	0	0	0.5	2.04
fig|82301.12.peg.565	2	9	14.79	44.91	84.16
fig|82301.12.peg.566	0	1.5	1.28	3.91	41.17
fig|82301.12.peg.567	0	3.5	2.98	15.42	26
fig|82301.12.peg.568	0	0	1	3.28	3.5
fig|82301.12.peg.569	0.12	1	1.74	5.15	4.04
fig|82301.12.peg.57	0.5	0.5	0.5	7.62	25.31
fig|82301.12.peg.570	0	1	0.71	1.41	2.45
fig|82301.12.peg.571	0.5	0	12.81	23.63	31.78
fig|82301.12.peg.572	0	1.5	4.76	19.45	15.52
fig|82301.12.peg.573	2.48	4.5	2.5	10.76	19.24
fig|82301.12.peg.574	0	4.5	1.75	4.24	40.51
fig|82301.12.peg.575	0	0	1	6.56	19.67
fig|82301.12.peg.576	0	0	0	0.5	4.24
fig|82301.12.peg.577	0	0	0.51	2.48	13.6
fig|82301.12.peg.578	3.44	0.5	5.5	25.36	40.31
fig|82301.12.peg.579	0.5	4.5	10.22	25.28	57.56
fig|82301.12.peg.58	0	0	3.5	6.51	13.76
fig|82301.12.peg.580	0	1	2.13	4.04	23.51
fig|82301.12.peg.581	0	0.5	0.35	0.45	5.69
fig|82301.12.peg.582	0	1.5	10.14	30.2	24.15
fig|82301.12.peg.583	0.66	1	4	18.64	28.1
fig|82301.12.peg.584	0	0	1	1	14.68
fig|82301.12.peg.585	0	1.1	1.5	12	38.54
fig|82301.12.peg.586	1	2	7.83	25.5	111.88
fig|82301.12.peg.587	0	0	8.5	24.44	103.32
fig|82301.12.peg.588	0	0	0.5	1.19	14.03
fig|82301.12.peg.589	0	0	1.96	3.33	8.32
fig|82301.12.peg.59	0	0	13.5	30.97	73.34
fig|82301.12.peg.590	0	0	2	1.89	17.42
fig|82301.12.peg.591	0	0	0	2.28	4.69
fig|82301.12.peg.592	0	0	0.68	1	9.19
fig|82301.12.peg.593	0	4.5	5.04	4.33	39.04
fig|82301.12.peg.594	0	0	0.12	3	28.31
fig|82301.12.peg.595	0	2	2.52	12.28	27.21
fig|82301.12.peg.596	1	0	10.29	26.8	92.42
fig|82301.12.peg.597	0.5	0.54	6.5	16.61	42.17
fig|82301.12.peg.598	1	1.6	5.5	14.2	35.63
fig|82301.12.peg.599	4.01	0	7.22	24.27	25.54
fig|82301.12.peg.6	0	0	1	15.54	27.61
fig|82301.12.peg.60	0.5	1.5	8.5	13.59	67.57
fig|82301.12.peg.600	2	0	33.54	83.24	16.03
fig|82301.12.peg.601	0.5	2	5.83	15.94	26.09
fig|82301.12.peg.602	5.5	11	54	158.99	242.06
fig|82301.12.peg.603	0.76	0	1.5	9.7	21.16
fig|82301.12.peg.604	0.15	0	2.95	10.05	18.23
fig|82301.12.peg.605	2.5	2	3.66	13.7	27.21
fig|82301.12.peg.606	0	0	4.31	14.25	17.68
fig|82301.12.peg.607	0.5	0	5	17.36	35.42
fig|82301.12.peg.608	0.5	0	0	3.5	7.26
fig|82301.12.peg.609	0	0	0.5	0	0
fig|82301.12.peg.61	0.5	0.02	5.5	22.25	46.71
fig|82301.12.peg.610	0	0	0	0	0
fig|82301.12.peg.611	0	0	0	2.7	0
fig|82301.12.peg.612	0	0	0	0	2.5
fig|82301.12.peg.613	0	0	0	0	0
fig|82301.12.peg.614	0	0	3.42	10.42	22
fig|82301.12.peg.615	0.5	12	7.72	34.22	50.39
fig|82301.12.peg.616	0.5	0	8.44	20.43	52.1
fig|82301.12.peg.617	0	0.86	0.5	1.64	4.69
fig|82301.12.peg.618	0	0	0	0.5	3.47
fig|82301.12.peg.619	0	0	0.52	1.42	8.49
fig|82301.12.peg.62	0.5	0	1.13	6.21	18.94
fig|82301.12.peg.620	0	0	2.73	11.71	16.28
fig|82301.12.peg.621	1	0	10.66	32.61	24.56
fig|82301.12.peg.622	0.5	0	0.5	5.83	4.92
fig|82301.12.peg.623	0	0	4.52	12.44	32.02
fig|82301.12.peg.624	0	0	0	0.81	11.65
fig|82301.12.peg.625	1.5	0	15.02	49.25	34.24
fig|82301.12.peg.626	2.5	6.5	24.54	77.31	80.88
fig|82301.12.peg.627	0	0	0	1.2	10.24
fig|82301.12.peg.628	0	0.42	1.85	5.48	21.1
fig|82301.12.peg.629	0.5	0	1	3.27	3.61
fig|82301.12.peg.63	1	0	7.5	11.42	62.26
fig|82301.12.peg.630	0	0	1.14	1.91	11.49
fig|82301.12.peg.631	0	2.5	0	1.96	6.12
fig|82301.12.peg.632	0	0	0	1.38	5.14
fig|82301.12.peg.633	0	0	0	0	9.72
fig|82301.12.peg.634	0	0	0	0	19.01
fig|82301.12.peg.635	1.78	10.44	8.07	39	103.51
fig|82301.12.peg.636	0.63	16.47	18.99	62.98	121.84
fig|82301.12.peg.637	0	0.82	2.36	5.58	11.83
fig|82301.12.peg.638	0.24	2.5	3.63	14.89	26.77
fig|82301.12.peg.639	0	2.9	4.12	14.51	81.48
fig|82301.12.peg.64	0.5	5.02	3	15.71	32.65
fig|82301.12.peg.640	0	0	1	2.53	71.71
fig|82301.12.peg.641	2	2	20.83	78.42	60.05
fig|82301.12.peg.642	0.5	10.84	8	25.68	92.34
fig|82301.12.peg.643	0	0	2.33	10.1	10.25
fig|82301.12.peg.644	0.39	0	3.45	6.99	2.29
fig|82301.12.peg.645	2.07	0	4.13	9.49	2.9
fig|82301.12.peg.646	0	0	3.5	14	42.03
fig|82301.12.peg.647	0.5	0	4.5	18.91	38.75
fig|82301.12.peg.648	0	0.5	1.14	4.3	4.49
fig|82301.12.peg.649	0	0	0.5	1.28	13.33
fig|82301.12.peg.65	0.2	0.5	0	2.05	4.87
fig|82301.12.peg.650	0	0	0.88	2.99	7.06
fig|82301.12.peg.651	6	1	21.98	73.03	88.22
fig|82301.12.peg.652	1.05	0	4.14	8.5	40.02
fig|82301.12.peg.653	0	0	1.22	1.46	10.16
fig|82301.12.peg.654	0.03	0	0.74	2.75	13.32
fig|82301.12.peg.655	1.43	0.5	7.72	25.92	89.29
fig|82301.12.peg.656	0.5	1.5	4	29.91	60.92
fig|82301.12.peg.657	0	0	0	2.58	5.49
fig|82301.12.peg.658	0.5	0	1.5	11.27	51.57
fig|82301.12.peg.659	0	0	4.68	10.8	54.65
fig|82301.12.peg.66	0	0	0.41	2.92	2
fig|82301.12.peg.660	0	0	0.28	3.06	12.25
fig|82301.12.peg.661	0	0	1.81	9.27	38.9
fig|82301.12.peg.662	0	0	0	0	0
fig|82301.12.peg.663	0	7.29	7.05	20.14	46.29
fig|82301.12.peg.664	0	2.61	3.13	28.06	37.11
fig|82301.12.peg.665	0.5	1	3.84	24.26	25.75
fig|82301.12.peg.666	0.5	0.5	6	17.82	78.44
fig|82301.12.peg.667	0	0	8.89	32.97	54.03
fig|82301.12.peg.668	0	0	0	3.02	7.51
fig|82301.12.peg.669	0	0	0.92	0.84	6.82
fig|82301.12.peg.67	0	0	1	6.43	26.76
fig|82301.12.peg.670	0	0	0.34	0.05	3.22
fig|82301.12.peg.671	0	2.4	0.14	1.65	3.75
fig|82301.12.peg.672	0	0.5	3.32	12.87	50.59
fig|82301.12.peg.673	0	3	3.5	9.64	30.81
fig|82301.12.peg.674	0	0	7.11	18.74	22.63
fig|82301.12.peg.675	2.53	3	8.94	37.36	43.69
fig|82301.12.peg.676	0.5	4.68	2.5	14.68	32.52
fig|82301.12.peg.677	2.49	0	10.25	27.7	31.14
fig|82301.12.peg.678	0	0	0	0	0.21
fig|82301.12.peg.679	0	0	0.91	2.42	4.73
fig|82301.12.peg.68	0	1.46	1.79	2.87	12.33
fig|82301.12.peg.680	2.13	0	2.66	11.78	12.52
fig|82301.12.peg.681	7.73	2	20.05	82.2	93.1
fig|82301.12.peg.682	0.5	0.5	5.53	11.29	34.09
fig|82301.12.peg.683	0	0	0	0.8	4.73
fig|82301.12.peg.684	0	2.5	1	10.3	56.9
fig|82301.12.peg.685	2	2	5.68	37.92	41.38
fig|82301.12.peg.686	0	0	2.5	9	29.22
fig|82301.12.peg.687	0	0	1.93	7.96	27.88
fig|82301.12.peg.688	0.71	0.5	6.44	17.07	21.39
fig|82301.12.peg.689	0.28	0.5	5.25	14.5	20.29
fig|82301.12.peg.69	0.5	2	4.67	17.12	46.39
fig|82301.12.peg.690	3.5	3.5	10.04	38.76	45.68
fig|82301.12.peg.691	1	0.5	3.5	7.94	20.78
fig|82301.12.peg.692	0	0.5	1.5	3.33	15.97
fig|82301.12.peg.693	0	0	1.61	4.99	12.82
fig|82301.12.peg.694	0	0	6.5	31.34	62.98
fig|82301.12.peg.695	0	0.5	3.5	10.86	33.54
fig|82301.12.peg.696	0.5	0.5	5.9	12.3	52.37
fig|82301.12.peg.697	0	0	1.5	3.15	14.23
fig|82301.12.peg.698	3.4	0	7	43.35	15.79
fig|82301.12.peg.699	0.47	0	3.89	20.22	16.63
fig|82301.12.peg.7	1.5	0	6	21.24	11.82
fig|82301.12.peg.70	0	1	3	14.68	70.85
fig|82301.12.peg.700	0.5	0	4.5	5.74	20.02
fig|82301.12.peg.701	0	2	0.5	3.79	4.46
fig|82301.12.peg.702	2.43	4.88	14.89	61.19	52.53
fig|82301.12.peg.703	0.54	0.56	3.88	21.7	22.28
fig|82301.12.peg.704	6.72	1.14	23.03	75.94	29.72
fig|82301.12.peg.705	0.5	0	9.25	39.11	35.58
fig|82301.12.peg.706	0	1.5	5.5	14.96	10.22
fig|82301.12.peg.707	0	0.5	10.96	19.03	40.12
fig|82301.12.peg.708	0.5	0	2.92	11.4	16.38
fig|82301.12.peg.709	0.97	2.5	7.02	22.5	48.46
fig|82301.12.peg.71	0	0	3.5	12.51	31.3
fig|82301.12.peg.710	0	0	0	0	3
fig|82301.12.peg.711	0	0	0	0.78	4.39
fig|82301.12.peg.712	0	0	0.28	1.35	8.78
fig|82301.12.peg.713	0.5	0	3.5	19.3	70.7
fig|82301.12.peg.714	3	12	16.5	52.91	83.21
fig|82301.12.peg.715	0	0	0.32	1.97	39.28
fig|82301.12.peg.716	0	0.03	0	2.37	18.95
fig|82301.12.peg.717	0	0	0	0.36	3.38
fig|82301.12.peg.718	0.21	3.5	0.76	2.26	7.18
fig|82301.12.peg.719	0	0	0	0.03	9.75
fig|82301.12.peg.72	1	0.5	5.15	15.08	53.89
fig|82301.12.peg.720	0	0	0	0.76	3.34
fig|82301.12.peg.721	0	1	0.5	0.2	16.91
fig|82301.12.peg.722	2	1.5	4.82	15.49	45.79
fig|82301.12.peg.723	0.17	2.5	4.85	20.72	36.31
fig|82301.12.peg.724	0	2	1	5.85	22.9
fig|82301.12.peg.725	0	0	3.5	16.49	54.4
fig|82301.12.peg.726	0	1	6.11	29.75	70.83
fig|82301.12.peg.727	0	0	6.38	21.31	30.07
fig|82301.12.peg.728	0	3	5	32.4	84.29
fig|82301.12.peg.729	0.5	0	2.1	14.94	44.9
fig|82301.12.peg.73	0.5	4.28	5.46	21.91	28.1
fig|82301.12.peg.730	1	2.5	4.5	19.47	34.67
fig|82301.12.peg.731	0	0	2.34	2	12.43
fig|82301.12.peg.732	0	0.18	1.2	2.86	6.88
fig|82301.12.peg.733	0	0	1.31	3.6	14.42
fig|82301.12.peg.734	0	0	0.5	4.57	4.52
fig|82301.12.peg.735	0	5	1.39	5.02	8.68
fig|82301.12.peg.736	0	0	0.3	2.77	9.5
fig|82301.12.peg.737	0.5	0	0.5	3.5	5.5
fig|82301.12.peg.738	1	0.5	6.5	19.3	50.06
fig|82301.12.peg.739	0.31	4.5	2.95	12.26	51.54
fig|82301.12.peg.74	1	0	5.94	20.77	12.86
fig|82301.12.peg.740	0	29.5	7.5	23.48	62.4
fig|82301.12.peg.741	0	0.5	0	2.62	8.12
fig|82301.12.peg.742	0.5	3.26	2.44	12.18	44.64
fig|82301.12.peg.743	0	0	0	0.87	2.2
fig|82301.12.peg.744	0	1.5	3	11.84	19.81
fig|82301.12.peg.745	0	0	0.88	2.54	2.83
fig|82301.12.peg.746	0.5	0	0	2.5	10.98
fig|82301.12.peg.747	0	0	0.5	2.25	5.15
fig|82301.12.peg.748	0	0	1.57	10.72	14.29
fig|82301.12.peg.749	0	0	1.16	2.81	14.88
fig|82301.12.peg.75	0	13	5	21.68	69.58
fig|82301.12.peg.750	0.5	1	7	24.53	18.13
fig|82301.12.peg.751	4	18	32.31	74.04	106.09
fig|82301.12.peg.752	4.5	9	29	128.24	182.93
fig|82301.12.peg.753	0	0	2.34	6.88	6.35
fig|82301.12.peg.754	1.5	1.81	7.14	21.35	53.35
fig|82301.12.peg.755	0	0	0.41	1.08	2.45
fig|82301.12.peg.756	0	0	8	24.61	54.58
fig|82301.12.peg.757	0	3	1.22	7.94	66.26
fig|82301.12.peg.758	0	0	2.98	13.91	50.93
fig|82301.12.peg.759	1.5	0	3.5	3.29	32.76
fig|82301.12.peg.76	0.5	5	8	14.37	45.21
fig|82301.12.peg.760	0	0	0	0.33	3.33
fig|82301.12.peg.761	1.5	5.18	15.27	56.1	56.5
fig|82301.12.peg.762	1	1.62	5.5	18.92	10.61
fig|82301.12.peg.763	1.5	3.5	11	47.72	34.25
fig|82301.12.peg.764	1.5	3	22.02	70.75	129.47
fig|82301.12.peg.765	0.56	0	1	2.15	5.04
fig|82301.12.peg.766	0	0	0	2.13	17.6
fig|82301.12.peg.767	0.5	0	2.5	12.66	55.81
fig|82301.12.peg.768	0.5	0	3	9.02	30.96
fig|82301.12.peg.769	0	0	1	2	6.03
fig|82301.12.peg.77	0	0	0	0.77	7.63
fig|82301.12.peg.770	0.5	0	5.32	15.5	30.65
fig|82301.12.peg.771	0	2.5	4.5	12.75	91.27
fig|82301.12.peg.772	1.32	1	2.36	8.27	11.76
fig|82301.12.peg.773	1	0	6.74	42.01	55.1
fig|82301.12.peg.774	0.5	0	1.5	7.23	16.64
fig|82301.12.peg.775	0.5	0.5	3.42	11.57	19.21
fig|82301.12.peg.776	0	0	2.46	7.95	36.44
fig|82301.12.peg.777	1	0	1.29	8.8	13.58
fig|82301.12.peg.778	0.5	0	1.5	1.94	36.22
fig|82301.12.peg.779	2	1.96	7.55	30.51	76.16
fig|82301.12.peg.78	1.5	5.5	9.5	26.5	114.61
fig|82301.12.peg.780	0	0.01	6.42	25.11	14.53
fig|82301.12.peg.781	0.5	2	3.01	20.58	11.63
fig|82301.12.peg.782	1	0.5	2.7	8.24	11.48
fig|82301.12.peg.783	0	0	1	5.57	55.16
fig|82301.12.peg.784	0	0	0.57	0.8	16.55
fig|82301.12.peg.785	0	0	0.24	0.65	3.31
fig|82301.12.peg.786	0	0	0.81	1.2	3.75
fig|82301.12.peg.787	0	0	0	3.07	3.88
fig|82301.12.peg.788	0.5	2.4	7.52	22.12	47.88
fig|82301.12.peg.789	0	0.55	4.82	13.56	13.67
fig|82301.12.peg.79	1.5	0	18.44	55.5	74.92
fig|82301.12.peg.790	0	1.5	0.5	0.8	4.33
fig|82301.12.peg.791	2	8	18.36	67.5	83.85
fig|82301.12.peg.792	2.57	0	11.67	26.24	24.9
fig|82301.12.peg.793	0	0	2.3	12.72	7.2
fig|82301.12.peg.794	1	0	7.82	15.9	15.4
fig|82301.12.peg.795	0.5	1.62	7.88	34.01	28.28
fig|82301.12.peg.796	0	0	0	1	2.93
fig|82301.12.peg.797	0	0	0.5	3.5	14.37
fig|82301.12.peg.798	0	0	1.48	7.98	7.35
fig|82301.12.peg.799	1	2.5	14.02	48.22	78.82
fig|82301.12.peg.8	0.5	2.5	6.54	22.91	53.6
fig|82301.12.peg.80	2.5	0	8.49	21.65	24.88
fig|82301.12.peg.800	7.25	7	51.72	124.27	85.07
fig|82301.12.peg.801	1.5	3	7.5	34.12	39.38
fig|82301.12.peg.802	1	0.16	1.23	12.89	40.74
fig|82301.12.peg.803	0.5	0	3.6	9.87	8.52
fig|82301.12.peg.804	0	1	1	1.88	10.78
fig|82301.12.peg.805	0	0	0.48	1.73	7.9
fig|82301.12.peg.806	0	1.5	6.5	24.51	41.42
fig|82301.12.peg.807	0	0	1.5	1.33	3.73
fig|82301.12.peg.808	0	0	0.18	2.64	1.15
fig|82301.12.peg.809	0.5	0.74	1.53	7.07	4.56
fig|82301.12.peg.81	0.5	0	0.84	14.65	22.8
fig|82301.12.peg.810	0.5	2.82	10.4	31.27	37.39
fig|82301.12.peg.811	0.88	3.5	8.58	23.01	48.39
fig|82301.12.peg.812	1	0.5	3.88	21.72	38.57
fig|82301.12.peg.813	0	0	1.74	1.97	13.87
fig|82301.12.peg.814	0	0	1	1.14	3.5
fig|82301.12.peg.815	1.5	4.5	11.47	37.16	72.93
fig|82301.12.peg.816	0	0	1.96	3.63	5.98
fig|82301.12.peg.817	1.5	3.5	7.83	45.38	149.13
fig|82301.12.peg.818	0	15	6	31.85	32.02
fig|82301.12.peg.819	1.5	0	1.85	4.75	6.95
fig|82301.12.peg.82	0	1	9	17.71	39.94
fig|82301.12.peg.820	0	0.5	4.13	13.4	29.89
fig|82301.12.peg.821	0	0	3.5	14.96	25.66
fig|82301.12.peg.822	0	1.52	7.5	19.47	31.96
fig|82301.12.peg.823	1	0.4	6.38	12.51	30.09
fig|82301.12.peg.824	1	0.5	9.75	30.52	48.5
fig|82301.12.peg.825	1.42	1	10.19	26.37	9.44
fig|82301.12.peg.826	0.5	0	2.72	4.84	5.13
fig|82301.12.peg.827	0.44	0	7.86	15.22	50
fig|82301.12.peg.828	0	0	4.5	27.33	25.5
fig|82301.12.peg.829	0.5	1.5	4	17.77	49.13
fig|82301.12.peg.83	0.5	1.5	6.5	16.54	39.87
fig|82301.12.peg.830	0	2.5	5.4	24.5	39.93
fig|82301.12.peg.831	1	2.2	4.5	18.12	23.8
fig|82301.12.peg.832	0	0	2.73	3.89	30.66
fig|82301.12.peg.833	0	0	0	1.28	6.2
fig|82301.12.peg.834	0	0	0.83	6.15	27.92
fig|82301.12.peg.835	0	0	1	0.76	0.5
fig|82301.12.peg.836	0.5	0	0.5	8.16	20.11
fig|82301.12.peg.837	1.5	0	9	60.49	66.22
fig|82301.12.peg.838	0.5	0	3.5	11.71	14.42
fig|82301.12.peg.839	1.38	0.5	2.5	12.55	18.6
fig|82301.12.peg.84	1	0	8.36	23.61	25.37
fig|82301.12.peg.840	0.5	0	8.12	26.08	34.99
fig|82301.12.peg.841	1.14	0	2.96	14.17	5.77
fig|82301.12.peg.842	0	0	1.5	9.89	39.36
fig|82301.12.peg.843	1	6	4.5	27.05	58.71
fig|82301.12.peg.844	0	0	0.5	0.4	17.96
fig|82301.12.peg.845	1	3.5	3.48	21.92	31.98
fig|82301.12.peg.846	2	2.5	13.77	38.77	78.37
fig|82301.12.peg.847	1	0	3.7	12.91	23.44
fig|82301.12.peg.848	0	0.08	0.22	0.32	3.19
fig|82301.12.peg.849	0.5	0	2	6.27	20.35
fig|82301.12.peg.85	1	7.5	10.42	37.83	91.63
fig|82301.12.peg.850	0	3.5	5.27	11	67.5
fig|82301.12.peg.851	0	1	3.05	7.32	38.48
fig|82301.12.peg.852	0	0.5	3.43	14.92	25.42
fig|82301.12.peg.853	0	0	0.26	0.52	7.48
fig|82301.12.peg.854	0.5	8.08	11.9	39.19	71.07
fig|82301.12.peg.855	0.5	0	0.5	2.31	2.93
fig|82301.12.peg.856	0.5	2	4.94	28.59	36.58
fig|82301.12.peg.857	0	0	4.5	21.57	48.23
fig|82301.12.peg.858	1.5	0	3	13.56	38.68
fig|82301.12.peg.859	0	0	0.5	0.36	16.41
fig|82301.12.peg.86	0	0	0	2.03	4
fig|82301.12.peg.860	0	0	0	1	6.38
fig|82301.12.peg.861	1.5	3	5.5	30	58.7
fig|82301.12.peg.862	0	0.12	0.62	1.01	12.98
fig|82301.12.peg.863	0	0	0	2.23	3.18
fig|82301.12.peg.864	0	1.14	0.4	2.31	4.79
fig|82301.12.peg.865	0	0.5	6	26.35	100.19
fig|82301.12.peg.866	0.5	1	8	26.24	39.52
fig|82301.12.peg.867	1	0	4	17.86	21.8
fig|82301.12.peg.868	0	0	0.42	0	1.5
fig|82301.12.peg.869	1.96	13	8	43.71	85.73
fig|82301.12.peg.87	0	0	0.13	0.5	23.27
fig|82301.12.peg.870	0.2	0	0	3.19	10.71
fig|82301.12.peg.871	0	1.5	1.95	11	45.9
fig|82301.12.peg.88	0.21	0	3.75	11.87	24.6
fig|82301.12.peg.89	0	2.5	6	13.77	49.36
fig|82301.12.peg.9	1	12.46	10.5	27.06	95.99
fig|82301.12.peg.90	0	0	2.5	6.74	14.64
fig|82301.12.peg.91	0.5	5.5	4	15.54	50.05
fig|82301.12.peg.92	1.86	2.5	3.5	14.9	41.74
fig|82301.12.peg.93	0.98	0	0.79	3.26	2.79
fig|82301.12.peg.94	0	1.5	5.5	21.75	53.32
fig|82301.12.peg.95	0	4.5	2.66	10.9	43.56
fig|82301.12.peg.96	0	2.5	3.86	12.02	31.6
fig|82301.12.peg.97	0	0	2.64	10.9	22.36
fig|82301.12.peg.98	0	0	2.5	14.95	35.31
fig|82301.12.peg.99	0.5	0	4.25	15.25	23.67

## Sheet: Darby et al., 2014
darby_wmel_doxy_a	darby_wmel_doxy_b	darby_wmel_doxy_c	darby_wmel_nodoxy_c	darby_wmel_nodoxy_a	darby_wmel_nodoxy_b
cds0	94.59	53.84	86.91	83.54	38.21	53.01
cds1	14.09	17.5	18.75	19.56	12.27	15.86
cds10	825.32	637.86	476.07	214.5	211.73	403.47
cds100	1.41	0	0.99	1.45	0.47	0
cds1000	1.23	10.23	5.14	2.53	2.77	7.44
cds1001	0.06	0.03	0.43	0	0.21	0.46
cds1002	27.42	18.83	29.86	30.51	19.22	8.22
cds1003	85.4	23.36	51.05	33.18	13.49	72.59
cds1004	2.43	4.22	4.02	3.93	2.55	5.69
cds1005	41.08	18.5	33.24	36.78	18.5	34.43
cds1006	2.53	0	4.84	2.1	0	3.28
cds1007	26.87	18.87	23.15	18.52	14.2	21.5
cds1008	17.08	8.95	11.97	13.7	9.91	13.59
cds1009	139.87	95.88	77.78	28.9	25.47	76.42
cds101	0.79	0	0.48	0	0.53	0.5
cds1010	58.48	29.92	48.25	34.55	14.6	31.15
cds1011	42.06	17.78	27.32	39.75	11.73	33.31
cds1012	56	14.7	50.6	48.19	37.78	71.12
cds1013	2	8.44	4.25	3.47	3.31	2.37
cds1014	56.89	8	25.86	5.51	8.59	23.66
cds1015	157.62	92.26	112.35	84.71	43.55	69.84
cds1016	123.38	80.64	62.36	43.02	39.43	29.46
cds1017	2.6	0.3	1.92	0.63	0.05	1.18
cds1018	28.83	3.27	9.98	8.2	10.86	7.01
cds1019	19.06	3.28	15.92	2.52	1.2	4.24
cds102	46.7	19.45	25.67	28.75	14.25	20.21
cds1020	506.46	321.07	310.96	193.74	104.86	238.19
cds1021	16.77	5.68	5.74	13	10	21.41
cds1022	10.68	14.67	10.28	6.5	5.2	6.38
cds1023	11.46	1.68	12.57	3.59	1.09	3.82
cds1024	1.26	0.47	0	0	1.5	0.44
cds1025	37.01	30.46	16.65	11.44	10.09	22.15
cds1026	88.66	39.67	44.61	45.71	28.63	61.08
cds1027	44.4	24.46	21.77	28.11	8.11	32.95
cds1028	28.14	26.13	33.22	14.89	13.48	23
cds1029	56.9	22.69	28.37	16.27	29.26	35.29
cds103	96.2	42.58	48.12	25.14	12.5	26.74
cds1030	13.3	2.28	10.82	6.83	3.37	4.31
cds1031	78.01	80.76	59.19	25.05	15.07	36.07
cds1032	30.6	14.51	21.03	20.74	10.14	17.22
cds1033	49.22	42.52	13.32	10.64	10.42	5.12
cds1034	27.93	7.46	27.23	47.95	26.18	32.04
cds1035	49.85	25.16	47.2	56.4	29.58	52.45
cds1036	95.89	85.7	83.56	66.2	38.11	75.15
cds1037	12.24	5.19	11.26	9.09	15.52	14.89
cds1038	145.54	100.55	95.83	135.17	70.42	180.46
cds1039	48.3	28.2	33.56	43.57	30.22	68.05
cds104	132	82.88	101.78	68.14	52.92	80.69
cds1040	42.95	14.27	23.74	17.96	15.66	18.3
cds1041	23.12	16.25	31.51	3.78	3.92	2.74
cds1042	1	1.01	0	6.45	0.84	0.9
cds1043	0.11	2	0	0.35	1.2	0
cds1044	94.87	38.67	53.1	47.25	19.09	41.28
cds1045	33.8	21.66	18.86	13.2	1.98	18.53
cds1046	49.53	19.83	28.82	23.96	12.22	32.37
cds1047	12.07	16.47	14.46	11.19	7.52	9.32
cds1048	19.17	6.39	7.71	18.94	8.2	26.82
cds1049	12	5.5	8.84	7.6	7.03	15.99
cds105	47.16	17.07	46.6	42.79	28.6	58.42
cds1050	67.99	42.72	39.52	24.25	20.74	49.15
cds1051	39.91	13.72	29.04	31.26	13.19	29.01
cds1052	59.36	62.57	46.45	32.25	25.65	41.76
cds1053	109.5	56.06	78.09	43.89	30.5	48.31
cds1054	40.53	5.13	25.5	7.23	1.11	9.65
cds1055	88.44	31.46	63.15	16.67	6.8	46.31
cds1056	2251.78	1426.74	1259.64	859.12	666.75	1343.93
cds1057	31.87	13.44	40.43	25.75	30.08	28.04
cds1058	46.9	21.93	26.95	16.49	11.82	18.17
cds1059	6.54	5.96	4.59	7.96	3.91	2.97
cds106	5	9.43	6.4	0.88	0	2
cds1060	4.4	1.14	3.49	3.5	2.5	9.64
cds1061	97.75	27.47	67.28	69.9	47.56	77.68
cds1062	62.85	17.33	35.45	21.77	9.82	82.12
cds1063	46.56	13.78	29.55	46.61	18.91	39.35
cds1064	20.83	15.5	13.34	12.61	15.27	20.96
cds1065	0.15	0.5	0	0	0.5	0.5
cds1066	0.19	0.64	0.01	0	0	0.06
cds1067	89.51	101.87	55.12	31.72	17.93	19.84
cds1068	56.45	27.16	26.35	4.96	5.75	28.61
cds1069	23.5	28.5	22.09	12.37	10.19	12.64
cds107	51.76	37.34	12.77	20.83	13.92	65.95
cds1070	19.13	16.74	8.52	0.65	2.98	5.58
cds1071	25.34	8.5	26.73	25.21	18.16	23.42
cds1072	9.67	11.86	12.77	13.7	13.67	9.78
cds1073	1.77	0.33	1.86	2.46	3	1.81
cds1074	47.63	35.88	37.29	28.98	4.56	22.19
cds1075	20.91	10.35	14.92	17.36	7.45	21.07
cds1076	84.9	66.75	51.13	27.19	14.99	19.49
cds1077	47.59	46.37	62.66	31.38	13.75	45.59
cds1078	3.01	2	3.93	6.94	2.56	4.73
cds1079	19.51	4.17	4.55	6.56	4.21	22.29
cds108	304.82	232.2	160.45	122.76	100.91	207.15
cds1080	58.7	26.61	38.75	38.28	17.48	76.23
cds1081	10.55	5.78	9.06	13	7.5	11.1
cds1082	16.92	21.96	12	9	8	21.5
cds1083	36.98	9.44	29.97	35.89	28.79	33.61
cds1084	56.21	30.99	24.35	18.48	17.84	19.49
cds1085	14.32	16.44	5.76	4.74	9.22	12.03
cds1086	9.68	4.7	6.63	6.96	8.54	7.99
cds1087	26.53	17.24	25.91	37.97	18.65	38.43
cds1088	84.69	23.22	43.02	44.67	14.95	36.56
cds1089	56.54	52.92	45.8	35.87	23.32	24.78
cds109	59.25	33.7	19.96	6.35	6.56	11.94
cds1090	106.65	49.48	60.16	57.99	48.3	77.83
cds1091	20.49	13.3	39.15	25.73	19.17	48.11
cds1092	114.01	54.85	59.86	11.38	22.23	17.78
cds1093	66.16	35.37	48.27	35.59	32.1	96.52
cds1094	224.92	120.97	154.43	146.69	83.13	116.01
cds1095	14.28	8.56	16.56	14.36	4.63	33.34
cds1096	9.54	10.04	10.22	13.22	6.3	14.43
cds1097	110.69	62.61	68.68	26.89	37.11	68.89
cds1098	39.98	26	40.89	24	27.5	62.5
cds1099	24.64	23.5	13.86	5.6	5.54	10.49
cds11	220.41	118.81	134.69	51.12	39.46	67.63
cds110	232.99	156.79	74.6	59.7	43.24	53.78
cds1100	45	31.38	33.09	56.62	22.01	44.5
cds1101	0.98	0	0	0.62	0	0.89
cds1102	137.32	151.88	50	66.73	51	108.73
cds1103	67.49	29.99	45.52	46.3	29.91	78
cds1104	9.18	3.99	6.56	9.24	4.15	12.98
cds1105	29.4	10.36	10	8.14	3.65	11.76
cds1106	13.73	19.74	20.88	8.72	11.09	11.62
cds1107	108.89	149.89	91.11	50.36	48.62	104.01
cds1108	141.35	59.28	128.01	39.65	46.87	36.23
cds1109	31.07	14.53	24.02	18.26	17.74	27.99
cds111	81.96	62.53	53.79	24.73	26.9	32.34
cds1110	56.09	31.98	55.95	18.13	10.19	43.19
cds1111	325.64	197.86	117.99	53.67	55.18	188.61
cds1112	103.66	66.84	89.15	56.23	27.02	82.37
cds1113	176.82	136.29	110.19	77.33	42.64	99.69
cds1114	50.2	24.12	64.81	47.45	19.85	50.36
cds1115	34.56	14.66	18.79	21.6	3	15.47
cds1116	56.16	26.13	43.58	47.81	39.22	95.87
cds1117	36.51	11	25.95	29.44	15.38	48.9
cds1118	167.34	139.67	93.26	28.35	34.23	85.32
cds1119	565.28	323.47	282.97	165.23	147.45	150.29
cds112	295.62	166.51	158.77	91.62	71.65	187.2
cds1120	9.31	9.95	10.01	6.24	3.37	7.23
cds1121	21.22	13.86	24.38	43.1	9.77	16.63
cds1122	48.42	40.98	22.62	29.24	27.2	28.87
cds1123	193.8	110.81	77.49	51.94	34.63	91
cds1124	10.77	10.31	6.41	9.2	10.65	10.76
cds1125	97.56	58.53	72.57	25.83	25.51	28.31
cds1126	230.1	126.58	210.22	103.9	66.47	138.14
cds1127	211.75	206.8	142.7	58.37	55.05	118.72
cds1128	50.66	43.57	23.62	6.45	6.84	21.12
cds1129	70.84	26.84	23.25	38.54	16.17	30.94
cds113	74.59	34.2	45.48	25.31	23.85	14.14
cds1130	40.82	19.39	16.7	16.28	11.22	47.07
cds1131	69.19	34.18	41.81	38	33.31	63.11
cds1132	22.75	28.49	26.75	23.21	7.53	20.43
cds1133	21.21	10.91	18.31	18.75	12.38	16.77
cds1134	0.14	0	0	0.07	0	0.19
cds1135	51.76	17.5	31.52	19.6	12.57	12.47
cds1136	40.05	21.56	28.91	22.21	8.19	15.98
cds1137	30.91	13.48	14.49	12.41	8.97	8.8
cds1138	296.59	267.37	199.35	90.82	68.1	205.96
cds1139	11.18	1.63	7.58	7.36	6.46	18.27
cds114	36.63	4.92	36.44	15.5	11.96	22.55
cds1140	20.53	9.5	16.12	12.45	18.59	20.52
cds1141	7.65	5.98	13.73	11.92	6.69	11.8
cds1142	15.93	3.43	8.99	16.29	14.23	19.91
cds1143	55.91	14.03	26.52	31.13	19.47	30.62
cds1144	27.15	7.24	7.36	13.46	5.28	11.25
cds1145	26.17	20.31	24.97	34.15	12.07	25.01
cds1146	47.86	16.53	36.04	22.43	5.76	12.07
cds1147	97.41	40.22	65.52	44.07	25.18	46.13
cds1148	1011.54	750.01	519.76	383.7	422.83	473.74
cds1149	307.18	260.72	121.71	158	79.28	132.15
cds115	65.25	51.5	64.98	31.96	14.58	87.12
cds1150	45.18	16.38	39.84	28.23	18.02	36.34
cds1151	143.31	80.4	67.38	66.19	52.82	88.4
cds1152	21.5	5.29	17.96	14.81	8.19	19.75
cds1153	30.09	21.26	12.81	15.43	13.35	19.38
cds1154	49	52.5	29.71	14.27	20.5	29.33
cds1155	8.2	4.66	8.91	5.5	5.73	3.43
cds1156	87.56	80.54	84.74	58.75	46.24	121.32
cds1157	75.68	47.5	41.13	12.68	11.2	47.18
cds1158	3.93	1.4	5.83	0.84	0	3.84
cds1159	130.53	73.87	33.04	24.49	37.16	28.7
cds116	31.17	6.97	8.19	11.5	10.22	9
cds1160	8.87	5	2.33	12.17	10.62	24.85
cds1161	171.33	58.9	94.96	82.37	43.2	78.04
cds1162	118.24	105.08	82.6	28.07	39.99	66.47
cds1163	34.83	32.99	13.59	7.33	10.41	19.15
cds1164	50.94	19.91	22.62	38.12	12.15	37.56
cds1165	181	105	117.84	107.42	67.8	114.65
cds1166	62.05	60.28	39.8	16.84	17.22	43.07
cds1167	563.78	312.75	385.36	308.14	238.6	224.47
cds1168	82.56	75.1	47.25	41.73	25.81	31.25
cds1169	109	35.24	74.29	39.71	19.62	51.68
cds117	58.72	48.15	39.12	34.22	24.95	75.29
cds1170	71.14	27.98	43.53	43.62	10.99	49.54
cds1171	14.75	20.63	18.52	4.85	5.11	39.07
cds1172	122.72	74.55	72.46	32.6	27.8	63.51
cds1173	188.25	105.25	96.24	106.22	78.17	135.6
cds1174	75.5	49.26	42.15	18.78	13.7	53.04
cds1175	26.17	13.53	18.8	17.11	3.24	11.79
cds1176	7.85	1	7.16	7	5.5	7.08
cds1177	25.74	7.72	17.88	14.2	18.68	24.49
cds1178	148.06	116.26	83.13	79.13	33.32	106.43
cds1179	321.55	241.33	186.55	114.33	65.64	183.49
cds118	31.54	9.82	24.86	28.79	20.5	38.52
cds1180	19.14	10.23	17.77	20.5	12.81	26.61
cds1181	43.04	15	24.67	14.02	8	33.73
cds1182	6.69	12.19	5.46	5.74	3.92	1.93
cds1183	63.86	42.06	23.84	4.06	4.99	36.27
cds1184	186.75	67.21	152.08	269.7	182.82	272.75
cds1185	2135.96	1260.24	935.66	1144.95	913.4	1171.95
cds1186	43.24	23.41	21.7	21.89	9.6	30.22
cds1187	31.5	17.17	24.44	29	15.74	21.1
cds1188	105.78	84.62	51.64	12.7	14.33	46.84
cds1189	21.11	7.68	17.75	13.8	6	11.34
cds119	4.16	15.96	4.31	2.85	0.5	1.27
cds1190	87.26	65.29	68.07	43.72	20.64	57
cds1191	37.38	14.67	24.32	16.88	12.83	12.08
cds1192	233.99	161.01	112.65	154.91	97.6	114.83
cds1193	30.61	26.12	22.13	33.74	13.15	23.36
cds1194	1.17	2.44	0.55	1.95	1.06	4.25
cds1195	27.11	19.36	17.82	7.91	5.48	25.74
cds1196	14.02	4	5.33	16.7	5.37	7.41
cds1197	37.25	16.61	24.8	42	13.84	58.53
cds1198	33.94	14.45	12.26	28.02	9.28	17.12
cds1199	69.18	45.66	41.42	34.65	30.53	59.71
cds12	557.81	247.31	369.32	173.2	83.11	190.72
cds120	251.21	210.35	157.13	71.42	56.07	235.91
cds1200	2.24	0.75	1.08	2.94	1.21	3.62
cds1201	112.32	35.5	76.34	72	62.63	87.61
cds1202	9.61	11.89	4.59	3.37	1.51	0.64
cds1203	18.18	11.4	4.87	1.7	5.98	16.26
cds1204	20.08	6.33	17.98	36.05	6.26	11.88
cds1205	100.49	46.19	69.96	80.11	38.99	73.7
cds1206	15.5	8.82	7.06	2.31	1.43	6.29
cds1207	10.39	9.71	8.49	2.81	2.79	2.21
cds1208	23.78	5.19	4.15	4.98	2.53	6.85
cds1209	12.36	2.9	7.66	1.34	0.24	3.09
cds121	70.49	33.41	49.21	19.09	22.09	35.74
cds1210	13.25	0.99	13.45	2.3	0.95	2.3
cds1211	1189.36	757.05	452.55	259.88	319.67	551.02
cds1212	35.7	18.54	13.69	11.67	9.05	12.84
cds1213	37.73	36.88	14.63	16.72	12.15	10.86
cds1214	80.83	37.18	39.26	61.2	37.56	43.95
cds1215	156.64	92.82	102.79	84.29	41.12	64.65
cds1216	3.14	1.78	6.34	8.49	7.11	5.25
cds1217	119.86	87.47	77.17	86.35	72.94	146.57
cds1218	35.91	10.29	10.72	6.08	13.9	42.83
cds1219	26.96	47.05	27.59	24.5	9	52.82
cds122	87.62	27.96	31.46	44.54	13.95	31.03
cds1220	37	20.39	29.1	48.03	29.04	67.13
cds1221	79.64	62.98	43.38	14.08	8.22	41.72
cds1222	8.02	3.76	12.27	6.61	3.48	9.55
cds1223	17.96	8.31	19.11	11.39	13.85	9.15
cds1224	132.1	55.04	101.16	59.76	35.99	51.09
cds1225	284.36	248.52	214.82	80.32	60.75	111.73
cds1226	74.12	51.36	61.12	49.01	37.65	71.22
cds1227	68.29	56.23	44.13	41.92	28.31	46.01
cds1228	9.87	3.05	12.18	11.59	4.09	8.77
cds123	3.02	1.1	2.67	2.8	4.5	0.52
cds124	0.82	7.43	1.69	2.16	0.5	1.21
cds125	3.77	6.06	1.83	6.54	4.5	6.32
cds126	5.44	4.24	8.15	15.67	4.83	15.03
cds127	195.14	125.3	105.07	59.06	52.1	127.58
cds128	19.56	2.2	12.35	11.15	3.37	8.04
cds129	3.25	1.11	2.57	1.39	1.5	3.78
cds13	311.69	123.84	247.53	95.81	65.61	125.22
cds130	122.62	37.48	66.36	25.08	27.2	24.14
cds131	50.4	20	47.03	65.67	45.69	109.12
cds132	5.68	3.3	6.92	3.9	5.72	5.63
cds133	57.58	24.95	25.96	25.41	17.52	23.56
cds134	95.71	79.75	43.63	70.02	47.32	47.66
cds135	55.54	25.37	36.56	19.36	10.63	27.48
cds136	627.06	526.18	250.41	110.36	87.7	105.16
cds137	70.55	19.23	34.54	25.53	14.44	14.91
cds138	29.76	7.65	20.47	23.9	8	17.71
cds139	63.43	28.63	39.55	31.7	18.5	17.35
cds14	7.02	4.72	16.34	3.56	0.66	3.57
cds140	91.29	61	70.79	39.74	25.65	55.45
cds141	182.83	122.45	112.04	24.59	17.35	70.19
cds142	12.95	12.04	9.12	21.92	11.05	18.54
cds143	34.58	22.07	23.29	36.66	12.71	27.01
cds144	388.71	280.97	216.84	127.4	96.23	135.48
cds145	369.54	249.35	201.42	96.93	43.89	126.19
cds146	23.44	9.36	13.11	8	1.67	17.65
cds147	5.23	5.57	3.6	1.09	1.41	4.33
cds148	79.98	89.5	60.16	38.82	12.52	43.13
cds149	62.97	76.37	21.84	15.3	11.4	24.02
cds15	81.92	26.91	63.39	19.93	7.41	23.75
cds150	91.65	50.46	60.23	65.39	25.95	62.08
cds151	108.83	55.35	52.98	15.41	15.5	39.68
cds152	34.79	13.37	24.72	21.69	13.73	23.32
cds153	19.38	9.68	13.64	20.3	14.27	22.64
cds154	12.01	5.01	9.86	3.87	4.84	8.34
cds155	21.88	11.33	9.33	13.83	4.52	2
cds156	211.22	193.1	142.65	44.14	35	72.84
cds157	24.2	10.23	14.75	10	11.17	14.59
cds158	7.27	4.03	14.81	7.47	5.08	11.39
cds159	2.01	1.91	2.75	1.56	0.31	4.34
cds16	73.9	45.25	65.85	21.68	24.32	17.69
cds160	22.86	26.46	8.53	31	19.58	20.06
cds161	25.5	5.78	12.06	4.46	12.88	19.1
cds162	9.32	10.84	14.42	17.98	4.46	12.71
cds163	21.44	22.5	26.53	11.46	7.29	17.89
cds164	15.5	3.69	6.66	7.88	5.38	12.22
cds165	3.41	2.34	1.5	1.53	8.55	2.43
cds166	0	0.5	0	0.94	0	0
cds167	0	0.83	0	0.5	0	0
cds168	308.29	92.97	152.85	127.03	61.1	166.54
cds169	20.58	26.2	26.04	16.72	7.79	24.1
cds17	218.17	87.1	135.15	59.02	26.31	48.59
cds170	53.2	13.21	17.22	15.7	8.82	18.97
cds171	2.42	3.45	2.67	1.76	0.43	1.05
cds172	52.98	22.12	56.32	50.81	41.64	40.14
cds173	181.93	141.12	117.22	132.98	69.87	152.35
cds174	115.38	83.87	70.2	30.1	19.08	61.59
cds175	10.46	3	2.89	3.03	2	6.59
cds176	81.56	43.78	68.32	42.13	28.84	95.41
cds177	72.08	56.84	38.75	43	30	31.64
cds178	52.54	41.51	38.45	23.5	23.82	26.76
cds179	74.08	85.37	52.56	6.64	5.77	19.48
cds18	198.01	84.05	118.33	41.85	26.48	25.65
cds180	11.67	3.7	1.49	1.12	5.23	0.45
cds181	17.05	28.91	8.51	9.89	12.96	44.53
cds182	43.95	25.87	24.47	35.64	17.41	22.55
cds183	404.72	249.98	257.96	94.2	53.14	193.06
cds184	6.78	5.68	10.23	5.43	2.5	4.83
cds185	4.08	0	6.22	0.84	0	2.91
cds186	0	0	0	0	0	0
cds187	1.12	0.44	0.7	1.3	0.4	1.58
cds188	92.58	39.46	42.27	60.84	24.3	62.57
cds189	31.29	8.49	11.48	11.03	4.33	12.12
cds19	173.85	46.45	118.91	64.37	25.4	23.44
cds190	13	7.31	13.13	7.66	2.13	8.38
cds191	76.25	32.26	38.33	30.48	22.08	21.95
cds192	168.03	64.61	74.96	45.55	29.33	122.51
cds193	40.06	17.49	11.29	12.54	3.12	14.98
cds194	17.01	2.64	6.89	10.76	5.13	5.81
cds195	0.9	1.05	0.14	1.45	0.45	0.75
cds196	35.31	17.21	16.48	18.35	14.74	19.8
cds197	12.68	3.33	9.75	9.41	0.76	8.86
cds198	39.16	26.77	34.59	38.51	22.84	32.95
cds199	31.82	15.06	14.49	8.09	3.38	8.65
cds2	84.46	53.02	58.8	35.64	11.83	33.66
cds20	1586.06	508.49	1039.59	527.48	262.33	532.58
cds200	244.96	140.86	173.84	167.49	86.08	152.08
cds201	96.57	48.41	93.04	79.66	51.64	63.97
cds202	5.75	7.12	10.08	4.27	6.24	6.58
cds203	68.53	38.58	42.14	22.8	10.3	56.51
cds204	227.75	156.84	166.39	58.43	57.35	127.43
cds205	27.82	4.54	14.19	24.87	14.59	32.03
cds206	23.97	8.92	9.97	9.31	1.84	9.09
cds207	58.81	32.56	59.29	45.18	23	42.74
cds208	18.18	2	13	8.93	6.7	12.95
cds209	58.93	34.41	54.44	90.2	28.34	84.04
cds21	24.78	18.74	24.78	22.43	16.96	26.4
cds210	53.54	32.69	27.16	37.21	37.59	46.65
cds211	22.81	9.21	12.65	18.86	15.47	14.09
cds212	69.59	39.98	21.96	32.66	21.56	85.92
cds213	3.42	7.49	5.73	4.53	8	3.08
cds214	60.71	46.5	40.71	40.15	28.12	30.79
cds215	18.28	6.88	13.98	4.61	2.62	4.01
cds216	7.66	2.02	6.97	3.54	2.16	3.46
cds217	0	0	0.98	0.46	0.37	0.5
cds218	4.03	0	0	2.42	2	1.97
cds219	438.07	248.96	222.34	170.21	118.84	209.94
cds22	30	12.14	8.52	8.72	16.79	9.16
cds220	106.49	108.75	77.68	54.98	34.67	110.83
cds221	33.24	15.63	27.53	12.47	10.5	49.67
cds222	36.27	34.06	18.99	6.52	10.71	17.21
cds223	36.08	30.8	14.7	19.93	12.85	28.21
cds224	30.2	21.04	31.82	28.48	23.14	26.55
cds225	7.39	7.16	1.13	0.51	0	1.58
cds226	24.02	10.5	16.62	30.88	15.82	18.56
cds227	0.46	0	0.02	0	0.25	0
cds228	0	0	0	0	0	0.15
cds229	28.66	6.5	11.58	12	19.91	18.99
cds23	330.12	303.8	181.59	70.58	40.57	122.45
cds230	10.03	1.95	2.5	2.36	2.92	25.79
cds231	246.44	70.65	156.55	155.62	110.92	93.54
cds232	127.38	30.79	63.72	21.27	16.29	29.16
cds233	195.11	76.03	179.59	84.15	43.69	81.29
cds234	1383	609.1	864.35	776.36	450.48	885.32
cds235	8.24	1.8	7.25	12.47	9.49	20.73
cds236	1.12	0	1.16	0.4	1.3	0.62
cds237	0.69	0.28	3.08	0.12	0	0.04
cds238	63.21	53.18	44.33	35.34	30.48	35.06
cds239	0.7	1	1.15	2.59	0.32	12.77
cds24	141.24	74.39	99.21	45.45	57.86	141.39
cds240	4.35	2	3.94	2.95	2	3.93
cds241	35.6	12.5	27.09	47.82	31.77	46.89
cds242	7.55	2	4.58	11.34	10.17	4.87
cds243	88.23	39.07	83.3	127.66	68.66	154.56
cds244	8.42	5.37	8.35	15.51	7.75	18.51
cds245	110.36	58.6	44.75	54.91	75.78	83.06
cds246	183.09	100.73	121.93	49.98	39.75	46.62
cds247	73.16	82.28	45.88	23.34	22.72	19.78
cds248	86.41	47.17	82.37	131.09	54.53	144.7
cds249	17.7	10.87	18.93	32.41	23.67	31.03
cds25	242.1	127.77	142.57	57.98	31.69	118.25
cds250	13.64	0	8.74	16.82	4.34	8.87
cds251	2.13	0	1.76	6.41	3	1.36
cds252	41.6	21.27	46.71	22.52	21.5	35.85
cds253	3.29	0.16	4.03	3.93	0.25	1.89
cds254	12.19	3	7.82	17.63	14.49	16.21
cds255	4.64	5.38	7.31	22.15	11.36	9.11
cds256	36.67	21.36	40.47	79.38	22.19	62.69
cds257	15.01	2.24	5.06	22.37	10.5	23.32
cds258	16.33	15.24	13.27	10.37	11.22	17.86
cds259	13.73	4.94	12.24	14.38	5.05	14.59
cds26	2.88	2.27	3.9	0.68	4.17	1.29
cds260	29.3	14.47	26.27	43.2	34.88	48.95
cds261	29.45	8	12.31	28.24	19.76	30.97
cds262	14	2.74	13.99	28.7	20.33	56.02
cds263	12.8	4	12.7	20.86	14.61	23.67
cds264	12.36	5.05	9.27	23.52	14.04	29.29
cds265	30.88	11.13	36.08	51.01	38.56	64.67
cds266	15.35	11.41	13.26	10.9	14.25	22.29
cds267	320.67	188.91	237.38	168.56	68.81	114.58
cds268	2406.46	1594.56	1656.27	1999.6	1118.27	2567.58
cds269	165.52	127.56	98.11	66.53	57.47	62.26
cds27	21.1	12.98	17.01	13.5	12.14	9.66
cds270	4.71	0.47	3.7	2.47	3.97	5.16
cds271	12.86	13.03	16.5	30.23	15.62	28.49
cds272	224.47	193.16	183.39	92.27	98.66	121.27
cds273	0.11	0	0.24	0.21	0.35	1.53
cds274	9.16	0	2.6	1.03	2.17	4.35
cds275	0	0	0	0.13	0	0
cds276	286.41	124.39	114.98	165.51	141.36	151.15
cds277	109.38	48.36	80.18	86.57	42.78	53.98
cds278	27.97	19.81	24.8	25.14	18.76	18.71
cds279	17.92	1.5	10.64	4.6	3.43	11.53
cds28	38	28.92	37.97	38	26.78	31.04
cds280	68.8	38.99	31.19	48	30.44	34.59
cds281	2033.37	646.57	1423.57	2037.51	1317.23	2104.44
cds282	164.96	59.15	149.71	284.54	173.75	397.89
cds283	59.91	23.03	28.79	23.47	19.92	30.53
cds284	56.2	48.04	33.76	26.96	15	53.73
cds285	1.68	0.66	4.49	2.03	1.15	1.65
cds286	1.7	0	0.79	1.38	1.82	1.46
cds287	31.82	19.9	32.56	5.51	3.17	18.58
cds288	18.38	11.93	11.58	22.63	10.42	19.34
cds289	43.69	39.3	40.51	10.64	10.15	27.64
cds29	26.63	8.14	12.63	14.71	8.09	25.25
cds290	112.27	47.4	121.01	99.45	57.33	62.82
cds291	89.45	18.42	50.28	28.31	14.52	35.73
cds292	35.43	21.26	33.44	23.72	5.25	30.43
cds293	124.47	54.61	94.53	33.55	25.79	57.71
cds294	1.54	16.88	10.24	6.75	9.53	9.19
cds295	5.06	7.06	5.05	5.26	3.91	7.63
cds296	7.37	4.52	8.62	10.59	11.9	15.58
cds297	100.2	22.94	40.61	15.79	24.6	69.71
cds298	119.43	55.38	39.88	28.41	32.04	40.86
cds299	16.02	3.04	7.54	24.53	16.06	37.39
cds3	44.4	51.63	39.8	30	52.37	43.55
cds30	42.22	23.96	28.34	22.51	16.7	34.85
cds300	2.99	0	0.52	0.41	1.48	0.25
cds301	57.08	30.6	19.29	5.08	1.77	7.78
cds302	6.96	1.46	4.02	8.82	2.4	11.28
cds303	1.08	0	0.96	0.52	0	1.69
cds304	2.53	0	0.3	0.36	1	0.85
cds305	67.64	36.5	37.89	20.75	9.28	33.79
cds306	129.16	55.95	93.37	88.01	41.08	98.4
cds307	55.72	22.65	26.88	25.63	24.43	19.99
cds308	106.95	86.24	70.61	28.68	7.43	61.27
cds309	133.22	62.51	112.45	144.65	80.7	111
cds31	11.74	6.44	5.48	8.29	1.53	10.71
cds310	19.38	19.32	23.13	9.45	6.97	8.02
cds311	108.96	107.99	74.66	60.02	30.11	101.77
cds312	31.05	25.75	27.03	20	9.93	38.22
cds313	4.77	4.38	7.01	7.86	6.91	7.71
cds314	22.74	21.95	10.85	13.83	5	25.21
cds315	35.85	36.04	10.89	6	2.93	35.35
cds316	91.02	95.21	39.04	14.66	20.39	36.14
cds317	33.67	25.32	20.38	6.66	5.41	18.69
cds318	2.37	1.73	2.74	2.22	0.72	2.08
cds319	0	0	0	0	0	0
cds32	27.78	20.03	19.18	19.29	20.9	53.9
cds320	0	0	0.04	0.14	0	0
cds321	0	0	0.5	0.37	0	0
cds322	60.06	10.57	23.6	25.28	16.44	24.34
cds323	31.53	19.29	21.49	12.53	11.26	18.8
cds324	22.14	17	19.03	19.91	10.5	22.75
cds325	0	0	0.13	0.59	0	0
cds326	79.32	71.29	87.8	25.93	15.74	44.4
cds327	21.17	10	25.64	29.62	19.5	24.61
cds328	78.81	45.5	38.92	38.58	20.5	98.58
cds329	6.43	2.72	3.88	8.27	3.33	11.51
cds33	180.21	103.72	107.6	83.88	71.09	178.26
cds330	94.18	56.5	50.24	25	9.5	36.94
cds331	30.6	11.04	15.1	30.74	16.58	12.94
cds332	15.74	2	20.09	7.19	10	15.44
cds333	2.55	0	3.52	6.32	4.14	5.83
cds334	51.07	19.23	41.7	32.56	27.62	57.72
cds335	179.37	116.81	117.65	77.23	43.72	63.49
cds336	13.01	3.44	12.8	4.41	1.1	1.41
cds337	16.78	9.28	9.91	4.72	2.87	7.46
cds338	134.46	78.25	72.46	27.35	51.48	74.74
cds339	85.7	63.8	60.64	36.86	32.35	52.39
cds34	144.54	77.47	100.66	89.03	65.55	133.2
cds340	29.76	24.66	21.89	14.26	6.25	9.82
cds341	3.76	0	3.7	3.51	4.61	2.73
cds342	94.95	51	46.37	29.84	30.31	41.06
cds343	16.14	12.02	8.79	16.51	10.41	13.21
cds344	0.54	0.26	0.89	0.8	0.98	0.41
cds345	0	0	0	0	0	0
cds346	0.03	0	0	0	0	0
cds347	15.9	13.05	5.48	2.06	0.38	8.79
cds348	28.39	16.98	23.57	26.57	21.99	28.57
cds349	19.46	16.76	21.79	22.5	12.59	9.5
cds35	92.26	54.58	47.03	24.49	20.93	48.42
cds350	228.92	148.91	156.03	137.25	129.36	153.83
cds351	54.33	16.96	20.03	32.57	15.22	38.73
cds352	91.35	32.34	38.54	14.38	7.34	18.2
cds353	45.6	21.35	32.03	16.46	7.76	32.95
cds354	38.76	34.25	27.31	12.79	12.18	23.22
cds355	68.04	33.42	65.82	77.26	39.36	95.95
cds356	346	180.66	198.13	108.71	96.23	199.69
cds357	34.75	19.17	34.86	38.93	10.63	28.07
cds358	76.02	37.13	62	48.41	48.04	86.52
cds359	133.5	62.5	96.71	101.64	64.52	120.97
cds36	48.63	67.55	28.92	15.69	7.15	31.39
cds360	511.39	428.33	280.65	222.09	160.48	346.62
cds361	6.49	6.15	4.8	4.17	1.18	4.28
cds362	21.14	4.67	33.01	8.22	13.65	68.35
cds363	256.26	188.97	132.01	76.62	42.98	122.29
cds364	48.02	40.76	32.73	35.41	13.08	35.83
cds365	15.73	2.91	9.83	6.12	5	11.68
cds366	13.53	17.92	11.52	14.27	9.32	20.22
cds367	5.28	1.52	1.98	4.72	4.76	6.76
cds368	20.85	6.5	21.08	18.65	15.21	27.55
cds369	6.02	0	4.48	1.28	0.27	3.35
cds37	25.45	15.15	15.54	7.39	14.2	13.18
cds370	0.13	0.27	0	0	0	0
cds371	69.38	63.25	61.62	13.85	10.65	40.64
cds372	7.33	1.39	5.26	1.53	3.05	6.34
cds373	67.25	24.5	40.16	26.81	34.22	19.41
cds374	4.92	3.96	9.82	7.48	6.91	24.81
cds375	43.67	46.05	66.94	44.25	21.13	56.3
cds376	307.91	184.89	149.9	126.14	68.86	128.68
cds377	95.47	98.38	75	25.09	26.06	66.94
cds378	5.09	1.12	3.59	0.47	0	2.18
cds379	90.08	30.76	27.43	22.74	31.94	14.51
cds38	0	0.47	0.59	0.13	0.06	0.12
cds380	7	1.64	10.95	5.78	1.3	5.11
cds381	64.21	49.79	57.43	67.23	49.61	139.72
cds382	125.7	70.28	66.25	70.12	37.15	81.48
cds383	80.47	53.65	55.59	42.75	18.07	45.94
cds384	103.65	37.3	48.65	14.29	12.07	44.3
cds385	88.3	58.98	47	50.3	35.7	87.47
cds386	80.42	39.98	14.75	10.51	3.7	13.4
cds387	51.13	39.42	72.83	49.25	41.78	49.12
cds388	40.05	36.08	45.31	36.5	21.44	74.07
cds389	169.29	81.01	125.36	109.55	55.7	135.97
cds39	0.75	2.77	4.8	2.43	2.65	0.72
cds390	179.5	108.47	112.9	70.3	47.9	141.26
cds391	81.46	51	53.58	68.28	29.92	69.96
cds392	0.43	0	0	0.29	3.08	0.78
cds393	54.59	35.02	21.71	17	13.84	39.57
cds394	64.85	81.07	35.28	19.88	19.05	95.11
cds395	105.47	161.41	95.42	35.74	24.49	62.25
cds396	54.39	28.66	17.04	6.71	21.31	14.4
cds397	20.49	6.06	19.04	20.53	21.64	15.75
cds398	13.73	7.63	8.71	15.5	6.87	16.65
cds399	105.12	58.69	69.43	37.61	27.25	54.34
cds4	37	13.84	19.2	10.45	10.08	12.38
cds40	22.99	39.81	25.37	24.85	9	39.39
cds400	1065.3	803	651.04	394.98	249.15	480.61
cds401	80.67	46.38	41.51	48.61	30.84	58.62
cds402	80.94	102.18	60.93	33.81	17.5	36.87
cds403	299.33	86.92	187.41	109.5	65.73	114.52
cds404	26.16	19	25.63	23.28	31.87	24.27
cds405	9.58	1	9.47	9.72	13.11	12.36
cds406	5.73	5	7.65	7.21	7.42	6.22
cds407	54.94	30.5	25.63	16.9	16.79	24.43
cds408	8.77	0	2.12	1.81	0	0.89
cds409	90.44	65.17	49.36	61.95	37.74	35.81
cds41	2.58	2.35	1.98	6.68	0	5.98
cds410	1541.88	1300.71	1017.62	603.11	417.16	1131.35
cds411	54.49	13.36	28.38	22.92	16.21	15.25
cds412	9.74	6.61	9.55	10.65	6.98	21.88
cds413	11.72	3.56	13.43	13.36	10.02	11.87
cds414	2.82	0	3.19	9.25	1.11	1
cds415	0.47	0	0.24	0	0.07	0
cds416	154.17	210.32	90.54	39.22	41.54	56.52
cds417	56.98	28.54	26.17	30.61	16.4	14.56
cds418	7.5	3.5	8.69	5.75	3.64	2.8
cds419	4	1.53	2	3.15	1	1.74
cds42	11.7	11.19	13.25	14.53	19.91	24.6
cds420	26.9	8.76	11.84	21.72	10.42	14.39
cds421	19.37	8.39	8.34	11.32	5.26	15.22
cds422	12.97	1.25	5.91	16.76	4.23	7.22
cds423	0	0	0	0.43	1.01	0.33
cds424	20.84	17.31	23.05	20.08	7.17	23
cds425	3.49	0.71	1.24	0	0.7	0
cds426	24.92	8.4	20.79	20.68	9	18.5
cds427	73.01	42.39	38.78	21.15	7.5	20.01
cds428	19.6	5.21	11.74	14.79	8.74	12.92
cds429	19.93	22.3	33.15	13.36	6.19	7.96
cds43	12.58	16.12	7.46	6.53	2.2	9.75
cds430	503.53	370.68	262.51	185.15	172.77	277.45
cds431	148.1	56.4	113.78	85.35	35.75	88.32
cds432	816.23	437.02	474.46	298.1	144.35	485.42
cds433	32.45	39.4	52.18	13.48	17.46	21.26
cds434	133	167.17	74.12	32.2	45.25	101.69
cds435	92.19	68.26	64.17	44.41	34.64	46.14
cds436	3.21	4.93	5.11	4.28	2.44	4.4
cds437	53.83	30	54.39	59.54	30.09	66.64
cds438	3.25	0	4.06	0.7	1.06	3.32
cds439	150.95	105.39	103.01	43.36	27.61	49.95
cds44	2.36	0.53	8.68	0	0	6.78
cds440	119.89	60.25	59.3	44.22	20.51	30.46
cds441	29.85	13.41	9.56	9.09	14.71	18.04
cds442	85.65	33.5	55.61	58.04	21.28	64.99
cds443	27.67	12.9	21.69	25.39	20.73	40.8
cds444	7.8	6.59	9.67	3.29	5.7	1.13
cds445	10.15	3.54	14.13	9.96	3.11	11.32
cds446	24.02	14.08	12.19	13.37	10.49	20.8
cds447	7.05	6.27	11.17	6.48	2.5	8
cds448	27.08	11.38	21.49	19.53	6.04	25.77
cds449	55.58	38.01	31.95	21.06	14.86	31.57
cds45	12.42	15.66	8.92	19.04	6.28	12.04
cds450	93.02	49.08	40.1	49.46	22.16	28.9
cds451	196.69	85.39	91.02	74.58	36.46	72.77
cds452	22.57	3.84	9.34	3.5	4	9.72
cds453	127.35	72.78	111.39	75.45	35.53	66.87
cds454	179.77	120.49	101.55	55.56	33.28	104.05
cds455	113.45	128.74	68.19	16.08	25.37	34.03
cds456	58.31	33.71	28.43	8.77	5.22	13.25
cds457	301.2	199.53	202.98	101.13	81.65	269.62
cds458	30.05	10.16	11.49	19.68	24.15	27.68
cds459	96.3	49.22	49.96	45.02	30.43	46.83
cds46	371.58	291.5	245.52	153.13	115.14	185.1
cds460	33.87	44.38	19.95	19.28	18.22	28.26
cds461	15.18	4.92	12.08	5.2	4.83	6.75
cds462	493.2	663.36	286.14	108.44	84.39	259.25
cds463	37.12	17.89	24.74	25.13	4.19	18.05
cds464	6.98	8	12.34	15.15	11	20.49
cds465	35.51	23.25	10.81	10.14	4.37	12.98
cds466	34.5	12.27	21	20.69	15.93	25.61
cds467	258.65	89.73	140.89	104.91	68.85	153.59
cds468	0	0	0	0.19	0	0
cds469	0	0	0	0	0	0
cds47	12.9	12.48	16.64	26.47	19.18	20.5
cds470	0	0	0	0	0	0
cds471	0	0	0	0	0	0
cds472	0	0	0	0	0	0
cds473	0	0	0	0	0	0
cds474	0	0	0	0	0	0
cds475	0	0	0	0	0	0
cds476	0	0	0	0	0	0
cds477	0	0	0	0	0	0
cds478	0	0	0	0	0	0
cds479	0	0	0	0	0	0.17
cds48	57.57	22.41	14.09	16.59	9.09	14.16
cds480	1.12	0	0	3.98	0.93	0.54
cds481	9.46	0	6.84	12.65	8.88	15.96
cds482	10.14	4.83	6.15	8.43	1.57	10.77
cds483	0	0	0	0	0	0.88
cds484	0	0	0.1	0	0	0
cds485	2.58	1	1.39	3.27	1	0.33
cds486	15.1	4.07	17.22	12.59	13.43	17.34
cds487	226.05	208.28	131.11	57.85	24.18	180.28
cds488	38.57	26.26	21.65	15.52	13.44	10.83
cds489	16.93	10.5	10	12.45	7.82	10.86
cds49	24.23	12.71	16.38	5.81	4.87	3.19
cds490	21.05	6.55	15.25	8.69	4.31	9.58
cds491	0.24	0.76	0	0.96	1.24	1.18
cds492	42.13	19.6	29.84	9.29	10.21	13.45
cds493	51.41	23.45	46.1	26.57	9.51	12.91
cds494	91.62	25.43	62.23	50.87	20.4	64.66
cds495	237.25	144.86	151.11	143.57	94.15	170.98
cds496	79.93	23.3	29.41	8.87	13.06	30.29
cds497	54.58	34.87	51.18	35.6	19.34	40.57
cds498	24.64	24.93	27.49	3	1	11.7
cds499	0	0	0.05	0	0	0.06
cds5	131.88	53.37	89.16	75.91	31.14	98.55
cds50	55.04	22.91	44.42	23.28	12.21	35.89
cds500	1.31	0.3	1.57	0.31	0	0
cds501	33.32	7.66	15.99	15.17	13.27	23.95
cds502	0.5	0	1.71	0.32	0.96	4.41
cds503	40.89	25.73	19.66	14.77	11.19	15.69
cds504	54.75	32.22	30.93	29.54	14.02	42.82
cds505	145.32	107.63	89.97	70.44	67.9	90.27
cds506	22.47	21.01	14.82	30.13	28.62	44.36
cds507	15.65	3.61	7.68	11.81	5.4	5.07
cds508	3.01	0	0	0.26	0	0.64
cds509	44.88	21.13	34.53	27.35	25.89	42.73
cds51	67.75	41.71	43.27	61.74	42.12	66.11
cds510	147.45	83.08	121.06	96.29	62.9	115.28
cds511	162.79	69.98	92.67	48.87	28.2	42.84
cds512	98.14	55.92	84.04	25.99	23.11	24.83
cds513	66.66	37.08	30.74	16.43	7.32	11.1
cds514	10.48	15.32	0.33	1	4.47	4.35
cds515	0	0.2	0.56	0	0	0.44
cds516	0.28	0	0.03	0.19	0	0
cds517	13.96	9.69	16.99	14.01	11.81	7.93
cds518	64.18	49.34	32.64	14.41	11.73	20.3
cds519	166.81	66.33	68.42	30.77	22.14	110.74
cds52	68.89	51.81	70.36	76.35	42.61	89.73
cds520	90.91	47.98	59.74	55.52	29.45	35.2
cds521	14.35	3.5	22.65	9.31	5.83	23.43
cds522	261.98	220.18	176.66	99.12	94.64	220.48
cds523	3.5	1.04	2.76	4.03	1.01	1.35
cds524	7.74	0	2.44	5.42	5.39	5.37
cds525	1.65	0.3	0.2	4.28	0.03	0.26
cds526	5.88	13.01	1.51	5.42	1.79	3.05
cds527	7.5	8	10.23	10.22	10.08	14
cds528	3.54	2.99	3.4	2.65	2.65	3.34
cds529	6.22	17.15	6.65	4.75	5.66	5.53
cds53	0.26	0	0.86	0	0	0
cds530	23.42	4.91	21.54	16.86	5.16	21.53
cds531	10.75	3.89	8.19	14.37	3.83	11.58
cds532	15.69	1.12	6.82	5.96	3.7	11.17
cds533	50.87	25.57	42.94	39.27	27.23	56.75
cds534	11.3	6.47	6.56	18.86	2.24	18.48
cds535	41.63	32.75	35.69	12.58	15.86	17.39
cds536	56.26	71.95	48.06	35.41	21.44	65.52
cds537	4.55	4.46	7.54	11.11	11.89	10.05
cds538	17.05	12.48	21.4	41.55	9.77	32.33
cds539	6.8	2.64	13.88	7.1	3.54	18.1
cds54	0	0	0	0	0	0
cds540	16.87	5.31	18.07	23.48	18.12	37.22
cds541	3.02	0.64	4.86	0.57	1.87	5.11
cds542	28.81	8.31	21.32	18.65	22.34	28.2
cds543	30.61	25.71	33.51	42.17	15.61	39.44
cds544	16.06	16.89	5.48	17.19	6.08	17.14
cds545	22.46	17.12	40.29	45.65	24.05	40.19
cds546	15.09	3.19	7.94	10.87	11.18	6.93
cds547	2.11	3.57	8.71	6.21	2.87	5.86
cds548	14.83	7.5	17.25	8.94	1.55	12.83
cds549	0.26	0	1.12	1.19	0.17	2.06
cds55	4.6	0.9	1.07	2.78	1.1	0.9
cds550	4.5	1	6.8	7.42	7.04	14.31
cds551	12.9	2	5.81	8.84	13.48	10.9
cds552	4.66	5	1.36	3	3.38	2.3
cds553	43.35	96.38	27.49	21.52	11.17	25.79
cds554	28.19	9.64	32.29	20.86	11.47	34.84
cds555	2.95	2.35	7.52	5.03	4.74	9.43
cds556	28.89	4.44	35.16	33.58	21.31	44.48
cds557	72.39	37.15	60.47	80.6	49.48	99.53
cds558	2.02	0.58	0.4	3.76	1.6	3.2
cds559	603.32	398.45	249.34	113.84	97.07	177.61
cds56	198.74	158.58	104.58	104.33	61.7	202.82
cds560	141.37	83.93	61.46	55.8	21.12	36.24
cds561	97.89	44.55	67.35	75.32	43.95	81.7
cds562	18.57	2	8.02	32.47	14.04	23.34
cds563	2.53	15.18	2.71	5.51	1.67	4.32
cds564	24.88	8.05	24.43	24.56	13.54	34.53
cds565	12.53	3.1	4.23	13.33	4.54	8.79
cds566	0.96	0	0.62	2.03	0.04	0
cds567	2	0	2	2.5	0.68	5.67
cds568	21.24	25.15	13.2	4.39	4.39	7.84
cds569	71.99	25.75	58.09	73.81	36.68	86.81
cds57	157.88	75.16	119.51	55.66	55.1	34.14
cds570	112.65	48.82	66.25	34.92	32.91	47.94
cds571	8.65	1.1	9.22	18.97	7.95	10.21
cds572	780.08	552.95	390.85	454.58	340.95	587.78
cds573	321.56	122.24	146.49	125.46	41.37	71.43
cds574	210.84	45.33	81.36	61.99	47.01	39.15
cds575	68.3	40.49	34.05	49.36	8.5	19.18
cds576	41.18	23.37	28.15	17.6	11.36	34.4
cds577	20.84	22.77	18.19	8.41	6.7	8.05
cds578	54.62	18	31.49	29.04	18.36	29.17
cds579	40.29	8.55	16.48	14.64	24.77	49.3
cds58	234.77	120.42	108.44	33.14	27.54	21.18
cds580	39	5.05	11.7	23.31	10.33	14.67
cds581	24.54	5.61	18.6	8.97	2.48	15.1
cds582	29.36	6	15.29	16.27	14.9	14.02
cds583	43.11	29.45	24.89	32.63	16.25	43.24
cds584	28.92	5.04	22.31	44.51	32.62	33.49
cds585	18.27	2.18	7.71	18.39	13.79	12.82
cds586	26.73	10.63	23.63	5	7	22.39
cds587	121.7	88.68	95.65	66.68	48.18	101.58
cds588	17.64	12.66	11.94	6.03	5.07	14.4
cds589	245.88	139.42	131.07	112.04	49.46	173.48
cds59	558.19	299.74	258.33	112.14	104.19	128.3
cds590	739.75	323.9	432.3	896.88	647.46	863.02
cds591	257.55	181.59	150.05	154.45	143.17	257.35
cds592	1940.79	1180.45	1399.68	1109.61	701.41	1432.6
cds593	43.79	33.91	44.19	43.66	26.71	51.57
cds594	6.24	8.92	11.52	21.49	12.51	23.92
cds595	15.52	2	19.95	26.49	16.77	25.96
cds596	20.06	6.83	25.96	30.55	15.31	30.52
cds597	25.5	19.05	31.51	44.08	26.99	46.99
cds598	16.53	24.35	14.89	30.2	26.71	47.5
cds599	14.36	5.87	8.16	15.2	6.48	17.9
cds6	25.44	13.43	32.44	21.22	11.83	27.34
cds60	270.04	201.47	139.02	71.4	74.84	60.51
cds600	8.78	6.89	8.95	9.88	8.92	9.2
cds601	34.04	10.86	10.97	20.12	22.14	28.25
cds602	26.58	11.35	6.14	17.57	10.82	23.43
cds603	9.41	6.3	15.89	13.16	9.9	29
cds604	1.1	1.19	4.34	4.23	0.79	6.57
cds605	1.95	1.14	1.92	2.36	0.05	0.8
cds606	0	0	0.46	0.97	0	0
cds607	1.76	0	1	0	3.6	1
cds608	13.33	4	4.58	12.53	7.84	11.21
cds609	51.97	28.6	39.69	42.43	18	56.3
cds61	46.33	21.9	35.16	18.92	10.63	26.04
cds610	316.75	241.23	163.58	33.24	25.13	115.58
cds611	226.74	202.89	154.33	43.39	35.49	161.54
cds612	18.06	20.5	16.9	9.49	10.96	13.53
cds613	55.67	26.34	53.26	26.55	10.18	49.52
cds614	329.88	287.37	218.01	97.17	47.19	188.42
cds615	253.86	101.23	160.97	107.66	56.76	108.52
cds616	68.42	65.84	34.25	18.94	9.86	18.36
cds617	20.04	11.94	25.38	4.69	2.18	3.41
cds618	146.45	76.35	91.65	51.66	15.37	67.46
cds619	331.81	124.79	154.17	77.03	21.04	85.95
cds62	12.34	17.54	8.48	16.23	6.03	17.08
cds620	223.79	182.78	156.76	60.51	35.83	71.87
cds621	797.77	669.37	419.7	208.06	166.56	448.95
cds622	33.92	13.82	28.41	27.21	16.72	26.3
cds623	70.03	30.5	30.61	33.19	21.69	24.21
cds624	86.96	28.31	55.36	36.73	18.69	5.62
cds625	68.24	19.51	55.69	50.78	14.9	24.42
cds626	41.6	12.98	42.69	24.69	16.81	20.25
cds627	85.62	43.31	65.74	29.32	33.69	25.31
cds628	92.16	24.65	45.43	6.88	7.01	12.2
cds629	42.73	17.88	31.06	2.97	3.06	8.26
cds63	1.27	1.22	5.05	2.62	0	0.56
cds630	54.63	23.16	42.3	17.03	8.14	8.02
cds631	110.65	41.35	68.31	23.89	12.5	20.3
cds632	142.03	91.72	81.28	44	24.67	45.87
cds633	85.05	51.07	53.24	14.53	12.02	42.61
cds634	93.9	52.89	45.16	22.72	15.07	18.58
cds635	237.76	154.39	158.51	55.94	37.63	168.14
cds636	143.43	67.3	97.12	32.58	20.71	42.54
cds637	94.26	34.38	58.35	12.13	4.86	18.72
cds638	121.8	72.68	70.29	8.73	8.03	10.05
cds639	337.63	237	266	148.94	96.61	185.89
cds64	57.59	46	49.12	51.23	26.89	54.63
cds640	87.41	11.14	36.37	4.8	4.82	11.48
cds641	88.56	42.64	58.41	26.07	33.94	9.76
cds642	99.07	82.07	101.48	44.18	15.93	76.06
cds643	86.23	44.9	69.1	23.74	17.16	29.6
cds644	617.02	331.02	371.88	178.56	145.67	343.44
cds645	56.94	18.75	39.13	19.06	10.01	15.37
cds646	341.28	182.79	205.57	240.94	145.41	378.73
cds647	118.03	87.69	85.76	29.27	18.76	83.65
cds648	44.88	26.4	30.57	37.54	26.5	41.12
cds649	218.18	183.39	132.5	84.78	66.92	117.97
cds65	1.03	0	0	2.26	1.21	1.15
cds650	438.04	245.5	208.74	209.34	129.61	219.74
cds651	22.31	17.85	22.23	19.52	4.55	19.38
cds652	0.06	0	0	0	0	0.05
cds653	1.39	0	0.61	0.07	0.52	0.33
cds654	20.66	22	6.94	6.42	7.44	23.1
cds655	97.53	67.55	88.97	61.57	31	108.76
cds656	26.12	19.09	22.18	31.42	28.84	43.03
cds657	4.18	0	3.78	0.12	4.35	5.24
cds658	6.65	4.01	10.5	9.47	7.87	19.45
cds659	7.56	17	10	19.33	11.74	18.47
cds66	80.52	21.33	41.75	57.34	34.41	80.15
cds660	11.57	6.78	8.28	16.3	10.28	8.08
cds661	28.54	7.12	17.19	16.76	11.01	21.85
cds662	580.6	262.94	235.32	198.71	176.65	186.91
cds663	15.41	8.86	5.72	3.69	0.75	0.73
cds664	54.46	27.45	32.2	18.37	28.35	40.48
cds665	185.46	144.82	94.57	82.04	49.79	254.37
cds666	41.75	17.34	15.48	21.81	10.91	17.59
cds667	34.21	3	19.96	26.71	32.42	42.84
cds668	68.11	38.56	26	27.46	21.75	46.9
cds669	28.88	16.69	22.64	13.77	9.47	14.5
cds67	6.26	1.38	4.18	2.96	1.45	5.05
cds670	165.42	187.53	96.97	61.51	47.74	82.56
cds671	23.77	15.76	23.3	29.12	27.11	34.48
cds672	8.48	3.06	5.95	4.99	1.35	3.11
cds673	65.29	56.23	45.39	31.92	26.96	32.51
cds674	24.36	6.67	16.98	11.31	11.23	45.74
cds675	1.17	0	3.66	3.71	2.04	2.3
cds676	0.31	0.87	1.48	0.89	2.2	0
cds677	30.07	25.95	41.27	33.4	31.78	48.77
cds678	25.02	9.84	25.08	21.24	11.72	20.14
cds679	18.78	11.52	16.79	29.74	11.42	18.73
cds68	32.1	10.78	19.34	6.99	3.2	10.17
cds680	1719.41	942.54	844.29	1099.28	848.47	1549.64
cds681	604.97	434.57	329.72	132.6	74.1	174.54
cds682	14.97	6.48	16.24	9.49	3.65	16.61
cds683	0.62	1.29	0	0.26	0	0
cds684	2.48	0.57	2	0	0.42	0.77
cds685	96.48	53	43.4	39.92	27.8	12.94
cds686	39.83	14.77	14.91	6.79	3.14	13.04
cds687	102.49	36.14	51.24	35.08	13.96	53.78
cds688	88.22	33.12	28.91	26.76	8.46	26.38
cds689	29.53	28	24.47	12.8	8.5	33.42
cds69	15.16	8.48	14.84	13.23	12.24	26.52
cds690	69.79	13.38	48.66	85.59	48.78	121.91
cds691	30.04	19.11	26.83	32.75	32.35	35.66
cds692	52.76	15.43	38.59	16.53	8.51	19.03
cds693	46.14	17.96	29.72	27	13.5	21.43
cds694	54.56	57.98	20.46	34.08	12.54	44.04
cds695	98.74	57.82	52.68	56.58	29.1	46.61
cds696	210.39	139.78	107.51	152.46	100.18	167.8
cds697	6.88	6.77	9.86	3.22	5.68	3.93
cds698	122.46	87.61	79.66	76.71	37.21	119.81
cds699	33.09	28.16	35.64	32.67	23	33.23
cds7	60.34	32.71	38.02	45.65	39.81	61.3
cds70	0	0	0	0	0	0
cds700	87.44	73.07	58.5	18.82	29.4	42.13
cds701	66.79	42.69	59.65	31.54	26.94	41.14
cds702	841.58	314.87	487.47	388.81	308.7	526.3
cds703	11.45	8	8.19	9.73	8.79	13.3
cds704	1	1.79	0.84	3.18	2.44	1.76
cds705	0.63	4.55	3.02	2.35	1.72	6.97
cds706	163.65	90.58	77.14	45.61	39.19	110.71
cds707	100.91	52.43	57.97	70.84	48	52.82
cds708	9.71	9.67	11.82	5.58	10.15	12.56
cds709	5.3	1.21	1.23	2.1	1.79	2.59
cds71	0	0	0	0	0	0
cds710	605.14	492.32	357.16	189.68	167.08	369.75
cds711	75.37	24.9	51.07	53.24	26.9	98.61
cds712	158.77	92.85	80.9	79.45	50.72	125.99
cds713	27.85	18.57	34.2	17.28	5.65	63.1
cds714	81.52	45.11	33.08	20.12	7.07	17.46
cds715	10.67	4.09	11.98	5.99	3.01	5.38
cds716	115.38	81.55	71.15	57.35	38.29	80.16
cds717	97.16	46.25	50.48	58.77	33.02	34.24
cds718	47.14	19.66	32.49	23.36	9.54	12.76
cds719	13.98	11.21	13.95	11.36	18.58	7.64
cds72	0.15	0.62	0.49	0.19	0	0.56
cds720	13.11	13.08	4.97	8.73	8.31	25.07
cds721	16.96	21	11.59	1	1.72	2
cds722	13.26	6.9	13	16.61	13.61	29.78
cds723	23.99	10.36	20.23	11.19	7.65	29.92
cds724	25.15	18.07	27.67	25.21	8.76	43.29
cds725	39.98	19.6	31.66	39.23	17.52	43.68
cds726	12.46	9	19.7	15.81	6	26.56
cds727	7.9	6	9.5	7.38	2.2	8.06
cds728	22.07	3.5	11.67	15.46	12.88	37.4
cds729	64.99	56.13	30.99	20.08	18.32	83.73
cds73	75.42	40.13	36.12	39.78	20.22	25.68
cds730	25.75	9.14	21.52	16.36	15.33	22.13
cds731	59.82	27.27	68.73	73.62	36.07	79.95
cds732	62.07	29.83	30.56	34.98	14.68	22.48
cds733	111.23	48.81	94.42	88.37	51.13	86.77
cds734	227.88	157.73	169.92	51.3	34.69	119.44
cds735	49.06	21.99	34.36	12.08	4.59	10.1
cds736	58.79	28.71	28.83	12.97	1.48	6.62
cds737	2.87	1.43	3.07	0.39	0	0
cds738	44.27	26.94	29.61	30.64	17.35	34.21
cds739	8.96	3.66	5	11.76	5.09	6.4
cds74	8.15	28.7	6.7	7.9	5.6	7.08
cds740	54.99	29.18	26.77	27.51	12.25	20.9
cds741	16.92	11.5	7.77	9.71	7.38	10.3
cds742	115.79	92.81	42.86	51.79	41.92	35.75
cds743	106.62	45.5	66.9	64.39	41.06	72.51
cds744	2.47	2.63	0.99	0	2.61	1.74
cds745	12.12	6.98	9.44	2.5	4.61	3
cds746	395.83	257.03	191.84	119.72	80.83	249.42
cds747	36.2	35.92	43.97	8.7	8.74	40.64
cds748	73.76	40.5	54.78	50.87	30.89	83
cds749	607.11	264.39	320.21	158.73	106.63	311.31
cds75	28.65	19.5	7.2	9.49	4.33	13.59
cds750	141.52	67.09	79.82	26.25	10.42	72.58
cds751	85.71	51.3	59.56	75.16	38.7	147.17
cds752	59.64	26.94	20.22	19.52	6.19	20.5
cds753	14.11	6.67	12.93	17.48	7.27	8.72
cds754	32.33	46.17	22.72	10.27	10.56	45.52
cds755	18.68	8.5	21.5	25.92	14.44	18.6
cds756	56.95	33	24.98	36.74	31.11	30.85
cds757	11.16	7.94	25.93	20.04	14.91	40.15
cds758	107.62	53.45	72.53	86.69	49.65	75.49
cds759	5.87	1.12	5.86	1.04	7.81	4.84
cds76	43.01	36.07	39.05	36	34.67	37.76
cds760	25.55	19	15.27	14.94	15.78	20.12
cds761	48.31	16.69	29.93	17.14	10.23	22.88
cds762	5.81	7.79	8.28	3.44	0.16	8.48
cds763	4.66	10.39	12.31	1	5.72	8
cds764	15.45	8.77	15.11	3.35	8.32	4.31
cds765	217.36	111.4	108.19	78.67	43.86	154.32
cds766	7.23	1.61	8.78	11.61	6.5	9.32
cds767	3.1	5	2.87	6.03	1.57	6.13
cds768	37.59	7.58	24.38	36.41	24.19	61.07
cds769	3.24	3.12	1.81	1.46	1.53	2.51
cds77	0	0	0	0	0	0
cds770	3.87	0	0.95	3.78	1.01	7.63
cds771	57.15	66.77	36.6	64.48	24.69	37.62
cds772	74.02	34.04	31.08	16.87	16.46	18.76
cds773	207.99	130.57	213.25	255.25	186	250.87
cds774	25.17	23.63	10.72	7.01	6.85	38.1
cds775	159.95	84.5	139.78	32.02	18.4	73.43
cds776	68.97	17.83	80.86	22.62	9.85	17.25
cds777	119.7	79.01	108.12	50.4	40.48	55.26
cds778	7.08	7.52	2.55	10.45	3.8	13.72
cds779	282.69	129.88	141.63	67.51	44.17	131.04
cds78	9.25	10.79	9.39	6.07	1.45	8.77
cds780	4654.17	3028.3	2305.53	3487.12	2381.16	4586.48
cds781	7279.23	3504.92	4647.49	7042.91	4251.25	8269.96
cds782	70.97	50.62	62.55	52.79	35.7	67.47
cds783	5.27	0.45	0.95	5.03	4.58	1.57
cds784	17.76	2.57	10.51	19.57	7.02	10.26
cds785	5.13	2.95	2.77	5.03	3.44	7.26
cds786	3.22	1	0.91	0.53	1	0.47
cds787	33.85	6	9.57	9.91	2.12	7.59
cds788	114.78	20.94	40.39	21.59	10.97	23.25
cds789	4.96	3.22	1.38	1.51	2.95	0.79
cds79	200.1	108.08	99.68	75.37	45.64	84.85
cds790	131.32	96.5	84.57	40.14	41.84	51.67
cds791	22.05	0	5.21	4.64	7.05	7.85
cds792	0.53	1.16	2.76	1.06	1.19	0.04
cds793	17.99	10.59	10.1	16.51	7.99	4.5
cds794	160.11	110.6	72.56	22.96	13.23	47.99
cds795	182.54	55.17	109.31	120.5	70.64	121.5
cds796	125.8	62.52	111.41	89.98	46	93.16
cds797	75.52	39.58	57.51	80.25	33.92	126.09
cds798	215.19	90.54	158.27	153.84	77.68	136.44
cds799	140.07	91.44	124.23	81.82	68.78	63.35
cds8	134.64	68.91	105.48	202.06	125.45	179.91
cds80	30	17.96	26.82	18.65	8.5	18.5
cds800	24.51	12.12	24.04	13.72	9.6	7.19
cds801	72.45	64.5	50.7	35.77	14.64	48.88
cds802	0.18	0	0	0.06	0	0
cds803	53.09	41.54	56.97	55.93	20.5	69.76
cds804	31.34	39.24	39.61	28.07	8.21	69.97
cds805	242.24	188.44	137.44	55.12	65.43	114.99
cds806	256.83	198.98	146.09	54.07	69	139.33
cds807	39.86	36.17	37	19.89	16.25	33.57
cds808	45.71	18	33.22	29.51	14.7	36.74
cds809	2.99	0.94	0.65	1.75	1.36	1.73
cds81	26.26	32.31	16.41	10.07	11.31	14.66
cds810	157.45	156.21	105.57	59.98	52.47	106.94
cds811	115.92	96.75	66.5	51.68	22.36	73.76
cds812	175.68	100.97	95.09	18.83	40.7	59.43
cds813	178.81	188.11	139.1	18.51	18.53	58.77
cds814	92.22	42.73	47.85	50.53	43.7	107.72
cds815	0.97	0.21	0	0.39	0.47	0.85
cds816	0	0	0	0	0	0
cds817	4.82	3.54	3.61	4.46	6.66	10.34
cds818	1.43	1.7	2.09	2.3	2.05	4.33
cds819	1.5	0	2.25	0.56	0.62	3.41
cds82	21.96	8.5	22.54	26.93	9.5	28.57
cds820	0.13	0	0.43	0.19	0	0.99
cds821	29.46	21.9	13.7	15.43	10.31	14.55
cds822	156.95	118.12	102.75	82.32	29.25	75.28
cds823	310.23	204.81	131.86	214.6	102.64	207.95
cds824	11.7	10.5	16.86	16.65	6.9	17.26
cds825	24.42	21.34	27.96	50.18	26.69	50.46
cds826	19.52	5.21	19.34	17.52	7.15	14.49
cds827	22.76	16.28	18.8	22.58	8.41	23.03
cds828	10.27	7.49	5.51	7.1	6.1	3.57
cds829	77.3	39.04	73.78	66.22	37.61	52.27
cds83	15.49	19.05	11.72	8.95	6.01	11.16
cds830	61.19	27.34	50.42	70.02	25.8	56.13
cds831	519.09	490.13	297.24	403.74	313.97	497.4
cds832	169.64	101.12	110.89	93.43	63.77	105.9
cds833	51.91	14.71	19.57	8.78	5.72	16.02
cds834	93.77	20.66	74.81	21.57	18.65	43.37
cds835	54.22	25.75	61.81	26.49	21.57	24.08
cds836	51.74	24.2	40.44	24.76	35.08	31.82
cds837	117.37	74.62	76.99	48.82	45.27	36.16
cds838	165.51	250.74	69.71	30.41	21.18	85.41
cds839	6.69	11.33	14.72	2.42	0.66	3.54
cds84	125.06	66.68	84.69	39.44	28.78	86.84
cds840	4.73	1.69	5.74	1.73	1.53	4
cds841	0	0.48	0	0.16	0	1.74
cds842	0	0	0	0	0	0
cds843	0	0	0	0	0	0
cds844	0	0	0	0	0	0
cds845	2.24	0	0.63	0.56	0	1.05
cds846	193.21	200.01	88.58	92.95	80.09	89.57
cds847	344.17	353.71	156.41	198.9	178.75	204.93
cds848	542.88	218.89	305.86	234.37	167.96	273.74
cds849	11.34	0	0.78	3.9	1.32	0.93
cds85	30.1	3.64	9.29	11.72	6.18	15.42
cds850	6.92	6.02	6.51	10.6	8.05	13.01
cds851	3.39	0	1.22	1.04	0.05	2.12
cds852	0.76	0.3	0.99	0.19	0	1.34
cds853	0.39	0	0.55	0.61	0	3.61
cds854	65.48	42.59	34.75	53.41	33.1	57.8
cds855	141.83	57	87.23	102.77	55.41	142.03
cds856	62.95	39.47	46.04	67.78	70.18	35.51
cds857	207.51	96.76	149.45	113.82	60.89	148.57
cds858	5.64	3.85	2.52	3.42	14.91	7.75
cds859	3.36	0	1.48	3.19	1.39	2.36
cds86	8.99	3	6.25	10	2.5	18.82
cds860	0.05	0	0.82	0.32	0.82	0.22
cds861	9.06	1.8	5.44	7.8	3.78	5.68
cds862	307.97	178.35	157.44	157.02	118.2	149.6
cds863	17.77	19	14.66	32.95	11.45	42.34
cds864	81.08	34.68	61.67	36.03	31.73	49.66
cds865	7.39	5.85	15.85	0.36	2.82	5.6
cds866	289.17	141.23	238.65	199.57	147.08	384.21
cds867	141.71	93.61	79.05	51.17	26.17	59.6
cds868	222.41	220.42	215.19	49.57	31.85	151.63
cds869	128.67	153.89	82.85	20.81	20.83	59.12
cds87	46.68	10.75	21.11	33.02	10.45	22.28
cds870	3.45	1.2	1.6	3.14	0.12	9.03
cds871	8	0.48	1.1	3.75	2.73	1.41
cds872	6.08	0.65	2.2	1.25	1.98	0.85
cds873	1.36	1	0	1.5	3.04	0
cds874	7	1	3	7.09	6.91	13.93
cds875	17.04	5.01	4.19	5.4	1.53	10.29
cds876	17.87	1.92	18.67	14.58	8	15.44
cds877	0.5	0	2.65	1.87	0.32	0.44
cds878	1.61	5	4.19	2.13	2.09	4.26
cds879	146.09	132.25	89.71	84.29	51.11	84.88
cds88	11.91	8.44	5.39	6.72	1.65	2.74
cds880	36.16	46.22	40.54	29.17	24.99	88.19
cds881	0.95	0.96	0	1.84	2.12	0
cds882	0	0	0	1	0	0
cds883	0.5	0	2	0	0	0
cds884	0	0	0	0	0	0.9
cds885	0.42	0	1.88	0.2	0	0.18
cds886	59.08	24.29	43.42	40.79	19.55	26.68
cds887	75.08	33.17	31.68	29.63	19.29	15.18
cds888	1549.85	975.48	721.49	1232.08	891.72	1115.91
cds889	20.5	2.26	12.69	6.82	4.17	9.87
cds89	6.61	2.78	7.95	8.28	5.04	7.63
cds890	23.5	2.06	15.42	6.73	7.27	3.09
cds891	66.02	65.58	47.77	45.98	30.67	47.81
cds892	96.7	51.93	73	16	9	67.33
cds893	6.28	1.24	1.79	3.97	2.21	3.76
cds894	11.98	7.16	5.37	7.79	7.84	12.1
cds895	75.5	42.79	56.8	48.22	24.38	39.83
cds896	176.59	76.55	84.87	75.84	44.58	102.53
cds897	2.21	1.35	1.21	0.01	0.6	0.84
cds898	17.85	20.29	20.57	15.99	9.21	19.08
cds899	37.49	8.4	15.23	13.07	10.95	7.6
cds9	47.39	17.06	39.95	28.66	14.85	36.38
cds90	3.78	5.19	2	2	4.65	6
cds900	18.68	14.06	18.6	10.23	2.56	7.66
cds901	0.92	0.11	7.91	4.58	5	4.48
cds902	158.26	60.47	124.53	89.78	42.6	88.77
cds903	1.15	2.63	3.01	1.19	2.34	4.9
cds904	54.74	39.2	19.79	28.73	11.2	24.8
cds905	8.72	4.95	13.14	8.98	7.16	9.84
cds906	122.13	43.41	86.67	96.14	45.31	81.27
cds907	106.26	45.69	85.29	127.19	53.57	102.36
cds908	43.52	23.49	19.82	30.17	10.88	17.32
cds909	14.1	11.4	15.52	18.67	5.85	18.69
cds91	53.04	17.26	71.67	52.9	30.15	60.65
cds910	0.86	1.89	6.71	1.9	2	3.82
cds911	4.79	1.29	1.85	3.32	1.79	1.23
cds912	10.09	2.4	8.69	4.54	3.58	3.22
cds913	63.16	57.67	47.36	61.11	37.19	60.18
cds914	105.68	65.47	89.17	74.75	20.48	69.26
cds915	29.27	11.56	23.3	11.29	14.46	40.8
cds916	203.33	82.14	76.23	85.95	45.45	128.7
cds917	8.1	4.52	3.67	5.13	2	0.87
cds918	117.63	89.03	57.32	22.11	7.77	34.04
cds919	28.05	20.9	24.2	31.41	18.27	38.88
cds92	144.22	43.15	92.6	88.5	58.17	95.09
cds920	58.04	23.56	28.59	38.68	22.47	55.77
cds921	67.65	92.65	31.88	20.6	16.54	13.54
cds922	16.82	25.41	8.11	25.6	11	14.2
cds923	261.49	251.66	162.03	142.26	68.3	199.67
cds924	273.67	160.35	153.86	83.16	52.92	157.82
cds925	15.13	18.72	18.32	9.19	6.13	7.26
cds926	13.3	6	7.75	6.05	8.69	11.94
cds927	362.21	214.96	223.79	211	161.62	242.09
cds928	71.75	80.38	54.63	27.97	13.1	58.97
cds929	6.67	7	9	1	5.24	2.87
cds93	109.85	61.74	29.38	17.48	17.91	10.23
cds930	0.7	0	0	0	0.5	0
cds931	0.93	0.3	0.09	0.41	0.72	0
cds932	40.19	37.57	33.72	31.71	13.69	16.45
cds933	241.69	221.63	183.38	154.98	78.63	117.55
cds934	172.23	53.69	112.07	116.36	59.07	144.13
cds935	35.56	21.71	21.2	6.83	5.16	4.36
cds936	16.19	16.54	8.61	19.34	6.2	6.23
cds937	35.17	8.13	18.72	33.94	16.61	21.01
cds938	156.02	86.73	109.74	58.01	19.79	104.67
cds939	42.41	24.64	42.68	36.46	27.33	49.21
cds94	22.55	24.44	6.42	6.63	2.18	13.38
cds940	1.1	0	0	0	0	1.25
cds941	0	0	1	0	0	0.58
cds942	2.5	6	7.6	6.05	6	5.08
cds943	29.62	22.4	39.78	43.18	20.49	37.67
cds944	45.2	36.22	35.68	21.48	10.36	94.13
cds945	643.05	469.51	374.86	396.17	283.76	569.56
cds946	25.55	14	32.57	33.27	14	37.37
cds947	100.37	86.08	120.94	105.03	59.56	118.71
cds948	31.04	12.57	13.05	4.69	8.73	21.2
cds949	59.13	33.42	20.49	38.52	12.4	17.98
cds95	5.29	5.95	3.92	5.45	4.04	18.66
cds950	42.06	6.16	24.82	42.9	16.05	37.7
cds951	39.97	18.71	38.72	35.34	8.61	43.15
cds952	208.62	202.8	126.06	98.51	69.32	192.07
cds953	22.02	20.79	16	9.31	6	18.71
cds954	23.21	10.86	11.45	25.34	13.48	16.96
cds955	24.57	14.6	23.18	33.83	28.7	44.63
cds956	27.55	36.33	26.81	8.52	0.83	22.85
cds957	32.4	11.79	20.31	6.72	5.49	14.17
cds958	22.02	13.01	16.15	22.82	17.42	7.56
cds959	2.8	0	5.25	2.36	0	3.94
cds96	313.02	299.7	163.61	142.01	110.93	180.29
cds960	151.75	92.01	101.21	27.23	33.62	61.37
cds961	217.45	162.32	129.6	80.18	44.57	87.68
cds962	99.13	39.88	40.93	20.03	12.27	34.33
cds963	68.37	48.09	22.15	19.34	25.85	10.75
cds964	10.96	5.49	3.44	3.32	0.88	1
cds965	0.75	0.47	0.49	0.97	0.5	0
cds966	27.01	15.81	16.43	19.31	9.86	22.97
cds967	33.04	11.79	24.78	17.93	6.87	20.02
cds968	134.44	72.12	115.96	90.52	68.84	92.3
cds969	14.24	4.55	15.91	0	0	10.82
cds97	321.95	202.81	260.51	89.17	75.47	230.74
cds970	59.35	50.73	42.75	34.73	40.51	24.95
cds971	118.95	54.99	56.45	36.19	37.34	55.42
cds972	83.49	34.54	57.44	49.07	30.59	45.12
cds973	98.2	39.45	43.95	34.35	26.22	61.47
cds974	51	25.41	27.18	41.25	22.85	59.75
cds975	35.37	18	39.5	65.6	51.05	55.5
cds976	40.62	39.08	17.03	10.17	13.56	15.14
cds977	268.56	135.13	155.99	159.81	76.84	228.35
cds978	10.93	4.63	9.26	5.16	5.73	1
cds979	187.04	123.01	132.18	109.49	44.26	107.44
cds98	0.8	0.22	0.52	0.33	0.56	0.67
cds980	122.96	102.21	64.31	42.96	19.31	43.46
cds981	4.96	3.2	8.97	2.9	0	3.91
cds982	318.15	189.87	118.63	72.29	46.31	85.66
cds983	361	199.57	172.02	90.31	95.74	184.73
cds984	129.94	115.46	107.1	78.97	18.59	100.55
cds985	34.79	9	23.93	26.78	15.76	33
cds986	9.41	7.22	9.01	3.91	1	2.99
cds987	21.33	14.74	10.85	7.68	6.56	17.11
cds988	49.11	15.28	25.05	5.05	2	32.65
cds989	228.68	177.52	177.03	94.65	128.59	193.91
cds99	0.5	0	0	0	1.42	0.47
cds990	14.86	10.02	24.66	12.32	5.06	16.12
cds991	10.11	6.36	7.15	3.61	4.8	6.59
cds992	11.82	6.41	7.51	11.54	7.46	9.92
cds993	408.8	328.71	246.31	209.15	200.18	248.6
cds994	122.26	103.24	61	20.01	27.03	93.61
cds995	955.99	611.43	599.6	823.89	711.07	849.28
cds996	307.61	192.33	150.09	121.51	110.11	247.97
cds997	33.64	7.68	14.49	17.14	1.89	7.58
cds998	141.07	63.87	72.55	32.95	31.64	68.65
cds999	7.86	18.48	16.3	9.24	10.6	9.22

## Sheet: Luck et al., 2015
luck_wdi_adultfemale_bodywall_a	luck_wdi_adultfemale_bodywall_b	luck_wdi_adultfemale_head_a	luck_wdi_adultfemale_head_b	luck_wdi_adultfemale_intestine_a	luck_wdi_adultfemale_intestine_b	luck_wdi_adultfemale_uterus_a	luck_wdi_adultfemale_uterus_b	luck_wdi_adultmale_bodywall_a	luck_wdi_adultmale_bodywall_b	luck_wdi_adultmale_intestine_a	luck_wdi_adultmale_testis_a
fig|82301.12.peg.1	0	0	0.5	0	0	0	0	0	0	0	0	0
fig|82301.12.peg.10	0	0	0	0	0	0	0	0	0	0	0	0
fig|82301.12.peg.100	0	0	0	0	0	0	0	0	0	0	0	0
fig|82301.12.peg.101	0	0	0	0	0	0	0	0	0	0	0	0
fig|82301.12.peg.102	1	0.5	0	0.5	0	0	0	0	1	0.5	0	0
fig|82301.12.peg.103	0.5	0	0	0.27	0	0	0	0.5	0	0	0	0
fig|82301.12.peg.104	0	0	0	0.07	0	0	0	0	0	0	0	0
fig|82301.12.peg.105	0	0	0	0	0	0	0	0	0	0	0	0
fig|82301.12.peg.106	0.26	0	0	0	0	0	0	0	0	0	0	0
fig|82301.12.peg.107	0	0	0	0	0	0	0	0	0	0.5	0	0
fig|82301.12.peg.108	0	0	0	0	0	0	0	0	0	0	0	0
fig|82301.12.peg.109	0	0	0	0	0	0	0	0	0	0	0	0
fig|82301.12.peg.11	0	0	0	0	0	0	0	0	0	0	0	0
fig|82301.12.peg.110	0	1	1	0	0	0	0	0	0	0	0	0
fig|82301.12.peg.111	0	0	0	0	0	0	0	0	0	0	0	0
fig|82301.12.peg.112	0	0	0	0.5	0	0	0	0	0	3	0	0
fig|82301.12.peg.113	0	0	0	0	0	0	0	0	0	0	0	0
fig|82301.12.peg.114	0	0	0	0	0	0	0	0	0	0	0	0
fig|82301.12.peg.115	0	0	0	0	0	0	0	0	0	0	0	0
fig|82301.12.peg.116	0	0	0	0	0	0	0	0	0.5	0.5	0	0
fig|82301.12.peg.117	0	0	0	0	0	0	0	0	0	0	0	0
fig|82301.12.peg.118	0.5	0	0	0	0	0	0	0	0.5	1	0	0
fig|82301.12.peg.119	0	0	0	0	0	0	0	0	0	0	0	0
fig|82301.12.peg.12	0	0	0.5	0	0	0	0	0	1	0.5	0	0
fig|82301.12.peg.120	0	0	0	0	0	0	0	0	0	0	0	0
fig|82301.12.peg.121	0	0	0	0	0	0	0	0	0	0	0	0
fig|82301.12.peg.122	0	0	0	0	0	0	0	0	0	0	0	0
fig|82301.12.peg.123	1.5	6.5	3.5	5	0	0	0	1	3	0.5	0	0
fig|82301.12.peg.124	6.5	16	3	7	0	0	0.5	6	16	11.5	0	0
fig|82301.12.peg.125	0	0	0	0	0	0	0	0	0.5	0.5	0	0
fig|82301.12.peg.126	0	0	0	0	0	0	0	0	0	0	0	0
fig|82301.12.peg.127	0	0	0	0	0	0	0	0	0	0	0	0
fig|82301.12.peg.128	0	0	0	0	0	0	0	0	0	0	0	0
fig|82301.12.peg.129	0	0	0	0	0	0	0	0	0.5	0	0	0
fig|82301.12.peg.13	1	0.5	0.5	1	0	0	0	0.5	2.5	1	0	0
fig|82301.12.peg.130	0	0	0	0	0	0	0	0	0	0	0	0
fig|82301.12.peg.131	0.5	0	0.5	1	0	0	0	0.5	1.5	5.5	0	0
fig|82301.12.peg.132	0	0	0	0	0	0	0	0	0	0	0	0
fig|82301.12.peg.133	0	0	0	0	0	0	0	0	1	0.5	0	0
fig|82301.12.peg.134	0	0	0	0	0	0	0	0	0	0	0	0
fig|82301.12.peg.135	0	0	0	0	0	0	0	0	0	0	0	0
fig|82301.12.peg.136	0	0	0	0	0	0	0	0	0	0	0	0
fig|82301.12.peg.137	0	0	0	0.62	0	0	0	0	1.38	0.91	0	0
fig|82301.12.peg.138	1	0	1	0	0	0	0	0	1	1	0	0
fig|82301.12.peg.139	1.5	0	0	0	0	0	0	0	0	0	0	0
fig|82301.12.peg.14	0	0	0	0	0	0	0	0	1	0.5	0	0
fig|82301.12.peg.140	0	0	0	0	0	0	0	0	4	2.5	0	0
fig|82301.12.peg.141	0.5	1	1	0	0	0	0	0	0.38	0	0	0
fig|82301.12.peg.142	0	0	0	0	0	0	0	0	0.03	0	0	0
fig|82301.12.peg.143	0	0	0	0	0	0	0	0	0	0	0	0
fig|82301.12.peg.144	0	0	0	0	0	0	0	0	0	0	0	0
fig|82301.12.peg.145	0	0	0	0	0	0	0	0	0	0	0	0
fig|82301.12.peg.146	0	0	0	0	0	0	0	0	0	0	0	0
fig|82301.12.peg.147	0	0	0	0	0	0	0	0	1	0	0	0
fig|82301.12.peg.148	0	0	0	0	0	0	0	0	0	0	0	0
fig|82301.12.peg.149	0	0	0	0	0	0	0	0	0	0	0	0
fig|82301.12.peg.15	0	0	0	0	0	0	0	0	0	0	0	0
fig|82301.12.peg.150	0	0	0	0	0	0	0	0	0	0	0	0
fig|82301.12.peg.151	0	0	0	0	0	0	0	0	0	0	0	0
fig|82301.12.peg.152	0	0	0	0	0	0	0	0	0	0	0	0
fig|82301.12.peg.153	0	0	0	0	0	0	0	0	0	0	0	0
fig|82301.12.peg.154	0	0	0	0	0	0	0	0	0	0	0	0
fig|82301.12.peg.155	0	0	0	0	0	0	0	0	1	0.5	0	0
fig|82301.12.peg.156	0	0	0	0	0	0	0	0	0	0	0	0
fig|82301.12.peg.157	0	0	0	0	0	0	0	0	0	0	0	0
fig|82301.12.peg.158	0	0	0	0	0	0	0	0	0	0	0	0
fig|82301.12.peg.159	0	0	0	0	0	0	0	0	0	0	0	0
fig|82301.12.peg.16	0	0	0	0	0	0	0	0	0	0	0	0
fig|82301.12.peg.160	0	0	0	0	0	0	0	0	0	0	0	0
fig|82301.12.peg.161	0	0	0	0	0	0	0	0	0	0	0	0
fig|82301.12.peg.162	3	1	1.5	1.5	0	0	0	0	3	2.5	0	0
fig|82301.12.peg.163	0	0	0	0	0	0	0	0	0	0	0	0
fig|82301.12.peg.164	0	0	0	0	0	0	0	0	0	0	0	0
fig|82301.12.peg.165	0	0	0.5	0	0	0	0	0	2	0.5	0	0
fig|82301.12.peg.166	0	0	0	0	0	0	0	0	0	0	0	0
fig|82301.12.peg.167	0	0	0	0	0	0	0	0	0	0	0	0
fig|82301.12.peg.168	0	0	0	0	0	0	0	0	0	0	0	0
fig|82301.12.peg.169	0	0	0	0	0	0	0	0	0.5	0	0	0
fig|82301.12.peg.17	0	0	0	0	0	0	0	0	0	0	0	0
fig|82301.12.peg.170	0	0	0	0	0	0	0	0	0	0	0	0
fig|82301.12.peg.171	0	0	0	0	0	0	0	0	0	0	0	0
fig|82301.12.peg.172	0	0	0	0	0	0	0	0	0	0	0	0
fig|82301.12.peg.173	0.93	1	0	0	0	0	0	0	0.5	0.5	0	0
fig|82301.12.peg.174	0	0	0	0	0	0	0	0	2.5	0.5	0	0
fig|82301.12.peg.175	0	0	0	0	0	0	0	0	0	0	0	0
fig|82301.12.peg.176	0.5	0	0	1.5	0	0	0	0.5	1	0.5	0	0
fig|82301.12.peg.177	0	0.5	0.5	0	0	0	0	0	0	0	0	0
fig|82301.12.peg.178	0	0	0	0	0	0	0	0	0	0	0	0
fig|82301.12.peg.179	0	0	0	0	0	0	0	0	0	0	0	0
fig|82301.12.peg.18	0	0	0	0	0	0	0	0	0	0	0	0
fig|82301.12.peg.180	0	0	0	0	0	0	0	0	0	0	0	0
fig|82301.12.peg.181	0.5	0.5	1	0	0	0	0	0	1.5	0	0	0
fig|82301.12.peg.182	0	0	0	0	0	0	0	0	0	0	0	0
fig|82301.12.peg.183	0	0	0	0	0	0	0	0	0	0	0	0
fig|82301.12.peg.184	1	0	1	1	0	0	0	0	3	1	0	0
fig|82301.12.peg.185	0	0	0	0	0	0	0	0	0	0	0	0
fig|82301.12.peg.186	0	0	0	0	0	0	0	0	0	0.5	0	0
fig|82301.12.peg.187	0	0	0	0	0	0	0	0	0	0	0	0
fig|82301.12.peg.188	0.31	0.5	0	0	0	0	0	0	0.5	0.17	0	0
fig|82301.12.peg.189	0	0	0	0	0	0	0	0	0	0	0	0
fig|82301.12.peg.19	0	0	0	0	0	0	0	0	0	0	0	0
fig|82301.12.peg.190	0	0	0	0	0	0	0	0	0	0	0	0
fig|82301.12.peg.191	0	0	0	0	0	0	0	0	0	0	0	0
fig|82301.12.peg.192	0	0	0	0	0	0	0	0	0	0	0	0
fig|82301.12.peg.193	0	0	0	0	0	0	0	0	0	0	0	0
fig|82301.12.peg.194	0	0	0	0	0	0	0	0	0	0	0	0
fig|82301.12.peg.195	0	0.5	0.5	0	0	0	0	0.5	3.5	1	0	0
fig|82301.12.peg.196	0	0	0	0	0	0	0	0	0	0	0	0
fig|82301.12.peg.197	0.5	0	0	0	0	0	0	0	0	0	0	0
fig|82301.12.peg.198	0	0	0	0	0	0	0	0	0	0	0	0
fig|82301.12.peg.199	0	0	0	0	0	0	0	0	0	0	0	0
fig|82301.12.peg.2	0	0	0	0	0	0	0	0	0	0	0	0
fig|82301.12.peg.20	0	0	0	0	0	0	0	0	0	0	0	0
fig|82301.12.peg.200	0	0	0	0	0	0	0	0	0	0	0	0
fig|82301.12.peg.201	0	0	0	0	0	0	0	0	0	0	0	0
fig|82301.12.peg.202	0	0	0	0	0	0	0	0	0	0	0	0
fig|82301.12.peg.203	0	0	0	0	0	0	0	0	0	0.5	0	0
fig|82301.12.peg.204	0	0	0	0	0	0	0	0	0	0	0	0
fig|82301.12.peg.205	0	0	0	0	0	0	0	0	0	0	0	0
fig|82301.12.peg.206	0	0.5	0	0.5	0	0	0	0	1	1	0	0
fig|82301.12.peg.207	0	0	0	0	0	0	0	0	0	0	0	0
fig|82301.12.peg.208	0	0	0	0	0	0	0	0	0	0	0	0
fig|82301.12.peg.209	0	0	0	0	0	0	0	0	0	0	0	0
fig|82301.12.peg.21	0.5	0	0	0	0	0	0	0	0	0	0	0
fig|82301.12.peg.210	0	0	0	0	0	0	0	0	0	0	0	0
fig|82301.12.peg.211	0.5	0	0.5	0.5	0	0	0	0.5	0.5	1	0	0
fig|82301.12.peg.212	0	0	0	0	0	0	0	0	0	0	0	0
fig|82301.12.peg.213	0	0	0	0	0	0	0	0	0	0	0	0
fig|82301.12.peg.214	0	0	0	0	0	0	0	0	0	0	0	0
fig|82301.12.peg.215	0	0	0	0	0	0	0	0	0	0	0	0
fig|82301.12.peg.216	0	0	0	0	0	0	0	0	0	0	0	0
fig|82301.12.peg.217	0	0	0	0	0	0	0	0	0	0	0	0
fig|82301.12.peg.218	0	0	0	0	0	0	0	0	0	0	0	0
fig|82301.12.peg.219	0	0	0	0	0	0	0	0	0	0	0	0
fig|82301.12.peg.22	0	0	0	0	0	0	0	0	0	0	0	0
fig|82301.12.peg.220	0	0	0	0	0	0	0	0	0	0	0	0
fig|82301.12.peg.221	0	0	0	0	0	0	0	0	0	0	0	0
fig|82301.12.peg.222	0	0	0	0	0	0	0	0	1.5	1	0	0
fig|82301.12.peg.223	1	0	0.5	0	0	0	0	0	0	0.5	0	0
fig|82301.12.peg.224	0	0	0	0	0	0	0	0	0	0	0	0
fig|82301.12.peg.225	0	0.5	0	0	0	0	0	0	0	0	0	0
fig|82301.12.peg.226	1.5	2	0	0.5	0	0	0	0	1.5	3	0	0
fig|82301.12.peg.227	0.5	0.5	0	0	0	0	0	0	0.5	0	0	0
fig|82301.12.peg.228	0	0	0	0	0	0	0	0	0	0	0	0
fig|82301.12.peg.229	1.5	3.5	1	0	0	0	0	0.5	0.5	0.5	0	0
fig|82301.12.peg.23	0	0	0	0	0	0	0	0	0	0	0	0
fig|82301.12.peg.230	0	0	0	0	0	0	0	0	0	0	0	0
fig|82301.12.peg.231	0	0	0	0	0	0	0	0	0	0	0	0
fig|82301.12.peg.232	0	0	0	0	0	0	0	0	0	0	0	0
fig|82301.12.peg.233	0	0	0	0	0	0	0	0	0	0.5	0	0
fig|82301.12.peg.234	0	0	0	0	0	0	0	0	0	0	0	0
fig|82301.12.peg.235	0.09	0	0.04	0	0	0	0	0	0.06	0.08	0	0
fig|82301.12.peg.236	0	0	0	0	0	0	0	0	0	0	0	0
fig|82301.12.peg.237	0	0	0	0	0	0	0	0	0	0	0	0
fig|82301.12.peg.238	0	0	0	0	0	0	0	0	0	0	0	0
fig|82301.12.peg.239	0.44	0.1	0.28	0.07	0	0	0.36	0	1.37	0.32	0	0
fig|82301.12.peg.24	0	0	0	0	0	0	0	0	0	0	0	0
fig|82301.12.peg.240	0	0	0	0	0	0	0	0	0	0	0	0
fig|82301.12.peg.241	0	0	0	0	0	0	0	0	0	0	0	0
fig|82301.12.peg.242	0	0	0	0	0	0	0	0	0	0	0	0
fig|82301.12.peg.243	0	0	0	0	0	0	0	0	0	0	0	0
fig|82301.12.peg.244	1.65	3.36	0.47	1.68	0	0	0	0.72	0.35	0.5	0	0
fig|82301.12.peg.245	4	1.5	1	1.5	0	0	0	0	1	2	0	0
fig|82301.12.peg.246	0.5	0	0	0	0	0	0	0	0	0	0	0
fig|82301.12.peg.247	0	0	0	0	0	0	0	0	1	0.5	0	0
fig|82301.12.peg.248	0	0	0	0	0	0	0	0	0	0	0	0
fig|82301.12.peg.249	0	0	0	0	0	0	0	0	0	0	0	0
fig|82301.12.peg.25	0	1	0	0	0	0	0	0	0.5	0	0	0
fig|82301.12.peg.250	0.5	0	0.38	0.28	0	0	0	0	1.5	0.5	0	0
fig|82301.12.peg.251	0	0.45	0.03	0.63	0	0	0	0	1	0.5	0	0
fig|82301.12.peg.252	0	0	0	0	0	0	0	0	0	0	0	0
fig|82301.12.peg.253	0	0	0	0	0	0	0	0	0	0	0	0
fig|82301.12.peg.254	0	0	0	0	0	0	0	0	0	0	0	0
fig|82301.12.peg.255	0	0	0	0.44	0	0	0	0	0	0.39	0	0
fig|82301.12.peg.256	0	0	0	0	0	0	0	0	0	0	0	0
fig|82301.12.peg.257	0	0	0	0	0	0	0	0	0	0	0	0
fig|82301.12.peg.258	0	0	0	0	0	0	0	0	0	0	0	0
fig|82301.12.peg.259	0.41	0	0	0	0	0	0	0	0.06	0.18	0	0
fig|82301.12.peg.26	0	0	0	0	0	0	0	0	0	0	0	0
fig|82301.12.peg.260	0.44	0	0	0	0	0	0	0	0.82	0.21	0	0
fig|82301.12.peg.261	0	0	0	0	0	0	0	0	0	0	0	0
fig|82301.12.peg.262	0	0	0	0	0	0	0	0	1	0	0	0
fig|82301.12.peg.263	0.38	0.06	0	0	0	0	0	0	1.15	0.82	0	0
fig|82301.12.peg.264	5.52	0.92	2	0	0	0	0	1	0.82	2.65	0	0
fig|82301.12.peg.265	0	0	0	0	0	0	0	0	0	0	0	0
fig|82301.12.peg.266	0	0	0	0	0	0	0	0	0	0	0	0
fig|82301.12.peg.267	0	0	0	0	0	0	0	0	1	1.5	0	0
fig|82301.12.peg.268	2.46	0.48	1	0	0	0	0	0.98	0	0	0	0
fig|82301.12.peg.269	0	0.5	1	0	0	0	0	0.5	3	1.5	0	0
fig|82301.12.peg.27	0	0	0	0	0	0	0	0	0	0	0	0
fig|82301.12.peg.270	0	0	0	0	0	0	0	0	0.5	0	0	0
fig|82301.12.peg.271	0	0	0	0	0	0	0	0	1	0	0	0
fig|82301.12.peg.272	0	0	0	0	0	0	0	0	0	0	0	0
fig|82301.12.peg.273	0	0	0	0	0	0	0	0	0	0	0	0
fig|82301.12.peg.274	0	0	0	0	0	0	0	0	0	0	0	0
fig|82301.12.peg.275	0	0	0	0	0	0	0	0	0	0	0	0
fig|82301.12.peg.276	0	0	0	0	0	0	0	0	0	0	0	0
fig|82301.12.peg.277	0	0	0	0	0	0	0	0	0	0	0	0
fig|82301.12.peg.278	0	0	0	0	0	0	0	0	0	0	0	0
fig|82301.12.peg.279	0	0	0	0	0	0	0	0	0	0	0	0
fig|82301.12.peg.28	0	0	0	0	0	0	0	0	0	0	0	0
fig|82301.12.peg.280	0	0	0	0	0	0	0	0	0	0	0	0
fig|82301.12.peg.281	0	0	0	0	0	0	0	0	0	0	0	0
fig|82301.12.peg.282	0	0	0	0	0	0	0	0	0	0	0	0
fig|82301.12.peg.283	0	0	0	0	0	0	0	0	0.5	0	0	0
fig|82301.12.peg.284	0	0	0	0	0	0	0	0	0	0	0	0
fig|82301.12.peg.285	0	0	0	0	0	0	0	0	0	0	0	0
fig|82301.12.peg.286	0.5	0	0.5	0	0	0	0.5	0	0.5	0	0	0
fig|82301.12.peg.287	0	0.5	0	0	0	0	0	0	0	0	0	0
fig|82301.12.peg.288	0	0	0	0	0	0	0	0	0	0	0	0
fig|82301.12.peg.289	0	0	0	0	0	0	0	0	0	0	0	0
fig|82301.12.peg.29	0	0	0	0	0	0	0	0	0	0	0	0
fig|82301.12.peg.290	0	0	0	0	0	0	0	0	0	0	0	0
fig|82301.12.peg.291	0	0	0	0	0	0	0	0	0	0	0	0
fig|82301.12.peg.292	0	0	0	0	0	0	0	0	0	0	0	0
fig|82301.12.peg.293	0	0	0	0	0	0	0	0	0	0	0	0
fig|82301.12.peg.294	0	0	0	0	0	0	0	0	0	0	0	0
fig|82301.12.peg.295	0	0	0	0	0	0	0	0	0	0	0	0
fig|82301.12.peg.296	0	0	0	0	0	0	0	0	0	0	0	0
fig|82301.12.peg.297	0	0	0	0	0	0	0	0	0	0	0	0
fig|82301.12.peg.298	1	0.5	1	2	0	0	0	0	1	0	0	0
fig|82301.12.peg.299	0	0	0	0	0	0	0	0	0	0.5	0	0
fig|82301.12.peg.3	0	0	0	0	0	0	0	0	0	0	0	0
fig|82301.12.peg.30	0	0	0	0	0	0	0	0	0	0	0	0
fig|82301.12.peg.300	1	0.59	0.5	1	0	0	0	0	0.5	0.6	0	0
fig|82301.12.peg.301	0	0	0	0	0	0	0	0	0	0	0	0
fig|82301.12.peg.302	0	0	0	0	0	0	0	0	0	0	0	0
fig|82301.12.peg.303	0	0	0	0	0	0	0	0	0	0	0	0
fig|82301.12.peg.304	0	0.5	0	0	0	0	0	0	0	0.5	0	0
fig|82301.12.peg.305	0	0	0	0	0	0	0	0	0	0	0	0
fig|82301.12.peg.306	6.42	8.5	4.5	4.5	0	0	0	1	22.5	18.5	0	0
fig|82301.12.peg.307	0	0	0	0	0	0	0	0	0	0	0	0
fig|82301.12.peg.308	0	0	0	0	0	0	0	0	0.5	0	0	0
fig|82301.12.peg.309	0	0	0	0	0	0	0	0	0	0	0	0
fig|82301.12.peg.31	0	0	0	0	0	0	0	0	0	0	0	0
fig|82301.12.peg.310	0	0	0	0	0	0	0	0	0.5	1	0	0
fig|82301.12.peg.311	0	0	0	0	0	0	0	0	1	0	0	0
fig|82301.12.peg.312	0	0	0	0	0	0	0	0	0	0	0	0
fig|82301.12.peg.313	0	0	0	0	0	0	0	0	0	0	0	0
fig|82301.12.peg.314	0	0	0	0	0	0	0	0	0	0	0	0
fig|82301.12.peg.315	0	0	0	0.1	0	0	0	0	0	0.08	0	0
fig|82301.12.peg.316	1	0.5	0	0.78	0	0	0	0.5	1	1.25	0	0
fig|82301.12.peg.317	0	0	0	0	0	0	0	0	0	0	0	0
fig|82301.12.peg.318	2.81	0.5	0	0	0	0	0	0.5	1	2	0	0
fig|82301.12.peg.319	0	0	0	0	0	0	0	0	0	0	0	0
fig|82301.12.peg.32	0	0	0	0	0	0	0	0	0.5	0	0	0
fig|82301.12.peg.320	0	0	0	0	0	0	0	0	0	0	0	0
fig|82301.12.peg.321	0	0	0	0.5	0	0	0	0	0	0	0	0
fig|82301.12.peg.322	0	0	0	0.5	0	0	0	0.5	0.5	0.5	0	0
fig|82301.12.peg.323	1.5	0	1	0	0	0	0	0	1	0.5	0	0
fig|82301.12.peg.324	0	0	0	0	0	0	0	0	0	0	0	0
fig|82301.12.peg.325	0	0	0	0	0	0	0	0	0	0.5	0	0
fig|82301.12.peg.326	0	0.5	0	0	0	0	0	0	0	1	0	0
fig|82301.12.peg.327	0	0	0	0	0	0	0	0	0	0	0	0
fig|82301.12.peg.328	0	0	0	0	0	0	0	0	0	0	0	0
fig|82301.12.peg.329	0	0	0	0	0	0	0	0	0	0	0	0
fig|82301.12.peg.33	0	0	0.5	0	0	0	0	0	2	0.5	0	0
fig|82301.12.peg.330	0.49	0	0	0	0	0	0	0	2.5	1	0	0
fig|82301.12.peg.331	0	0	0	0	0	0	0	0	0	0	0	0
fig|82301.12.peg.332	0	0	0	0	0	0	0	0	0	0	0	0
fig|82301.12.peg.333	0	0	0	0	0	0	0	0	0	0	0	0
fig|82301.12.peg.334	0	0	0	0	0	0	0	0	0	0	0	0
fig|82301.12.peg.335	0	0	0.5	0.51	0	0	0	0	1	0	0	0
fig|82301.12.peg.336	1	0.5	1	0	0	0	0	0	4	2	0	0
fig|82301.12.peg.337	0	0	0	0	0	0	0	0	0	0	0	0
fig|82301.12.peg.338	0	0	0	0	0	0	0	0	0.5	0.5	0	0
fig|82301.12.peg.339	0	0	0	0	0	0	0	0	0	0	0	0
fig|82301.12.peg.34	0	0	0	0	0	0	0	0	0	0	0	0
fig|82301.12.peg.340	0	0	0	0	0	0	0	0	0	0	0	0
fig|82301.12.peg.341	0	0	0	0	0	0	0	0	0	0	0	0
fig|82301.12.peg.342	0	0	0	0	0	0	0	0	0	0	0	0
fig|82301.12.peg.343	0	0	0	0	0	0	0	0	0	0	0	0
fig|82301.12.peg.344	0	0	0	0	0	0	0	0	0	0	0	0
fig|82301.12.peg.345	0	0	0	0	0	0	0	0	0	0	0	0
fig|82301.12.peg.346	0	0	0	0	0	0	0	0	0	0	0	0
fig|82301.12.peg.347	0	0	0	0	0	0	0	0	0	0	0	0
fig|82301.12.peg.348	0	0	0	0	0	0	0	0	0	0	0	0
fig|82301.12.peg.349	0	0	0	0	0	0	0	0	0	0	0	0
fig|82301.12.peg.35	0	0	0.45	0	0	0	0	0	0.55	0.5	0	0
fig|82301.12.peg.350	0	0	0	0	0	0	0	0	0	0	0	0
fig|82301.12.peg.351	0	0	0	0	0	0	0	0	0	0	0	0
fig|82301.12.peg.352	0	0	0	0	0	0	0	0	0	0	0	0
fig|82301.12.peg.353	0	0	1	0	0	0	0.5	0	0	0.5	0	0
fig|82301.12.peg.354	0	0	0	0	0	0	0	0	0	0	0	0
fig|82301.12.peg.355	0	0	0	0	0	0	0	0	0	0	0	0
fig|82301.12.peg.356	0	0	0	0	0	0	0	0	0	0	0	0
fig|82301.12.peg.357	0	0	0	0	0	0	0	0	0	0	0	0
fig|82301.12.peg.358	0	0	0	0	0	0	0	0	0	1	0	0
fig|82301.12.peg.359	1.5	0.5	0	0.5	0	0	0	0.5	2	0.5	0	0
fig|82301.12.peg.36	0	0	0	0	0	0	0	0	0	0	0	0
fig|82301.12.peg.360	0	0	0	0	0	0	0	0	0	0	0	0
fig|82301.12.peg.361	0	0	0	0	0	0	0	0	0.25	0	0	0
fig|82301.12.peg.362	0	0	0	0	0	0	0	0	0.08	0	0	0
fig|82301.12.peg.363	0	0	0	0	0	0	0	0	0.08	0	0	0
fig|82301.12.peg.364	0	0	0	0	0	0	0	0	0	0	0	0
fig|82301.12.peg.365	0	0	0	0	0	0	0	0	0	0	0	0
fig|82301.12.peg.366	1	0.5	1.5	0	0	0	0	0	0.5	2.5	0	0
fig|82301.12.peg.367	0	0	0	0	0	0	0	0	0	0	0	0
fig|82301.12.peg.368	1.5	0	0	0.5	0	0	0	0	1	1	0	0
fig|82301.12.peg.369	0	0.5	0.5	0	0	0	0	0	0.5	0.01	0	0
fig|82301.12.peg.37	0	0	0	0	0	0	0	0	0	0	0	0
fig|82301.12.peg.370	0	0	0	0	0	0	0	0	0	0.46	0	0
fig|82301.12.peg.371	0	0	0	0	0	0	0	0	0	0	0	0
fig|82301.12.peg.372	0.5	0	0	0	0	0	0	0	0	0	0	0
fig|82301.12.peg.373	0	0	0	0	0	0	0	0	0	0	0	0
fig|82301.12.peg.374	0	0	0	0	0	0	0	0	0	0	0	0
fig|82301.12.peg.375	0	0	0	0	0	0	0	0	0	0	0	0
fig|82301.12.peg.376	0	0	0	0	0	0	0	0	0	0	0	0
fig|82301.12.peg.377	0	0	0	0	0	0	0	0	0	0	0	0
fig|82301.12.peg.378	0	0	0	0	0	0	0	0	0	0	0	0
fig|82301.12.peg.379	0	0	0	0	0	0	0	0	0	0	0	0
fig|82301.12.peg.38	0	0	0	0.5	0	0	0	0	2	2	0	0
fig|82301.12.peg.380	0	0	0	0	0	0	0	0	0.47	0	0	0
fig|82301.12.peg.381	0	0.28	0	0	0	0	0	0	0	0	0	0
fig|82301.12.peg.382	0	0.2	0	0.5	0	0	0	0	0.5	0	0	0
fig|82301.12.peg.383	0	0	0.5	0	0	0	0	0	1	0	0	0
fig|82301.12.peg.384	0	0	0	0	0	0	0	0	0	0	0	0
fig|82301.12.peg.385	0	0	0	0	0	0	0	0	0	0	0	0
fig|82301.12.peg.386	0	0	0	0	0	0	0	0	0	0	0	0
fig|82301.12.peg.387	0	0	0	0	0	0	0	0	0	0	0	0
fig|82301.12.peg.388	0	0	0	0	0	0	0	0	0	0	0	0
fig|82301.12.peg.389	0.5	0.5	2	0	0	0	0	0	1.5	0.5	0	0
fig|82301.12.peg.39	0	0	0	0	0	0	0	0	0	0	0	0
fig|82301.12.peg.390	0.4	0	0.4	0	0	0	0	0	0.26	0	0	0
fig|82301.12.peg.391	0	1	0	0	0	0	0	0	0.5	0.5	0	0
fig|82301.12.peg.392	0	0	0	0.07	0	0	0	0	0.5	1	0	0
fig|82301.12.peg.393	0.5	0	0	0.15	0	0	0	0	0	0.51	0	0
fig|82301.12.peg.394	0	0	0	0	0	0	0	0	0	0	0	0
fig|82301.12.peg.395	0	0	0	0.5	0	0	0	0	0.5	1.5	0	0
fig|82301.12.peg.396	0	0	0	0	0	0	0	0	0	0	0	0
fig|82301.12.peg.397	0	0	0	0	0	0	0	0	0	0	0	0
fig|82301.12.peg.398	0	0	0	0	0	0	0	0	0	0	0	0
fig|82301.12.peg.399	0	0	0	0	0	0	0	0	0	0	0	0
fig|82301.12.peg.4	0	0	0	0	0	0	0	0	0	1	0	0
fig|82301.12.peg.40	0	0	0	0	0	0	0	0	0	0	0	0
fig|82301.12.peg.400	0	0	0	0	0	0	0	0	0	0	0	0
fig|82301.12.peg.401	0	0	0	0	0	0	0	0	0	0	0	0
fig|82301.12.peg.402	0	0	0	0	0	0	0	0	0	0	0	0
fig|82301.12.peg.403	0.5	0	0	0	0	0	0	0	0	0	0	0
fig|82301.12.peg.404	0	0	0	0	0	0	0	0	0	0	0	0
fig|82301.12.peg.405	2	2	0.5	0	0	0	0.5	0	5.5	1.5	0	0
fig|82301.12.peg.406	0	0	0	0	0	0	0	0	0	0	0	0
fig|82301.12.peg.407	0	0	0	0	0	0	0	0	0	0	0	0
fig|82301.12.peg.408	0	0	0	0	0	0	0	0	0	0	0	0
fig|82301.12.peg.409	0	0	0	0	0	0	0	0	0	0	0	0
fig|82301.12.peg.41	0	1	0.5	0	0	0	0	0.5	1.5	3	0	0
fig|82301.12.peg.410	0	1	0	0	0	0	0	0.5	0.5	1	0	0
fig|82301.12.peg.411	0.5	1	0	0	0	0	0	0	0	0	0	0
fig|82301.12.peg.412	0	0	0	0	0	0	0	0	0	0	0	0
fig|82301.12.peg.413	0.5	0	0.5	0	0	0	0	0	0	0	0	0
fig|82301.12.peg.414	0	0	0	0	0	0	0	0	0	0	0	0
fig|82301.12.peg.415	0	0	0	0	0	0	0	0	0	0	0	0
fig|82301.12.peg.416	0	0	0	0	0	0	0	0	0	0	0	0
fig|82301.12.peg.417	0	0	0	0	0	0	0	0	0.5	0	0	0
fig|82301.12.peg.418	0	0	0	0	0	0	0	0	0	0	0	0
fig|82301.12.peg.419	1.5	0	0.5	1	0	0	0	0	2.5	1.5	0	0
fig|82301.12.peg.42	0	0	0	0	0	0	0	0	1	0	0	0
fig|82301.12.peg.420	0	0	0	0	0	0	0	0	0	0	0	0
fig|82301.12.peg.421	0	0	0	0	0	0	0	0	1.5	0	0	0
fig|82301.12.peg.422	0	0	0	0	0	0	0	0	0	0	0	0
fig|82301.12.peg.423	0	0	0	0	0	0	0	0	0	0	0	0
fig|82301.12.peg.424	0	0	0	0	0	0	0	0	0	0	0	0
fig|82301.12.peg.425	0	0	0	0	0	0	0	0	0	0	0	0
fig|82301.12.peg.426	0	0	0	0	0	0	0	0	0	0	0	0
fig|82301.12.peg.427	0	0	0	0	0	0	0	0	0.5	0	0	0
fig|82301.12.peg.428	0	0	0	0	0	0	0	0	0	0	0	0
fig|82301.12.peg.429	0	0	0	0	0	0	0	0	0	0	0	0
fig|82301.12.peg.43	0	0	0	0	0	0	0	0	0	0	0	0
fig|82301.12.peg.430	0	0	0	0	0	0	0	0	0	0	0	0
fig|82301.12.peg.431	0	0	0	0	0	0	0	0	0	0	0	0
fig|82301.12.peg.432	0	0	0	0	0	0	0	0	0.5	0	0	0
fig|82301.12.peg.433	0	0.5	0	0.5	0	0	0	0	2	0	0	0
fig|82301.12.peg.434	0	0	0	0	0	0	0	0	0	0	0	0
fig|82301.12.peg.435	0	0	0	0	0	0	0	0	0	0	0	0
fig|82301.12.peg.436	0	0	0	0	0	0	0	0	0	0	0	0
fig|82301.12.peg.437	0	0	0	0	0	0	0	0	0	0	0	0
fig|82301.12.peg.438	0	0	0	0	0	0	0	0	0	0	0	0
fig|82301.12.peg.439	0	0	0	0	0	0	0	0	0	0	0	0
fig|82301.12.peg.44	0	0	0	0	0	0	0	0	0	0	0	0
fig|82301.12.peg.440	0	0	0	0	0	0	0	0	0	0	0	0
fig|82301.12.peg.441	0	0	0	0	0	0	0	0	0.5	0	0	0
fig|82301.12.peg.442	0	0.5	0.5	0	0	0	0	0	0.5	0	0	0
fig|82301.12.peg.443	0	0	0	0	0	0	0	0	0	0	0	0
fig|82301.12.peg.444	0	0	0	0	0	0	0	0	0	0	0	0
fig|82301.12.peg.445	0	0	0	0	0	0	0	0	0	0	0	0
fig|82301.12.peg.446	0	0	0	0	0	0	0	0	0	0	0	0
fig|82301.12.peg.447	0	0	0	0	0	0	0	0	0	0	0	0
fig|82301.12.peg.448	0	0	0	0	0	0	0	0	0	0	0	0
fig|82301.12.peg.449	1	0	0	0	0	0	0	0.5	0.5	2	0	0
fig|82301.12.peg.45	0	0	0	0	0	0	0	0	0	0	0	0
fig|82301.12.peg.450	0.5	0.5	0	0	0	0	0	0	0.5	1.5	0	0
fig|82301.12.peg.451	0	0	0	0	0	0	0	0	0	0	0	0
fig|82301.12.peg.452	0	0	0	0	0	0	0	0	0	0	0	0
fig|82301.12.peg.453	0	0	0	0	0	0	0	0	0	0	0	0
fig|82301.12.peg.454	0	0	0	0	0	0	0	0	0	0	0	0
fig|82301.12.peg.455	0	0	0	0	0	0	0	0	0	0	0	0
fig|82301.12.peg.456	0	0	0	0	0	0	0	0	0.38	0	0	0
fig|82301.12.peg.457	2.5	0.5	1	1	0	0	0	0.5	4	4.5	0	0
fig|82301.12.peg.458	0	0	0	0	0	0	0	0	0	0	0	0
fig|82301.12.peg.459	0	0	0	0	0	0	0	0	0	0	0	0
fig|82301.12.peg.46	0	0	0	0	0	0	0	0	2	2	0	0
fig|82301.12.peg.460	0	0	0	0	0	0	0	0	0	0	0	0
fig|82301.12.peg.461	0	0	0	0	0	0	0	0	0	0	0	0
fig|82301.12.peg.462	0	0	0	0	0	0	0	0	0	0	0	0
fig|82301.12.peg.463	0	0	0	0	0	0	0	0	0	0	0	0
fig|82301.12.peg.464	0	0	0	0	0	0	0	0	0	0.5	0	0
fig|82301.12.peg.465	0	0	0	0	0	0	0	0	0	0	0	0
fig|82301.12.peg.466	0	0	0	0	0	0	0	0	0	0	0	0
fig|82301.12.peg.467	0	0	0	0	0	0	0	0	0	0	0	0
fig|82301.12.peg.468	0	0	0	0	0	0	0	0	0	0	0	0
fig|82301.12.peg.469	0	0	0	0	0	0	0	0	0	0	0	0
fig|82301.12.peg.47	0	0	0	0	0	0	0	0	0	0	0	0
fig|82301.12.peg.470	0	0	0	0	0	0	0	0	0	0	0	0
fig|82301.12.peg.471	0	0	0	0	0	0	0	0	0	0	0	0
fig|82301.12.peg.472	0	0	0	0	0	0	0	0	1	0	0	0
fig|82301.12.peg.473	0	0	0	0	0	0	0	0	0	0	0	0
fig|82301.12.peg.474	0	0	0	0	0	0	0	0	0	0	0	0
fig|82301.12.peg.475	0	0	0	0	0	0	0	0	0	0	0	0
fig|82301.12.peg.476	0	0	0	0	0	0	0	0	0	0	0	0
fig|82301.12.peg.477	0	0	0	0	0	0	0	0	0	0	0	0
fig|82301.12.peg.478	0.5	0	0	0	0	0	0	0	1	1	0	0
fig|82301.12.peg.479	0	0	0	0	0	0	0	0	0	0	0	0
fig|82301.12.peg.48	0	0	0	0	0	0	0	0	0	0	0	0
fig|82301.12.peg.480	0	0	0	0	0	0	0	0	0	0	0	0
fig|82301.12.peg.481	0.5	0	0	0	0	0	0	0	0	0	0	0
fig|82301.12.peg.482	0	0	0	0	0	0	0	0	0	0	0	0
fig|82301.12.peg.483	1	0	0	0	0	0	0	0	1.5	0	0	0
fig|82301.12.peg.484	0	0	0	0	0	0	0	0	0	0	0	0
fig|82301.12.peg.485	0	0	0	0	0	0	0	0	0	0	0	0
fig|82301.12.peg.486	0	0	0	0	0	0	0	0	0	0	0	0
fig|82301.12.peg.487	0	0	0	0	0	0	0	0	0	0	0	0
fig|82301.12.peg.488	0	0	0	0	0	0	0	0	0	0	0	0
fig|82301.12.peg.489	0	0	0	0	0	0	0	0	0	0	0	0
fig|82301.12.peg.49	0	0	0	0	0	0	0	0	0	0	0	0
fig|82301.12.peg.490	0	0	0	0	0	0	0	0	0	0	0	0
fig|82301.12.peg.491	0	0	0	0	0	0	0	0	0	0	0	0
fig|82301.12.peg.492	0	0	0	0	0	0	0	0	0	0	0	0
fig|82301.12.peg.493	0	0	0	0	0	0	0	0	0	0	0	0
fig|82301.12.peg.494	0.5	0	0	0	0	0	0	0	0.5	0	0	0
fig|82301.12.peg.495	0	0	0	0	0	0	0	0	0.36	0.5	0	0
fig|82301.12.peg.496	0	0	0	0	0	0	0	0	0	0	0	0
fig|82301.12.peg.497	0	0	0	0	0	0	0	0	0	0	0	0
fig|82301.12.peg.498	0	0	0	0	0	0	0	0	3	0	0	0
fig|82301.12.peg.499	0	0	0	0	0	0	0	0	0	0	0	0
fig|82301.12.peg.5	3.24	7.01	3.15	1.9	0	0	0	0.48	12.79	10.86	0	0
fig|82301.12.peg.50	0	0	0	0	0	0	0	0	0	0	0	0
fig|82301.12.peg.500	0	0	0	0	0	0	0	0	0	0	0	0
fig|82301.12.peg.501	0	0	0	0	0	0	0	0	1	1.5	0	0
fig|82301.12.peg.502	0	0.5	0	0	0	0	0	0	0	0	0	0
fig|82301.12.peg.503	0	0	0	0	0	0	0	0	0	0	0	0
fig|82301.12.peg.504	0	0	0.5	0	0	0	0	0	0.5	0.5	0	0
fig|82301.12.peg.505	0.5	0	0	0.5	0	0	0	0.5	2	1	0	0
fig|82301.12.peg.506	0	0.5	0.5	0	0	0	0	0	2.91	1	0	0
fig|82301.12.peg.507	0	0	0	0	0	0	0	0	0.5	0	0	0
fig|82301.12.peg.508	0	0	0	0	0	0	0	0	0	0	0	0
fig|82301.12.peg.509	0	0	0	0	0	0	0	0	0	0	0	0
fig|82301.12.peg.51	0	0	0	0	0	0	0	0	0	0	0	0
fig|82301.12.peg.510	0	0	0	0	0	0	0	0	0	0	0	0
fig|82301.12.peg.511	0	0	0	0	0	0	0	0	0	0	0	0
fig|82301.12.peg.512	0.5	0	1	0.5	0	0	0	0	3	1	0	0
fig|82301.12.peg.513	0	0	0	0	0	0	0	0	0	0	0	0
fig|82301.12.peg.514	0	0	0	0	0	0	0	0	0	0	0	0
fig|82301.12.peg.515	0	0	0	0	0	0	0	0	0	0	0	0
fig|82301.12.peg.516	0	0	0	0	0	0	0	0	0	0	0	0
fig|82301.12.peg.517	0	0	1	0	0	0	0	0	0	0.5	0	0
fig|82301.12.peg.518	0	0.5	1	0.5	0	0	0	0	1	0	0	0
fig|82301.12.peg.519	0	0	0.5	0	0	0	0	0	0	0	0	0
fig|82301.12.peg.52	0	0	0	0	0	0	0	0	0	0	0	0
fig|82301.12.peg.520	0	0	0	0	0	0	0	0	0	0	0	0
fig|82301.12.peg.521	0	0	0	0	0	0	0	0	0	0	0	0
fig|82301.12.peg.522	0	0	0	0	0	0	0	0	1	1	0	0
fig|82301.12.peg.523	0	0	0	0	0	0	0	0	0	0.5	0	0
fig|82301.12.peg.524	0.5	0	0.5	0	0	0	0	0	1	1	0	0
fig|82301.12.peg.525	0	0	0	0	0	0	0	0	0	0	0	0
fig|82301.12.peg.526	0.49	0.49	0	0	0	0	0	0	1	1	0	0
fig|82301.12.peg.527	0	0	0	0	0	0	0	0	0	0	0	0
fig|82301.12.peg.528	0	0	0	0	0	0	0	0	0	0	0	0
fig|82301.12.peg.529	0	0	0.5	0.5	0	0	0	0	0.5	0	0	0
fig|82301.12.peg.53	0	0	0	0	0	0	0	0	0	0	0	0
fig|82301.12.peg.530	0	0	0	0	0	0	0	0	0	0	0	0
fig|82301.12.peg.531	0	0	0	0	0	0	0	0	0	0	0	0
fig|82301.12.peg.532	0	0	0	0	0	0	0	0	0	0	0	0
fig|82301.12.peg.533	0	0	0	0	0	0	0	0	0	0	0	0
fig|82301.12.peg.534	0	0	0	0	0	0	0	0	0	0	0	0
fig|82301.12.peg.535	0	0	0	0	0	0	0	0	0	0	0	0
fig|82301.12.peg.536	0	0	0	0	0	0	0	0	0	0	0	0
fig|82301.12.peg.537	0	0	0	0	0	0	0	0	0.43	0	0	0
fig|82301.12.peg.538	0	0	0	0	0	0	0	0	0	0	0	0
fig|82301.12.peg.539	0	0	0	0	0	0	0	0	0	0	0	0
fig|82301.12.peg.54	0	1	0	0	0	0	0	0	0.5	0.5	0	0
fig|82301.12.peg.540	0	0	0	0	0	0	0	0	0	0	0	0
fig|82301.12.peg.541	0	0	0	0	0	0	0	0	0	0	0	0
fig|82301.12.peg.542	0	0.48	0	0.5	0	0	0	0	0	0.5	0	0
fig|82301.12.peg.543	0	0	0	0	0	0	0	0	0	0	0	0
fig|82301.12.peg.544	0	0	0	0	0	0	0	0	0	0	0	0
fig|82301.12.peg.545	0	0	0	0	0	0	0	0	0	0	0	0
fig|82301.12.peg.546	0	0	0	0	0	0	0	0	0	0	0	0
fig|82301.12.peg.547	0	0	0	0	0	0	0	0	1	0.5	0	0
fig|82301.12.peg.548	0	0	0	0	0	0	0	0	0	0	0	0
fig|82301.12.peg.549	0	0	0	0	0	0	0	0	0.5	1	0	0
fig|82301.12.peg.55	0	0	0	0.5	0	0	0	0	0	0	0	0
fig|82301.12.peg.550	0	0	0	0	0	0	0	0	0	0	0	0
fig|82301.12.peg.551	0	0	0	0	0	0	0	0	0	0	0	0
fig|82301.12.peg.552	0	0	0.94	0	0	0	0	0	1	1	0	0
fig|82301.12.peg.553	0	0	0	0	0	0	0	0	0	0	0	0
fig|82301.12.peg.554	0	0	0	0	0	0	0	0	0	0	0	0
fig|82301.12.peg.555	0	0	0	0	0	0	0	0	0	0	0	0
fig|82301.12.peg.556	0	0	0	0	0	0	0	0	0	0	0	0
fig|82301.12.peg.557	0	0	0	0	0	0	0	0	0	0	0	0
fig|82301.12.peg.558	0	0	0	0	0	0	0	0	0.5	0	0	0
fig|82301.12.peg.559	0	0	0	0	0	0	0	0	0	0	0	0
fig|82301.12.peg.56	0.5	0	0	0	0	0	0	0	0	0	0	0
fig|82301.12.peg.560	0.5	0.5	1	0	0	0	0	0	0	0	0	0
fig|82301.12.peg.561	0	0	0	0	0	0	0	0	1	0	0	0
fig|82301.12.peg.562	0	0	0	0	0	0	0	0	0	0	0	0
fig|82301.12.peg.563	0	0	0	0	0	0	0	0	0	0	0	0
fig|82301.12.peg.564	0	0	0	0	0	0	0	0	0	0	0	0
fig|82301.12.peg.565	1	3	2	1	0	0	0	0	18	6	0	0
fig|82301.12.peg.566	0	0	0	0	0	0	0	0	0	0	0	0
fig|82301.12.peg.567	0	0	0	0	0	0	0	0	0	0	0	0
fig|82301.12.peg.568	0	0	0	0	0	0	0	0	0	0	0	0
fig|82301.12.peg.569	0.5	0.5	0	0	0	0	0	0	1	0.5	0	0
fig|82301.12.peg.57	0	0	0	0	0	0	0	0	0	0	0	0
fig|82301.12.peg.570	0	0	0	0	0	0	0	0	0	0	0	0
fig|82301.12.peg.571	0	0	0	0	0	0	0	0	0	0	0	0
fig|82301.12.peg.572	0.5	0.5	0.5	0	0	0	0.5	0	0.5	0	0	0
fig|82301.12.peg.573	0	1	0	0	0	0	0	0	0	0	0	0
fig|82301.12.peg.574	0	0	0	0	0	0	0	0	0	0	0	0
fig|82301.12.peg.575	0	0	0	0	0	0	0	0	0	0	0	0
fig|82301.12.peg.576	0	0	0	0	0	0	0	0	0	0	0	0
fig|82301.12.peg.577	0	0	0	0	0	0	0	0	0	0	0	0
fig|82301.12.peg.578	1	1	0.5	0	0	0	0	0.5	0.5	1	0	0
fig|82301.12.peg.579	0	0	0	0	0	0	0	0	0.5	1	0	0
fig|82301.12.peg.58	0	0	0	0	0	0	0	0	0	0	0	0
fig|82301.12.peg.580	0	0	0	0	0	0	0	0	0	0	0	0
fig|82301.12.peg.581	0	0	0	0	0	0	0	0	0	0	0	0
fig|82301.12.peg.582	0	0	0	0	0	0	0	0	0.16	0	0.17	0
fig|82301.12.peg.583	0	0	0	0	0	0	0	0	0.33	0	0.32	0
fig|82301.12.peg.584	0	0	0	0	0	0	0	0	0	0	0	0
fig|82301.12.peg.585	0.5	0	0	0	0	0	0	0.5	0	0.5	0	0
fig|82301.12.peg.586	0	0	0	0	0	0	0	0	1	0	0	0
fig|82301.12.peg.587	0	0	0	0	0	0	0	0	0	0	0	0
fig|82301.12.peg.588	0	0	0	0	0	0	0	0	0	0	0	0
fig|82301.12.peg.589	0	0	0	0	0	0	0	0.5	0.5	0	0	0
fig|82301.12.peg.59	0	0	0.5	0	0	0	0	0	1.5	1.5	0	0
fig|82301.12.peg.590	0	0	0	0	0	0	0	0	0	0	0	0
fig|82301.12.peg.591	0	0	0	0	0	0	0	0	0	0	0	0
fig|82301.12.peg.592	0	0	0	0	0	0	0	0	0	0	0	0
fig|82301.12.peg.593	0	0	0	0	0	0	0	0	0	0	0	0
fig|82301.12.peg.594	0	0	0	0	0	0	0	0	0	0	0	0
fig|82301.12.peg.595	0	0	0	0	0	0	0	0	0	0	0	0
fig|82301.12.peg.596	0	0	0	0	0	0	0	0	0	0	0	0
fig|82301.12.peg.597	0	0	0	0	0	0	0	0	0.5	1	0	0
fig|82301.12.peg.598	0	0	0	0.5	0	0	0	0	0	0	0	0
fig|82301.12.peg.599	0	0	0	0	0	0	0	0	0	0	0	0
fig|82301.12.peg.6	0	0	0	0	0	0	0	0	0	0	0	0
fig|82301.12.peg.60	0	0	0	0	0	0	0	0	0	0	0	0
fig|82301.12.peg.600	1.81	1.64	0.81	0	0	0	0	1	1.72	1.61	0	0
fig|82301.12.peg.601	0	0	0	0	0	0	0	0	0	0	0	0
fig|82301.12.peg.602	4.5	7.5	5	3	0	0	0	1	8	8.5	0	0
fig|82301.12.peg.603	0	0	0	0	0	0	0	0	0	0	0	0
fig|82301.12.peg.604	0	0	0.31	0	0	0	0	0	0.38	0	0	0
fig|82301.12.peg.605	2	2.5	3.17	0	0	0	0	0.5	5.08	3.5	0	0
fig|82301.12.peg.606	0	0	0	0	0	0	0	0	0	0	0	0
fig|82301.12.peg.607	0	0	0	0	0	0	0	0	0.5	0	0	0
fig|82301.12.peg.608	0	0	0	0	0	0	0	0	0	0	0	0
fig|82301.12.peg.609	0	0	0.5	0.5	0	0	0	0.5	0	0	0	0
fig|82301.12.peg.61	0	0	0	0.5	0	0	0	0	0.5	1	0	0
fig|82301.12.peg.610	0	0	0	0	0	0	0	0	0	0	0	0
fig|82301.12.peg.611	0.5	2	0.5	0	0	0	0	0.5	0.5	0.5	0	0
fig|82301.12.peg.612	0	0	0	0	0	0	0	0	0	0	0	0
fig|82301.12.peg.613	0	0	0	0	0	0	0	0	0.02	0	0	0
fig|82301.12.peg.614	0	0	0	0	0	0	0	0	0	0	0	0
fig|82301.12.peg.615	0.5	0	0.5	0	0	0	0	0	1	0	0	0
fig|82301.12.peg.616	0	0	0	0	0	0	0	0	0	0	0	0
fig|82301.12.peg.617	0	0	0	0	0	0	0	0	0	0	0	0
fig|82301.12.peg.618	0	0	0	0	0	0	0	0	0	0	0	0
fig|82301.12.peg.619	0	0	0	0	0	0	0	0	0	0	0	0
fig|82301.12.peg.62	0	0	0	0	0	0	0	0	0	0	0	0
fig|82301.12.peg.620	0	0	0	0.5	0	0	0	0	1	0	0	0
fig|82301.12.peg.621	0	0	0	0	0	0	0	0	1.22	0	0	0
fig|82301.12.peg.622	0	0	0	0	0	0	0	0	0	0	0	0
fig|82301.12.peg.623	0	0	0	0.5	0	0	0	0	2	0.5	0	0
fig|82301.12.peg.624	0	0	0	0	0	0	0	0	0	0	0	0
fig|82301.12.peg.625	0	0	0	0	0	0	0	0	0	0	0	0
fig|82301.12.peg.626	0	0	0	0	0	0	0	0	1.5	3	0	0
fig|82301.12.peg.627	0	0	0	0	0	0	0	0	0	0	0	0
fig|82301.12.peg.628	0	0	0	0	0	0	0	0	0	0	0	0
fig|82301.12.peg.629	0	0	0	0	0	0	0	0	0	0	0	0
fig|82301.12.peg.63	0	0	0	0	0	0	0	0	0	0	0	0
fig|82301.12.peg.630	0	0	0	0	0	0	0	0	0	0	0	0
fig|82301.12.peg.631	0	0	0	0	0	0	0	0	0	0	0	0
fig|82301.12.peg.632	0	0	0	0	0	0	0	0	0	0	0	0
fig|82301.12.peg.633	0	0	0	0	0	0	0	0	0.71	0	0	0
fig|82301.12.peg.634	0	0	0	0	0	0	0	0	0	0	0	0
fig|82301.12.peg.635	1	0	0	0	0	0	0	0	0	0.5	0	0
fig|82301.12.peg.636	0.5	1	0.5	0.5	0	0	0	0	0	0	0	0
fig|82301.12.peg.637	0	0	0	0	0	0	0	0	0	0	0	0
fig|82301.12.peg.638	0	0	0	0	0	0	0	0	0	0	0	0
fig|82301.12.peg.639	0.5	0.5	0	0	0	0	0	0.5	0.5	3	0	0
fig|82301.12.peg.64	0	0	0	0	0	0	0	0	0	0	0	0
fig|82301.12.peg.640	0	0	0	0	0	0	0	0	0	0	0	0
fig|82301.12.peg.641	2	2	2.5	0.5	0	0	0	0	0.5	0	0	0
fig|82301.12.peg.642	0.5	0	0.5	0.5	0	0	0	0	0.5	1.5	0	0
fig|82301.12.peg.643	0	0	0	0	0	0	0	0	0	0	0	0
fig|82301.12.peg.644	0	0	0	0	0	0	0	0	0	0	0	0
fig|82301.12.peg.645	0	0	0	0	0	0	0	0	18	6.5	0	0
fig|82301.12.peg.646	0	0	0	0	0	0	0	0	1	0.5	0	0
fig|82301.12.peg.647	0	0	0	0	0	0	0	0	0	0	0	0
fig|82301.12.peg.648	0	0	0	0	0	0	0	0	0	0	0	0
fig|82301.12.peg.649	0	0	0	0	0	0	0	0	0	0	0	0
fig|82301.12.peg.65	0	0	0	0	0	0	0	0	0	0	0	0
fig|82301.12.peg.650	0	0	0	0	0	0	0	0	0	0	0	0
fig|82301.12.peg.651	0	0	0	0	0	0	0	0	0	0	0	0
fig|82301.12.peg.652	0	0	0	0	0	0	0	0	0	0	0	0
fig|82301.12.peg.653	0	0	0	0	0	0	0	0	0	0	0	0
fig|82301.12.peg.654	0	0	0	0	0	0	0	0	0	0	0	0
fig|82301.12.peg.655	0	0	0	0	0	0	0	0	1.5	0.5	0	0
fig|82301.12.peg.656	0	0.5	0.5	0	0	0	0	0	0	1	0	0
fig|82301.12.peg.657	0	0	0	0	0	0	0	0	0	0	0	0
fig|82301.12.peg.658	0	0	0	0	0	0	0	0	0	0.5	0	0
fig|82301.12.peg.659	0	0	0	0	0	0	0	0	0	0.5	0	0
fig|82301.12.peg.66	0	0	0	0	0	0	0	0	0	0	0	0
fig|82301.12.peg.660	0	0	0	0	0	0	0	0	0	0	0	0
fig|82301.12.peg.661	0	0	0	0	0	0	0	0	0	0	0	0
fig|82301.12.peg.662	0	0	0	0	0	0	0	0	0	0	0	0
fig|82301.12.peg.663	0	0	0	0	0	0	0	0	0	0	0	0
fig|82301.12.peg.664	0	0	0	0	0	0	0	0	0	0	0	0
fig|82301.12.peg.665	3	3.46	2.95	1	0	0	0	0.5	3	3.5	0	0
fig|82301.12.peg.666	0	0	0	0	0	0	0	0	0	0	0	0
fig|82301.12.peg.667	0	0	0	0	0	0	0	0	0	0	0	0
fig|82301.12.peg.668	0	0	0	0	0	0	0	0	0	0	0	0
fig|82301.12.peg.669	0	0	0	0	0	0	0	0	0	0	0	0
fig|82301.12.peg.67	0	0	0.5	0	0	0	0	0	0	0.5	0	0
fig|82301.12.peg.670	0	0	0	0	0	0	0	0	0	0	0	0
fig|82301.12.peg.671	0	0	0	0	0	0	0	0	0	0	0	0
fig|82301.12.peg.672	0.5	0	0.5	1.5	0	0	0	0	0.5	0	0	0
fig|82301.12.peg.673	0	0	0	0	0	0	0	0	0	0	0	0
fig|82301.12.peg.674	0	0	0	0	0	0	0	0	0	0	0	0
fig|82301.12.peg.675	0	0	0	0	0	0	0	0	0	0	0	0
fig|82301.12.peg.676	0	0	0	0	0	0	0	0	1.5	1	0	0
fig|82301.12.peg.677	4	0	3.5	0	0	0	0	0.5	3	2.5	0	0
fig|82301.12.peg.678	0	0	0	0	0	0	0	0	0	0	0	0
fig|82301.12.peg.679	0.5	0	0	0	0	0	0	0	2	0	0	0
fig|82301.12.peg.68	0	0	0	0	0	0	0	0	0	0	0	0
fig|82301.12.peg.680	4.99	2	2.5	0	0	0	0	0.5	1.5	5	0	0
fig|82301.12.peg.681	0.5	1	0	0	0	0	0	0	2	1	0	0
fig|82301.12.peg.682	0	0	0	0	0	0	0	0	0	0	0	0
fig|82301.12.peg.683	0	0	0	0	0	0	0	0	0	0	0	0
fig|82301.12.peg.684	0.5	0.5	1.5	0	0	0	0	0	0	1.5	0	0
fig|82301.12.peg.685	0	0	0	0	0	0	0	0	0	0	0	0
fig|82301.12.peg.686	0	0	0	0	0	0	0	0	0	0	0	0
fig|82301.12.peg.687	0	0	0	0	0	0	0	0	0	0	0	0
fig|82301.12.peg.688	0	0	0	0	0	0	0	0	0	0	0	0
fig|82301.12.peg.689	0	0	0	0	0	0	0	0	0	0	0	0
fig|82301.12.peg.69	0	0	0	0	0	0	0	0	1.5	0	0	0
fig|82301.12.peg.690	0	0	0	0	0	0	0	0	0	0	0	0
fig|82301.12.peg.691	0	0	0	0	0	0	0	0	0	0	0	0
fig|82301.12.peg.692	0	0	0	0	0	0	0	0	0	0	0	0
fig|82301.12.peg.693	0	0	0	0	0	0	0	0	0	1.5	0	0
fig|82301.12.peg.694	1.5	0	0	0.55	0	0	0	0.5	0.5	0	0	0
fig|82301.12.peg.695	0.5	0	0	0	0	0	0	0	0.5	0.5	0	0
fig|82301.12.peg.696	0	0	0	0	0	0	0	0	0	0	0	0
fig|82301.12.peg.697	0	0	0	0	0	0	0	0	0	0	0	0
fig|82301.12.peg.698	3	2	1	1	0	0	0	0.5	2.5	2	0	0
fig|82301.12.peg.699	0	0	0	0	0	0	0	0	0	0	0	0
fig|82301.12.peg.7	0	0	0	0	0	0	0	0	0	0	0	0
fig|82301.12.peg.70	0	0	0	0	0	0	0	0	0.5	1	0	0
fig|82301.12.peg.700	0	0	0	0	0	0	0	0	0	0	0	0
fig|82301.12.peg.701	0	0	1	0	0	0	0	0.5	0	0.5	0	0
fig|82301.12.peg.702	0	0	0	0	0	0	0	0	0	0	0	0
fig|82301.12.peg.703	0	0	0	0	0	0	0	0	0	0	0	0
fig|82301.12.peg.704	0	0.5	0	0.5	0	0	0	0	8.5	2.5	0	0
fig|82301.12.peg.705	0	0	0	0	0	0	0	0	0	0	0	0
fig|82301.12.peg.706	0.5	0	1	0	0	0	0	0	0	0	0	0
fig|82301.12.peg.707	0	0	0	0	0	0	0	0	0.5	2.5	0	0
fig|82301.12.peg.708	0	0	0	0	0	0	0	0	0	0	0	0
fig|82301.12.peg.709	0	0	0	0	0	0	0	0.5	0	0	0	0
fig|82301.12.peg.71	0	0	0	0	0	0	0	0	0	0	0	0
fig|82301.12.peg.710	0	0	0	0	0	0	0	0	0	0	0	0
fig|82301.12.peg.711	0	0	0	0	0	0	0	0	0.5	0	0	0
fig|82301.12.peg.712	0	0	0	0	0	0	0	0	0	0	0	0
fig|82301.12.peg.713	0	0	0	0	0	0	0	0	0.5	1	0	0
fig|82301.12.peg.714	0	0	0	0	0	0	0	0	2.5	1	0	0
fig|82301.12.peg.715	0	0	0	0	0	0	0	0	0	0	0	0
fig|82301.12.peg.716	0	0	0	0	0	0	0	0	0	0	0	0
fig|82301.12.peg.717	0	0	0	0	0	0	0	0	0	0	0	0
fig|82301.12.peg.718	0	0	0	0	0	0	0	0	0	0	0	0
fig|82301.12.peg.719	0	0	0	0	0	0	0	0	0	0	0	0
fig|82301.12.peg.72	0.99	0	0.5	0.5	0	0	0	0.5	0.49	0.49	0	0
fig|82301.12.peg.720	0	0	0	0	0	0	0	0	0	0	0	0
fig|82301.12.peg.721	0	0	0	0	0	0	0	0	0	0	0	0
fig|82301.12.peg.722	0	0	0	0	0	0	0	0	0	1	0	0
fig|82301.12.peg.723	0	0	0	0	0	0	0	0	0	0	0	0
fig|82301.12.peg.724	0	0	0	0	0	0	0	0	0	0	0	0
fig|82301.12.peg.725	0	0	0.5	0	0	0	0	0	0	0	0	0
fig|82301.12.peg.726	0.5	0	0	0	0	0	0	0	0.5	0	0	0
fig|82301.12.peg.727	0	0	0	0	0	0	0	0	0	0	0	0
fig|82301.12.peg.728	1	0	0.5	0	0	0	0	0	1	1.5	0	0
fig|82301.12.peg.729	0	0	0	0	0	0	0	0	1	0	0	0
fig|82301.12.peg.73	0	0	1.44	0	0	0	0.5	0	0.38	0.5	0	0
fig|82301.12.peg.730	0	0	0	0	0	0	0	0	0	0	0	0
fig|82301.12.peg.731	0	0	0	0	0	0	0	0	0	0	0	0
fig|82301.12.peg.732	0	0	0	0	0	0	0	0	0	0	0	0
fig|82301.12.peg.733	0	0	0	0	0	0	0	0	0	0	0	0
fig|82301.12.peg.734	0	0	0	0	0	0	0	0	0	0.5	0	0
fig|82301.12.peg.735	0	0	0	0	0	0	0	0	1	0	0	0
fig|82301.12.peg.736	0	1	0	0	0	0	0	0	0	0	0	0
fig|82301.12.peg.737	0	0	0	0	0	0	0	0	0	0	0	0
fig|82301.12.peg.738	1.5	1	0	0.5	0	0	0	0	1	1	0	0
fig|82301.12.peg.739	0	0	0	0	0	0	0	0	0	0	0	0
fig|82301.12.peg.74	0.67	0	0	0.86	0	0	0	0	0	0.28	0	0
fig|82301.12.peg.740	0	0	0	0	0	0	0	0	0	0	0	0
fig|82301.12.peg.741	0	0	0	0	0	0	0	0	0	0	0	0
fig|82301.12.peg.742	0	1	0	0	0	0	0	0	0	0	0	0
fig|82301.12.peg.743	0	0	0	0	0	0	0	0	0	0	0	0
fig|82301.12.peg.744	0.17	0	0	0.12	0	0	0	0	1.38	0.5	0	0
fig|82301.12.peg.745	1	0.5	0	0	0	0	0	0	0	0	0	0
fig|82301.12.peg.746	0	0	0	0	0	0	0	0	0	0	0	0
fig|82301.12.peg.747	0	0	0	0	0	0	0	0	0	0	0	0
fig|82301.12.peg.748	0	0	0	0	0	0	0	0	0	0	0	0
fig|82301.12.peg.749	0	0	0	0	0	0	0	0	0	0	0	0
fig|82301.12.peg.75	0.01	0	0	0	0	0	0	0	0	0	0	0
fig|82301.12.peg.750	0	0	0	0	0	0	0	0	0	0	0	0
fig|82301.12.peg.751	3.5	2	0	1.5	0	0	0	0.5	5	2.5	0	0
fig|82301.12.peg.752	0.5	0.5	1	0.5	0	0	0	0.5	1.25	1.5	0	0
fig|82301.12.peg.753	0	0	0	0	0	0	0	0	0.21	0	0	0
fig|82301.12.peg.754	0	0	0	0	0	0	0	0	0	0	0	0
fig|82301.12.peg.755	0	0	0	0	0	0	0	0	0.44	0	0	0
fig|82301.12.peg.756	0	0	0	0	0	0	0	0	1	0	0	0
fig|82301.12.peg.757	0	0	0	0	0	0	0	0	0.5	0	0	0
fig|82301.12.peg.758	0	0.3	0	0	0	0	0	0	0.44	0	0	0
fig|82301.12.peg.759	0	0.01	0	0	0	0	0	0	0.19	0	0	0
fig|82301.12.peg.76	0	0	0	0	0	0	0	0	0	0	0	0
fig|82301.12.peg.760	0	0	0	0	0	0	0	0	0	0	0	0
fig|82301.12.peg.761	0	0	0	0	0	0	0	0	0	0	0	0
fig|82301.12.peg.762	0	0	0	0	0	0	0	0	0	0	0	0
fig|82301.12.peg.763	0	0	0	0	0	0	0	0	0	0	0	0
fig|82301.12.peg.764	0	0	0	0	0	0	0	0	0.5	0	0	0
fig|82301.12.peg.765	0	0	0	0	0	0	0	0	0	0	0	0
fig|82301.12.peg.766	0	0	0	0	0	0	0	0	0	0	0	0
fig|82301.12.peg.767	0	0	0	0	0	0	0	0	0	0	0	0
fig|82301.12.peg.768	0	0	0	0	0	0	0	0	0	0	0	0
fig|82301.12.peg.769	0	0	0	0	0	0	0	0	0	0	0	0
fig|82301.12.peg.77	0	0	0	0	0	0	0	0	0	0	0	0
fig|82301.12.peg.770	0	0	0	0	0	0	0	0	0	0	0	0
fig|82301.12.peg.771	0	0	0	0	0	0	0	0	0	0	0	0
fig|82301.12.peg.772	0	0	0	0	0	0	0	0	0	0	0	0
fig|82301.12.peg.773	0	0	0	0	0	0	0	0	0	0	0	0
fig|82301.12.peg.774	0	0	0	0	0	0	0	0	0	0	0	0
fig|82301.12.peg.775	0	0	0	0	0	0	0	0	0	0	0	0
fig|82301.12.peg.776	0	0	0	0	0	0	0	0	0	0	0	0
fig|82301.12.peg.777	0	0	0	0	0	0	0	0	0	0	0	0
fig|82301.12.peg.778	0	0	0	0	0	0	0	0	0	0	0	0
fig|82301.12.peg.779	0	0	0	0	0	0	0	0	0	0	0	0
fig|82301.12.peg.78	0	0.5	0	0.5	0	0	0	0	2	1.5	0	0
fig|82301.12.peg.780	0	0.5	0.5	0.5	0	0	0	0.5	0	0	0	0
fig|82301.12.peg.781	0	0	0	0	0	0	0	0	0	0	0	0
fig|82301.12.peg.782	0	0	0	0	0	0	0	0	0	0	0	0
fig|82301.12.peg.783	0	0	0	0	0	0	0	0	0	0	0	0
fig|82301.12.peg.784	0	0	0	0	0	0	0	0	0	0	0	0
fig|82301.12.peg.785	0	0	0	0	0	0	0	0	0	0	0	0
fig|82301.12.peg.786	0	0	0	0	0	0	0	0	0	0	0	0
fig|82301.12.peg.787	0	0	0	0	0	0	0	0	0	0	0	0
fig|82301.12.peg.788	0	0	0	0	0	0	0	0	0	0	0	0
fig|82301.12.peg.789	0	0.5	1	0	0	0	0	0	0	0.5	0	0
fig|82301.12.peg.79	0	0	0	0	0	0	0	0	0	0	0	0
fig|82301.12.peg.790	0	0	0	0	0	0	0	0	0	0	0	0
fig|82301.12.peg.791	0.5	0	0	0.5	0	0	0	0	1	4.5	0	0
fig|82301.12.peg.792	0	0	0	0	0	0	0	0	0.03	0.05	0	0
fig|82301.12.peg.793	0	0	0	0	0	0	0	0	0.46	0.94	0	0
fig|82301.12.peg.794	0	0	0	0	0	0	0	0	0	0	0	0
fig|82301.12.peg.795	0	0.5	0.5	0	0	0	0	0	0	0	0	0
fig|82301.12.peg.796	0	0	0	0	0	0	0	0	0	0	0	0
fig|82301.12.peg.797	0	0	0	0	0	0	0	0	0	0	0	0
fig|82301.12.peg.798	0	0	0	0	0	0	0	0	0	0	0	0
fig|82301.12.peg.799	0	0	0	0	0	0	0	0	0	0	0	0
fig|82301.12.peg.8	0	0	0	0	0	0	0	0	0	0	0	0
fig|82301.12.peg.80	0	0	0	0	0	0	0	0	0	0	0	0
fig|82301.12.peg.800	1.5	3	0	1	0	0	0	0	2	4	0	0
fig|82301.12.peg.801	0	0	0	0	0	0	0	0	0	0	0	0
fig|82301.12.peg.802	0	0	0	0	0	0	0	0	0	1	0	0
fig|82301.12.peg.803	0	0	0	0	0	0	0	0	0	0	0	0
fig|82301.12.peg.804	0	0	0	0	0	0	0	0	0	0	0	0
fig|82301.12.peg.805	0	0	0	0	0	0	0	0	0	0	0	0
fig|82301.12.peg.806	0	0	0	0	0	0	0	0	0	0	0	0
fig|82301.12.peg.807	0	0	0	0	0	0	0	0	0	0	0	0
fig|82301.12.peg.808	0	0	0	0	0	0	0	0	0	0	0	0
fig|82301.12.peg.809	0	0	0.5	0	0	0	0	0	0	0.5	0	0
fig|82301.12.peg.81	0	0	1	0	0	0	0	0	3	1	0	0
fig|82301.12.peg.810	3	2	2	2.5	0	0	0	0.5	3.5	3	0	0.5
fig|82301.12.peg.811	0	0	0	0	0	0	0	0	0	0	0	0
fig|82301.12.peg.812	0	0	0	0	0	0	0	0	0	0	0	0
fig|82301.12.peg.813	0	0	0	0	0	0	0	0	0	0	0	0
fig|82301.12.peg.814	0	0	0	0	0	0	0	0	0	0	0	0
fig|82301.12.peg.815	0	0	0	0	0	0	0	0	0	0.5	0	0
fig|82301.12.peg.816	0	0	0	0	0	0	0	0	0	0	0	0
fig|82301.12.peg.817	0	0	0	0	0	0	0	0	0	0	0	0
fig|82301.12.peg.818	0	0	0.5	0	0	0	0	0	0	0	0	0
fig|82301.12.peg.819	0	0	0	0	0	0	0	0	0	0	0	0
fig|82301.12.peg.82	0	0	0	0	0	0	0	0	0	0	0	0
fig|82301.12.peg.820	0	0	0	0	0	0	0	0	0	0	0	0
fig|82301.12.peg.821	0	0	0	0	0	0	0	0	0	0	0	0
fig|82301.12.peg.822	0	0	0	0	0	0	0	0	0	0	0	0
fig|82301.12.peg.823	0	0	0	0	0	0	0	0	0	0	0	0
fig|82301.12.peg.824	0	0	0.5	0.5	0	0	0	0	0.5	0.5	0	0
fig|82301.12.peg.825	1	1	2	0	0	0	0.5	1	2	0	0	0
fig|82301.12.peg.826	0	0	0	0	0	0	0	0	0	0	0	0
fig|82301.12.peg.827	0	0	0	0	0	0	0	0	0	0	0	0
fig|82301.12.peg.828	0	0	0	0	0	0	0	0	0	0	0	0
fig|82301.12.peg.829	0.5	0	0	0	0	0	0	0	0	1	0	0
fig|82301.12.peg.83	0	0	0	0	0	0	0	0	0	0	0	0
fig|82301.12.peg.830	0.5	0.5	0.5	1	0	0	0	0.5	1.45	1	0	0
fig|82301.12.peg.831	0	0	0	0	0	0	0	0	0	0	0	0
fig|82301.12.peg.832	0	0	0	0	0	0	0	0	0	0	0	0
fig|82301.12.peg.833	0	0	0	0	0	0	0	0	0	0	0	0
fig|82301.12.peg.834	0.5	0.5	1	0	0	0	0	0	1.5	0.5	0	0
fig|82301.12.peg.835	0	0	0	0	0	0	0	0	0	0	0	0
fig|82301.12.peg.836	0	0	0	0	0	0	0	0	0.5	0	0	0
fig|82301.12.peg.837	1	0.5	1	0.5	0	0	0	0.5	0	0	0	0
fig|82301.12.peg.838	0	0	0	0	0	0	0	0	0	0	0	0
fig|82301.12.peg.839	0	0	0	0	0	0	0	0	0	0	0	0
fig|82301.12.peg.84	0	0.5	0	0	0	0	0	0	1.5	0	0	0
fig|82301.12.peg.840	0	0	0	0	0	0	0	0	0	0	0	0
fig|82301.12.peg.841	0	0	0	0	0	0	0	0	0	0	0	0
fig|82301.12.peg.842	0	0	0	0	0	0	0	0	0	0	0	0
fig|82301.12.peg.843	1	0	0	0	0	0	0	0.5	2	2	0	0
fig|82301.12.peg.844	0	0	0	0	0	0	0	0	0	0	0	0
fig|82301.12.peg.845	0	0	0	0	0	0	0	0	0	0	0	0
fig|82301.12.peg.846	0	0	0.5	0	0	0	0	0	0.5	0.5	0	0
fig|82301.12.peg.847	0	0	0	0	0	0	0	0	0	0	0	0
fig|82301.12.peg.848	0	0	0	0	0	0	0	0	0	0	0	0
fig|82301.12.peg.849	0	0	0	0	0	0	0	0	0	0	0	0
fig|82301.12.peg.85	0	0	0	0	0	0	0	0	0	0	0	0
fig|82301.12.peg.850	2	1	1	1.5	0.5	0	0	0.5	7	2.47	0	0
fig|82301.12.peg.851	1.5	0.5	1.94	0.5	0	0	0	0	3	1.5	0	0
fig|82301.12.peg.852	0	0	0.03	0	0	0	0	0	0	0	0	0
fig|82301.12.peg.853	0	0	0	0	0	0	0	0	0	0	0	0
fig|82301.12.peg.854	0	0	0	0	0	0	0	0	0	0	0	0
fig|82301.12.peg.855	0	0	0	0	0	0	0	0	0	0	0	0
fig|82301.12.peg.856	1.65	1.94	1.36	0	0	0	0	0	0	0.45	0	0
fig|82301.12.peg.857	0.5	0	0	0	0	0	0	0	1	0.5	0	0
fig|82301.12.peg.858	0	0	0	0	0	0	0	0	0	0	0	0
fig|82301.12.peg.859	0	0	0	0	0	0	0	0	0	0	0	0
fig|82301.12.peg.86	0	0	0	0	0	0	0	0	0	0	0	0
fig|82301.12.peg.860	0	0	0	0	0	0	0	0	0	0	0	0
fig|82301.12.peg.861	0	0	0	0	0	0	0	0	1	0	0	0
fig|82301.12.peg.862	0	0	0	0	0	0	0	0	0	0	0	0
fig|82301.12.peg.863	0	0	0	0	0	0	0	0	0	0	0	0
fig|82301.12.peg.864	0	0	0	0	0	0	0	0	0	0	0	0
fig|82301.12.peg.865	0	0	0	0	0	0	0	0	0.5	0	0	0
fig|82301.12.peg.866	0	0	0	0	0	0	0	0	0	0	0	0
fig|82301.12.peg.867	0.5	0	0	0	0	0	0	0	0	0	0	0
fig|82301.12.peg.868	0	0	0	0	0	0	0	0	0	0	0	0
fig|82301.12.peg.869	0.5	0.5	0	0.5	0	0	0	0	0.5	3.5	0	0
fig|82301.12.peg.87	0	0	0	0	0	0	0	0	0	0	0	0
fig|82301.12.peg.870	0	0	0	0	0	0	0	0	0	0	0	0
fig|82301.12.peg.871	0	0	0	0	0	0	0	0	0.5	0.5	0	0
fig|82301.12.peg.88	0	0	0	0	0	0	0	0	0	1	0	0
fig|82301.12.peg.89	0	0	0	0	0	0	0	0	0	0	0	0
fig|82301.12.peg.9	0	0	0	0	0	0	0	0	0	0	0	0
fig|82301.12.peg.90	0	0	0	0	0	0	0	0	0	0	0	0
fig|82301.12.peg.91	0	0	0	0	0	0	0	0	0	0	0	0
fig|82301.12.peg.92	0	0	0.5	0	0	0	0	0	0	0.5	0	0
fig|82301.12.peg.93	0	0	0	0	0	0	0	0	0	0	0	0
fig|82301.12.peg.94	0	0	0	0	0	0	0	0	0	0	0	0
fig|82301.12.peg.95	0	0	0	0	0	0	0	0	0	0	0	0
fig|82301.12.peg.96	0	0	0	0	0	0	0	0	0	0	0	0
fig|82301.12.peg.97	0	0	0	0	0	0	0	0	0	0	0	0
fig|82301.12.peg.98	0	0	0	0	0	0	0	0	0	0	0	0
fig|82301.12.peg.99	0	0	0	0	0	0	0	0	0.66	0.25	0	0

## Sheet: Gutzwiller et al., 2015
gutzwiller_wmel_embryo0to2hr_a	gutzwiller_wmel_embryo0to2hr_b	gutzwiller_wmel_embryo2to4hr_a	gutzwiller_wmel_embryo2to4hr_b	gutzwiller_wmel_embryo10to12hr_a	gutzwiller_wmel_embryo10to12hr_b	gutzwiller_wmel_embryo12to14hr_a	gutzwiller_wmel_embryo12to14hr_b	gutzwiller_wmel_embryo18to20hr_a	gutzwiller_wmel_embryo18to20hr_b	gutzwiller_wmel_embryo22to24hr_a	gutzwiller_wmel_embryo22to24hr_b	gutzwiller_wmel_L1_a	gutzwiller_wmel_L1_b	gutzwiller_wmel_L2_a	gutzwiller_wmel_L2_b	gutzwiller_wmel_L3_12hrpostmolt_a	gutzwiller_wmel_L3_12hrpostmolt_b	gutzwiller_wmel_L3_darkbluegutPS_1to2_a	gutzwiller_wmel_L3_darkbluegutPS_1to2_b	gutzwiller_wmel_L3_lightbluegutPS_3to6_a	gutzwiller_wmel_L3_lightbluegutPS_3to6_b	gutzwiller_wmel_L3_cleargutPS_7to9_a	gutzwiller_wmel_L3_cleargutPS_7to9_b	gutzwiller_wmel_WPP_a	gutzwiller_wmel_WPP_b	gutzwiller_wmel_pupae_12hrpostWPP_a	gutzwiller_wmel_pupae_12hrpostWPP_b	gutzwiller_wmel_pupae_24hrpostWPP_a	gutzwiller_wmel_pupae_24hrpostWPP_b	gutzwiller_wmel_pupae_2dayspostWPP_a	gutzwiller_wmel_pupae_2dayspostWPP_b	gutzwiller_wmel_pupae_3dayspostWPP_a	gutzwiller_wmel_pupae_3dayspostWPP_b	gutzwiller_wmel_pupae_4dayspostWPP_a	gutzwiller_wmel_pupae_4dayspostWPP_b	gutzwiller_wmel_adultfemale_1dayposteclosion_a	gutzwiller_wmel_adultfemale_1dayposteclosion_b	gutzwiller_wmel_adultfemale_5dayposteclosion_a	gutzwiller_wmel_adultfemale_5dayposteclosion_b	gutzwiller_wmel_adultfemale_5dayposteclosion_c	gutzwiller_wmel_adultfemale_5dayposteclosion_d	gutzwiller_wmel_adultfemale_5dayposteclosion_f	gutzwiller_wmel_adultfemale_30dayposteclosion_a	gutzwiller_wmel_adultfemale_30dayposteclosion_b	gutzwiller_wmel_adultmale_1dayposteclosion_a	gutzwiller_wmel_adultmale_1dayposteclosion_b	gutzwiller_wmel_adultmale_5dayposteclosion_a	gutzwiller_wmel_adultmale_5dayposteclosion_b	gutzwiller_wmel_adultmale_5dayposteclosion_c
cds0	180.47	139.85	153.45	69.18	373.56	300.25	265.96	67.37	323.32	252.84	260.1	24.28	189.59	172.8	80.16	88.03	142.11	83.8	171.99	137.64	204.24	141.86	307.62	106.49	263.75	156.83	206.64	116.66	152.35	59.13	141.15	73.9	251.13	107.6	149.51	110.43	356.71	211.76	350.9	153.98	155.64	231.27	344.7	539.15	462.54	365.66	185.25	650.07	177.93
cds1	44.81	28.6	27.08	13.98	43.67	29.01	34.62	12.27	51.11	24.16	56.71	6	50.09	51.32	19.32	15.82	27.18	11.99	39.88	30.05	42.29	31.55	68.5	23.69	45.21	39.09	29.11	31.04	29.68	12	21.89	17.27	47.69	11.51	18.8	19.73	55.19	37.23	50.75	29.23	34.67	51.76	63.69	77.87	40.88	50.46	44.32	81.11	39.18
cds10	284.46	201.94	295.46	140.7	399.77	293.99	357.89	98.44	473.21	414.36	512.84	56.73	438.94	368.71	132.6	118.67	191.52	137.78	399.24	273.39	398.69	276.31	664.85	215.73	477.48	336.96	403.34	268.91	295.13	138.1	244.69	150.57	452.64	184.5	243.57	281.55	622.54	386.48	610.17	297.9	291.96	464.86	538.89	861.34	631.08	545.55	361.26	1010.84	372.26
cds100	0	0	0	0	0	0	0	0	0	0	0.09	0	0	0	0	0	0	0	0	0	0	0	0	0	0	0	0	0	0	0	0	0	0	0	0	0	0	0	0	0	0	0	0	0	0	0	0	0	0
cds1000	2.02	1.74	1.61	1.48	3.59	3.26	1.58	0.98	3.21	1.65	3.19	0.42	2.03	1	1.1	0.86	3.46	0.15	1.04	1.42	2.77	1.75	3.34	0.44	4.7	3.03	1.05	1.68	0.45	0.49	1.37	2.8	6.52	1.34	0.56	1.11	4.75	2.35	4.8	0.5	1.71	1.42	4.34	7.48	7.16	4.07	2.44	7.41	3.31
cds1001	0	0	0	0	0	0	0	0	0	0	0	0	0	0	0	0	0	0	0	0	0	0	0	0	0	0	0	0	0	0	0	0	0	0	0	0	0	0	0	0.14	0	0	0	0	0	0	0	0	0
cds1002	135.8	134.34	124.06	67.04	236.35	215	177.06	43.29	186.93	186.68	195.86	26.64	140.1	151.3	60.07	72.08	81.81	42.02	117.2	95.79	128.42	132.27	256.08	67.01	167.22	156.21	154.5	89.44	91.94	49.74	98.55	67.41	219.84	77.57	103.41	102.46	248.11	163.41	235	126.35	116.59	212.39	189.43	345.94	248.25	199.85	144.99	410.48	129.33
cds1003	418.46	276.64	326.56	177.74	723.79	423.11	404.24	128.31	584.34	453.74	606.67	84.74	462.71	409.14	190.56	150.93	236.02	138.26	371.49	304.04	437.97	369.88	705.11	210.6	532.64	336.23	495.84	269.94	372.25	126.41	294.85	160.81	607.46	190.85	308.91	274.14	761.03	398.58	729.91	342.89	286.72	525.56	580.91	1040.03	616.95	685.78	398.92	1174.46	366.51
cds1004	4.86	1.55	7.21	0	5.65	6.12	7.21	0	9.57	4.78	8.14	0.5	3.44	6.03	0.46	0.1	1.14	0	2.11	7.5	6.59	5.42	3.44	3.76	8.97	5.24	4.64	3.37	7.42	0	5.24	2.32	5.79	5.06	2.63	1.65	16.9	5.46	14.66	4.82	2.75	10.56	14.12	11.48	16.74	10.02	4.92	15.6	6.28
cds1005	90.48	53.78	76.25	31.46	136.45	64.41	90.15	34.09	113.75	98.69	104.78	14	107.72	98.07	39.61	30.07	47.5	28.5	103.15	78.61	126.15	84.35	168.81	55.38	155.62	82.23	87.24	65.92	70.3	28.2	79.31	35.6	121.66	61.5	71.04	63.8	151.01	113.17	172.44	70.95	74.73	137.86	172.06	267.23	165.26	148.73	126.71	273.89	103.41
cds1006	4.6	5.09	2.26	0.39	9	4.73	5.5	0	4.18	2.38	7.96	0.22	7.45	5.98	0	2.04	3.82	0	3.32	2.36	6.82	3.43	11.16	3.54	5.54	3.68	7.95	1.92	1.34	1.41	4.76	2.78	8.63	1.77	1.78	3.6	2.57	5.23	6.79	2.88	5.92	8.95	8.03	15.98	9.88	10.14	3.67	7.43	3.23
cds1007	63.69	43.52	72.79	25.63	114.18	71.86	95.68	15.1	103.76	90.17	101.44	6.52	80.79	66.64	28.9	19.87	39.19	27.37	81.2	52.07	88.19	63.81	119.57	50.69	68.7	51.88	71.4	48.06	50.15	19.68	44.38	32.31	86.92	30.62	57.11	40.67	118.78	61.82	118.53	67.53	56.19	149.41	115.48	184.32	135.49	107.68	79.14	161.64	74.47
cds1008	112.28	63.72	85.74	51.07	185.8	115.29	108.26	40.34	154	120.38	168.06	11.57	120.4	111.7	56.32	50.47	57.32	37.84	101.19	72.82	127.25	95.77	187.19	51.83	137.99	75.29	103.51	53.28	71.65	29.44	57.39	38.52	97.45	44.26	78.99	63.33	143.82	96.55	162.27	71.98	90.25	160.51	160.37	228.53	163.75	134.33	88.22	248.2	87.34
cds1009	138.86	110.04	132.55	92.05	203.65	152.04	168.85	61.33	198.58	191.93	222.31	19.3	176.65	118.7	48.43	48.94	58.55	50.88	143.28	153.97	177.95	193.92	326.7	101.78	245.47	151.83	190.78	114.05	126.75	54.72	118.33	66.78	267.18	96.2	112.51	119.79	341.07	176.83	316.19	189.21	138.67	262.33	285.46	422.29	353.88	239.99	174.71	583.09	180.17
cds101	1.84	2.61	2.19	1.95	4.81	0	0	0	0	1.91	1.4	0	1.03	2.97	2.59	1.11	0	0	2.66	3.3	3.5	2.07	6.8	1.27	2.39	1.67	0.48	0	0	0	1.93	0	1.81	0.86	1.66	1.18	4.03	1.63	6.61	3.34	4.6	1.01	3.62	8.55	4.48	2.65	3.41	6.77	4.41
cds1010	172.1	122.21	153.69	44.42	272.13	140.14	187.2	39.85	282.63	200.33	266.05	35.63	207.89	192.47	93.41	76.43	102.43	68.04	166.36	126.05	196.61	206.97	288.88	106	244.95	145.52	177.11	102.51	140.16	57.91	121.17	64.29	236.09	90.9	136.36	114.41	312	156.67	274.82	158.16	141.89	255.29	274.23	483.22	293.01	250.6	165.81	466.31	146.16
cds1011	57.97	53.87	58.66	16.72	111.81	79.7	70.18	20.81	75.37	87.91	84.41	5.92	65.41	92.68	31.99	20.39	24.29	28.9	71.46	58.21	80.03	57.24	130.61	37.86	91.41	55.97	80.35	42.96	66.38	21.93	46.55	28.49	105.07	33.52	58.58	44.08	114.14	71.33	127.41	68.55	63.34	94.73	116.99	200.77	124.46	119.03	70.88	182.86	62.22
cds1012	46.97	38.18	33.82	21.84	118.75	59.38	77.12	13.51	48.89	49.41	41.4	8	49.02	35.09	20.18	15.3	16.05	10.61	42	34.4	38.66	36.26	68.22	20.7	67.63	38.56	33.61	22.85	30.82	15.89	20.74	15.4	48.21	10.7	28.35	35.21	51.82	43.88	64.21	29.49	28.17	33.92	47.28	68.78	52.57	52.56	31.22	79.33	31.83
cds1013	45.06	39.98	46.25	26.75	106.32	85.88	60.37	25.68	71.99	72.74	82.13	7.3	51.15	40.59	34.58	22.22	28.18	9.99	42.01	42.12	53.68	52.55	89.4	32.12	64.66	35.8	41.48	23.45	25.63	10.48	23.34	11.21	58.5	20.82	40.88	28.29	49.82	33.22	79.74	27.38	28.34	72.73	63.04	100.48	54.47	45.23	38.82	103.12	36.81
cds1014	80.08	83.96	144.18	64.05	204.51	208.24	133.88	70	197.72	181.46	224.46	19.36	127.11	126.79	45.29	44.92	55.66	53.26	103.27	110.1	158.52	116.61	201.58	72.03	183.15	118.17	133.88	85.66	93.66	38.18	80.68	42.8	180.59	63.03	101.7	96.72	209.69	124.15	212.62	129.58	107.17	177.24	251.33	342.01	279.23	188.57	129.73	351.71	124.32
cds1015	419.58	303.39	389.08	208.52	737.28	572.07	437.64	154.85	577.36	559.22	628.15	52.65	481.16	435.08	197.92	173.31	253.09	157.11	407.24	351.05	467.39	460.73	737.64	300.65	588.33	394.87	496.97	303.14	364.41	181.72	277.86	172.02	597.81	243.68	319.98	284.68	737.27	473.29	724.63	366.88	358.55	706.37	816.42	1147.5	906.36	622.77	417.59	1134.48	410.06
cds1016	259.78	202.05	236.44	87.79	397.33	297.73	279.54	114.66	402.44	318.33	402.16	36.93	334.9	293.59	134.89	102.47	155.9	91.07	268	235.17	320.69	279.62	450.98	187.12	392.71	243.65	328.95	202.06	226	81.76	204.77	112.94	426.97	162.42	193.03	171.34	555.76	303.77	476.66	255.42	198.52	440.55	483.1	668.55	591.74	467.53	277.27	865.1	280.13
cds1017	8.94	2.49	6.8	3.59	7.37	3	6.59	0	12	6.07	5.32	0	8.6	2.88	1.5	0.62	0.85	1	6.66	12.78	8.42	9.39	12.85	2.98	8.61	6.9	8.4	7.78	5.4	4.2	5.32	2.63	3.38	4.83	8.1	3.74	11.49	8.6	8.36	4	4.46	20.86	8.73	21.6	15.22	10.78	9.88	16.67	7.59
cds1018	24.92	20.24	25.7	9.3	68.2	45.6	43.94	10.16	41.42	42.69	52.42	5.51	26.81	17.43	17.53	8.35	7.74	7.91	26.45	25.23	31.68	38.49	45.28	20.32	43.37	27.99	32.26	17.68	17.1	5.9	20.25	8.94	46.43	14.41	18.38	22.41	45.7	20.51	50.9	18.23	23.69	36.35	55.72	78.74	59.3	42.26	17.09	96.32	29.9
cds1019	51.48	30.78	64.86	39.84	135.61	128.45	70.16	16.22	100.79	80.99	103.02	11.54	61.5	45.36	28.03	31.27	32.26	22.82	60.46	50.16	72.48	48.57	133.79	50.83	95.31	62.68	54.42	37.83	43.37	15.58	39.12	21.67	75.69	30.2	40.04	45.46	103.31	51.33	87.49	37.41	38.1	79.75	114.79	152.75	113.32	84.79	50.98	158.59	58.29
cds102	76.9	54.49	51.22	24.82	109.66	98	98.92	29.29	144.36	90.02	138.25	14.91	105.83	67.6	39.73	35.26	66.38	36.5	80.66	56.75	77.73	79.58	147.7	52.06	141.49	79.13	97.05	49.66	64.26	35.59	62.01	31.86	113.59	34.33	67.58	68.03	130.89	85.93	152.19	59.87	61.37	114.91	145.35	196.95	164.93	116.2	78.64	252.32	75.89
cds1020	648.18	504.72	640.96	318.5	1181.95	818.26	852.07	298.28	1238.88	871.34	1161.33	110.82	857.34	764.17	368.54	306.1	455.02	303.3	576.4	460.49	749.42	543.49	1088.41	317.87	866.33	590.48	756.12	395.15	476.36	221.83	448.14	240.77	805.87	265.21	429.5	426.97	1211.1	618.93	1054.82	459.26	442.72	773.22	1006.52	1545.19	1068	937.62	588.05	1728.06	545.33
cds1021	5.09	3.18	1.6	9	5.06	7.65	10.16	0	6.25	5.26	5.39	2	3.42	6.51	3.53	0	0.94	1.79	2.7	5.94	2.4	0.57	7.53	4.95	9.08	0.01	6.67	5	1.92	2	0	4	7.61	2.87	2.42	4	8.55	3.59	8.08	2	4	5.66	5.57	8.01	9.13	7.6	7	10.49	7.69
cds1022	19.06	9.59	16.3	3.89	21.14	14.53	11.47	13	23.39	18.04	18.44	0	16.83	18.88	9.13	3.98	6.48	5.57	21.37	7.62	22.56	9.87	34.44	12.19	18.31	16	13.59	7.51	4.5	7.34	9.07	4.5	18.76	7.16	11.38	5	28.68	12.58	24.87	7.39	6.44	18.62	25.71	42.08	15.9	27.15	8.86	34.85	14.45
cds1023	8.44	3.05	5.44	0	2.43	17.48	5.01	4	14.5	9.62	18.06	3.35	43.46	35.57	22.9	16.79	5.05	5.91	33.82	8.17	48.99	15.98	79.09	27.1	43.34	27.66	34.92	28.01	27.28	9.66	51.41	26.01	87.47	30	22.08	23.5	38.6	27.82	25.79	13.08	9.84	22.62	29.5	40.12	40.74	50.48	45.99	71.21	27.36
cds1024	0	0	2.19	0	0	0	0	0	0	0	0	0	0	0	0	0	0	0	1.79	0.64	1	0.5	5	0	0.11	1.07	0	0	2	0	0	0	0	0	2.84	0	2	0	1	1	0	2	0.32	1.2	0.5	1.8	0	0	0.5
cds1025	92.27	63.54	90.29	38.23	129.37	78.82	105.37	13	159.02	113.92	194.87	7.94	108.32	93.07	27.55	27.28	31.82	24.94	124.06	92.72	148.42	105.47	169.47	71.78	157.96	93.43	120.2	99.58	105.91	39.03	109.2	57.72	187.5	81.41	94.09	91.8	268.37	176.51	242.32	200.2	171.69	248.4	214.34	404.85	314.56	232.28	155.16	498.73	248.99
cds1026	33.3	27.08	31.94	13	60.6	32.19	39.82	6.69	51.08	40.09	51.23	11.09	35.82	36	29.91	15	24.94	17.37	34.37	27.21	43.44	35.71	67.87	21.87	49.61	27.95	43.97	23.36	34.69	10.5	31.85	13.5	44.21	20.74	23.42	29.19	66.61	41.61	68.32	23.7	23.02	60.56	59.15	85.71	62.17	63.27	36.41	108.19	52.54
cds1027	49.21	41.11	48.1	22.24	102.8	53	62.9	14.88	86.89	86.52	83.04	4.22	71.14	60.83	29.13	19.86	30.84	25.29	64.95	34.23	61.33	62.87	99.83	30.31	78.91	50.63	50.98	34.42	45.65	22.1	23.71	21.71	61.31	35.4	43.79	28.33	98.77	66.22	114.47	47.4	55.2	94.13	85.5	134.42	95.5	87.15	55.68	155.73	67.94
cds1028	26.81	21.96	14.71	16.34	52.49	33.79	29.6	27.71	53.25	45.2	52.22	9.97	40.53	33.79	22.42	12.82	22.47	12.16	27.2	25.54	34.11	37.51	62.67	17.79	42.08	34.32	32.82	17.43	23.06	6.05	18.38	9.2	47.64	12.99	19.38	21.41	50.68	33.88	59.99	33.79	30.56	52.63	41.22	73.08	60.91	49.5	23.43	90.62	34.19
cds1029	40.82	31.67	44.56	18.25	37.87	28.36	43.82	8.24	66.16	46.14	94.79	7	65.76	37.29	11.65	10.99	20.77	9.44	67.07	47.47	68.45	57.81	120.86	39.78	98.24	59.68	81.08	50.46	32.38	22.58	50.75	35.34	94.76	45.33	54.34	51.55	133.89	76.74	123.48	63.27	41.84	89.42	99.82	180.4	127.36	110.21	57.6	229.7	55.97
cds103	84.11	71.49	125.13	48.6	124.39	85.6	110.13	41.36	132.77	130.07	162.73	18.18	104.67	107.17	43.67	32.99	35.5	29.49	103.5	99.45	141.54	111.89	199.24	65.05	168.79	112.52	129.83	90.6	77.33	32.56	74.27	30.87	184	62.21	85.92	71.55	210.53	109.04	254.71	87.03	108.26	224.65	207.71	325.52	258.85	178.47	117.01	314.94	133.49
cds1030	13.49	14.42	28.23	16.19	34.8	26.24	35.72	3.7	62.1	30.59	37.56	5.66	48.53	32.64	12.04	8.2	17.59	14.46	35.16	18.85	41.89	45.88	73.22	26.39	55.18	30.15	58.76	30.24	22.98	15.59	22.85	24.05	65.56	30.48	41.39	32.32	59.88	45.14	81.3	39.52	28.73	79.65	61.81	132.19	80.9	69.74	42.83	153.29	55.92
cds1031	142.72	100.9	127.28	64.59	259.89	190.44	174.72	48.44	192.45	165.05	207.66	23.65	183.45	184.42	65.36	70.77	66.4	59.38	171.72	148.6	184.17	179.21	271.39	91.84	218.56	157.83	201.68	118.1	147.22	58.21	125.66	80.3	232.58	86.77	129.73	129.86	244.99	182.83	309.01	139.12	146.4	292.91	274.13	457.53	283.83	288.27	171.63	460.29	197.74
cds1032	35.75	28	33.31	20.15	96.82	62.17	65.41	11.54	69.65	55.19	88.62	3.68	78.05	61.69	32.3	34.63	31.59	16.29	64.65	38.19	76.47	54.66	142.38	30.48	102.06	60.09	66.65	43.24	61.29	10.28	51.87	26.51	104.18	34.11	56.33	46.56	109.74	65.91	104.34	47.87	52.27	80.87	69.59	158.48	93.22	116.33	68.7	192.19	72.52
cds1033	43.46	33.26	56.61	23.2	82.63	53.19	50.71	8.6	57.26	74.27	75.27	4.63	75.11	51.18	33.36	29.42	17.96	24.59	50.17	50.87	74.5	47.68	92.49	43.16	87.25	47.96	60.12	36.22	36.02	26.56	42.57	34.84	115.27	28.23	36.43	33	92.18	52.65	81.53	46.23	44.76	87.78	77.64	108.93	102.52	96.66	55.58	126.9	66.92
cds1034	38.13	28.45	34.4	24.8	32.17	36.77	52.27	7.5	46.06	51.53	65.67	7.54	44.27	36.4	16.84	19.24	15	8.51	34.87	36.22	57.55	29.94	73.77	23.92	57.22	40.15	44.34	25.89	36.44	11	31.25	16.89	62.81	18.97	25.38	21.15	92.36	53.37	81.49	42.98	38.21	82.78	68.31	83.03	67.97	72.5	44.4	115.62	47.55
cds1035	33.56	30.68	23.52	9	47.09	26.24	46.46	9.41	45.91	45.52	50.51	4	36.33	21.54	19.73	10.13	16.51	9.52	32.15	26.5	56.27	32.12	72.14	20.85	59.8	28.6	31.71	23.87	27.55	15	22.78	13.44	72.11	19.59	35.62	17.54	72.33	40.41	66.5	28.66	26.9	60.47	42.1	93.57	54.42	59.12	42.63	114.32	43.59
cds1036	207.24	152.68	176.49	81.89	374.48	267.55	270.13	76.15	351.47	322.18	389.2	48.91	304.11	238.14	122.69	106.08	158.91	102.97	244.72	173.22	231.73	226.11	377.97	136.03	307.34	196.19	277.25	139.84	196.44	74.13	154.01	66.68	349	123.13	177.92	166.05	448.72	225.44	349.52	202.54	187.22	344.4	311.25	568.82	334.08	371.63	246.62	628.25	235.82
cds1037	13.41	11.46	15.7	6.53	22.68	15.71	21.76	2.43	18.19	24.32	26.51	3.47	14.55	6.09	11.84	7.07	4.77	5.58	16.5	11.67	18.6	11.08	34.19	8.65	17.57	17.88	23.35	10.75	13.3	2.44	7.4	9.67	25.94	9.3	18.57	18.3	28.26	24.38	25.36	8.96	10.92	20.3	22.36	46.24	30.51	26.92	14.17	43.07	16.7
cds1038	115.71	83.51	152.2	76.34	213.12	151.56	168.38	63.26	256.68	195.68	242.68	18.21	185.97	155.24	74.02	48.3	57.12	48.73	189.07	150.38	201.11	155.19	307.94	88.85	204.93	155.09	239.48	164.45	204.3	81.72	167.28	113.81	245.4	114.66	175.12	167.82	395.68	209.49	309.63	243.42	249.97	432.45	380.58	638.85	514.36	383.8	226.07	658.34	314.68
cds1039	72.16	54.12	50.88	26.47	94.87	55.7	79.9	20.87	118.04	100.38	101.76	10.43	86.29	67.41	27.21	32.87	42.49	25.71	72.94	54.73	77.14	75.88	143.37	35.93	83.28	63.14	86.98	60.52	49.15	20.11	59.23	20.93	94.12	37.59	49.27	47.51	131.89	79.08	114.04	64.73	63.07	109.49	75.42	193.97	107.81	117.35	60.06	202.82	64.83
cds104	21.5	7.64	11.86	1	22.99	18.7	9.47	2	28.52	32.97	131.7	5.94	114.7	133.51	374.48	369.46	117.16	29.98	297.46	155.64	510.6	234.96	798.77	136.52	411.2	207.68	432.87	211.1	467.69	142.7	717.21	285.18	1479.07	495.06	386.88	269.42	584.9	302.42	279.16	150.11	145.38	252.34	236.26	455.19	306.85	526.46	295.75	1013.22	257.53
cds1040	32.04	37.81	45.05	13	62.32	20.45	54.79	10.79	68	57.15	62.66	6.49	56.7	52.48	18.82	9.26	19.39	20.98	36.4	34.2	49.58	40.25	65.48	23.36	67.39	37.89	55.94	22.8	35.19	17.4	34.08	11.91	61.91	17.24	26.11	25.81	86.42	41.1	77.4	29.56	26.46	63.14	50.97	103.01	77.44	70.08	40.61	118.01	31.47
cds1041	37.65	17.63	34.68	14.64	102.4	39.34	58.23	18.77	25.43	45.77	25.16	1.54	31.14	40.05	23.14	29.93	29.09	23.32	42.46	31.39	55.86	44.86	66.05	28.08	54.84	50.74	46.42	31.57	30.29	10	23.12	16.99	67.05	19.25	43.43	38.67	62.63	36.81	76.21	30.32	28.38	59.18	71.71	94.37	74.63	75.74	18.35	103.22	48.62
cds1042	0.18	0	0	0	1.33	0.27	0.08	0	0.2	1.39	3.62	0	0.52	0.69	0	0.33	0	0	1	0.46	0.39	2.01	3.15	0	0.6	1.67	0	1.69	0.7	0	1.04	0	0	0	0.68	1.8	0	2.9	1.38	2.25	0.09	0	2.79	1.66	1.17	3.74	2.13	2.91	1.27
cds1043	0.92	1.62	1.33	0	1.72	0.66	1.31	0	1.1	2.15	1.03	0	0.36	0.58	0	1	0.98	1	1.99	1.7	1	0	4.52	0	0	1.95	5.4	1.42	1.08	0	1.33	0.76	1.93	0	3.56	1.04	2.36	0.76	2.48	1	1.23	1	1.5	2.3	2.19	3.55	2.88	4.93	2.04
cds1044	220.07	146.73	205.73	96.09	453.79	337.6	305.35	94.11	366.44	301.65	363.63	31.82	284.33	250.28	115.28	101.42	142.85	91.87	214.04	193.88	260.38	193.05	468.04	131.4	349.95	221.54	311.56	175.66	206.49	83.18	168.8	91.24	349.23	111.75	162.48	161.63	406.07	256.78	381.43	178.51	179.94	344.16	337.2	611.46	404.65	402.39	279.22	678.77	218.32
cds1045	56.19	33.13	40.85	14.23	108.26	52.42	47.21	17.82	84.42	61.22	66.65	6.35	66.47	53.58	33.71	18.74	38.32	27.62	52.95	46.47	63.39	49.29	90.2	26.93	70.02	47.2	65.36	40.26	43.56	21.89	39.27	17.82	65.04	32.03	33.32	37.82	108.76	55.81	101.98	48.58	39.95	87.47	75.53	147.88	103.52	104.02	50.55	178.41	67.1
cds1046	54.37	37.56	60.22	20.28	118.59	55.06	67.75	16.91	99.19	62.33	86.39	8.47	81.09	81.16	32.31	21.15	33.46	30.02	68.18	57.93	95.64	62.73	89.05	45.47	102.22	56.71	75.02	43.21	58.54	21.3	60.18	23.13	75.94	37.9	45.92	41.96	113.84	63.49	116.46	57.41	39.1	97.99	124.47	159.16	144.37	115.05	61.61	199.31	74.09
cds1047	14.15	4.38	8.94	8	12.05	14.89	6.41	6.5	15.1	6.5	10.91	2	3.69	7.89	2	2	6.03	2	7.96	5.72	14.49	10.21	28.32	7.68	15.43	12.55	8.89	6.75	6.82	2.02	8.96	3.8	9.69	6.08	7.1	6.83	24.49	10.72	23.1	6.15	14.1	18.37	18.45	35.19	31.14	13.78	11.31	37.24	7.52
cds1048	11.58	10.95	7.26	6.79	9.92	8.13	17.62	0	9.24	12.9	10.92	3	9.1	9.29	5.34	4.39	4.02	3.89	12.71	7.66	13.86	4.07	35.87	9.41	25.21	19.88	15.61	9.19	7.64	4.46	8.54	2	23.65	5.09	8.35	6.7	28.91	13.63	20.25	10.63	13.9	18.43	19.47	30.58	43.5	24.99	18.81	48.6	13.41
cds1049	6.57	11.5	11.17	8.59	15.45	4	18.05	0	11.25	6.9	11.56	0	5.34	12.25	2.65	4.52	4.37	4.08	7.59	10.51	15.55	11.33	20.48	8.52	27.42	19.07	15.25	9.22	12.32	3	8.9	5.63	15.23	6.33	15.09	7.56	28.41	19.79	22.62	12.37	8.93	23.44	29.05	41.12	17.13	19.32	18.96	31.01	10.73
cds105	52.32	50.1	46.54	15.2	110.17	60.96	70.91	11.89	86.05	63.36	76.05	1	50.09	45.96	19.07	18.18	20.2	18.12	45.64	37.31	45.25	42.13	82.29	33.77	68.54	50.89	64.76	38.22	40.56	9.03	51.46	23.28	87.53	45.13	55.18	45	104.74	71.11	88.97	68	47.5	76.73	86.27	149.55	133.66	122.71	82.5	220.62	61.85
cds1050	144.18	129.73	139.44	78.03	256.93	205.7	188.26	59.42	262.54	231.65	298.63	27.86	184.46	178.39	82.08	61.47	102.77	46.61	174.37	103.18	173.03	155.47	273.85	77.04	197.35	125.45	211.56	116.45	163.65	54.23	99.47	59	240	78.51	131.19	93.5	275.08	166.35	281.61	152.82	142	259.98	216.03	438.54	236.93	285.34	147.9	493.3	155.62
cds1051	89.61	64.15	72.49	52.23	157.41	115.55	99.06	38.94	173.92	123.2	151.07	17.39	85.15	65.06	53.14	42.8	70.65	24.19	83.87	55.13	84.06	87.78	137.46	57.47	133.09	56.54	103.14	65.45	67.69	31.68	70.47	33.04	115.73	55.85	69.37	73.66	160.95	99.79	158.31	73.34	81.78	144.5	146.77	237.94	203.72	163.26	113.23	299.8	106.29
cds1052	120.5	92.21	83.65	62.55	201.73	119.99	152.36	38.85	165.18	153.7	200.9	17.53	126.78	122.45	63.25	53.66	82.23	46.28	113.17	69.93	124.15	88.76	228.97	59.33	177.23	89.47	155.43	98.39	106.91	40.5	84.96	57.17	172.1	75	117.3	93.84	278.11	132.96	218.11	137.92	129.67	181.46	169.68	371.81	250.99	234.72	143.26	473.4	143.89
cds1053	100.91	84.63	112.46	63.29	247.88	200.29	133.21	48.59	166.72	151.02	212.26	20.79	138.23	105.46	70.4	57.84	77.18	60.26	101.38	58.85	131.04	77.49	184.09	64.51	138.31	97.63	119.07	73.82	97.06	39.67	81.35	51.88	148.34	59.7	90.52	89.39	211.36	115.3	196.65	108.18	94.63	143.53	151.09	310.78	209.92	216.83	111.74	353.71	110.81
cds1054	76.3	54.62	57.29	40.89	215.84	140.43	120.38	46.44	125.23	141.37	180.03	20.3	106.44	92	50.68	52.42	47.09	22.9	92.11	85.08	100.69	93.2	171.07	57.08	128.36	79.78	117.78	55.31	68.37	31.97	69.99	46.61	159.63	42.11	81.65	70.33	197.85	95.67	169.35	92.21	68.43	143.64	176.37	273.32	226.66	194.05	108.56	350.7	121.39
cds1055	153.64	115.3	154.72	67.37	349.25	236.58	198.93	48.77	271.04	306.58	391.06	23.28	248.2	227.23	140.46	80.63	88.66	60.26	265.08	126.41	305.18	152.66	436.43	138.88	333.46	162.35	295.26	178.11	192.35	103.11	237.52	99.27	364.94	144.95	206.93	189.49	565.6	303.75	384.15	242.97	216.3	310.26	477.36	731.03	657.99	519.67	298.75	942.7	346.18
cds1056	532.49	374.42	625.46	266.61	846.68	605.19	684.77	179.76	980.8	822.87	1228.38	112.93	874.02	817.42	497.49	451.4	324.27	266.12	842.24	551.96	1092.99	588.64	1437.75	478.45	1112.15	709.41	1167.09	718.35	951.69	468.37	915.73	574.99	1810.74	740.16	923.12	814.51	1928.77	1117.78	1607.11	1248.16	1251.68	1764.03	1621.92	2770.25	2439.55	1932.88	1193.92	3834.89	1806.44
cds1057	18.15	14.46	24.3	14.8	49.45	31.12	23.58	12.2	27.78	23.44	30.87	3.05	34.04	17.86	9.64	13.15	10.83	8.06	16.58	26.35	24.42	22.73	35.9	13.84	42.37	22.19	23.89	15.47	20.19	6.83	13.49	8	26.82	9.74	14.68	15.56	43.65	26.44	33.55	21.43	20.97	36.61	43.66	62.8	75.16	34.18	15.69	71.55	34.66
cds1058	34.8	18.61	27.53	26.47	100.63	88.54	42.06	27.69	52.28	62.23	53.65	8.25	68.56	46.26	24.54	29.18	32.2	20.84	42.16	34.86	83.94	49.64	107.37	29.96	81.04	57.04	55.06	44.95	41.56	14.26	59.13	25.1	89.13	29.03	48.37	40.36	66.72	46.89	78.33	40.09	33.05	76.79	80.79	110.85	75.77	74.79	32.64	116.33	39.04
cds1059	2.94	0	1.79	0.12	2.36	0	0.65	0	0.57	0.18	3.78	0	1.96	0.59	0.17	1.71	0	0	0.23	0.97	0.72	0	3.24	0.62	2.74	0.6	1.52	1.88	0.1	0	1	1.28	2.42	0	0	1.3	2.53	3.42	0.74	1.79	1	1.75	1.74	4.31	2.27	1.78	0	3.01	4.32
cds106	8.62	4.55	9.58	1.3	42.82	10.6	14.4	0	9.13	8.54	28.12	0	11.41	11.97	8.76	5.71	3.89	2	9.85	12.69	14.06	6.84	17.41	9.23	13.96	8.74	20.24	7.64	7.21	0.19	8.5	7.58	13.46	3.37	14.29	5	22.95	17.22	25.27	2	6.54	21.76	23.04	19.42	26.95	8.03	6.74	23.18	13.87
cds1060	0	0	0	0	0	0	0	0	0.37	0	0	0	0	0	0	0	0	0	0	0	0.25	0	1.39	0	0	0.74	0.5	0	0	0	0	0	0	0	0	0	0	0	0	0	0	0	0	0.92	1	0	0	0.5	0
cds1061	91.86	80.97	97.23	39.64	137.05	60.26	122.33	24.81	162.2	104.88	149	13.58	144.22	116.33	51.87	44.53	41.98	30.5	120.3	72.56	142.53	102.85	252.75	67.63	192.04	118.97	154.78	101.57	103.88	39.52	106.06	59.41	178.13	72.1	113.12	89.01	249.46	137.47	190.21	94.65	75.82	136.31	145.95	308.39	221.37	216.42	121.62	355.58	133.68
cds1062	58.64	51.92	68.25	20.06	121.01	51.64	79.76	7.16	149.51	81.8	113.7	20.29	89.04	85.17	55.99	41.82	50.94	28.4	74.11	59.31	85.04	81.67	128.75	55.28	109.77	48.18	102.64	44.39	57.87	23.62	51.5	32.11	118.43	37.16	59.84	46.29	121.51	61.51	119.77	51.33	57.87	122.69	126.22	163.02	107.18	109.7	58.51	201.22	68.74
cds1063	24.24	15	21.58	12.87	48.52	16	24.94	4	26.29	32.51	30.5	0	31	32.32	13.27	8.5	10	6	18.95	20.92	29.88	32.49	45	13.79	50.08	24.38	28.5	23.5	14.98	13	16	12.17	45.45	14.5	20	13	71	25.11	37.85	21.86	18.5	30.38	41.44	64.53	41.5	32.72	26	65.36	17.46
cds1064	104.82	65.56	98.84	39.81	195	123.01	120.94	21.48	172.23	101	187.69	16.61	161.46	102.87	47.71	25.1	43.1	37.93	112.88	87.79	149.24	96.94	226.78	72.7	173.18	103.21	140.3	66.88	93.56	44.74	90.97	62.95	168.72	55.59	96.13	77.56	249.4	130.44	177.8	140.28	113.81	187.42	167.21	301.61	244.41	212.18	132.79	384.73	128.45
cds1065	61.94	25.95	53.31	17.64	114.49	21.26	55.41	4.87	62.5	40.02	74.35	1.95	58.6	28.78	21.87	11.4	17.83	10.86	47.98	27.42	58.77	29.33	69.95	44.4	93.08	28.21	75.88	28.57	43.96	22.49	47.68	21.27	75.39	23.58	39.16	28.31	115.23	47.08	57.59	68.11	60.16	76.77	72.32	102.63	131.92	115.25	45.8	161.35	74.03
cds1066	0	0.23	0	0.28	0.08	0	0	0.7	0.11	0.19	0	0	0.08	0	0	0	0	0	0	0	0	0.11	0	0	1	0	0	0.26	0.08	0.04	0.06	0.05	0.32	0	0	0	0	0	1	0	0.35	0.22	0.36	0	0	0.09	0	0.13	0
cds1067	55.19	62.61	49.34	27.05	83.7	55.48	83.58	29.54	73.57	88.06	97.95	19.25	90.19	83.27	39.64	31.52	46.56	46	55.16	36.01	75.76	66.86	114.39	39.1	85.81	51.93	63.82	36	47.62	28.71	49.85	25.3	71.96	38.3	50.22	42.39	88.24	57.78	104.66	64.06	51.71	88.82	88.97	151.08	118.89	86.1	57.26	125.41	69.06
cds1068	65.64	39.95	73.02	20.85	159.22	99.54	86.39	31.77	89.28	94.07	122.59	14.03	105.1	82.9	44.24	30.79	31.09	33.3	65.3	54.68	94.49	74.79	119.54	49.39	110.96	58.74	81.9	46.2	55.58	27.44	57.57	32.31	111.49	44.5	49.4	57.32	114.89	72.39	87.87	59.13	71.65	101.18	130.74	153.54	154.45	98.63	60.4	180.61	74.66
cds1069	32.79	26.25	37.25	18.74	53.08	32.05	47.24	9	62.67	45.58	48.53	3.79	52.25	53.98	9.03	15.04	21.7	15.34	47.43	43.15	52.84	43.86	71.17	29.33	51.9	32.36	54.77	34.18	32.64	11.08	32.38	22.62	62.78	25.3	37.95	29.59	76.03	47.98	87.67	52.02	36.54	57.86	50.98	103.81	90.41	66.67	53.51	119.26	50.9
cds107	23.68	23.75	17.07	24.72	55.46	14.92	41.94	10.41	45.63	29.58	49.68	4.15	36.97	40.17	25.69	24.78	30.09	15.57	32.76	25.47	31.35	21.71	59.8	13.56	46.32	31.62	34.12	18.55	24.33	7.38	23.1	16.39	46.34	15.31	29.52	25.31	45.44	25.04	41.94	21.52	24.31	45.03	48.75	71.29	63.82	49.74	42.69	96.01	42.27
cds1070	27.21	20.14	20.22	11.11	52.85	25.87	30.38	9.88	15.95	20.22	14.04	0.58	20.11	20.41	6.01	8.81	17.41	11.52	26.86	13.22	23.16	22.07	35.56	19.15	36.81	19.81	33.42	16.55	21.64	6.71	2.41	10.11	29.97	10.14	14.36	13.19	21.47	21.45	56.21	9.86	15.92	31.03	41.99	73.56	44.43	43.7	15.96	50.28	16.66
cds1071	26.39	9.44	17.67	2	25.75	18.56	20.75	11.12	17.29	19.77	18	2.84	23.61	15.85	6	5.26	8.87	6.14	17.87	14.24	24.72	21.24	35.62	18.01	33.7	22.06	29.27	13.14	13.37	7.34	8.58	9.17	30.9	14.78	11.73	16.87	30.43	17.75	33.38	12.17	10.25	23.96	28.07	46.77	32.71	23.74	19.4	55.11	19.24
cds1072	82.43	80.23	59.94	44.24	114.62	126.45	69.56	34.13	116.57	86.88	107.58	23.7	94.66	96.02	30.99	30.3	39.42	27.02	66.02	51.38	105.22	85	152.83	34.99	107.92	100.66	83.88	55.17	68.23	27.47	54.15	32.07	120.38	36.54	63.6	51.03	143.11	95.3	151.04	57.5	46.1	124.81	140.77	217.38	142.17	125.43	96.82	249.71	65.26
cds1073	9.41	9.03	8.63	4.25	27.45	17.84	14.17	1.05	17.81	14.41	13.09	0.71	15.4	9.66	7.96	5.53	6.61	3.67	10.71	8.98	15.14	11.89	24.4	15.51	15.78	6.9	19.66	3.99	11.4	4.23	11.35	0	21.39	10.76	13.1	5.52	21.17	16.26	14.24	12.43	4.59	18.91	20.95	37.67	10.92	20.87	11.52	41.55	10.88
cds1074	159.61	112.07	155.86	101.56	328.95	209.78	182.34	50.89	280.76	200.17	225.18	36.71	217.69	206.6	79.73	83.55	98.02	83.69	159.79	135.45	172.78	171.42	294.37	93.6	230.57	163.56	191.18	119.64	143.06	48.39	98.45	64.14	216.88	84.57	112.73	111.86	245.19	166.39	269.81	134.54	106.55	238.55	269.27	376.84	319.78	245.23	142.47	451.67	139.44
cds1075	23.48	31.66	24.73	13.1	64.78	24.97	28.75	5.48	33.72	33.76	34.5	6.07	29.06	25.53	15.69	11.37	22.38	6.16	31.21	20.23	35.6	32.04	45.9	18.7	47.96	25.3	35.04	16.96	22.24	16.37	17.26	11.5	32.84	16.03	19.82	15.58	62.38	42.72	53.12	27.97	28.53	43.72	44.08	61.86	66.95	38.63	25.3	77.28	30.57
cds1076	86.8	65.49	86.6	23.23	260.8	116.44	140.77	30.55	164.05	146.87	164.02	13.95	153.58	191.57	61.02	73.49	70.02	54.14	116.57	110.28	121.27	102.95	191.18	72.99	131.46	108.09	161.71	102.45	89.12	43.2	85.82	63.41	183.34	84.14	106.03	111.51	212.29	155.53	226.42	185.89	171.78	299.09	244.36	394.99	346.38	216.84	138.19	415.32	247.7
cds1077	164.18	127.86	124.44	80.83	292.83	208.72	231.01	79.52	248.5	201.74	242.56	16.83	209.3	175.35	91.97	87.7	128.74	57.7	135.75	121.39	173.24	185.33	277.44	92.74	218.54	146.88	156.82	99.68	127.83	42.61	104.75	70.13	204.75	98.65	112.32	126.85	229.96	152.72	250.85	134.09	116.86	210.82	257.36	367.41	274.95	237.72	125.75	369.46	115.73
cds1078	0	0	1	2.5	1.5	1	0	0	0	0	0.5	0	0	1	0.5	1	0	0	0.5	2.73	3	1	1	0	2	0	2.5	1	5	0	0.5	0	5	1.5	0	0	0.5	2	2.5	0	1.06	0	0	3.5	1	0	1	3.5	1
cds1079	13.98	4.96	11.91	0	16.76	5.44	3.69	0	7.5	7.44	13	1	7.46	3.96	1	0	3.99	2	7.9	9.45	11.41	8.95	9.21	10.5	12.48	4.93	10.5	0.21	5	1	0	1.77	6.98	2	4	4	7.15	12.78	18.98	11.81	7.59	11.73	17.65	18.97	17.6	8	13.32	16.68	10
cds108	50.64	49.17	71.33	15.9	163.92	77.47	91.72	22.99	123.51	81.35	140.71	8.27	91.37	103.1	55.93	58.71	46.4	34.89	80.81	57.87	97.75	59.93	145.35	60.86	106.88	71.04	99.83	59.8	85.09	38.27	79.25	44.46	157.83	51.03	71.86	64.91	128.76	97.3	147.84	89.99	71.63	146.29	164.81	259.86	236.63	179.17	91.67	326.63	130.17
cds1080	108.39	86.88	93.06	47.53	186.73	125.99	120.51	34.14	160.34	141.24	158.21	16.36	128.53	135.61	46.97	33.08	61.39	40.45	99.56	85.77	146.59	87.79	208.53	69.8	159.35	98.36	126.11	75.23	84.76	35.59	75.47	40.09	130.8	52.11	79.24	68.71	199.79	114.47	176.78	78.73	70.13	143.96	158.88	252.7	164.7	157.29	131.25	274.62	93.12
cds1081	28.36	25.26	13.11	10.74	43.69	28.94	36.3	5.75	28.25	22.89	40.5	0	23.9	10.99	10.12	4.95	10.52	5.02	19.06	17.2	29.9	13.9	46.55	20.31	22.4	11.66	23.43	12.73	10.43	2.17	11.8	13.64	22.26	7.72	8.48	15.7	44.16	19.62	37.25	14.47	11.53	30.99	31.91	51.16	38.28	29.61	22.38	56.42	17.63
cds1082	25.7	19.15	27.97	9.35	63.75	39.73	37.28	9.51	57.79	28.8	52.95	7.08	46.82	24.04	17.43	12.78	12.07	10.34	34.89	19.43	55.97	32.87	72.19	11.74	59.76	38.13	39.07	23.83	23.27	12.88	19.91	13.42	39.77	13.9	27.1	22.95	70.2	35.15	63.13	33.83	36.02	56.85	48.79	79.54	69.3	62.65	30.16	101.34	35.88
cds1083	35.87	17.82	30.88	10.24	59.62	29.05	35.43	3	42.82	37.7	38.88	2.08	35.68	27.67	11.05	12	8.96	13.03	33.35	27.11	35.05	29.14	52.99	20.7	56.6	44.55	29.44	31.43	29.23	9.44	21.74	13.67	62.73	19	29.1	17.19	51.38	35.24	55.52	27.42	21.84	52.46	41.01	69.5	64.47	64.08	20.86	91.6	29.37
cds1084	49.77	38.68	54.43	22.18	105.03	51.06	66.33	18	101.54	75.04	84	4.5	72.52	52.39	26.84	18.68	21.82	16.08	73.21	47.4	77.24	62.89	108.97	42.15	93.55	59	63.12	43.7	59.9	25.15	49.89	24.48	96.8	33.42	67.02	44.68	111.03	67.99	93.48	61.66	54.75	92.15	137.58	209.29	137.44	112.08	50.23	226.87	82.87
cds1085	15.08	7.65	3.18	1.83	24.2	31.23	19.41	2	12.52	14.53	14.68	2	11.32	4.38	3.87	1.71	1.21	1	11	6.36	6.22	10.3	17.61	6.17	21.82	6.77	5.12	10.21	3.56	2.8	6.08	3.19	8.97	5.48	5.54	7.24	12.52	5.69	16.72	8.91	8.57	10.63	18.44	18.13	13.36	10.94	8.1	17.4	8.63
cds1086	5.98	0.71	1.03	1.72	7.56	5.83	5.27	0.26	3.77	3.19	3.46	2.35	5.53	2.87	3.64	1.43	1.53	0	4.05	1.9	5.68	4.38	6.44	1.29	4.38	5.95	12	5.68	3.86	0.53	2.33	1.9	5.01	2.17	4.44	3.85	5.61	3.02	6.79	1.23	1.35	9.2	9.41	3.68	5.75	7.06	4.43	12.92	5.8
cds1087	24.36	29.44	33.27	14.9	52.83	27.21	34.65	15.85	51.09	42.79	97.15	5.48	136.73	105.37	30.51	44.25	28.54	15.79	66.37	47.43	112.98	63.23	130.79	43.92	104.24	73.28	120.81	70.54	57.2	22.29	77.26	51.19	152.21	67.35	66.88	65.16	126.25	75.09	99.66	54.19	46.87	82.17	93.59	142.03	138.75	140.53	90.71	228.3	72.08
cds1088	81	68.67	83.9	56.17	177.98	121.64	140.39	26.42	132.23	113.59	142.33	17.05	102.55	83.6	35.26	26.87	56.26	35.3	94.45	67.57	95.73	118.24	177.42	65.97	135.65	62.91	97.93	67.28	55.97	32.93	50.39	44.09	110.28	47.87	57.47	65.39	152.1	112.3	173.74	61.93	69.9	117.44	146.68	223.11	179.32	143.75	83.75	231.21	84.48
cds1089	91.95	50.79	96.45	30.35	133.24	94.05	102.74	39	160.9	109.83	158.3	15.19	119.22	108.5	36.12	33.73	46.26	29.34	103.56	84.25	145.47	91	241.64	67.06	176.86	88.19	150.91	71.31	102.65	43.64	103.24	58.12	183.49	66.1	83.59	93.91	248.48	136.93	215.97	123.74	122.55	220.11	187.41	376.83	238.91	227.77	143.83	463.89	158.12
cds109	22.86	12.94	21.55	5.21	48.78	31.11	21.58	4.01	28.87	19.79	20.05	2.53	32.14	24.15	13.35	15.01	9.68	9.2	21.19	13.37	32.37	20.96	47.18	15.01	27.73	24.5	19.9	18.65	15.89	3.71	14.76	6.17	32.24	13.46	20.92	13.57	34.52	16.87	34.95	19.15	19.6	37.7	25.72	63.24	38.83	31.15	24.82	72.55	25.9
cds1090	146.94	99.47	124.66	54.94	212.99	120.56	166.86	37.63	226.58	201.99	199.38	23.14	157.19	135.89	58.54	61.84	78.28	41.75	145.51	107.76	164.06	129.51	307.48	97.13	259.65	139.15	212.99	83.1	112.59	53.09	100.97	60.92	243.05	91.59	128.63	114.45	320.79	172.18	244.39	138.68	113.61	230.72	211.34	403.29	279.97	236.38	148.62	439.93	138.61
cds1091	2.44	2.36	1.27	0	12.89	1	4.76	2	14.92	12.95	55.31	2	80.31	67.01	37.51	40.61	3.09	8.06	51.64	34.88	83.56	36.22	150.13	28.42	53.42	45.25	91.06	66.44	54.71	22.21	69.74	40.25	148.09	59.11	46.19	50.29	99.88	54.6	54.43	29.42	22.2	72.88	58.26	84.94	63.7	109.7	63.23	166.45	65.62
cds1092	138.71	121.7	135.1	63.92	326.12	210.72	176.33	51.93	215.97	226.42	286.17	38.4	201.37	196.66	97.75	87.03	84.81	73.34	160.53	149.66	203.87	198.94	283.45	134.45	237.7	141.07	190.37	129.56	148.95	70.8	118.14	80.77	273.51	117.33	129.19	122.71	310.46	190.19	281.92	156.62	144	256.16	287.42	435.07	334.32	262.7	163.5	477.39	185.86
cds1093	92.42	77.92	110.9	55.77	235.48	198.38	117.21	37.63	191.91	150.46	212.87	25.47	164.87	163.16	72.43	59.9	63.06	45.58	141.2	87.74	170.15	121.68	203.26	82.89	218.82	135.82	183.59	107.1	127.21	55.35	118.17	75.78	187.9	73.78	117.91	115.48	258.05	143.75	252.5	123.24	123.77	188.54	228.33	375.56	279.31	255.04	154.02	428.8	131.78
cds1094	169.48	136.31	168.69	72.57	268.29	189.06	202.35	55.51	246.74	228.48	360.29	42.21	301.49	268.74	110.98	107	87.46	60.38	213.86	131.32	270.78	144.49	448.22	144.19	322.7	216.66	341.13	206.09	212.08	99.9	214.24	131.35	408.54	159.85	184.73	200.75	537.81	265.79	410.54	170.29	161.69	251.02	314.69	547.77	432.16	441.06	304.03	847.83	252.01
cds1095	22.94	19.92	28.6	17.46	46.45	32.65	27.77	15.4	57.32	59.27	62.63	4.63	85.23	67.55	30.07	25.35	15.45	12.15	66.38	30.62	85.93	43.73	140	24.77	82.28	49.08	92.49	58.17	51.06	19.09	61.52	36.81	107.07	35.31	57.81	50.49	130.07	70.98	87.03	53.41	45.12	91.77	82.3	150.66	113.34	103.61	54.75	197.06	71.91
cds1096	2	1	3.97	2	4.45	2	3	0	1	4.95	5.66	0	2	3.82	0.27	1	3	0.5	1.26	3.58	7	4.61	3.33	2.83	1.42	1.92	2	1	4.5	0	1	1.04	2	2	1.5	0	6.8	2.12	4.3	2	3	2.82	7.21	9	14.16	5.29	7.39	15.13	2.04
cds1097	116.46	84.12	111.63	53.46	160.12	100.87	124.03	30.22	174.34	135.17	170.18	15.85	128.48	107.98	61.93	41.32	60.91	30.95	137.56	87.79	148.71	115.51	266.14	93.72	194.45	110.56	132.7	99.3	90.41	41.47	88.56	54.17	184.75	79.73	91.46	80.77	263.37	158.87	246.94	121.51	114.51	224.81	199.28	369.71	262.9	224.07	154.4	470.54	155.54
cds1098	14.47	5.6	7.32	8.18	17.31	4.39	8.69	2.47	25.39	20.62	96.36	6.67	155.18	149.53	275.57	261.7	57.87	28.66	299.03	165.1	497.97	227.55	826.13	135.37	348.58	229.66	318.05	199.59	348.01	127.89	530.07	275.43	1035	406.18	232.98	217.22	405.36	221.67	252.74	136.31	135.01	306.94	212.28	314.09	251.85	394	267.53	753.88	242.67
cds1099	39.72	29.26	34.47	11	70.33	44.51	47.51	16.1	48.97	53.96	66.84	9.77	44.3	32.79	21.29	14.6	17.42	16	39.85	35.63	48.95	45.65	87.54	31.16	68.73	49.7	47.13	37.44	31.78	12.56	32.62	14.79	46.26	21.46	29.34	24.82	57.99	61.73	73.14	24.39	25.28	65.29	77.81	132.1	86.46	76.74	35.61	125.93	44.5
cds11	203.06	156.4	175.89	88.29	295.5	201.67	233.3	97.21	348.59	268.56	373.77	30.34	314.25	238.93	112.39	82.49	194.67	89.05	221.82	153.93	273.23	178.6	444.6	116.17	262.17	193.74	315.51	160.69	170.56	78.43	189.06	97.91	340.41	126.37	149.59	133.92	470.82	232.14	366.57	160.96	157.42	292.71	264.04	563.56	297.83	366.89	231.84	752.75	190.34
cds110	47.7	33.32	41.64	13.69	96.4	53.1	61.72	9.08	64.02	39.27	77.2	1.62	85.87	85.03	51.1	38.22	30.8	31.38	84.3	40.7	81.36	43.84	124.5	51.78	86.72	73.8	66.72	36.87	59.57	27.1	49.69	39.19	110.51	51.45	51.96	55.99	110.18	69.25	113.48	61.89	48.48	137.24	115.56	200.38	148.83	94.63	65.22	190.41	108.05
cds1100	49.76	26.65	38.55	7	56.94	36.42	46.61	13.94	51.68	48.33	60.32	4.94	36.23	32.98	14.03	13.21	17.13	14.4	41.41	32.14	47.22	42.79	59.47	23.47	49.79	33.41	33.53	27.58	32.17	9.35	32.13	15.12	47.71	18.03	17.59	31.72	63.61	36.04	55.5	41.51	23.9	55.72	45.6	99.03	66.21	56.29	33.54	104.64	35.07
cds1101	0	0.39	0	0	0	0	0	0	0	0	0.5	0	0	0	0	0	0	0	0	1.23	0	0	0	0	0.2	0	0	0	0	0	0	0.78	0	0.25	0.34	0	0	1.37	0	0	0	0	0	0.77	0.23	0	0.46	0	0
cds1102	84.47	61.9	75.03	42.37	141.13	72.26	104.01	21.69	115.49	86.2	124.18	17.53	112.85	106.1	32.82	37.52	40.88	31.22	94.32	41.24	79.55	66.37	137.33	41.53	98.45	66.53	99.56	65.72	70.8	27.16	46.7	35.1	90.4	36.96	59.13	50.99	143.11	81.33	149.92	94.06	62.73	131.72	117.62	205.1	154.32	113.09	57.09	210.08	85.47
cds1103	151.81	110.33	159.29	62.86	285.63	224.17	190.47	49.32	189.79	232.98	223.41	16.19	154.67	162.11	70.11	64.37	51.72	51.1	168.59	155.14	205.37	148.92	289.32	96.08	202.33	125.84	185.14	99.66	125.28	47.16	100.96	67.02	205.66	78.96	132.78	110.65	282.13	195.96	325.32	192.62	175.1	382.31	268.47	619.08	363.05	269.47	204.45	515.06	248.62
cds1104	21.78	16.26	14.69	5.21	35.79	29.39	21.34	13.25	26.59	33.99	31.12	1	18.34	11.36	10.3	8.5	7.48	6.89	15.35	10.55	14.98	9.33	25.88	9.04	27.34	11.12	13.35	8.37	8.14	3.25	10.02	4.3	19.4	8.1	7.54	10.56	26.82	15.77	21.62	10.03	17.68	14.83	13.95	42.31	25.74	14.54	14.55	29.68	13.03
cds1105	34.43	41.04	35.43	13.75	95.95	40.13	48.48	11.92	65.69	45.93	63.89	8.32	66.78	58.2	34.62	28.45	33.4	18.44	36.03	36.8	50.5	39.08	83.6	24.36	55.99	42.96	53.59	27.13	37.01	16.91	17.63	16.72	51.73	20.83	28.66	33.89	60.21	34.33	78.35	22.92	27.85	45.3	55.62	120.46	60.01	60.73	42.75	105.89	40.6
cds1106	17.7	15.35	13.08	6.38	14.25	27.05	21.12	2	25.81	20.16	27.6	4	21.29	17.25	7.92	8.49	12.17	2.66	12	19.59	22.19	23.54	32.78	9.72	31.69	20.89	19.53	18.31	18.59	4.84	14.89	7.29	38.99	13.01	10.56	14.72	33.93	14.53	27.37	21.84	15.71	32.39	33.69	42.04	29.55	32.09	14.39	64.57	24.64
cds1107	321.6	216.79	269.38	107.59	477.86	280.2	359.42	108.24	373.57	358.2	342.97	40.77	291.04	206.54	79.34	100.36	109.88	99.8	207.23	224.5	240.57	236.09	446.28	179.64	322.17	217.8	240.74	166.9	163.32	83.88	134.66	80.98	292.42	112.16	147.61	137.61	301.69	237.4	339.55	161.83	169.05	320.73	325.06	510.01	357.49	290.3	214.15	482.63	194.13
cds1108	529.75	405.47	595.36	261.26	879.99	660.99	721.47	239.22	820.97	773.09	752.63	83.83	629.75	477.84	231.19	164.6	252.9	159.02	427.41	395.41	528.7	417.42	884.55	303.2	595.45	422.84	522.49	320.78	337.35	156.42	283.93	195.06	598.67	216.69	316.48	301.09	778.55	413.13	660.24	349.36	314.01	552.16	682.59	1039.01	724.08	621.49	417.15	1149.33	389.99
cds1109	34.08	24.63	29.03	7	64.28	38.4	36.95	9	56.43	47.07	44.16	7.44	48.02	42.93	16.11	15.79	17.45	20.7	26.75	33.4	40.86	23.26	72.48	22.48	49.67	30.03	47.27	39.2	21.51	10	28.77	16.59	56.93	26.49	36.05	25.74	64.09	26.2	63.34	25.2	25.68	56.37	58.75	93.4	69.67	46.01	33.06	104.45	36.73
cds111	14.12	15.01	22.35	9.26	59.14	25.43	16.55	4.05	26.37	17.68	22.36	3.46	21.82	20.6	16.94	13.37	15.46	8.35	15.5	19.86	32.19	20.39	36.14	15.2	28.52	18.16	11.99	18.18	26.08	3.26	14.97	6.73	35.78	12.96	23.56	17.58	30.12	11.91	28.75	16.88	18.11	36.89	30.91	37.71	27.41	33.79	14.89	53.29	20.39
cds1110	84.36	50.19	57.01	19	140.18	99.11	77.84	16.93	109.98	82.28	107.26	9.13	87.84	58.28	36.51	33.54	37.88	30.25	58.94	54.35	70.31	61.6	123.06	60.71	121.33	67	81.85	35.39	57.98	21.39	48.53	38.75	101.79	29.06	65.02	49.63	128.74	60.08	139.51	53.9	50.6	83.07	96.5	191.98	149.88	100.71	83.62	177.32	59.54
cds1111	93.89	63.24	146.31	47.53	165.39	129.6	117.09	45.74	201.2	145.61	227.62	16.67	131.93	104.03	60.29	45.6	52.23	36.81	106.06	113.97	180.69	129.72	204.73	100.84	182.37	135.91	159.07	102	89.21	45.56	99.22	49.42	180.37	74.58	105.16	81.32	253.22	137.71	279.21	110.59	100.73	163.66	227.28	348.73	279.06	234.3	134.32	437.63	154.46
cds1112	246.46	152.69	179.87	67.79	272.17	173.29	294.73	51.82	282.85	247.31	307.88	22.91	278.44	209.69	95.08	72.87	98.32	73.99	204.88	138.04	271.68	187.52	458.33	134.09	352.45	219.09	298.12	153.02	162.07	67.97	184.33	100.8	362.53	149.23	193.95	180.29	496.49	260.37	368.59	172.33	140.29	188.95	309.44	541.88	392.05	410.71	235.97	774.02	200.18
cds1113	240.68	168.77	219.23	116.8	443.43	304.49	258.2	99.37	373.42	303.36	422.6	47.59	373.67	329.15	164.93	128.93	221.96	134.22	254.78	175.34	293.47	213.08	501.28	156.61	387.38	242.76	309.53	167.33	228.59	101.15	214.32	111.54	351.29	140.59	170.72	186.99	494.16	309.02	424.62	187.24	175.06	303.96	406.55	669.27	475.99	376.86	263.41	780.36	219.76
cds1114	111.2	85.12	106.37	45.1	262.92	189.69	181.86	46.83	181.3	164.35	164.42	7.61	131.25	84.89	47.13	48.25	94.88	48.98	93.21	92.88	119.78	130.05	207.82	84.04	163.1	92.59	127.37	60.09	85.2	27.37	75.65	45.61	128.67	43.53	78.59	84.34	188.51	77.64	164.94	75.78	65.39	116.99	143.8	255.35	165.9	147.86	91.02	240.19	81.09
cds1115	52.05	41.8	67.09	30.81	148.91	118.74	108.55	20.28	104.46	74.4	77.04	15.65	82.61	55.39	31.18	28.3	45.8	33.26	52.1	60.64	70.34	81.48	122.51	48.4	97.54	57.42	82.82	52.7	48.33	25.7	43.54	20.87	87.51	26.12	54.77	51.89	88.79	62.7	92.4	35.74	51.84	88.75	105.56	136.97	111.43	83.17	57.72	150.95	52.69
cds1116	5	2.5	3.16	0	1.67	4	9	1	16.11	20.56	83.18	9.81	123.37	128.92	154.86	170.73	43.04	20.24	175.42	71.89	306.29	105.2	420.41	83.31	229.25	147.18	178.74	106.55	183.86	72.64	300.48	165.33	569.77	236.06	174.98	134.52	223.32	141.49	120.46	58.12	56.2	114.17	127.62	164.14	136.52	183.46	176.98	308.72	98.17
cds1117	15	10.5	7	0	28.42	11	21	2	22	23	15.47	1	17	13.5	4	4	12	12	16	10.5	17	11	30.21	7.5	16.07	9.63	24	7.5	8	3	12.6	8	33.79	4.68	14.03	9	23.77	21	32	13.2	14	12.49	21.16	52.83	35.14	23.94	15.5	49.14	20.69
cds1118	139.2	94.03	146.98	60.28	214	178.11	139.23	37.63	201.3	152.85	189.09	19.04	146.02	141.63	55.73	40.01	73.79	35.56	121.86	120.17	168.07	149.62	248.24	78.24	174.88	131.06	184.19	100.64	112.39	53.94	109.47	59.94	218.34	70.96	122.48	75.91	238.88	153.12	217.21	130.06	101.39	196.38	188.19	350.7	239.51	234	121.52	401	99.57
cds1119	678.11	462.42	638.63	290.83	1046.38	812.08	772.44	209.16	1009.93	850.2	935.5	96.18	739.38	598.1	296.04	249.21	391.79	239.9	573.72	508.93	828.93	645.16	1229.92	381.81	923.23	574.52	813.89	452.4	480.66	190.76	458.91	250.77	945.69	376.4	457.11	402.56	1204.28	628.44	1013.56	488.8	481.87	949.99	1003.89	1701.21	1170.02	1029.28	645.75	1818.74	560.76
cds112	52.83	38.62	76.77	11	127.02	42.02	74.96	8.62	76.52	82.38	100.05	7.44	62.32	89.63	55.4	39.14	32.27	30.91	65.04	61.47	122.05	44.04	136.59	50.74	67.26	57.16	97.34	51.28	64.69	31.96	70.38	27.89	124.89	51.39	61.73	67.99	145.5	81.04	144.54	83.12	83.87	155.18	140.79	231.45	171.55	154.58	69.74	240.2	111.09
cds1120	11.64	14.38	14.58	10.17	16.27	29.1	17.67	3.65	15.71	21.78	33.53	1.21	26.69	32.89	11.08	9.51	5.3	4.73	43.66	19.87	34.25	23.75	65.51	14.23	34.2	37.9	41.99	27.44	23.53	10.61	26.84	19.09	55.46	18.75	24.66	26.09	35.45	37.44	54.59	21.51	15.31	37.77	42.04	61.84	40.92	43.98	46.82	87.73	30.63
cds1121	45.72	38.43	35.81	16.7	49.12	45.28	41.95	10.89	74.92	51.86	65.04	7.48	50.53	38.89	18.95	9.39	20.52	16.33	43.19	33.43	49.46	42.54	92.31	34	61.12	54.36	66.55	32.25	29.08	10.98	35.32	21.03	63.85	24.77	45.3	33.33	93.73	50.04	71.74	31.42	34.1	57.75	59.09	103.97	87.76	86.01	52.88	173.39	48.93
cds1122	110.52	62.42	93.17	44.74	124.31	88.29	99.19	34.69	122.97	106.64	159.48	15.12	104.43	86.21	28.81	25.97	39.17	26.78	120.27	70.86	131.11	93.23	260.38	61.84	167.27	98.84	150.75	75.72	90.42	45.66	85.69	45.13	165.98	62.23	103.44	77.48	242.6	122.27	195.44	119.22	106.47	173.81	145.79	285.51	208.61	199.91	164.26	407.5	149.03
cds1123	47.8	39.69	63.29	23.72	129.41	59.65	92.84	24.41	129.37	69.92	106.58	11.24	85.45	97.18	41.11	33.66	51.13	32.7	67.43	38.39	58.27	38.28	93.64	34.59	65.72	58.51	75.52	36.62	41.98	19.6	32.79	20.44	82.3	26.72	45.51	38.13	79.58	39.86	87.22	50.14	47.4	95.05	84.37	139.78	87.63	79.93	40.67	151.99	68.28
cds1124	45.08	33.99	37.03	20.06	85.23	64.22	38.53	8.24	69.98	55.14	79.24	2.51	44.38	35.14	23.71	19.66	27.97	19.42	31.07	22.21	36.69	23.82	65.25	30.26	58.69	25.78	46.3	21.01	17.72	10.64	25.15	13.57	61.62	21.01	26.56	25.49	61.84	36.95	65.79	32.82	24.03	55.88	58.15	79.96	63.82	60.42	22.44	82.98	31.15
cds1125	379.45	265.85	343.74	172.65	512.89	340.88	446.73	124.8	541.2	472.17	491.96	60.86	415.7	355.61	204.03	162.92	265.41	150.45	321.02	262.34	393.39	374.94	576.24	255.17	482.73	282.68	344.83	227.24	211.56	104.29	206.17	141.44	470.61	164.39	207.58	258.71	560.53	374.12	528.33	262.7	287.13	449.94	425.14	772.01	556.54	487.79	334.13	882.41	351.12
cds1126	445.61	301.4	373.34	211.64	698.04	518.4	518.89	126.85	617.79	538.72	685.31	53.38	487.19	449.03	206.43	205.61	308.97	194.22	395.4	246.44	415.56	341.13	735.54	244.07	506.79	312.11	405.33	232.67	271.09	118.1	244.31	153.18	477.77	191.42	241.76	242.8	667.29	394.39	626.57	230.11	232.52	400.22	466.64	883.95	542.8	532.17	319.41	974.62	273.04
cds1127	227.67	173.79	226.29	87.45	456.61	295.53	249.41	64.1	331.63	280.93	354.54	40.46	311.41	303.68	123.62	110.45	168.18	105.93	238.34	175.81	281.52	216.69	413.58	157.97	379.6	177.38	212.5	171.87	162.33	82.43	143.59	106.85	252.4	103.63	151.2	155.39	375.98	249.96	471.1	208.29	167.07	267.64	407.09	545.17	410.56	322.64	202.57	563.87	241.52
cds1128	144.67	88.9	89.69	49.66	218.54	112.26	148.08	36.35	158.94	122.69	178.71	15.32	108	71.61	54.29	47.78	103.76	45.77	110.7	95.15	173.6	143.01	215.03	83.38	206.28	99.45	117.23	77.76	85.67	30.08	71.81	38.51	156.88	55.58	81.58	75.11	199.83	112.52	202.88	84.22	84.72	153.06	180.86	253.33	193.51	142.19	97.96	322.42	101.15
cds1129	10	6.88	9.78	6	28.32	24.75	12.3	5.43	21.99	21.28	77.89	2.5	114.28	98.51	131.09	138.98	36.27	16.07	147.08	80.55	278.78	121.29	420.8	79.34	201.11	133.16	225.04	124.87	178.89	80.32	214.77	144.17	502.37	184.18	193.1	143.56	331.43	196.63	266.08	167.01	169.9	334.1	239.8	466.24	251.01	318.97	214.22	824.6	361.17
cds113	29.01	33.13	44.12	17.4	84.09	65.65	42.87	6.32	65.34	64.59	75.08	9.54	43.71	30.32	28.95	30.01	24.69	9.97	42.83	34.1	69.37	35.01	93.3	21.28	58.48	50.88	56.34	27.35	35.25	12.03	30.77	14.84	68.22	17.03	31.32	34.12	71.95	31.64	86.18	42.4	26.05	84.12	73.98	144.87	81.76	92.55	46.4	150.45	54.94
cds1130	22.5	19.7	23.06	31.91	40.95	31.09	22.03	16.37	38.36	27.62	33.93	3	25.42	19.9	10.3	7.51	10.63	5.57	22.87	15.46	27.07	19.42	49.24	16.56	40.58	30.7	38.72	22.27	27.98	6.54	19.59	13.79	21.17	16.12	34.86	12.11	40.87	29.07	40.17	19.11	23.9	35.96	43.03	63.48	59.43	37.1	29.23	90.82	26.05
cds1131	51.39	34.75	31.38	15.83	71.06	38.04	49.47	7.89	70.13	78.86	119.86	6	133.15	130.1	51.18	57.5	31.35	15.64	119.2	76.79	160	95.38	228.43	69.52	145.83	110.69	148.47	92.81	99.97	53.99	113.77	84.08	198.81	106.76	105.03	66.21	196.16	113.98	148.21	87.65	81.65	153.88	180.82	196.12	163.38	189.69	123.36	292.1	152.15
cds1132	76.54	47.7	58.47	43.87	98.8	83.32	82.83	35.24	104.75	79.9	115.71	8.38	105.55	78.16	23.76	24.01	36.64	28.37	80.3	73.94	94.94	76.89	171.9	51.71	103.66	86.1	123.73	71.98	71.67	34.16	76.81	28.48	117.06	58.44	77.23	60.49	170.27	105.08	154.65	62.41	55.14	133.27	120.28	239.61	157.59	132.74	95.46	261.92	100.19
cds1133	58	37.03	28.93	22.95	63.82	36.5	72.94	20.98	73	69.75	80.49	6.93	73.54	49.78	21.63	25.08	30.94	17.73	65.31	47.94	73	54.53	117.07	40.5	80.82	55.54	74.04	60.24	47	27.97	44.32	25.86	92.6	32.17	58.38	44	137.13	73.96	125.94	64.83	52.2	90.57	119.07	184.14	154.76	119.41	69.12	213.23	77.66
cds1134	0.83	0.35	0.11	0.4	1.41	0	0.61	0	0.09	1.1	0.95	0.28	1.2	1.13	0.4	0.08	0.57	0.84	1.11	0.54	1.1	1.14	1.23	0.15	0.47	0.44	1.54	0.18	0.13	0	0.31	0.7	1.73	0.4	0.58	0.48	2.34	1.24	1.3	0.37	1.68	1.43	0.38	2.57	1.86	0.6	0.84	1.41	0.59
cds1135	20.18	25.38	35.04	5.61	39.78	6.28	24.14	14.63	37.2	36.3	45.35	3.85	22.08	22.23	8.27	12.15	16.07	9.65	25.09	27.27	26.99	28.25	45.4	14.66	42.36	28.71	35.06	27.04	26	9.85	27.8	13.05	40.28	23.98	21.06	15.02	63.9	35.87	47.2	38.08	21.07	58.99	59.7	74.11	61.31	49.39	29.69	84.81	46.01
cds1136	80.78	95.84	95.04	68.68	136.8	122.33	91.67	37.89	116.93	135.83	121.62	11.31	81.44	85.22	34.1	46.04	34.49	40.75	101.04	49.01	114.48	73.1	159.78	46.85	150.9	119.29	115.48	73.51	83.41	36.5	62.64	47.06	140.04	57.02	78.75	94.98	181.17	131.17	234.74	81.47	85.85	164.89	178.96	325.67	186.44	172.51	141.78	363.7	137.12
cds1137	44.83	55.4	48.52	27.97	70.23	58.74	62.2	13.24	83.07	85.75	95.61	8.71	58.24	58.33	26.74	24.17	23.33	24.71	82.86	41.32	61.34	53.58	119.2	33.36	80.75	60.99	81.54	41.77	53.84	13.61	53.95	27.27	93.81	37.18	51.82	51.56	120.86	64.84	133.9	64.04	57.03	89.17	114.63	206.49	149.74	119.15	86.35	234.96	78.53
cds1138	242.12	172.57	249.79	116.26	518.86	376.16	275.7	122.92	400.96	334.79	443.58	45.63	436.89	380.11	255.04	283.12	183.87	136.26	344.45	264.32	536.88	328.08	714.41	236	511.55	309.1	431.9	241.67	371.88	148.93	403.04	209.61	749.58	298.58	311.03	256.38	587.66	355.36	536.41	249.09	293.61	463.82	570.93	826.74	678.45	554.92	358.42	967.48	371.86
cds1139	12.02	9.66	6.96	1	14.57	9.13	9.56	2.22	8.65	6.87	6.67	0	3.95	6.8	2	2.13	2.68	1.03	4.73	4.98	6.14	7.73	17.34	3.14	10.05	4.7	6.54	6.86	7.02	1.8	2.22	2.01	8.62	5.14	3.5	3.85	6.24	5.67	11.12	2.58	7	8.81	9.76	19.94	11.86	10.78	7.16	27.55	7.4
cds114	39.56	35.22	51.4	18.06	66.29	45.51	50.91	8.57	42.5	57.44	83.64	6.23	33.53	29.36	16.48	10.93	11.87	16.61	49.08	37.68	53.74	40.96	77.12	37.84	72.07	42.98	53.7	33.45	37.9	16.76	31.68	22.33	70.22	20.37	30.27	24.68	90.85	47.49	82	44.34	32.38	64.17	89.38	122.52	84.38	83.32	60.33	146.51	54.7
cds1140	3.76	0.59	0	4.78	6.88	4.11	2.89	0.7	4.92	4.64	8.68	0.9	0.96	2.52	4.1	1.73	0.23	1.91	5.73	1.29	7.5	0.66	6.39	2.6	3.44	1.21	3.61	1.2	2.38	4.78	2.14	2.35	10.41	4.85	3.56	4.39	5.68	6.83	4.72	0.25	1.12	3.63	9.97	13.35	2.92	5.11	2.86	11.06	4.54
cds1141	4.64	1.98	3.22	0.13	12	6.66	6.85	0.19	8.25	4.96	7.18	0.03	1.75	4.69	0.1	0.94	2.51	1.64	2.25	3.68	3.19	3.03	10.26	2.85	3.15	3.03	5.34	3.08	6.83	2.03	10.1	0.23	3.34	2.73	4.96	2.65	9.08	3.36	4.58	4.04	6.17	3.99	11.85	12.54	9	15.09	3.26	8.46	6.97
cds1142	9	3	10.35	0	18.29	3.93	11.98	4	44.83	47.65	88.88	0	174.26	118.95	22.97	20.77	17.83	10.16	54.88	42.52	90.27	44.47	134.78	28.51	79.63	55.87	91.11	76.51	46.61	21.47	65.94	37.81	141.07	51.87	60.75	47.47	97.69	56.44	64.74	29.32	33.95	68.76	76.79	102.95	62.33	80.7	57.5	130.74	43.12
cds1143	114.22	60.67	125.5	66.42	189.72	139.83	152.45	41.95	191.38	157.45	182.52	23.71	158.34	137.19	56.46	52.44	58.67	35.43	123.27	100.74	143.05	133.64	260.49	82.63	182.34	125.29	148.08	87.91	108.89	46.92	89.66	57.96	203.1	67.95	106.8	99.5	255.16	170.07	260.55	160.42	119.81	225.99	215.89	365.76	276.41	193.73	141.81	347.85	145.28
cds1144	57.64	44.48	60.83	29.14	102.43	59.18	69.63	22.77	76.83	65.24	98.14	8.21	76.25	61.14	31.88	21.12	20.42	10.38	54.34	50.34	69.18	53.63	122.35	24.81	101.36	66.09	69.6	39.16	37.94	8.34	37.77	28.95	99.49	37.99	52.76	39.25	87.95	69.41	124.56	56.57	63.01	113.06	101.28	203.44	115.34	107.92	65.18	184.34	64.22
cds1145	139.02	120.3	106.75	60.72	248.57	187.15	157.65	35.09	174.66	210.77	175.14	17.92	162.07	137.32	68.85	57.22	68.17	45.76	137.73	113.61	173.97	156.13	254.93	94.78	213.16	174.7	172.87	115.77	125.12	54.76	127.58	58.26	222.07	82.17	112.3	107.33	258.22	173.26	281.16	143.41	126.59	239.69	278.51	431.79	306.22	236.63	164.37	437.03	177.59
cds1146	123.51	61.35	86.22	66.56	270.01	166.69	125.77	27.16	195.09	147.3	147.53	23.68	181.8	151.57	87	52.36	95.35	64.96	98.07	72.88	132.59	100.16	205.43	45.92	133.93	89.14	122.22	67.52	91.23	32.4	68.85	40.66	149.09	47.34	87.88	76.82	182.6	105.37	178.56	80.47	52.04	170.25	149.3	240.74	174.22	156.09	96.48	290.59	90.18
cds1147	190.74	130.97	173.69	61.69	373.65	265.24	262.44	49.28	260.82	291.83	305.85	26.44	182.86	185.32	80.9	80.21	117.63	76.28	155.37	139.04	186.17	178.55	303.83	86.65	225.58	174.3	199.72	124.71	146.66	62.48	112.6	77.51	245.23	82.61	123.76	108.04	304.4	189.53	257.29	139.25	107.14	240.84	248.35	388.51	299.88	276.09	144.25	456.06	149.27
cds1148	323.53	295.86	266.26	186.86	551.06	484.01	404.86	112.04	471.38	386.29	594.75	58.02	367.56	264.08	154.56	141.62	253.11	144.25	253.3	207.38	330.47	242.84	581.52	266.16	511.19	317.4	348.2	189.36	231.13	116.22	241.37	116.74	455.78	165.92	235.49	203.01	579.49	323.36	511.49	233.41	223.19	307.11	409.73	703.77	685.31	473.71	301.3	823.6	251.48
cds1149	950.18	715.2	822.14	469.13	1440.37	970.78	1129.22	316.38	1115.4	905.4	1255.94	102.02	960.38	586.97	353.76	289.03	720.84	344.24	649.57	548.12	759.06	798.28	1575.15	568.74	1260.92	671	858.57	450.72	594.45	282.12	472.72	303.28	1162.92	353.98	554.85	482.55	1350.47	650.47	1307.55	530.47	457.62	826.13	950.44	1601.3	1150.68	1106.76	564.99	2017.29	423.51
cds115	36.98	36.96	35.01	30.05	69.8	30.99	40.96	10.16	65.59	62.65	72.6	9	65.32	47.01	24.56	28.14	41.42	22.16	40.48	34.31	58.44	47.07	127.12	31.83	78.86	39.29	75.47	42.94	47.15	16	55.18	22.1	75.48	30.91	29.3	33.71	117.78	59.52	96.24	39.46	33.34	88	88.85	152.45	93.16	111.8	44.56	205.22	66.29
cds1150	18.65	18.84	14.84	19.04	46.59	36.56	23.91	8	33.42	17.04	40.89	7.81	90.59	63.72	27.09	22.47	20.23	6.76	52.67	45.78	89.01	43.46	134.88	36.57	70.11	67.54	87.79	48.42	43.6	22.04	74.61	39.73	151.2	48.29	56.03	52.69	111.53	73.53	102.13	43.84	45.74	90.3	94.31	133.52	100.34	96.21	61.46	224.13	75.53
cds1151	306.1	232.59	242.07	138.27	348.37	255.1	369.84	120.97	466.99	405.21	465.94	48.61	440.07	335.8	121.48	104.53	179.96	99.99	340.1	248.44	388.24	321.94	635.06	233.83	517.45	295.74	424.85	228.5	288.92	118.28	243.46	147.41	490.15	202.78	262.23	252.45	708.3	352.29	630.85	295.55	235.68	457.38	450.9	883	620.58	549.29	398.56	1010.88	316.16
cds1152	12.31	20.84	19.51	5.49	23.83	31.65	28.93	4	25.15	23.63	28.55	0.25	26.15	21.39	8	5.62	11.41	8	20.15	16.71	16.91	13.7	55.43	22.35	38.54	25.19	22.44	12.09	15.24	9.51	11.17	7.27	36.95	10.29	16.9	12.87	25.78	33.21	30.9	19.78	12.65	25.09	42.69	66.86	37.48	31.43	31.97	70.78	24.02
cds1153	31.3	33.85	35.11	9.37	35.18	34.45	38.94	3	40.42	27	46.06	1	35.57	32.03	4.52	12.55	13.64	9.65	31.91	18.61	62.57	31.72	65.74	27.48	51.05	29.19	27.77	34.93	30.65	10.92	24.71	17.23	55.44	13.62	11.41	13.42	74.2	35.03	59.05	41.6	28.14	69.79	57.49	90.47	57.94	59.93	39.14	110.49	47.59
cds1154	36.77	23.49	31.98	15.97	44.14	25.97	31.29	19.55	48.86	36.27	59.44	5.81	57.4	34.51	17.63	16.38	19.1	12.86	19.89	26.95	42.34	34.9	50.93	17.36	48.88	40.46	35.46	33.63	21.08	11.07	24.04	14.35	38.36	14.42	28.5	23.84	39.53	34.56	56.46	36.6	21.24	47.48	44.26	78.8	58.25	53.89	36.6	76.59	28.89
cds1155	0	3.96	3.15	0	3.06	1.43	3.63	3	2	1.76	2.79	0	2.27	5.95	0.24	0	1	1	4.66	2	9.15	1.32	10.03	1.31	7	2.83	3.75	4.63	0	1.13	6.47	3.13	5.65	3.94	7.53	5.36	7.81	10.39	9.11	3.76	4.85	9.38	7.47	15.79	13.02	10.33	2.75	14.41	4.01
cds1156	16.08	13.44	18.72	2.51	23.61	13.65	18.97	4	38.14	36.71	144.82	8.66	212.81	176.6	214.01	229.86	51.36	33.94	245.99	138.72	364.1	186.85	618.59	129.4	313.29	234.38	271.14	165.23	245.27	92.04	382.34	217.59	787.64	294.37	209.86	196.83	344.33	243.79	246.18	121.12	136.73	254.52	216.96	305.56	212.73	384.52	238.49	699.69	270.87
cds1157	56.59	33.03	46.38	16.3	108.33	95.31	73.52	18.41	49.98	62.32	54.8	6.41	46.03	38.41	14.61	21.28	31.4	14.38	36.09	38.15	52.83	53.3	66.34	38.57	80.21	38.27	38.29	23.62	25.39	7.3	21.2	20.23	59.77	18.06	29.76	38.57	74.6	39.52	69.58	35.8	34.42	54.74	71.02	120.1	61.39	81.72	35.64	93.79	42.03
cds1158	11.19	18.22	16.24	10.76	38.35	28.46	23.46	2.61	25.36	24.96	18.44	3.89	17.48	9.19	6.72	2.22	8.91	4	8.84	13.41	25.53	16.05	27.18	8.59	23.39	16.74	18.88	9.16	11.79	5.97	9.37	6.47	19.84	8.64	5.88	12.66	23.43	7.98	28.46	7.67	11.81	20.92	34.28	30.96	25.82	21.48	11.24	30.45	9.62
cds1159	97.57	75.84	88.35	40.16	157.87	109.19	103.35	56.67	161.84	138.18	162.9	22.01	119.32	108.25	41.5	28.59	29.81	29.98	98.44	77.76	108.4	94.74	191.09	59.9	156.24	103.96	97.94	75.39	79.78	26.89	81.42	42.57	134.37	49.22	89.04	80.84	219.19	134.85	188.01	118.37	113.7	219.21	262.34	351.94	335.02	179.21	123.2	346.15	155.51
cds116	10.53	11.5	12.77	2	21.25	8	20	7	15	15.93	12.33	1	16.1	11.61	4	6	4.5	4.55	7.5	13.37	13.73	8.47	26.91	16	18.19	6.97	17.04	8.94	8.81	8.35	4.6	2.32	16.93	8.5	11.89	7.74	17.36	12.17	14.8	8.64	8.5	7	19.46	18.49	23.43	25	11.03	24.5	15.35
cds1160	36.97	31.43	32.74	22.4	64.26	54.69	53.83	19.82	45.53	51.57	47.68	2	45.76	36.74	16.59	14.87	9.61	14.96	38.81	35.91	51.32	27.91	68.63	27.86	70.09	43.33	35.49	24.44	24.59	12.5	24.13	14.53	48.81	21.93	28.81	37.91	70	42.27	66.29	33.87	33.37	57.31	81.73	81.01	93	51.08	30.03	117.54	44.75
cds1161	407.49	327.22	366.6	208.67	725.59	519.68	432.51	137.12	646.48	495.45	698.64	55.59	492.18	456.29	194.56	166.83	302.44	161.92	404.39	233.14	465.52	375.53	788.75	209.51	629.34	350.3	521.75	240.44	320.31	116.52	338.18	166.97	628.03	202.78	312.13	269.63	814.66	424.24	737.67	335.5	305.62	603.02	553.01	1136.09	668.49	699.53	415.5	1308.9	377.37
cds1162	260.75	182.72	222.89	93.62	469.94	368.75	281.74	101.25	315.29	321.07	348.4	33.7	291.57	270.41	139.1	117.42	142.67	98.17	240.57	190.99	289.89	240.94	435.29	161.68	357.89	240.1	270.73	188.76	180.33	84.32	159.32	93.07	342.92	114.94	176.16	193.42	412.87	265.39	427.22	193.92	195.36	348.84	461.59	726.35	491.78	382.6	219.58	647.28	224.31
cds1163	21.58	10.38	35.67	10.24	49.11	29.88	24.73	0	30.49	32.86	34.93	2	23.52	25.09	10.54	7	13.16	8.6	22.88	19.99	29.5	24.72	37.18	21.8	33.79	24.32	26.84	21.42	22.83	6.98	18.24	9.54	43.02	15.79	17.89	14.44	40.91	31.64	40.96	24.93	25.87	33.82	39.84	60.05	41.93	41.01	30.51	70.65	22.98
cds1164	28	22.2	35.64	20.86	53.08	50.94	36.25	8.8	32.05	40.23	69.27	4.98	38.56	49.86	78.11	62.18	26.03	12.83	75.77	55.57	105.98	62.44	142.04	32.31	77.59	50.61	82.57	55.56	85.92	39.76	96.46	42.95	207.23	74.99	73.1	62.51	112.17	82.09	100.68	37.13	44.57	93.84	102.57	146.23	111.08	105.23	75.9	193.46	73.33
cds1165	195.45	129.24	184.21	78.04	341.35	219.2	209.14	57.5	285.41	230.15	284.62	32.73	221	232.52	97.47	68.08	126.1	61	165.9	102.79	192.35	164.71	333.01	119.45	220.58	152.59	190.4	129.63	149.69	62.59	150	87.22	258.65	106.09	133.75	105.66	324.82	179.11	292.52	137.97	137.75	220.67	252.49	428.01	290.85	295.45	175.57	502.49	169.92
cds1166	44.02	26.4	27.04	17.04	43.5	29.83	35.19	5.57	54.11	37.81	50.29	7.52	39.94	30.18	16.16	17.26	23.86	8.82	35.62	27.73	41.09	38.44	68.62	18.83	68.3	32.2	54.12	27.95	31.64	9.93	34.76	18.08	51.93	28.4	21.9	24.49	77.09	40.57	65.15	42.27	35.5	44.17	67.43	107.81	85.71	89.16	32.31	131.68	26.25
cds1167	490.64	433.36	520.5	264.43	728.65	589.23	578.59	193.95	805.23	713.56	962.78	90.23	750.1	719.7	227.56	228.08	237.48	203.87	643.44	357.24	819.06	465.72	1242.11	318.01	953.76	622.44	940.39	527.07	595.4	319.71	576.1	390.24	1044.31	456.28	583.84	565.84	1548.35	980.29	1283.6	691.66	648.94	1075.92	981.3	2072.5	1483.11	1442.22	960.52	2693.87	898.32
cds1168	361.33	269.07	288.47	151.05	633.91	441.59	328.59	112.87	425.27	422.2	410.69	54.61	413.98	275.3	158.3	107.08	198.82	124.31	284.98	271.31	393.17	307.2	576.47	210.48	471.85	289.3	293.29	203.91	233.07	94.34	206.34	110.6	431.62	140.4	231.28	186.22	497.38	302.75	513.35	237.96	219.24	402.64	480.28	744.07	536.88	441.73	292.7	739.01	256.95
cds1169	204.7	146.26	206.19	119.82	331.14	278.78	232.29	62.93	292.23	272.8	290.81	33.26	261.23	223.56	90.81	75.54	124.36	76.76	203.04	149.62	207.67	224.34	407.39	125.44	308.94	197.51	247.83	145.32	151.97	67.41	140.86	79.05	315.6	105.53	153.28	145.63	391.65	231.64	366.46	155.14	140.21	283.19	284.03	499.6	305.39	315.42	217.64	587.94	157.35
cds117	70.45	48.4	67.28	19.22	114.99	72.85	105.1	29.22	104.13	94.09	111.69	9	112.31	89.55	32.4	34.94	37.46	32.09	63.49	44.78	79.38	81.99	154.59	43.9	103.34	66.56	87.52	53.18	51.69	30.2	45.35	37.18	95.55	39.99	51.76	56.09	145.9	75.59	142.91	66.41	62.95	117.11	110.38	168.68	131.61	131.2	68.17	183.87	91.87
cds1170	94.27	72.87	95.72	50.84	128.18	99.85	128.52	43.36	135.87	99.14	142.44	10.8	145.46	66.28	48.28	39.02	44.49	33.89	84.42	79.04	108.3	97.87	226.22	72.72	174.24	108.44	125.71	72.57	87.82	29.47	75.1	42.53	160.52	62.62	80.32	73.21	189.46	108.75	174.72	87.3	85.01	109.48	108.8	232.83	195.1	163.78	113.52	284.55	100.35
cds1171	55.42	40.36	55.53	30.75	135.98	69.6	68.44	23.61	36.91	63.66	46.15	8.31	44.2	52.56	26.24	25.8	48.05	34.56	54.73	41.48	54.18	60.69	100.59	43.79	89.94	65.8	59.73	43.49	47.21	8.77	31.13	20.2	64.56	32.56	67.05	31.63	74.4	38.52	101.42	42.15	47.94	78.04	77.75	126.62	98.82	69.08	42.07	119.26	54.34
cds1172	44.1	36.4	55.52	24.99	146.44	70.89	52.89	7	88.61	80.79	79.35	10.85	59.95	84.78	43.77	37.54	36.73	37.81	48.01	49.68	68.08	30.26	87.8	40.68	75.99	56.09	54.08	56.55	65.06	25.98	39.21	34.13	110.2	33.24	47.27	46.22	99.93	53.63	91.03	30.23	37.64	90.41	120.65	147.32	107.83	82.29	49.14	142.7	53.57
cds1173	86.16	71.1	69.06	34.13	101.34	96.26	88.94	30.81	146.81	108.26	140.12	16.83	92.02	104.93	52.5	45.98	44.79	24.91	85.51	69.44	93.21	76.31	192.15	38.51	120.53	74.56	107.39	77.14	101.26	40.17	86.42	52.12	128.48	47.39	85.59	87.54	203.56	97.28	182.85	90.75	83.41	179.22	133.25	296.96	172.6	189.77	93.13	337.53	124.86
cds1174	73.5	48.88	88.7	37.1	177.68	95.22	94.69	29.03	114.04	122.88	112.26	8.48	105.06	80.64	34.89	37.92	66.43	32.38	59.99	76.8	107.55	73.65	142.69	54.68	143.52	85.26	86.58	64.64	63.19	23.47	56.94	25.15	93.46	51.05	52.01	73.33	130.14	79.92	162.56	75.8	57.71	107.03	130.77	211.8	170.87	141.66	89.13	238.96	71.63
cds1175	19.54	15.41	20.76	12.81	51.45	31.46	30.99	10.16	36.38	36.78	40.07	6.36	18.72	20.3	8.96	10.13	17.31	8.3	13.92	14.4	29.88	19.55	41.15	13.63	44.09	20.91	23.16	22.1	13.33	8.15	7.61	6.67	32.63	12.9	15.8	11.59	34.75	17.21	39.3	18.47	17.57	28.18	26.84	56.66	48.81	32.9	28.73	62.89	23
cds1176	6.96	9.08	5.26	3.41	22.49	18.46	14.39	0.65	12.71	9.43	8.63	2.14	7.99	9.41	3.55	3.08	4.63	1.8	8.29	9.75	12.13	13.86	23.1	7.85	16.32	5.28	11.96	8.14	6.36	4.75	8.88	4.05	11.77	2.78	9.13	8.59	17.56	14.68	20.33	13.78	2.77	13.66	21.54	32.43	19.11	12.69	12.69	25.79	15.23
cds1177	1	0.89	3.1	1	2	7	4	2	3	5.82	4.72	0	5	6.78	1	0.83	1.63	0	4.5	3	9.7	5	11.26	6	10	4.21	8.08	1	0	1.5	6.08	1	6.89	2.97	5.7	5.5	18.27	5.63	25.95	28.99	32.24	39.66	32.89	70.04	53.6	26.17	15.39	106.05	64.97
cds1178	85.23	55.62	77.52	26.65	102.09	92.77	93.89	38.22	161.16	122.78	170.56	22.3	111.16	93.26	39.75	20.48	38.44	32.15	69.32	49.5	82.24	64.6	147.43	57.36	120.48	74.67	130.63	54.82	83.51	34.4	79.93	42.69	158.48	50.43	66.71	65.3	195.03	89.82	138.77	73.55	70.12	118.26	121.17	234.35	173.81	168.78	83.92	294	106.06
cds1179	77.27	66.77	79.23	51.69	100.56	100.97	78.21	14.4	107.22	95.98	115.54	11.53	92.7	78.62	30.34	25.9	33.78	26.37	91.45	61.91	100.81	63.58	179.32	54.8	112.31	100.68	98.09	79.6	69.47	23.98	57.39	41.74	131.05	47.29	68.32	83.45	168.4	118.77	178.21	69.73	56.32	131.11	140.27	279.76	175.98	153.62	116.98	307.47	99.18
cds118	43.19	38.52	25.68	17.12	100.32	65.97	63.1	15.37	64.29	48.8	78.12	3.9	59.41	22.32	10.09	16.25	30.23	12.95	34.01	41.06	36.18	35.89	70.24	24.98	54.78	26.53	42.26	17.1	22.99	13.77	23.55	3.61	58.74	17.73	22.72	26.04	81.84	29.54	56.07	25.66	22.63	47.73	57.9	87.19	39.75	55.42	24.62	76.58	29.84
cds1180	7.46	4.05	10.64	3	24.75	6.05	9.58	6	9.48	9.09	16.48	2	6	4	3.25	3.32	5	0.5	12.58	4.53	8	11.23	13.9	7.5	10.5	6.94	9	6	3.5	1	11.9	2	13.19	6.43	3	8	19.82	10.24	12.43	9.48	11.93	13.6	14.4	34.84	23.57	8.51	11.44	27.94	14.46
cds1181	39.4	29.68	36.48	9.66	44.68	31.26	54.75	12	58.67	55.57	79.93	5.77	48.73	34.54	19.26	10.95	14.99	17.2	44.55	39.43	37.16	43.08	91.99	33.57	62.72	38.81	43.04	30.81	34.42	15.73	24.14	10.77	63.32	13.01	29.34	30.55	93.44	59.64	55.27	27.87	36.02	51.09	83.24	112.48	98.26	62.83	46.05	114.22	68.36
cds1182	1.18	0.31	0	1.97	1.07	1.37	0.9	0	0.32	0.88	0.35	0	1.34	0.69	0	0	0	0.19	10.34	0.97	1.23	1.06	2.62	1.08	2.16	0.66	0.43	0	0.09	0	0.15	0	0.6	0	0.61	2.02	0.29	0.89	11.21	0.65	0.36	0.2	2.22	9.88	1.46	0.59	1.06	2.1	0.74
cds1183	11.18	9.02	15.34	3.8	41.95	5.86	21.27	0	10.41	17.04	18.92	0.95	12.07	11.58	5.2	6.83	7.22	2.5	14.29	12.43	13.45	6.74	14.08	11.88	15.9	5.2	12.69	6.04	13.83	1	15.21	2.3	22.75	4.78	11.19	7.94	16.41	9.76	14.99	10.96	15.61	29.39	21.04	18.38	23.12	22.71	7.5	41.07	16.15
cds1184	631.04	332.75	829.37	344.7	1112.76	910.82	1062.19	379.9	1162.63	895.22	934.4	85.28	566.49	430.46	271.84	203.96	308.75	179.93	346.96	318.8	437.7	284.32	803.2	207.76	480.45	325.47	527.71	223	397.71	155.04	308.65	163.97	483.84	179.91	266.58	207.21	670.81	263.21	561.55	164.89	154.29	284.94	496.69	715.4	431.5	470.03	263.87	800.69	175.69
cds1185	917.96	626.44	920.48	498.02	1957.67	1496.19	1235.05	396.68	1436.19	1216.72	1272.12	132	902.38	720.45	597.17	504.27	627.34	380.5	981.79	748.12	1260.38	952.16	1803.44	564.37	1276.22	840.01	952.19	592.57	795.14	312.08	673.6	407.51	1496.03	518.62	756.26	628.47	1510.84	859.35	1527.89	653.23	618.14	1208.69	1321.2	2228.14	1551.25	1477.03	812.36	2455.79	864.7
cds1186	102.56	92.43	108.94	65.77	194.56	147.37	157.65	33.36	145.51	127.02	137.54	9.76	88.17	59.74	59.69	28.46	56.47	33.8	62.86	54.6	90.87	79.73	154.56	76.33	123.87	94.82	92.21	50.32	47.56	21.38	69.42	24.79	114.11	39.48	52.28	47.55	146.59	73.14	121.77	59.06	61.27	108.48	109.88	166.12	144.99	121.5	67.8	210.99	58.32
cds1187	80.87	51.4	62.95	49.67	119.75	71.3	109.66	37.65	135.84	105.56	112.95	8.87	89.14	64.92	38.71	32.19	54.22	27.64	71.06	58.86	85.73	92.14	148.5	56.97	100.14	74.21	86.2	37.89	54.79	26.64	57.46	24.48	97.48	38.2	44.32	41.4	131.42	62.17	134.62	64.74	66.48	84.67	107.56	190.19	110.06	107.61	61.29	185.28	53.12
cds1188	109.61	73.72	112.14	53.69	178.61	91.73	125.82	49.98	150.32	133.91	183.5	16.55	115.1	101.84	35.87	38.78	48.42	38.22	81.55	74.2	107.44	88.3	178.75	76.74	143.12	118.19	116.03	68.83	90.58	43.9	66.63	27.73	123.25	57.44	92.83	79.59	182.22	101.25	173.88	118.99	103.71	154.73	164.48	278.92	243.09	158.43	118.22	265.5	114.51
cds1189	47.45	43.51	50.13	14.13	95.66	79.38	62.18	19.05	56.41	67.89	58.99	3.14	47.87	35.06	20.28	27.84	25.08	19.1	30.64	30.64	51.22	35.82	68.22	22.11	50.7	40.39	56.21	20.76	26.32	11.33	26.67	20.35	35.29	18.46	20.78	23.79	55.27	31.93	65.21	26.78	22.14	52.09	66.32	94.28	63.91	49.97	37.94	84.25	31.8
cds119	3.99	2.13	7.07	2.31	10.74	11.27	4.08	0.56	1.84	3.76	2.8	0.73	1.63	6.52	0.96	1.73	3.65	1.32	3.42	6.01	5.22	9.01	5.06	2.58	4.84	4.78	2.03	3.5	0.85	0.32	1.75	2.15	2.42	2.02	2.03	2.51	4.81	4.79	5.48	3.78	4.46	9.35	5.52	12.81	8.85	6.96	5.77	9.47	4.3
cds1190	140.59	108.36	134.42	63.58	252.75	124.58	214.39	71.51	273.6	164.16	250.67	19.48	200.16	180.02	95.19	71.84	125.49	91.13	145.59	100.4	170.43	121.32	296.92	100.52	196.25	135.06	193.93	103.1	112.03	49.47	121.97	62.58	207.55	65.64	100.82	99.21	271.05	147.71	259.38	106.35	123.19	171.66	229.41	309.48	230.78	205.84	133.94	363.66	112.27
cds1191	49.02	34.28	49.77	11.33	111.35	46.89	50.65	5.28	67.02	59.36	74.66	12.64	60.57	56.29	25.89	17.71	26.68	25.86	41.97	40.6	66.32	46.3	78.09	25.36	53.93	49.47	72.69	47.82	28.96	15.23	24.89	22.5	68.54	30.28	39.43	29.78	62.86	43.31	85.5	38.57	37.6	75.98	121.43	117.22	89.85	72.25	50.71	137.56	38.33
cds1192	102.59	101.43	106.79	52.91	169.59	147.51	103.59	33.03	158.12	149.74	188.62	25.32	122.95	125.71	49.86	40.38	56.82	57.64	95.72	88.04	152.15	105.81	232.03	68.77	146.14	113.88	118.79	68.55	110.3	58.87	103.15	49.16	186.45	64.4	77.78	98.82	239.77	148.52	219.18	137.03	142.43	197.43	221.23	431.62	316.51	266.26	133.94	424.54	156.36
cds1193	86.99	53.93	83.94	25.52	160.88	125.47	101.03	18.14	112.29	109.07	136.89	30.39	107.91	72.2	39.56	29.69	69.37	30.03	61.8	66.95	88.95	90.45	137.51	43.29	86.46	67.86	91.98	48.68	65.95	24.17	45.53	24.25	121.98	33.57	58.1	46.4	146.23	74.79	134.07	43.67	46.26	76.66	131.88	189.8	130.81	117.81	75.81	222.47	67
cds1194	16.66	6.15	9.95	3.98	11.88	10.47	5.78	1.33	7.59	8.59	8.29	0.18	5.84	4.73	3.72	4.34	3.89	3.39	4.82	6.44	9.3	5.17	8.31	5.51	14.78	8.3	6.79	6.22	7.39	0	2.93	2.88	6.02	3.2	5.02	8.69	8.42	6.91	7.34	7.52	8.05	5.87	13.23	12.05	8.32	17.92	5.43	19.29	3.95
cds1195	0.55	0	1	0.94	2.46	1.8	5.48	2.33	8.44	12.33	41.86	0.5	57.8	62.58	34.86	51.75	8.23	3.33	70.49	38.92	79.64	38.45	128.56	32.13	69.21	52.48	77.94	68.13	70.1	31.88	70.85	63.43	154.93	85.75	54.75	54.55	103.84	66.25	93.89	72.4	55.47	137.15	55.33	130.12	98.79	103	83.83	151.39	128.1
cds1196	5.7	3.89	10.75	1.79	5.21	11.59	14.8	0	27.22	33.12	75.11	6.09	108.93	97.88	32.36	31.1	16.76	9.06	90.82	35.42	104.5	58.65	185.33	36.87	113.9	77.24	177.97	97.37	110.15	45.36	104.83	72.09	246.55	87.15	107.89	91.45	172.9	109.97	136.57	103.36	78.02	192.23	90.35	224.38	92.7	187.27	144.85	400.63	157.51
cds1197	3.88	2.71	4.66	0	5.37	8.54	13.05	1	28.81	17.76	97.29	8.3	126.77	82.5	39.74	45.58	16.23	9.83	80.5	40.87	94.54	71.44	174.71	39.67	142.02	64.77	161.55	89.38	128.67	55.32	140.79	75.16	281.16	96.86	111.33	96.96	213.2	136.79	126.82	128.52	97.29	188.04	94.97	206.88	125.43	235.08	144.3	416.84	208.4
cds1198	13.33	14.07	11.51	0.87	13.45	7.86	9.35	1.5	22.45	16.69	14.05	2	9.75	8.01	7.68	1.33	4.02	0	14.12	8.69	20.43	19.8	36.03	11.37	28.23	14.28	13.09	9.1	14.98	6.7	12.3	9.95	24.94	8.46	11.88	18.56	35.96	20.27	28.02	6.42	11.98	23.4	30.95	45.28	26.45	40.53	21.37	82.38	19.88
cds1199	32.48	21.73	32.6	11.86	47.84	27.22	44.09	4	53.62	30.78	51.9	4.35	59.21	35.84	22.89	16.62	16.34	16	44.71	28.92	61.05	38.46	71.84	16.84	57.05	43	49.53	30.72	41.74	17.47	26.12	22.19	51.69	20.86	36.9	34.85	100.25	46.26	83.91	31.68	27.02	53.93	73.72	101.28	69.03	61.28	38.57	143.69	29.16
cds12	927.56	641.34	865.21	497.43	1170.17	861.05	1046.88	283.18	1343.93	1062.22	1477.52	123.78	1230.3	981.02	453.13	391.5	664.1	403.09	887.08	620.3	1014.38	740.9	1663.29	578.28	1263.8	860.44	1084.51	669.96	693.28	345.43	661.62	341.1	1180.09	464.06	644.02	616.3	1559.98	882.72	1443.3	599.37	532.22	894.1	1246.7	1939.82	1234.3	1312.48	820.04	2291.54	631.92
cds120	113.89	90.65	110.58	65.56	173.87	149.94	142.29	38.8	140.6	169.24	162.15	31.13	130.5	156.95	62.35	66.64	70.7	50.73	104.26	57.85	131.86	35.31	212.06	93.9	169.14	129.2	130.62	104.71	82.29	47.71	73.5	43.1	130.7	71.87	83.25	82.97	162.9	123.7	193.14	65.5	57.53	57.89	166	262.84	241.73	164.63	110.18	286.7	101.34
cds1200	0.75	0.77	0.73	0	0	0	0	0	1.42	0.92	0	0	2	0	0	0	3.4	0	0.93	0.31	0.8	0	2.36	1.5	0.85	0	2.31	1	1.25	0	0.31	0	2.37	0.84	0.78	0.14	3.8	0	0.49	1.82	0	4.39	0	0.5	5.28	1	1.31	3.34	0
cds1201	216.15	147.58	204.52	84.18	349.86	243.02	254.84	95.66	334.14	283	303.12	26	273.42	205.73	127.66	98	131.06	80.29	212.77	170.57	233.47	218.82	385.7	115.65	257.22	204.88	235.46	119.51	166.29	61.82	129.75	84.48	258.88	98.05	160.38	141.3	377.85	233.06	368.69	180.52	186.83	317.93	299	501.7	354.13	344.2	194.77	519.42	222.96
cds1202	0.63	0	2.7	1.47	3.07	0.71	5.75	0	4.28	9.41	9.64	0	8.07	5.03	1.47	1.51	0.44	0	4.72	7.06	8.11	7.95	6.55	2.55	8.61	4.57	9.6	3.49	1.7	1.67	4.32	1.39	8.96	2.07	11.51	3.95	11.35	13.24	11.82	6.86	11.25	9.96	7.8	19.82	15.18	12.75	5.76	24.13	6.82
cds1203	6.82	1.27	13.01	4.19	17.8	13.42	16.92	4	8.25	11.02	8.34	1	6.77	11.3	4.84	3.29	0	4.28	12.06	5.93	9.17	4.72	13.93	6.36	11.35	6.71	5.22	6.78	4.39	0.2	9.94	1.15	9.15	1.82	9.85	6.95	16.55	7.68	9.8	9.2	7.81	15.66	12.28	28.57	20.09	18.02	12.51	44.62	14.16
cds1204	41.77	40.48	35.26	20.07	74.06	70.96	50.13	12.41	58.22	43.78	44.52	4.11	48.92	29.79	11.7	10.91	12.02	16.48	30.58	22.59	32.8	45.07	74.29	27.32	82.08	34.7	31.74	12.45	23.41	12.65	25.18	15.37	52.76	18.31	21.18	19.17	53.59	32.36	69.49	25.77	26.7	45.36	53.53	82.23	59.66	37.7	28.57	109.33	23.47
cds1205	223.36	152.93	237.28	116.7	412.19	219.15	247.15	85.37	295.32	248.13	319.89	24.24	307.7	238.42	95.39	76.14	96.3	75.69	213.99	174.56	262.48	181.31	419.98	156.86	374.71	229.54	274.44	172.22	201.75	84.82	197.68	95.59	354.87	128.56	170.15	161.25	433.28	219.6	343.31	189.32	198.63	310.57	375.81	611.32	436.96	346.74	240.14	683.63	204
cds1206	46.91	25.69	43.59	27.05	84.44	46.57	53.3	11.32	61.16	51.45	48.13	3.21	34.77	53.6	21.4	19.53	12.33	13.7	37.33	33.89	43.97	40.03	69.72	38.16	62.91	35.86	38.5	34.93	35.77	13.4	28.83	14.87	64.32	12.92	20.11	28.76	75.82	37.62	66.57	39.13	36.08	59.79	67.11	99.83	110.01	79.45	43.44	101.24	39.89
cds1207	31.69	31.72	40.46	27.68	60.33	40.07	55.46	15.08	43.75	33.35	32.77	4.18	30.66	35.2	18.87	15.72	17.9	13.01	31.01	32.99	31.11	46.87	71.51	24.47	52.76	32.7	31.32	20.48	32.58	13.81	17.29	18.54	50.87	16.27	19.4	21.38	47.05	30.43	55.47	52.38	20.22	49.86	58.9	90.61	64.83	48.88	39.64	85.61	32.12
cds1208	36.21	40.59	42.97	18.75	80.73	63.74	53.28	20.93	65.65	58.42	75.77	9.47	46.85	38.13	20.47	14.41	38.07	20.37	49.76	48.09	55.55	64.2	105.78	37.27	91.05	47.04	57.13	29.26	49.62	17.23	29.63	18.38	76.51	27.37	33.21	46.32	85.48	52.83	106.14	35.79	33.22	67.34	67.78	110.74	83.2	68.85	52.72	144.75	36.7
cds1209	39.94	30.73	28.96	27.51	78.63	49.11	45.5	8.77	53.77	43.32	45.29	7.79	40.51	24.36	14.21	12.53	24.74	10.9	34.23	30.61	43.16	43.43	65.1	18.82	48.96	38.61	33.8	26.11	30.8	12.25	21.51	11.14	46.3	27.53	26.61	25.16	51.92	37.39	59	23.96	25.15	63.6	53.05	80.86	66.45	47.22	31.93	77.93	27.28
cds121	110.21	103.61	97.9	66.44	134.98	130.53	131.63	56.2	157.1	154.34	164.25	30.19	120.2	115.12	59.58	56.62	60.63	52.76	121.71	51.27	128.68	92.79	221.83	60.58	161.56	124.95	149.81	87.08	79.17	41.22	76.77	55.26	153.12	67.21	85.78	95.03	201.35	145	226.94	76.37	73.11	118.07	127.86	305.49	166.91	180.54	130.36	360.92	104.97
cds1210	46.28	41.43	29.3	17.4	94.22	53.99	41.12	11.01	56.71	76.05	73.58	4.34	50.7	56.34	29.21	16.49	22.57	24.88	33.93	28.65	52.63	38.3	84.96	22.99	69.68	49.26	40.63	33.03	26.91	12.12	27.64	9.95	58.86	19.52	31.6	25.85	64.41	52.81	71.55	33.55	28.37	47.73	68.78	100.72	58.77	60.36	52.99	111.51	36.71
cds1211	219.47	150.61	233.86	106.21	404.93	271.83	274.88	60.8	344.17	281.83	383.69	41.38	306.08	317.95	108.27	113.5	110.27	108.22	212.29	205.67	256.87	220.87	367.49	164.8	327.62	203.63	272.65	195.89	189.79	105.18	181.36	101.08	315.68	141.82	167.52	179.82	388.99	269.07	412.83	223.45	232.69	378.43	385.42	605.17	517.16	353.16	230.88	645.63	251.45
cds1212	46.2	31.75	42.03	11.02	54.47	49.47	44.11	19.47	64.74	54.7	66.85	2.79	43.52	29.32	11.35	12.99	15.5	12.22	28.15	33.6	40.98	35.35	59.49	23.9	51.53	38.84	43.21	29.08	39.36	14.73	29.64	18.33	40.28	19.58	26.49	26.33	54.11	43.7	68.72	33.98	33.31	64.07	98.07	111.11	87.83	43.18	40.27	90.13	33.57
cds1213	69.05	27.06	59.77	15.46	82.54	36.09	69.61	17.07	69.1	84.71	73.39	11.22	51.71	56.49	17.21	18.93	27.13	16.4	53.82	37.76	69.89	52.54	108.76	46.83	84.49	61.97	67.66	39	32.03	18.57	47.28	24.25	76.6	38.25	37.12	36.76	100.51	69.56	100.07	50.09	47.74	74.01	67.11	128.21	104.02	87.31	65.45	175.46	62.42
cds1214	113.49	94.5	134.19	46.19	256.39	156.91	157.07	40.68	216.35	180.61	221	7.77	183.04	155.01	71.72	53.06	97.09	60.88	136.26	118.38	169.31	125.6	261.14	87.34	193.04	140.4	163.36	114.78	116.82	52.52	103.1	50.07	186.34	67.25	96.64	104.3	238.4	124.74	240.87	115.49	114.92	202.93	234.6	326.57	294.81	238.89	118.22	390.1	137.76
cds1215	279.78	190.65	269.2	103.79	373.28	291.58	320.73	72.9	411.52	389.31	481.04	50.61	350.86	278.88	142.91	118.69	188.95	82.43	224.81	155.86	291.44	238.42	489.16	146.43	333.75	202.79	293.6	174.67	224.11	90.77	167.25	120.24	372.26	155.83	218.21	162.27	490.9	251.8	454.39	211.94	209.28	361.56	348.68	591.33	398.89	422.94	247.03	767.95	264.49
cds1216	0	2	1	2	0	2.5	2.63	7	2	0	3	0	0	0.46	0	0	0	0	1	1.98	2.47	4.95	0.5	1	1.5	2.41	1.98	1	1.98	1	0	0	1.82	0	2.9	2	2	0.5	1.99	2	2	2	0.5	4.62	3	7	3.51	4.5	0
cds1217	17.73	16.46	17.28	10.88	35.75	14.54	17.57	5.35	36.66	22.42	43.83	4.95	32.19	26.17	8.88	8.06	16.19	16.99	32.2	17.59	30.96	29.86	55.38	27.45	54.34	32.73	46.69	35.41	37.87	10.37	19.39	20.69	67.41	22.24	34.19	29.51	67.01	50.91	61.45	35.54	39.74	68.38	62.84	112.54	88.07	70.58	40.03	145.01	47.75
cds1218	50.79	38.24	38.29	24.73	68.81	59.87	64.69	25.46	87.54	80.63	70.14	9.87	75.33	68.27	20.45	21.91	25.64	8.81	66.19	61.91	115.04	69.3	152.36	41.87	122.63	84.78	105.23	84.85	69.64	31.55	52.46	51.5	117.59	50.54	61.32	63.41	172.04	99.48	168.23	82.39	81.46	150.49	187.8	239.62	188.11	177.91	118.35	297.08	117.05
cds1219	39.4	27.18	46.22	18.2	62.83	48.7	39.49	12.94	53.48	32.44	59.84	2.48	55.05	46.03	26.29	16.48	29.19	21.15	45.26	47.18	47.08	33.26	82.17	17.5	40.01	36.44	45.98	28.13	47.49	16.94	35.24	22.83	74.7	17.92	30	32.36	75.04	53.72	75.05	34.12	23.48	52.9	68.91	118.13	88.59	64.93	43.79	113.21	38.24
cds122	128.84	89.55	133.81	67.76	201.97	110.75	166.97	35.1	180.62	145.91	200.18	12.46	134.61	103.83	63.51	48.75	74.57	48.76	109.21	105.36	146.81	131.49	223.31	90.42	176.86	94.89	132.45	71.97	90.18	41.18	90.36	28.6	167.3	58.35	97.79	87.7	226.9	167.5	213.17	100.1	135.72	183.7	186.59	336.44	222.38	187.37	117.18	400.38	131.85
cds1220	18.57	12.93	18.69	14.81	23.06	23.22	30	11.38	33.02	25.33	40.74	2	32.39	17.06	12.87	9.12	12.27	6	23.01	16.11	25.23	25.19	39.53	13.45	26.2	23.51	29.31	6.74	19.89	8.5	15.3	8.72	35.57	16.5	12.35	17.8	39.75	30.71	39.08	15.42	18.47	21.62	33.6	38.63	32.41	37.87	26.21	61.25	19.98
cds1221	16.64	9.41	17.21	6.72	36.01	9.21	20.02	0.69	11.46	12.88	11.32	2.33	10.5	13.94	9.27	2.34	8.72	4.44	18.26	12.09	19.23	25.51	19.11	10.31	19.36	10.11	12.46	9.79	12.79	3.11	9.74	9.25	19.94	5.09	8.45	11.21	16.66	13.21	24.93	15.5	11.77	25.36	25.91	32.3	33.66	16.13	15.53	30.03	17.06
cds1222	46.21	38.4	38.85	31.14	86.21	73.91	73.36	20.62	50.97	52.63	53	2.81	44.69	23.14	16.46	14.1	27.23	11.92	38.04	30.81	44.82	41.08	81.12	34.92	46.36	31.7	47.73	24.36	31.94	8.96	30.49	19.58	52.4	19.28	31.76	22.86	58.82	35.9	60.71	42.27	32.1	55.22	58.88	92.36	63.88	54.92	52.89	88.31	23.32
cds1223	57.87	54.61	53.43	29.93	122.66	83.67	70.09	13.87	89.1	81.16	93.23	8.5	63.4	48	29.99	33.14	33.78	19.59	52.55	41.17	87.91	68.55	96.47	33.93	80.07	52.76	73.69	44.25	33.27	20.51	29.75	20.26	69.91	37.29	46.98	45.33	86.34	54	102.53	48.69	46.03	77.56	93.06	149.1	95.2	87.77	72.77	140.47	55.49
cds1224	310.25	273.06	336.06	158.42	682.25	491.97	442.78	123.37	493.35	499.61	577.02	44.88	449.01	337.49	176.78	166.58	208.58	127.06	322.54	260.16	399.53	341.84	502.28	218.07	432.92	317.95	379.41	221.44	252.45	117.93	219.17	127.33	468.72	176.75	219.9	230.45	609.62	346.67	553.79	250.23	254.09	415.38	593.96	822.15	691.48	467.2	347.1	956.29	349.32
cds1225	498.17	356.57	438.66	214.91	825.24	588.1	529.05	158.77	766.92	582.33	754.27	93.47	600.45	469.78	270.13	211.37	301.78	202.07	428.29	383.08	495.22	435.49	816.86	300.28	611.79	433.5	530.7	361.81	405.89	145.93	314.36	196.68	635.44	242.1	346.82	324.7	777.91	470.29	767.09	362.64	295.6	643.63	838.44	1184.68	977.31	666.55	480.05	1270.84	437.45
cds1226	84.36	55.79	80.35	19	143.62	100.34	108.23	29.95	110.12	111.61	156.82	10	99.17	72.73	37.38	37.44	31.63	22.65	84.38	62.02	121.92	80.75	165.79	46.4	142.26	85.19	122.95	62.88	65.29	28.5	45.97	29.27	142.45	43.89	68.94	75.93	158.93	108.74	189.46	93.87	90.46	170.61	132.09	250.66	190.25	166.76	93.47	360.63	147.18
cds1227	25.93	11	26.84	12	34.77	27.55	20.36	8.56	39.56	26.56	48.26	4	63.11	75.29	91.95	71.94	25.12	14.81	93.01	40.71	106.51	65.25	207.16	43.16	100.53	73.2	126.65	70.95	153.2	55.64	128.84	75.87	287.56	126.35	95.08	82.15	145.27	78.13	117.6	50.16	41.61	103.96	83.08	139.55	122.08	155.54	95.41	293.81	79.61
cds1228	9.43	3.49	10.9	4.71	12.13	10.36	10.95	1.34	9.19	7.76	9.63	0	9.45	1.89	0.34	5.11	0	2.17	8.92	11.86	14.53	14.85	31.6	6.85	15.52	10.97	11.96	5.5	14.96	8.53	9.31	4.88	21.01	8.96	6.5	6.26	25.53	10.68	21.69	5.39	8.86	14.63	21.36	31.32	20.89	12.76	15.82	32.35	11.01
cds123	0.58	2.74	5.39	0.98	6	2.76	2.73	0.04	4.3	3.04	5.5	0	2.3	2.55	1.34	1.36	0.8	0.17	1.99	3.14	5.39	3.72	6.88	4.44	4.74	3.5	1.41	2.43	3.04	2.19	1.52	1.92	3.52	1.17	3.14	2.51	8.84	6.87	4.34	2.58	2.64	1.1	7.9	10.67	11.49	5.86	7.57	9.77	10.93
cds124	0.7	2.17	3.47	0	5.36	0.6	3.11	0	3.29	3.49	4.39	0	2.51	2.6	2.16	0.33	0	1.65	7.76	3.89	7.4	0.56	7.3	2.4	7.57	1.77	5.76	1.34	2.19	1.55	3.49	0.59	6.87	2.08	5.8	1.13	3.67	6.96	6.4	0.73	1.82	4.5	9.5	14.58	6.47	4.45	6.35	9.11	5.09
cds125	5.67	6.1	12.45	0.41	12.25	2.06	4.76	0.48	7.57	11.99	9.09	1	5.09	2.52	1.61	2.34	3	0	6.05	8.67	19.09	13.28	15.01	6.67	16.14	5.9	10.56	9.74	7.63	2.11	9.8	0.35	12.3	0.72	6.49	5.75	11.25	12.4	16.81	7.1	3.98	12.28	11.05	20.81	21.68	17.78	6.36	27.44	5.95
cds126	4.1	2.04	2.69	2.66	6.15	0.99	2.21	1.22	3.45	1.75	3.18	0	2.41	0.85	0.51	1.17	1	2.34	2.85	2.05	3.52	2.73	8.76	4.7	4.49	4.06	5.61	1.76	4.23	0.09	3.98	7.33	6.3	2.01	6.3	0	6.65	6.08	7.43	3.7	3.45	5.47	1.6	8.44	10.27	10.25	6.58	17.67	2.83
cds127	183.74	101.28	137.57	31.44	247.45	147.19	171.36	65.76	269.86	215.08	303.08	28.04	231.47	212.77	97.37	97.52	110.3	75.54	166.97	151.25	189.44	149.59	310.28	108.22	214.43	160.89	245.93	144.04	193.91	69.28	172.24	99.66	260.24	99.36	133.12	148.28	369.89	224.49	358.43	166.16	176.77	313.41	291.38	546.45	421.66	335.65	211.74	615.22	217.88
cds128	23.38	23.72	15.04	15.8	48.44	26.72	22.82	4.73	21.97	26.59	29.31	6.38	12.74	21.73	7.13	11.37	14.79	14.41	24.91	17.65	20.97	23.69	38.39	13.32	29.43	20.37	20.26	10.85	11.6	7.34	13.38	12	27.14	12.56	5.83	22.85	33.32	22.52	41.31	9.6	21.61	31.24	32.68	51.1	35.34	46.12	17.6	74.51	21.57
cds129	2.17	1.14	4.2	0	9.79	2	4.25	3	6.66	2.65	7.31	0	1.82	1.82	0	2	0	0	2.65	4.39	3.46	5.21	7.02	1	4.99	4.54	1.61	4.6	5.6	0.66	2.55	2.64	6.07	2.12	1.4	0.85	8.85	4.82	7.38	1.99	0.86	8.83	9.08	8.37	5.5	10.02	4.68	10.61	0
cds13	163.93	119.68	168.49	62.38	243.13	158.31	217.6	51.39	256.65	220.18	359.31	19.43	252.68	205.78	84.35	80.51	126.08	67.3	185.69	111.79	293.62	91.46	486.96	132.98	271.56	174.46	230.15	144.95	135.9	84.47	177.16	85.38	249.19	78.07	152	137.03	400.23	190.08	274.53	137.57	120.92	163.46	214.31	337.91	299.7	307.19	197.42	577.58	157.08
cds130	144.88	80.54	150.26	49.02	184.67	197.04	189.18	47.09	195.7	174.01	199.53	19.48	185.01	145.62	55.7	47.85	87.51	53.2	134.26	89.59	160.24	147.91	255.86	77.66	201.56	113.27	166.32	92.42	104.17	41.16	82.37	49.66	173.77	71.57	103.1	98.87	235.52	124.67	251.83	85.92	110.72	201.18	208.63	318.64	232.17	210.06	114.57	371.03	142.75
cds131	18.03	14.76	26.08	7.08	23.23	9.92	25.42	5	21.15	21.77	33.72	1	15.02	14.24	10.4	5.7	12.79	6.77	23.63	14.46	20.42	10.94	33.35	16.66	43.95	23.05	26.95	14.15	17.48	2	26.29	9.02	33.55	11.52	22.26	16.36	49.01	26.5	39.26	6.34	13.74	27.5	29.99	60.54	44.76	36.3	34.37	68.76	15.93
cds132	11.03	12.71	17.36	3.51	29.54	16.93	19.52	0	15.81	20.37	16.75	1.01	9.26	8.14	3.41	4.29	2.67	5.37	11.08	3.98	21.97	11.76	17.55	9.91	21.24	9.82	12.42	9.93	12.27	4.71	10.69	8.45	22.11	7.65	9.35	12.68	32.64	15.42	31.96	11.01	9	20.83	18.16	39.11	25.42	24.39	12.98	47.83	13.8
cds133	124.56	103.15	111.66	58.02	209.02	206.32	186.65	65.22	180.44	194.62	252.81	16.26	165.99	103.3	69.15	43.55	84.04	48.72	118.32	89.98	139.12	129.01	219.82	64.15	177.02	129.59	146.51	83.56	82.41	43.96	91.29	53.03	165.3	48.9	111.56	88.63	246.77	136.44	211.4	116.41	127.95	232.41	226.4	367.48	282.87	202.83	143.06	391.13	151.51
cds134	188.16	133.81	146.72	84.72	288.43	235.97	208.12	59.92	234.5	213.77	249.03	32.2	221.89	190.6	85.2	75.7	105.95	74.02	181.33	136.96	180.13	161.24	324.85	114.79	237.33	154.46	205.5	130.51	139.25	49.79	133.54	72.34	255.59	92.5	138.28	133.18	310.2	186.06	343.2	186.6	145.11	273.67	301.36	443.55	349.45	283.13	181.67	525.96	186.54
cds135	138.05	105.93	127.1	75.61	176.05	166.74	150.69	57.14	172.37	171.23	184.39	23.03	151.38	119.31	58.39	42.87	59.13	34.19	120.77	114.1	154.67	174.53	262.56	88.37	199.08	110.94	168.06	87.66	119.85	44.56	79.25	45.76	225.93	99.14	119.34	89	256.45	134.34	245.58	127.31	146.2	248.83	227.31	417.51	274.07	233.17	140.7	411.77	147.01
cds136	179.52	110.96	164.83	43.63	183.13	84.97	124.29	34.43	183.97	125.91	146.76	14.3	162.12	140.41	47.54	37.6	42.84	36.68	237.07	114.21	246.37	150.89	318.27	76.39	191.95	159.14	182.69	113.55	118.03	73.98	109.87	75.12	248.07	103.39	122.85	121.76	371.66	273.36	449.63	315.55	296.35	593.68	386.64	720.55	526.85	429.35	260.97	797.04	492.13
cds137	52.99	53.22	64.95	23.76	98.04	65.85	76.62	23.18	101.78	78.44	98.3	9.97	74.31	68.9	30.78	18.72	28.24	27.55	52.45	46.16	87.4	64.95	124.68	38.4	81.85	65.87	84.44	48.92	54.01	22.74	48.05	28.87	111.23	33.24	43.33	47.33	110.3	71.1	117.87	63.8	32.19	94.66	106.83	169.49	131.61	118.01	70.74	176.17	55.68
cds138	39.44	38.9	27.85	11.97	80.64	61.69	50.65	8.98	52.34	47.34	40.54	3.5	33.93	22.93	10.7	15.64	13.14	16.29	30.89	25.52	37.68	48.43	51.56	22.79	53.09	31.61	29.38	12.39	30.6	9.26	19.24	12.67	46.55	20.11	27.67	23.29	48.63	31.61	55.58	22.37	14.22	41.33	49.06	87.64	68.38	50.06	21.68	88.46	23.58
cds139	195.86	123.11	192.69	91.79	349.2	208.32	244.93	61.19	265.57	260.78	290.09	24.83	216.11	187.33	97.58	63.55	103.34	77.46	198.69	122.55	212.57	137.77	338.19	104.5	267.18	172.75	244.3	142.99	172.36	62.64	147.66	75.12	306.37	107.68	160.61	155.39	372.2	213.98	341.3	187.3	165.29	283.48	366.22	531.68	405.89	347.91	180.19	587.65	238.64
cds14	83.75	61.44	78.04	42.44	159.18	143.18	99.28	35.6	120.73	131.58	141.65	19.5	99.64	80.42	35.37	28.53	67.51	38.37	77.11	39.02	99.11	56.11	165.23	42.4	108.55	65.29	100.76	50.38	59.32	23.65	48.56	28.58	99.95	32.68	51.83	62.9	150.53	90.38	133.14	48.06	39.25	70.58	101.53	164.1	92.65	125.69	75.03	218.19	55.57
cds140	133.19	110.47	140.14	44.68	250.45	197.26	163.87	29.58	185.44	174.25	243.9	14.09	143.55	119.63	65.36	53.2	71.79	48.13	132.32	94.74	156.48	106.57	243.94	84.5	182.04	131.66	163.82	95.94	108.51	44.76	86.94	52.71	193.76	78.03	105.93	96.16	222.34	149.07	219.62	108.91	97.51	176.47	200.33	338.3	257.71	244.75	171.33	409.76	156.56
cds141	207.69	128.3	177.51	97.89	412.47	306.01	203.31	63.58	277.12	234.37	347.07	45.48	282.76	253.35	131.41	119.94	131.14	90.09	186.11	167.08	223.32	215.25	342.37	142.66	269.77	209.76	231.41	148.02	154.06	78.15	147.66	76.17	316.85	111.13	146.06	143.98	355.1	235.71	366.37	204.77	158.75	391.56	394.55	581.71	459.53	342.53	202.91	642.11	224.73
cds142	67.47	65.67	62.45	72.59	154.87	105.6	106.86	12.98	104.68	110.53	104.5	9.18	83.63	39.46	32.45	23.09	36.76	20.84	56.45	38.26	58.78	79.86	116.73	26.61	78.68	65.9	61.48	27.48	39.22	15.26	30.45	15.89	67.87	21.13	28.87	36.91	82.09	50.06	90.8	37.87	38	79.57	76.3	126.38	102.81	66.32	49.76	123.74	41.4
cds143	153.26	113.05	125.92	69.72	272.3	228	165	39.36	167.62	154.96	155.38	17.9	133.34	147.27	53.96	60.16	70.46	57.23	94.98	109.17	113.99	137.44	241.41	77.73	181.31	116.54	120.18	95.03	100.03	44.35	81.36	47.88	195.13	61.48	93.5	101.58	214.63	140.77	202.2	122.57	97.1	172.52	195.81	309.03	230.21	169.08	125.93	344.13	107.77
cds144	388.56	321.04	288.89	143.24	653.72	423.6	478.16	146.07	517.54	496.81	580.63	50.57	452.86	345.2	169.73	169.92	250.04	139.09	318.18	214.2	385.86	300.86	623.3	198.25	453.91	278.75	371.55	255.25	245.67	136.4	244.73	147.37	472.59	218.31	247.64	245.9	655.38	363.93	534.39	258.54	244.77	418.57	442.1	748.92	574.47	523.18	343.81	942.06	309.56
cds145	82.1	58.33	88.19	31.65	144.23	68.13	99.72	19.92	126.66	122.16	176.8	15.53	120.44	130.86	38.42	42.89	64.33	43.97	114.27	81.87	109.45	54.37	173.88	79.46	138.63	88.25	152.4	94.66	89.6	41.5	87.35	57.05	162.77	60.26	85.62	88.13	182.06	120.98	171.49	97.87	89.1	127.13	169.11	251.41	195.76	173.85	118.83	300.32	121.63
cds146	0.52	0	1	0	0.15	0.41	0	0	0	0	0	0	0	0.07	0	0	0	0	0.04	0.13	0.08	0	0	0.49	0.34	0.15	0.11	0	0.66	0	0.06	0	0.1	0.19	0	0.59	6.07	0.02	0.42	0.03	0.95	0.51	0	4.06	0	0.11	0.2	1	0.2
cds147	4.72	5.65	6.27	2.32	15.94	8.79	5.82	1.56	5.28	8.72	8.34	0.87	11.62	3.65	5.25	1.65	3.43	4.6	14.25	6.42	13.76	9.18	16.8	10.38	15.57	8.07	20.6	8.17	10.32	1.95	12.15	2.83	23.56	3.9	9.22	6.3	6.39	9.15	26.69	4.93	8.1	9.32	13.5	35.78	20.61	5.13	7.26	23.04	10.93
cds148	140.81	115.35	142.84	55.42	230.3	179.55	171.77	49.72	234.33	172.2	232.54	16.45	209.86	157.79	64.7	54.27	81.57	43.46	139.78	117.77	199.69	177.76	312.5	116.88	206.97	154.9	204.14	110.22	135.02	70.92	146.22	69.88	274.73	106.89	141.04	116.28	336.8	180.97	337.6	201.94	169.91	327.91	259.09	485.22	321.56	317.08	205.36	629.51	218.36
cds149	56.37	39.12	53.61	27.63	93.4	73.92	71.65	18.67	73.77	52.2	88.05	5.66	58.91	62.84	29.83	17.43	29.84	15.14	49.71	27.04	53.93	44.64	104.13	34.04	74.32	40.79	75.33	28.11	45.76	21.26	51.76	16.65	70.22	29.02	55.39	28.12	125.33	58.88	98.6	38.96	45.78	89.36	103.4	174.15	107.79	98.95	56.2	209.6	58.49
cds15	298.13	238.54	323.53	148.54	541.59	521.1	312.5	140.7	488.62	415.71	506.76	61.84	376.63	289.51	154.17	133.78	184.37	127.55	294.68	258.51	342.88	329.21	503.15	171.51	419.61	266.14	342.97	202.31	238.51	105.81	193.22	107.48	382.38	149.99	190.42	187.58	541.21	280.24	506.16	200.65	184.34	349.15	525.27	750.12	521.04	439.44	271.66	733.74	230.69
cds150	103.62	77.51	107.17	50.4	208.11	93.2	121.75	28.26	135.13	115.18	175.61	12.44	130.05	101.56	58.38	45.62	45.63	25.27	108.48	98.02	127.5	90.85	215.38	58.64	170.41	96.79	118.01	66.39	88.06	28.48	81.15	37.59	162.26	64.44	75.12	67.69	210.28	133.76	209.13	83.94	94.96	197.31	172.7	275.54	209.95	159.13	121.06	309.39	134.53
cds151	135.17	115.15	160.95	84.74	217.87	170.18	182.53	56.75	211.45	174.73	292.46	27.73	219.89	201.16	103.15	64.8	87.05	57.48	188.29	173.4	205.32	154.96	313.81	104.4	209.41	145.2	176.92	123.74	150.23	59.76	99.83	58.52	251.86	100.51	126.09	130.5	352.36	211.32	340.86	167.33	136.89	292.54	240.17	457.67	317.7	303.49	227.52	480.6	173.3
cds152	20.99	14.98	19.1	8.83	38.48	32.77	22.83	6	28.26	15.92	24.01	4.26	34.49	13	7.5	11.2	8.43	6.5	7.83	12.67	20.58	18.88	38.24	9.92	24.9	14.44	24.12	13.56	15.5	6.02	16.21	5	32.12	19.21	26.49	7.42	40.32	23.64	34.1	16.79	13.84	32.74	36.75	54.14	39.61	23.9	14.73	60.78	23.26
cds153	24.76	16.48	29.52	14	38.16	24.1	24.06	5	33.07	35.12	33.21	1.56	41.31	23.6	11.07	10.2	9.42	3.18	33.12	21.9	45.84	28.96	56.66	14.96	48.43	25.06	39.51	25.91	22.69	11.58	23.2	17.96	45.68	19.92	26.8	25.77	70.8	34.85	64.15	29.26	18.73	41.62	46.02	86.39	66.95	49.32	41.35	114.91	25.88
cds154	10.19	6.61	5.91	0	24.64	4.93	5.89	0	11.19	14.63	14.92	0	12.69	14.84	6.01	6.46	3.84	5.02	10.79	6.69	11.26	6.86	14.21	8.36	17.04	6.6	20.12	5.62	5.98	1.21	5.98	4.35	15.65	6.96	6.3	6.57	13.81	9.78	13.38	6.25	9.82	20.97	16.58	24.74	16.93	24.23	7.41	33.25	9.88
cds155	20.76	28.55	33.58	1.95	37.53	26.05	33.75	14.01	54.87	52.78	38.43	7	37.52	49.16	9.74	9.03	16.02	13.1	42.58	24.39	36.42	56.09	70.54	27.2	51.78	32.37	39.56	35.71	28.63	21.88	22.65	17.77	45.79	17.02	30.41	17.72	63.25	49.86	59.78	31.26	31.2	75.56	60.61	88.07	53.69	67.59	33.3	87.34	34.54
cds156	277.74	175.71	255.95	92.13	432.09	250.08	264.69	100.47	382.79	247.18	360.22	38.14	279.92	284.87	143.26	83.44	126.4	91.24	203.64	150.17	256.14	218.58	385.9	114.69	281.06	167.33	292.6	138.84	200.16	80.12	134.82	83.91	309.74	92.81	169.8	159.96	350.36	216.05	368.68	190.15	161.34	354.69	301.68	518.18	338.75	336.32	213.55	575.07	217.11
cds157	35.28	17.93	13.89	13.15	42.98	46.16	32.45	6.29	36.45	32.79	42.5	6.52	31.97	22.39	15.23	16.21	23.53	14.74	23.47	13.51	20.7	13.71	48.05	7.03	32.68	22.1	22.87	10.6	22.88	8.12	10.53	6.08	38.59	8.43	17.61	22.22	45.7	17.52	32.6	10.94	14.13	32.15	26.99	43.69	26.26	28.91	20.01	55.33	14.01
cds158	3	1	2.72	0.47	1.72	4.41	1.88	0	2.19	5	4.52	0	1.94	0.41	1	2.79	2.28	2.49	0.34	0.1	4.5	0	7.25	1	5.89	3	2	2	4.5	0	0	1.2	4.87	0	1	2	7.05	1.88	3.68	2.81	3.36	3.92	4.66	4.31	3.02	5.06	5	12.14	3.5
cds159	0	0	0	0	0.18	0	0	0	0	0	0.27	0	0	0	0	0	0	0.43	0	0	0	0	0	0	0	0	0	0	0	0	0	0	0	0	0	0	0	0	0	0	0	0	0	0	0	0	0	0	0
cds16	247.59	180.6	184.87	103.07	319.46	258.37	245.82	53.94	360.66	247.06	322.23	33.71	267.61	221.72	113.14	92.49	146.66	87.87	198.74	150.55	248.97	188.15	382.48	150.52	283.75	186.77	265.73	132.13	185.95	70.95	140.69	81.75	329.76	119.59	156.76	134.02	428.83	176.5	372.18	162.44	134.5	238.96	323.5	525.73	311.73	340.33	185.45	614.66	151.6
cds160	28.81	16.43	18	11.75	30.42	36.39	20.99	8.42	33.01	37.53	39.09	3.42	35.11	30.16	10.75	7.49	8.99	4.88	16.24	12.48	27.74	19.18	43.95	12.96	30.4	15.62	20.65	17.91	26	6.85	12.5	8.6	28.42	13.2	15.89	14.23	48.24	21.46	38.75	15.03	28.28	28	33.45	67.68	48.63	35.5	20.68	78.8	13.33
cds161	1	0	1	0	4.41	0	4.28	0	6.76	7	29.09	4	56.42	55.88	26.69	43.62	7.98	3.26	75.11	29.81	107.12	42.68	121.02	23.65	80.33	52.39	103.6	68.12	51.61	23.64	72.39	36.36	155.29	81.11	84.07	68.8	124.24	78.16	105.76	68.91	53.56	111.86	115.85	191.44	136.72	163.32	85.86	320.93	131.27
cds162	45.04	33.83	40.95	13.57	56.48	52.68	54.52	16.31	46.95	70.16	52.7	6.02	42.56	32.78	20.64	12.22	29.73	14.25	37.4	26.73	34.44	45.96	65.81	22.28	56.55	34.88	41.37	19.07	22.99	6.56	32.05	16.22	50.65	17.83	14.1	18.52	50.92	45.75	56.82	46.13	26.48	53.05	55.36	65.66	59.53	44.98	48.39	87.54	44.03
cds163	33.33	21.13	34.84	14.03	57.14	41.57	40.66	17.68	43.27	34.2	58.05	6.72	40.22	39.13	16.32	18.9	12.03	9.82	39.32	39.35	51.76	29.57	68.3	22.53	51.06	36.67	28.23	26.36	24.36	18.28	24.83	14.96	56.52	22.99	25.93	26.08	69.2	36.67	61.16	44.67	46.23	49.85	49.75	119.47	97.98	68.36	39.57	119.56	52.49
cds164	7.3	3.27	3.81	0.06	11.3	3.8	9.33	1.77	9.65	3.53	8.8	0	8.8	6.23	2.37	2.12	1.43	0.22	7.12	4.59	6.58	5.72	4.39	4.16	4.63	6.3	5.19	7.05	6.18	3.65	3.25	2.91	9.29	4.15	3.41	5.33	13.06	6.72	9.89	7.28	5.19	7.18	8.25	18.57	13.32	14.25	3.32	14.81	5.89
cds165	1	0	0	0	0.88	0.62	0.34	0	0	1	0.2	0	0.43	1.04	0	0	0	0	0.13	0.63	0.47	0	1.39	1.06	1.45	0.4	0	0	0	0.72	0	1	0.5	0	0.88	0.49	1.54	0.88	1.52	0.59	1.61	0	0.51	3.35	3.27	1.93	0.59	4.9	0.76
cds166	0	0	0	0	0.07	0.04	0.09	0	0	0	0	0	0	0.89	0	0	0	0.57	0	0	0	0	0	0	1	0	0.3	0	0	0	0	0	0.22	0	0	0.26	0.18	0	0	0	0	0	0.22	0.17	0	0.07	0	0.35	0.31
cds167	0	0	0	0	0	0	0	0	0	0	0	0	0	0	0	0	0	0	0	0	0	0	0	0	0	0	0	0	0	0	0	0	0.54	0	0	0	0	0	0.43	0	0	0	0	0	0	0.21	0	0.35	0
cds168	302.99	206.22	256.58	126.14	452.4	283.99	389.78	85.34	477.73	338.43	503.36	36.52	335.87	296.06	140.16	134.38	170.65	118.78	244.05	181.92	257.55	212.77	450.33	148.91	365.89	214.54	314.59	196.26	216.92	103.05	219.58	115.7	381.52	135.53	188.03	151	529.54	287.3	475.45	235.41	228.85	403.81	344.85	660.23	429.55	405.66	280.04	809.61	235.43
cds169	24.74	13.55	21.93	17.9	36.63	16.7	25.75	10.41	24.34	14.96	21.87	5.04	23.99	24.11	12.97	6.36	10.88	7.02	21.41	12.73	18.97	28.69	38.91	11.12	40.79	23.19	32.87	18.33	16.67	17.24	12.11	8.01	26.9	16.25	18.49	19.8	47	30.54	39.03	22.17	14.46	32.8	37.36	64.34	37.13	44.66	18.87	67.88	17.84
cds17	458.84	341.53	397.85	283.69	861.1	683.42	547.39	170.12	739.5	587.46	725.36	63.84	546.75	478.03	242.91	192.01	364.55	194.78	453.02	283.55	496.39	453.79	878.08	275.82	630.02	406.46	532.35	274.21	368.49	155.73	297.31	147.71	625.34	196.21	325.35	259.2	768.96	390.09	788.91	304.44	260	491.25	627.38	1117.65	749.85	683.7	394.76	1144.93	310.3
cds170	38.23	18.45	31.44	14.37	32.67	32.97	39.46	4.68	47.68	39.37	54.72	2.79	34.5	30.32	9.6	15.28	14.74	10.59	33.4	27.86	37.78	46.05	51.16	27.77	44.76	33.77	37.73	25.73	22.75	13.67	31.08	18.68	52.36	22.37	30.68	21.41	56.26	42.69	52.96	37.5	22.37	52.04	57.83	92.43	74.79	53.21	42.36	85.34	37.38
cds171	0	0	0	0	1.03	3.19	0.89	0.06	1	0	1.06	0	0.02	0.58	0	0	2.52	0	2.05	0	0	1.36	0.46	0.5	2.23	0.08	1.14	0	2.23	0.68	0.27	1	0.52	0	1.04	0.5	2.07	0.36	0.1	0.1	0.93	1.54	0.63	2.15	1.74	0.22	0.67	1.61	2.72
cds172	69.17	50.87	58.92	23.91	89.5	72.26	70.34	14	99.34	67.55	88.41	1	93.46	50.81	22.52	16.85	21.24	31.71	63.39	36.2	86.35	76.14	146.85	33.64	98.2	47.68	82.39	44.52	37.57	28.93	41.55	30.55	98.69	32.39	52.91	57.65	117.14	62.24	108.85	55.99	58.6	90.36	87.79	172.39	121.62	118.6	76.33	200.37	79.57
cds173	25.6	17.2	31.62	5.27	63.19	33.48	35.31	6.93	59.69	44.54	72.92	5.47	45.22	58.19	47.79	39.77	20.26	30.67	60.74	50.8	79.21	53.72	100.46	26.88	63.15	49.4	91.49	57.59	114.79	58.43	78.6	41.19	160.57	62.14	91.05	72.54	120.07	73.3	109.31	58.96	40.07	92.88	98.57	158.18	134.29	151.21	80.39	277.17	100.26
cds174	30.07	12.79	29.71	10.38	63.38	40.14	40	5.18	33.2	43.89	38.57	8.25	36.55	55.88	24.83	19.03	7.11	12.73	28.77	28.09	40.47	32.82	51.11	14.58	41.92	29.5	46.54	24.7	25.54	11.52	20.52	15.56	49.2	14.51	24.37	30.23	50.77	29.18	42.75	31.31	24.4	45.26	57.53	72.82	67.59	56.2	28.33	89.05	37.32
cds175	2.3	0	1.27	0	0	0	1.98	1	1	1.9	4.67	2	5.24	3.38	2	5.1	3.12	0	7.85	3.76	5.7	1	7.73	3	3.62	6.25	3.5	6.36	8.21	3	10	7.25	12.07	9.96	1.49	4.96	11.79	9.49	6.46	3	5.95	6.22	2	10.34	6.66	10.93	3.5	16.23	4.88
cds176	103.4	87.15	111.89	58.77	156.25	125.57	109.6	40.39	140.46	118.7	163.84	9.32	110.21	101.18	44.62	33.44	42.52	39.26	114.65	78	110.97	102.31	183.27	72.82	158.8	101.16	107.29	73.81	76.97	35.65	77.55	40.27	127.98	68.81	78.63	61.09	227.47	135.97	212.3	105.63	80.99	144.71	164.11	301.94	240.38	163.61	122.96	315.38	125.72
cds177	181.43	142.45	167.65	93.45	256.2	245.94	231.46	65.26	266.23	222.3	279.3	28.79	293.65	218.42	104.83	83.98	110.36	71.83	211.7	151.6	241.64	208.72	455.77	138	346.38	193.08	296.63	148.55	164.28	48.03	142.02	84.49	318.21	100.49	161.25	143.4	381.29	216.49	364.26	145.26	134.97	274.96	299.76	552.75	340.61	333.96	221.64	569.87	185.33
cds178	88.76	55.66	88.51	25.68	147.21	90.5	78.99	25.74	123.27	101.89	148.98	14.65	138.4	121.32	39.32	43.98	41.28	32.9	109.7	94.27	116.6	103.47	206.53	71.67	158.11	97.7	131.13	90.16	87.61	36.09	82.33	41.94	169	59.02	85.94	81.76	200.03	127.5	184.46	96.59	86.47	202.87	189.62	318.13	214.27	216.06	117.44	327.01	145.43
cds179	35.35	19.99	25.49	4.16	37.03	13.68	31.4	6.61	27.96	23.87	48.26	4	23.12	22.23	6.71	5.71	6.57	5.17	30.11	11.62	24.59	3.77	42.29	11.75	35.77	38.16	19.48	20.31	8.23	5.47	14.97	5.43	25.81	10.17	14.17	11.51	28.85	24.69	36.95	7.09	7.35	16.03	24.22	40.47	32.73	20.85	16.1	39.81	11.61
cds18	251.62	207.94	252.57	194.32	425.63	386.47	307.4	98.73	377.48	382.84	444.89	48.45	301.13	295.22	118.14	125.12	181.73	120.75	265.47	125.11	282.13	226.48	528.33	162	376.73	239.93	343.13	186.63	234.73	86.47	201.41	123.49	421.08	107.11	199.57	151.16	528.46	236.6	447.38	151.68	142.78	234.85	342.06	748.17	411.15	400.5	238.66	758.87	178.61
cds180	3.29	1.65	1.61	1.49	7.31	4.89	3.25	2.28	6.04	6.79	6.83	0.46	2.16	3.56	3.68	1.91	1.01	0.49	1.71	0.86	3.34	4.32	7.99	3.35	7.66	6.04	5.32	1.11	1.82	0.95	1.8	1.42	8.37	1.12	4.15	1.59	2.99	1.86	3.46	2.26	1.67	5.11	7.36	9.4	8.13	9.03	3.18	9.53	4.81
cds181	27.03	17.69	41.59	13.03	58.64	25.71	56.35	4.69	62.37	45.3	55.22	2.86	45.64	52.13	21.09	11.28	19.32	14	31.32	33.56	32.93	45.04	52.21	20.46	52.08	37.59	58.78	46.51	42	17.79	26.96	28.7	60.2	27.1	35.64	24.46	78.14	54.5	77.18	55.75	50.92	87.31	63.91	125.09	109.77	79.91	51.27	135.34	65.12
cds182	71.5	40.32	46.66	12.03	87.95	72.74	58.96	16.5	63.46	55.06	66.86	14.86	54.13	44.83	24.47	19.56	29.18	17.51	58.95	39.29	66.07	56.02	94.53	30.29	80.82	53.06	53.84	46.11	50.05	14.63	42.94	19.54	77.7	19.96	38.93	31.8	106.18	53.02	99.07	41.97	38.48	77	83.36	158.84	90.62	99.72	59.58	186.68	54.21
cds183	399.48	357.82	340.5	178.3	618.76	362.5	514.64	147.81	596.07	504.52	656.76	82.99	457.54	414.89	216.04	159.32	279.92	176.08	399.49	254.62	453.35	302.78	685.76	232.69	579.18	334.46	492.94	271.66	336.35	141.88	275.36	157.36	507.66	220.31	284.3	276.28	669.4	411.11	671.28	278.2	283.15	454.07	571.33	904.5	644.71	601.01	400.69	1065.72	335.93
cds184	50.85	44.78	60.34	64.36	112.56	123.81	78.81	22.48	84.58	105.37	94.27	3.47	67.71	58.66	31.1	26.17	41.4	21.74	36.45	39.01	54.43	53.36	79.69	39.98	73.8	47.81	57.11	39.15	44.28	11.26	37.43	22.77	62.06	39.85	32.74	42.88	83.38	49.97	88.64	54.2	35.36	71.77	110.99	132.71	102.2	78.15	53.54	138.33	63.74
cds185	1	0	0	0	2.23	3	1.18	3.81	2.92	4.23	5.05	0	6.77	6.42	3.35	5.18	1.34	0.78	9.05	5.21	9.06	4.86	7.22	2.51	5.33	8.87	10.52	7.16	4.49	2.78	5.97	3.03	17.77	4.59	10	6.7	9.04	4.09	4.42	4.09	6.28	11.76	7.03	9.94	5.12	7.98	7.36	17.23	6.32
cds186	0	0	0	0	0	0	0	0	0	0	0	0	0	0	0	0	0	0	0	0	0	0	0	0	0	0	0	0	0	0	0	0	0	0	0	0	0	0	0	0	0	0	0	0	0	0	0	0	0
cds187	0.02	0	0.51	0.9	0.03	0.26	0.67	0	0	0.75	0.79	0	0.05	0.1	0.25	0.25	0	0.29	0.99	0.14	0.07	0.33	0.6	1.11	0.63	1.83	0.14	0.78	0.15	0.41	0	0	1.12	0.9	0	0.64	0.31	1.5	1.04	0.32	0	1.9	1.82	1.16	3.25	2.03	1.27	1.19	0.58
cds188	24.45	16.89	33.36	7	37.27	36.34	30.58	9.82	43.22	41.24	58.02	5	33.78	28.22	9.03	6.96	7.57	2.37	35.06	25.56	50.37	37.77	81.09	18.05	41.46	49.43	58.08	16.54	20.41	18.29	35.4	12.94	62.85	20.09	31.03	35.03	76.6	38.43	87.33	43.39	37.69	60.31	60.14	128.52	78.45	75.16	46.23	150.89	47.25
cds189	14.2	18.07	24.11	12.88	41.26	41.32	28.48	9.5	24.94	29.95	48.84	3.77	27.15	30.96	11.93	8.98	8.76	11.71	18.04	22.72	18.69	23.4	28.77	15.93	17.27	17.55	33.51	14.09	19.03	5.94	9.25	6.63	27.64	12.05	17.96	10.91	24.39	25.51	33.02	22.56	20.6	30.61	37.36	41.31	33.45	23.84	32.33	50.38	18.76
cds19	291.27	281.06	328.56	231.38	474.43	477.8	369.42	127.58	452.49	428.76	533.2	57.08	367.42	312.32	144.41	125.99	193.8	129.65	231.85	152.4	293.86	170.75	493.32	175.81	381.41	272.45	384.8	239.28	276.17	121.67	237.81	124.11	428.7	165.9	247.57	228.9	596.18	323.68	401.84	208.26	189.13	220.51	420.61	692.96	565.56	486.15	304.93	955.54	268.6
cds190	33.72	23.04	25.29	17.23	66.55	42.95	39.97	5.68	35.14	44.15	43.07	2.91	30.14	30.43	8.2	9.36	17.22	12.74	30.01	27.17	40.93	42.51	69.44	15.73	44.36	26.34	36.48	25.98	28.08	8.34	18.24	5.73	42.02	16.96	18.66	18.23	63.08	29.07	71.73	26.71	21.84	45.38	39.37	88.63	46.24	47.18	31.76	95.79	31.05
cds191	169.03	120.4	144.46	87.87	189.19	145	173.88	59.58	240	197.36	268.37	25.67	191.74	180.45	62.15	50.89	86.34	41.99	155.09	145.26	178.23	204.76	374.36	84.75	245.48	160.93	230.85	130.58	153.47	48.95	138.72	73.6	329.75	106.15	152.44	133.65	346.9	215.85	353.38	184.38	196.18	322.62	294.59	532.5	322.94	295.41	218.2	594.03	189.93
cds192	102.54	88.21	116.58	72.43	125.65	147.96	126.29	59.63	168.77	138.84	182.68	18.76	131.89	125.42	57.48	34.81	48.93	30.68	125.77	100.81	141.59	129.52	282.65	87.21	184.73	120.07	138.76	106.18	124.52	40.75	104.21	60.75	208.89	70.92	92.82	89.62	262.39	172.33	258.59	128.89	149.66	246.01	209.65	401.5	321.94	243.51	162.51	459.25	168.82
cds193	38.53	19.87	29.15	7.5	56.94	34.22	43.71	9.64	46.37	40.3	56.77	1.7	64.66	53.05	15.63	14.85	19.81	10.69	43.11	33.51	57.13	47.66	81.06	28.85	55.86	34.84	50.85	34.5	36.54	24.05	24.83	21.34	71.35	26.72	29.53	32.59	85.62	47.35	88.02	45.64	43.45	75.25	55.55	103.96	83.38	81.09	48.28	125.95	55.87
cds194	5.03	3.83	5.43	0.02	6.62	3.26	6.42	9.57	1.36	5.62	7.63	0.03	5.24	3.1	2.37	2.64	2.24	2.9	3.72	3.61	8.32	3.67	5.28	4.54	3.85	6.95	4.53	1.04	0.9	0	4.13	1	5.74	0.06	4.13	6.05	6.86	4.1	7.5	2.47	3.22	5.8	4.57	15.01	7.04	11.44	0.92	15.93	4.13
cds195	0	0	0.07	0	0	0	0	0	0	0	0	0	0	0	0	0	0	0	0	0	0	0	0	0	0	0	0	0	0	0	0	0	0	0	0	0	0.33	0	0	0	0	0	0	0	0.27	0	0	0	0
cds196	14.03	8.74	9.37	2.99	24.95	6	11	9	13.9	11.13	15.65	0	8.67	8.82	7.14	2	4.32	3.19	8.87	3.26	10.32	25.03	26.83	3.88	11.61	4.74	10	6.5	8.1	1.38	9.73	4	16.44	9.78	9.99	7.55	19.71	7	15.39	12.83	4.17	11.6	18.7	21.9	23.41	14.9	7.82	28.74	15.44
cds197	7.76	7.66	7.64	3.1	18.77	15.43	11.45	4	14.82	10.29	9.39	1	1	4.57	2.03	6.19	6.24	2.91	12.33	4.5	8.23	7.49	20.37	3.91	8.33	5.51	14.3	7.83	2.5	5.79	4.9	2.91	15.7	1	9.37	3.88	13.17	1.44	20.88	5.23	5.02	9.07	6.35	23.34	17.54	12.45	8.72	24.9	8.95
cds198	89.41	68.42	83.07	56.33	193.8	105.55	101.2	44.57	120.94	129.2	146.93	12.74	115.19	107.25	47.86	31.74	48.42	39.37	104.56	70.09	109.07	93.52	203.32	57.7	138.85	105.13	126.71	85.12	103.58	27.67	83.74	47.64	143.94	63	101.5	77.3	178.81	109.38	186.03	73.46	80.01	155.37	184.32	293.18	197.78	165.79	86.82	300.03	95.08
cds199	37.1	40.04	47.13	23.63	76.61	54.45	41.5	38	65.72	63.81	69.26	7.38	45.23	46.29	23.76	16.66	12.55	17.03	40.62	30.12	46.76	38.02	94.07	29.2	72.24	53.79	63.54	41.49	38.79	9.85	30.65	24.28	73.2	24.95	34.84	37.95	83.22	49.11	92.82	36.47	29.11	69.13	96.42	135.57	101.66	65.71	42.02	141.13	48.48
cds2	227.79	163.58	205.25	74.21	450.09	276.87	264.12	49.79	316.38	269.85	301.13	37.15	239.64	188.52	100.26	79.79	151.94	77.42	198.1	149.92	215.77	210.97	352.22	106.74	281.03	153.27	227.03	114.69	137.33	68.22	124.66	60.52	248.37	101.13	139.7	136.49	340.6	202.94	315.01	142.49	149.54	292.95	345.76	491.17	338.9	307.21	192.99	529.99	172.63
cds20	4541.38	3451.6	4094.71	2444.52	6553.14	5680.3	5294.27	1639.6	6672.55	5546.95	6423.43	749.74	5265.05	4070.91	2098.67	1712.74	2883.5	1760.03	3784.46	2844.39	4544.44	3937.28	7835.84	2249.26	5891.71	3769.69	5211.77	2645.99	3648.55	1433.93	3132.03	1678.51	5797.3	1989.07	2976.15	2650.42	7890.92	4067.25	6692.58	2772.78	2551.91	4579.59	5647.88	10115	6259.22	6233.05	3871.66	11383.3	2932.58
cds200	424.81	317.13	418.47	166.78	667.05	498.41	464.1	136.69	641.84	563.04	774.63	81.19	706.8	581.5	247.65	210.2	262.63	134.17	441.06	373.24	663.54	443.66	1030.4	314.05	720	491.19	661.64	403.54	441.25	204.77	380.85	235.76	754.8	314.59	378.06	372.07	947.11	540.64	826.14	383.85	322.43	646.2	775.12	1216.34	793.85	790.98	472.08	1439.8	398.05
cds201	132.54	79.9	165.94	50.23	236.87	167.71	188.71	64.54	273.2	220.62	209.3	18.36	175.29	140.51	72.08	54.46	48.05	35.94	135.65	99.13	200.02	129.01	292.98	99.26	178.77	124.45	209.36	109.88	119.71	53.52	119	68.81	218.92	85.46	120.76	82.1	373.2	164.64	246.23	113.28	104.62	198.85	229.1	374.09	273.08	311.92	135.52	498.44	154.39
cds202	20.29	13.75	17.53	5.97	48.96	21.6	18.72	3.49	18.3	29.57	26.82	4.29	22.92	11.11	15.53	13.39	12.6	5.22	18.45	19.51	25.68	19.21	29.39	15.47	25.83	13.58	20.62	17.23	13.57	2.28	13.67	7.81	21.54	10.42	5.85	11.88	26.39	13.9	29.7	12.17	12.54	23.56	24.64	35.83	39.79	27	11.77	38.26	16.7
cds203	82.81	64.53	88.76	31.77	204.89	111.84	125.46	46.66	113.36	119.61	137.76	14.61	108.89	90.36	71.41	68.52	50.47	37.68	104.67	51.6	102.64	88.93	160.51	45.82	141.82	67.8	97.66	75.2	59.56	31.17	58.38	38.68	131	47.28	71.85	76.72	143.85	87.51	153.08	75.22	73.15	130.75	121.39	262.71	153.17	170.56	72.38	271.19	81.76
cds204	324.91	242.48	311.68	159.34	418.78	239.86	425.87	114.13	458.63	413.64	501.6	53.99	449.67	370.53	188.38	121.54	209.78	137.14	279.12	191.65	353.93	268.55	566.08	178.03	399.02	286.88	405.86	210.91	251.81	105.03	246.62	127.38	435.18	156.54	198.07	219.24	516.13	299.13	519.89	230.45	208.96	354.96	393.26	650.28	477.62	447.6	309.89	797.14	275.13
cds205	45.14	41.61	33.54	16	100.69	76.2	57.71	9.27	55.91	62.69	60.04	4.58	36.38	40.77	23.64	17.79	30.61	15.52	36.34	38.28	36.18	36.35	58.42	18.87	47.36	36.89	42.44	32.53	28.86	10.12	26.99	20.83	58.09	14.97	28.16	21.63	70.61	39.99	62.64	32.21	26.19	56.02	62.29	90.8	73.9	54.18	36.26	105.81	42.32
cds206	66.87	49.86	57.65	25.9	145.01	103.1	70.32	17.85	88.89	96.72	111.12	12.06	106.4	81.35	59.08	38.19	42.77	36.82	83.77	47	70.13	57.34	115.91	43.25	95.3	57.03	85.34	54.7	41.95	27.59	61.13	31.38	84.14	49.43	64.09	61.08	141.8	82.25	138.95	77.01	82.07	135	115.38	195.18	178.28	158.9	76.46	231.9	90.71
cds207	96.1	55.68	71.41	27.53	121.9	100.83	92.26	18.25	130.39	95.02	106.53	8	101.72	66.5	34	28.3	35.88	20.35	68.05	50.69	95.74	77.72	168.2	62.46	135.69	75.52	103.79	68.76	68.54	21.13	51.63	33.1	117.57	35.92	52.95	54.41	166.82	85.08	166.86	58.84	70.78	129.23	129.03	218.02	169.71	154.71	94.27	260.08	81.66
cds208	0	1	1	1	3.78	1	4.34	1.64	3.62	3.81	14.28	0.89	17	18.43	36.84	38.41	10.94	4.78	40.75	40.48	107.73	61.19	143.78	24.93	58.12	42.11	55.13	35.27	47.64	18.82	83.53	40.26	194.2	69.99	47.92	44.06	57.19	39.4	36.95	19.71	21.63	42.86	54.36	52.68	41.33	70.31	30.2	114.4	28.17
cds209	36.97	17.94	27.18	3	49.79	47.57	29.5	13	36.33	44.06	45.85	1	35.47	41.45	20.24	9.92	13	13	29.67	28.21	36.33	35	64.56	20.39	38.48	33.38	55	23.13	19	10	25.99	12.5	58.14	11	31.79	26.65	55.27	38	60.2	36.58	28.98	61.04	47.42	60.5	53.35	56.2	59.6	81.14	40
cds21	8.72	6.39	6.32	3.18	22.7	6.79	11.94	4.5	12.26	7.55	6.21	2	8.52	2.55	2	2.77	7.84	2.52	9.19	2.58	9.79	7.04	22.07	8.08	21.5	7.68	13.43	4.66	4.85	4.01	5.28	2.46	17.01	2.71	8	8.13	17.63	8.13	20.74	16.51	10.06	14.62	7.51	22.79	22.98	17.79	6.63	29.78	13.02
cds210	157.41	127.97	199.11	71.37	159.23	110.71	130.93	37.39	191.39	150.49	175.07	30.74	124.92	102.33	35.46	37.86	40.59	35.1	169.93	105.17	171.68	112.85	281	88.86	230.97	131.11	174.35	100.8	91.75	46.66	87.6	66.36	188.73	81.14	91.48	123.79	298.68	190.55	309.36	192.43	158.16	257.32	287.71	512.21	323.97	315.36	181.72	476.58	223.69
cds211	18.65	15.33	24.19	7.28	45.41	23.15	27.73	3.35	28.9	21.34	32.62	8.07	14.81	22.08	8.88	5.42	5.44	5.36	24.77	10.42	34.14	8.35	38.07	18.49	49.86	17.12	23.16	10.01	11.97	8.31	18.32	7.05	27.98	8.3	12.76	11.18	41.19	17.15	28.59	18.86	17.46	23.17	26.91	59.92	46.21	36.84	18.37	64.95	23.81
cds212	42.16	41.04	29.57	15.95	79.81	48.48	67.64	15.92	81.97	59.15	75.83	8.09	52.97	43.51	18.7	20.25	32.33	20.97	65.76	32.66	65.32	45.93	97.91	30.59	74.63	44.33	74.75	29.98	39.52	18.69	28.83	21.79	89.7	28.71	48.99	42.52	107.04	47.46	110.6	57.19	43.08	97.58	87.68	170.25	122.01	103.73	61.15	174.37	69.64
cds213	3.81	2.3	2.07	0	5.58	2.45	0.71	0	1.67	3.8	5	0	5.23	6.11	5	2.11	3	0.85	3.71	5.68	6.17	6.55	5.29	5.39	10.18	4.14	6.89	5.82	8.32	0	6	3.81	8.69	6.44	1	4.34	8.28	6.85	14.73	6.42	6.2	18.69	21.83	26.21	15.34	16.63	5.95	42.95	19.84
cds214	218.01	170.35	205.26	117.84	501.47	286.34	271.77	80.07	347.5	314.46	370.5	36.94	236.08	268.89	135.99	116.35	126.91	124.48	175.09	174.64	224.14	179.35	321.67	134.97	264.37	199.65	267.29	163.22	156.61	69.3	133.38	92.08	294.74	121.05	161.7	132.66	350.84	206.48	374.39	220.87	224.35	403.51	350.48	528.5	380.07	297.65	218.76	510.94	237.4
cds215	70.28	47.75	61.38	19.21	129.57	152.68	76.12	55.28	77.27	104.29	103.55	9.87	61.15	52.39	33.11	19.8	35.29	25.38	60.27	41.05	63.04	49.06	70.52	23.61	72.54	61.02	56.14	37.53	37.96	10.51	35.43	16.39	68.95	27.74	31.97	31.99	91.25	51.49	80.42	46.37	53.42	86.53	87.6	121.71	92.98	82.87	55.69	136.47	58.41
cds216	49.71	37.35	37.21	24.06	99.38	67.58	66.52	17.87	56.45	61.27	72.15	5.81	41.64	44.03	13.39	17.32	20.09	8.68	32.45	24.63	39.7	37.52	55.53	16.8	39.56	43.16	37.94	19.59	25.64	6.94	20.76	14.62	44.09	11.9	21.65	20.79	58.56	29.59	64.21	32.84	17.86	53.03	65.05	94.76	56.19	50.71	33.21	109.84	49.16
cds217	0.1	0.07	0.21	0	0.62	0.13	1	0	0.22	0.15	1	0	0	0.12	0.07	0.06	0	0	0	0.17	0.74	0	4.43	1.98	1.06	0.19	1	1	0	0.1	0.99	0	1.32	0	1.23	0.49	0.12	0.35	1.49	0.11	0.13	0.68	3.59	5.49	1.18	0.65	0	0.78	0.11
cds218	0.35	1.08	0	0	0.86	0	0.98	0	0	0	0.7	0	1.14	0	0	0.99	0	0	0	0.38	0.42	1.21	0.7	1.84	2.01	0.51	1.16	0	0.69	0	0.87	0.34	2.04	0.61	0.97	0	1.14	1.57	0.94	0.77	0.59	3.13	0.37	3.59	0.9	1.45	0	1.85	1.21
cds219	266.73	216.26	355.56	178.48	371.75	308.94	308.88	77.12	521.82	330.26	553.28	44.37	382	298.63	137.09	85.67	159.54	101.68	343.91	249.32	385.26	301.94	695.48	190.73	497.14	294.87	578.5	266.1	327.8	151.31	375.76	213.73	615.12	225.55	346.85	305.67	1004.17	451.18	658.7	404.68	419.91	690.09	627.37	1177.08	887.32	838.93	467.2	1527.15	488.39
cds22	6.65	5.17	7.77	1.85	20.73	29.86	10.27	0.93	12.67	12.78	10.95	0	6.81	7.02	4.3	2.08	7.36	2.09	7.32	8.98	11.99	13.08	22.36	7.55	17.09	6	10.43	4.41	6.89	2.06	6.86	5.93	23.1	1.41	7.09	5.93	20.62	8.63	20.59	10.38	11.52	28.42	24.91	20.44	20.72	19.82	10.89	31.02	26.72
cds220	107.62	79.45	91.14	44.02	155.65	151.89	131.94	29.71	147.45	134.79	137.26	12.34	121.09	119.97	71.53	55.79	62.42	39.64	92.53	88.4	115.98	108.51	164.32	59.73	113.22	68.13	109.46	73.94	92.16	24.33	68.85	40.44	140.99	49.85	86.4	78.95	175.18	101.89	170.69	98.54	85.28	160.95	126.01	247.13	150.13	134.78	85.57	255.83	96.34
cds221	122.88	118.58	120.92	56.73	235.68	130	151.62	30.91	203.48	155.21	209.32	10.92	144.49	114.26	63.71	50.49	72.01	46.52	104.2	102.4	148.32	87.58	208.75	84.5	167.64	119.45	153.84	91.02	98.65	35.28	74.69	46.99	156.21	56.82	89.69	99.79	229.49	136.87	187.8	144.81	123.49	166.46	197.77	341.13	235.2	200	121.31	371.35	132.47
cds222	54.22	44.4	43.97	21.12	96.77	53.38	74.59	15.25	70.15	74.15	68.51	5.07	53.26	50.3	16.08	23.91	32.75	14.85	66.31	55.9	90.4	66.3	114.51	49.12	84.96	66.02	83.56	56.34	53.67	23.72	44.33	30.35	78.03	37.85	45.84	50.96	98.98	79.47	143	74.03	64.07	127.5	105.61	193.55	123.47	97.06	79.29	167.83	75.48
cds223	47.39	28.04	71.16	31.96	82.22	42.92	51.25	15.35	77.44	71.96	90.76	4.87	66.19	57.52	25.36	26.3	11.86	12.97	66.1	74.44	71.26	65.19	119.64	42.8	79.01	83.26	79.15	42	46.92	19.47	48.99	23.32	100.13	32.81	67.37	58.53	134.36	73.98	105.83	73.75	64.03	106.08	103.38	181.18	141.84	125.91	80.64	255.8	87.63
cds224	21.44	20.51	20.84	9.5	38.49	19.48	19.87	4	20.98	15.93	23.39	0	16.18	16.69	6.5	7.08	10.35	8.5	15.5	16.8	22.48	21.82	39.95	11.64	42.73	28.76	25.42	22.29	15.15	4	16.61	3.46	40.41	11.5	16.5	7.49	56.34	18.5	37.54	24.22	14.71	39.88	26.44	61.24	31.51	35.51	18.56	80.81	15.08
cds225	0.81	3.6	6.05	2.76	8.53	4.17	3.12	0	5.32	9.49	7.84	0.46	4.51	3.99	1.4	0	1.36	1.87	7.15	6.31	6.42	5.27	10.72	3.3	4.71	6.54	3.49	2.98	2.29	2.56	4.82	0.32	7.02	1.94	6.01	5.06	8.23	3.77	7.8	3.03	3.66	7.27	8.69	12.6	7.84	8.75	3.44	13.12	5.57
cds226	29.48	17.75	13.21	8.41	25.5	37.37	21.7	3.56	28.08	14.74	24.2	3	25.72	24.6	5.84	8.63	8.55	6.88	18.5	15.35	37.91	25.37	51.73	13.84	44.85	16.92	31.44	11.76	15.63	6.97	11.27	3	34.33	15.94	13.06	21.23	35.02	35.47	38.95	17.93	15.66	42.68	32.01	60.44	42.1	43.94	28.9	60.85	13.41
cds227	0	0	0.85	0	2.01	0	0.93	0	0	1.41	0	0	0	0	0.46	0.56	0.25	0	0.14	1.06	2.98	2.63	1.01	0.5	1.66	0	0	0	0.5	0	0	0	0.5	0	0.19	0.16	0	0	1.15	1.93	0	1.24	0	0.84	0	1.46	0.75	1.73	1
cds228	0	0	0	0	0	0	0	0	0	0	0	0	0	0	0	0	0	0	0	0	0	0	0	0	0	0	0	0	0	0	0	0	0.25	0	0	0	0	0	0	0	0	0	0	0	0	0	0	0	0
cds229	21.24	11.65	21.53	2.59	46.19	24.09	24.98	8	52.78	30.4	24.2	0	26.08	18.76	14.44	7.81	15.71	13.25	14.32	24.58	28.33	22.77	47.09	31.78	41.7	26.87	24.21	23.11	15.5	7.41	19.25	7.54	35.9	5.46	16.46	23	48.57	34.66	38.91	26.44	29.49	37.98	42.71	77.53	58.34	41.34	27.34	72.39	33.81
cds23	49.83	43.7	37.21	20.03	86.93	67.57	65.69	15.97	59.62	56.48	68.93	5.08	44.94	46.71	25.33	26.3	26.09	21.95	46.01	35.26	57.48	57.61	72.47	28.34	65.72	32.53	53.06	32.57	38.57	12	33.67	16.28	64.85	22.37	32.38	27.33	84.49	40.13	89.82	41.62	34.12	49.08	58.87	117.85	81.69	77.62	42.73	154.62	35.47
cds230	2.8	5.08	2.56	3.01	7.04	3.36	0.48	0.26	2.8	4.89	2.47	0.49	5.14	2.4	0.86	1.03	1.98	2.39	3.02	4.62	7.81	3.53	5.46	0.84	3.28	4.7	3.08	4.11	4.68	1.13	3.66	1.16	6.08	4.08	2.51	1.16	2.1	2.97	8.96	3.9	4.24	3.74	7.41	14.94	9.29	8.97	1.49	10.1	4.34
cds231	30.39	10.84	29.21	10.28	58.02	39.67	35.3	2.39	38.4	30.86	33.34	3.62	34.72	25.52	10.92	11.11	15.39	10.48	24.55	13.57	25.08	22.44	51.24	15.52	35.6	23.54	34.5	21.08	19.93	11.04	15.59	11.88	34.99	14.12	25.07	22.86	51.36	30.03	50	17.31	17.12	32.42	35.57	67.31	48.56	53.78	30.82	82.24	33.5
cds232	5.17	6.48	8.47	7	13.55	7.24	4.94	11.96	5.72	8.38	14.06	2	13.15	6.2	1.76	2.44	1.5	1.31	5.32	2.43	10.68	4.58	16.34	7.25	6.46	4.76	8.54	2.74	3.16	3.04	4.59	3.37	13.01	3.82	8.08	3.03	17.73	8.82	19.77	6.61	4.66	8.34	9.64	20.55	17.09	14.2	8.12	18.2	9.28
cds233	5.84	11.32	5.12	5	21.78	9.34	11.17	1.02	8.79	5.67	12.73	2	15.1	9.44	3.67	3.36	3.14	1	8.87	2.42	12.59	2.8	11.88	3.23	18.98	6.43	11.69	7.35	6.22	3.17	6.74	5	7.87	8.05	9.5	4.85	18.53	4.19	16.87	3.65	5.96	11.64	12.72	20.06	18.33	8.77	8.39	27.89	8.21
cds234	11.06	3.79	5.54	2.31	10.75	11.75	15.73	2.79	17.92	8.53	17.28	0	9.97	7.33	9.08	3	3.64	3.16	6.93	4.32	19.37	10.28	13.19	8.44	11.72	7.58	15.76	8.53	12.16	5.49	10.68	1	13.35	8.36	9.37	3.61	26.73	15.24	12.1	5.2	4.76	8.39	18.25	23.67	18.35	19.49	13.39	22.08	10.13
cds235	3.05	2.1	2.55	1.69	1.38	2.8	6.01	0	0.86	2	5.69	0	0.19	1.73	2.44	2.74	2.57	1	1.64	2.12	2.63	1.67	6.49	0.84	3.2	3.74	1.96	2.33	1.57	0.47	2.04	0.43	4.16	2.51	0.62	0.99	5.36	3.18	2.05	2.04	2	0.86	2.57	9.35	6.25	4.37	2.99	7.19	3.17
cds236	1.28	0.07	1.45	0.17	1.58	1.45	1.52	0	0.62	0	0.07	0	1.89	1.26	0	0.56	0.3	0	1.79	1.02	0	0.1	2.83	0.19	0.23	0.46	2.78	1.09	0.67	0.24	0.14	0	0.38	1.67	1	0.78	0.69	1.19	2.5	1.11	0.98	0.44	1.04	6.8	3.97	0.7	1.26	2.8	0.15
cds237	7.19	3.35	3.84	4.53	9.42	11.06	6.3	1.48	7.83	9.26	6.6	0.68	4.33	6.12	4.15	3.47	3.01	3.58	3.62	7.68	4.97	3.7	7.42	2.87	2.57	3.16	6.21	7.71	5.2	0.24	2	4.58	4.8	5.16	3.19	4.04	9.5	2.17	8.93	1.23	1.91	1.2	14.55	9.78	8.74	7.23	4.51	12.73	3.38
cds238	56.63	46.63	86.25	25.85	162.08	76.23	74.96	19.97	121.83	83.15	108.78	13	103.24	105.62	60.64	44.96	55.72	27.53	78.04	69.95	91.04	61.92	129.48	35.38	103.83	71.43	131.52	66.91	77.54	32.09	60.43	45.32	136.16	43.43	62.98	65.41	166.59	80.3	167.3	64.24	54.31	106.1	156.22	263.14	187.66	172.02	73.89	291.15	71.84
cds239	0.26	0	2.18	0	0	0.78	3.43	0	0.68	0.42	1.1	0	0.9	0.8	0	0	0.48	0.88	1.5	2.54	2.87	1.17	1.31	0	0.85	0	0.87	1.42	2.34	0.45	0.14	0.69	3.04	0	0	0	3.13	1.35	1.49	0.81	1.7	2.07	0.1	2.33	2.27	1.01	1.23	1.66	2.38
cds24	118.08	93.16	93.21	48	201.86	131.07	135.89	60.3	241.1	141.55	214.44	21.56	215.08	154.78	74.1	56.31	79.03	53.65	138.71	102.27	150.49	113.04	239.17	73.5	173.01	133.1	158.92	100.19	102.67	49.69	99.15	81.33	213.28	68.04	104.66	96.75	241.56	123.3	204.97	117.06	108.44	202.06	196.52	342.76	263.9	252.39	137.12	386.94	149.09
cds240	0	0	0	0	0	0	0	0	0	0	0	0	0	0	0.97	0	0	0	0	0	0	0	0	0	0	0	0	0	0.41	0	0	0.43	0	0	0	0	0	0	0.69	0	0	0	0	0.19	0	0	0	0	0
cds241	0	0	2	0	0	0	0	0	1	0	1.59	0	3	1	0	0.5	0	0	0	0	0	0	0	0	1	1	2	0	1	0	3	0	0	0	2	0	0	0	2	0	0	0	1	1.8	1	0	2	4.4	1
cds242	0	0	1.53	0	0	0	0	0	0	0	0.36	0	0	0	0.5	0.89	0	0	0	0	0	0	0	0	0	0	0	0	0	0	0	0	0	0	0	0	1	0	0	0	0	0	0	0.11	0	0	0	0.53	0
cds243	3.2	1	3.09	1	4.99	1	2	0	3	2	9.98	0	2	1	2	0	2	2.5	2.5	1	2	2	7.07	1	7	0.5	8	2	2	2.5	2.9	2	2	2	5	2	13.5	5	8	1	2.48	0.03	1	9.49	8.96	7	2	10.86	3
cds244	0.73	0	0	0	2	0	0	0	0	0	1.01	0	0	1.23	0	0	0	0	0	0	0.61	0	1.91	0	0	0.19	0.89	0	0	0	0.59	0	0	0	0	0	0	0	1	0	0.99	0	0	0.36	0.53	0	0	2.12	0
cds245	73.53	61.66	119.6	49.9	70.49	60.48	94.63	13.32	145.65	97.64	146.82	17.09	102.25	87.61	21.79	16.02	23.74	18.54	119.04	67.94	148.07	77.56	213.3	62.16	187.35	94.14	185.52	89.84	72.9	41.92	100.76	58.06	183.74	79.87	103.58	88.4	330.41	155.46	230.6	138.88	108.51	170.72	207.23	392.53	307.28	253.01	128.11	539.68	167.65
cds246	73	58.76	78.43	35.37	172.51	103.07	91.53	17.74	109.38	102.28	143.65	14.75	103.5	98.83	66.84	35.05	38.35	24.81	100.15	85.81	137.13	89.44	159.53	44.53	121.11	60.98	120.77	65.15	67.94	26.59	76.95	48.57	146	58.93	76.82	65.21	168.88	94.61	190.75	81.54	87.42	181.85	174	297.07	179.73	182.91	112.47	290.03	110.88
cds247	33.62	22.05	23.19	19.33	70.5	43.96	35.47	16.09	50.56	33.18	37.92	8.86	35.38	37.76	26.74	22.16	15.03	10.89	24.41	30.08	39.19	33.06	55.98	20.43	49.03	31.92	34.86	29.66	24.23	6.77	17.97	11.99	41.05	15.27	23.75	21.68	61.25	33.68	46.7	29.35	29.97	56.45	54.93	77.68	47.69	55.71	31.02	103.36	36.58
cds248	9.13	4	5.16	1.5	8.49	9.19	9.72	0	13.64	9.87	6	0	2	8	1	4.92	5.5	2	6	4	11	5.99	11.77	6.5	17.5	5.3	6.5	0	10	2	11.03	4	11.54	8	10.59	11.12	12.44	11.5	9.5	9	8.28	16.78	10.02	21.98	14.38	10.7	16.16	41.48	9.56
cds249	2.5	2.94	1.74	1	6	0	3	0	2.61	3	2	0	1.69	1	2	0.21	1	0.63	0.9	4.93	3	1	1.5	1	6	4.68	4.22	2	1	0	0.78	3	3.82	1.25	4	1.38	8.79	0.94	4.43	0.5	1	0	1.25	7.66	4.12	2.52	1.64	9.74	0.97
cds25	278.74	214.03	262.52	160.74	408.19	271.4	334.55	90.64	398.18	337.31	444.52	32.45	355.52	283.4	128.51	84.76	147.06	89.46	237.43	193.25	319.7	276.46	491.56	169.51	396.71	230.78	331.97	205.88	238.05	104.63	189.15	122.15	427.75	158	225.19	224.9	616.44	336.92	519.25	250.72	219.32	337.52	451.64	695.02	556.51	507.67	320.31	908.36	271.3
cds250	3.94	5	3.32	1	1.75	2	2.36	6.26	3.09	4.08	5.37	1.6	4.67	4.03	3.33	2	1	0.69	4.73	4.66	11.87	4.39	13.68	1.77	3.98	3.92	9.24	6.92	1.19	1.2	1.5	2	7.31	3.89	4	2.77	8.27	6.16	8.98	4.9	6.37	9.74	8.38	17.34	14.54	12.15	7.31	26.82	4.55
cds251	0	0	1	0	1.45	0	0	0.58	2	0.15	2.12	0.33	0.19	0.14	0.48	1	0	0	0.5	0.58	1	0	2.92	0	2	3	1.34	0.95	1	0	0	0	1.28	0	1.49	0	0.6	0.86	0.7	0	0	0.74	2.43	0.92	0.12	4	0	5.41	0.36
cds252	0	1	2.79	0	0	0	1.72	0	3	0	0	0	0	0	0	0	1	0	1.5	0	4	2	0	0	1.5	1	1.34	0	0.69	1	3	1	0	0	2	0.02	2	3	5.21	0	1	1	1	0	2.96	1	2	5.52	0
cds253	0.81	0	0.56	0	0	0	0	0	0	0.68	2.39	0	1	0.5	0.66	0.67	0	0	1.09	0.97	1.66	0	0	0	0	0	0.38	0	0	0.63	0	0	0	0	0	0.35	1.62	1.45	0.9	0.72	0.42	0	0.5	1.52	2.59	0	0	1.42	0.82
cds254	8.45	7.54	9.7	15.28	19.11	11.36	12.69	2.08	11.59	13.21	14.34	0	10.49	13.06	6.86	7.98	6.72	5.35	9.91	9.96	13.67	15.43	33.94	2.19	22.09	16.69	20.68	7.7	13.86	1.94	10.36	5.95	20.06	6	6.59	6.6	26.39	14.11	21.26	8.8	8.65	11.72	24.83	32.09	27.14	18.44	15.67	45.74	6.08
cds255	0	1	1	0	1	0.76	4	0	1.75	1	0.16	0	0.5	0	0	0	0	0	2.44	0	2.61	0	2	1	0.92	1.34	0	0.18	0	0	0	1	0.47	1	0	2	0.66	1.93	0	0.54	3.05	4.64	0.99	3	5.01	0	0	3.85	0.57
cds256	0	0	0.04	0	0.5	0.21	2	0	1.23	1	2.28	0	0.58	2.92	0	2.79	0	0	1	0	0.35	0	0.81	0	0.97	0.65	0	1.67	0	1.01	1	0	0	0.73	0	1	0	1.08	4.86	0	0.46	0	2.86	0.27	0.94	1	0	5.13	1.82
cds257	0	0.5	4.42	0	1.3	1	0.59	0	0.68	0	4	0	0.86	2.47	0	0.11	0.14	0	0.22	0	0.57	0.42	1.87	0	0.19	1.25	2.11	1.02	0	0.92	0.9	0.99	2.15	2.38	0.7	1	2.63	1.62	4.64	1.68	0.39	1.76	2.61	1.14	5.96	2.49	3.19	3.68	1.4
cds258	0	0	4.32	1	0.68	0	0.39	0	2.54	1	2.14	0	1.97	3.69	0	0	1.77	0	1.76	0	5.45	0.57	2.21	0	2.3	2.08	1.82	2	0.14	0.83	1	0.99	3	1.96	1.27	0	2.25	1.38	1.87	0.75	1.59	1	0.41	3.07	2.05	0.42	0.79	3.26	0.81
cds259	1	0	0.03	0	0	0	0	3	0.71	0	1.73	0	0.42	1.27	0	0	1.62	0	0	0	1.16	0	1	0.98	0	1	0.01	0	0.34	0.2	0	0	0.77	1.75	0	2.38	2.1	0.3	0.32	1.53	0	0.21	0	1.46	0.42	1.55	0	3.92	1.89
cds26	17.81	11.91	9.04	10.04	26.37	19.27	27.47	6.36	22.82	33.12	33.73	0.74	23.66	18.13	12.72	12.82	10.71	8.62	17.3	13.46	25.72	28.94	37.12	13.81	15.92	14.33	24.38	17.31	13.28	6.06	13.79	6.7	35.08	11.27	19.28	19.4	36.98	29.96	40.79	21.24	18.53	33.66	30.18	42.41	35.45	35.21	15.04	70.16	28.13
cds260	1	0	2.83	2	3	5.11	5	2	0	0	0.54	2	0	2.03	0	0.05	0.42	0	0.8	0	4.08	0	1	1.2	3.5	1	1.5	0	1	0.94	2.03	0.81	0	0	0.09	1.6	3.69	2.32	3.6	1	1	0	2.22	3.9	3.97	1.66	2.5	11.9	4.32
cds261	3	4	4.47	0	8.5	21.62	6.03	0	4.58	3	9.95	0	2	2.96	1	4.95	0	0	9.7	6.5	5.13	4	10.55	6.81	4	5.28	3.5	3.36	1.5	2	8.96	2.18	4.39	0	3.9	1.46	9.64	7.17	11.58	3.81	3.98	7	6.78	12.91	13.03	2.78	4	12.66	2.61
cds262	0	0.05	1.58	0	0.98	2.77	2.92	0	0	1.74	3.35	0	2.84	0	2.45	1	1	0	3.23	0	5.46	1.56	8.89	0.52	7.48	1.6	6.79	2.84	3	1.94	2.66	1.27	4.85	6.09	3	1.54	2.7	0.14	4.24	2.83	0.52	1	0.93	4.54	2.6	3.38	3.32	9.97	3.71
cds263	0	0.04	2.68	0	1.47	0	1.98	0	0.21	1	1.93	0	2	0	0	1	0.34	0	0.04	0	0.69	0	0.75	0	0	0.25	0	2	3	1	0	0	1.67	0.5	0	1	3.5	1.48	0.91	0	0	0.94	0	0.39	3.74	2.72	2.5	2.32	1
cds264	0	1.84	1.3	0	1.02	0	0	0	0	1	1.73	0	0	0	0	1	1.31	2	0.89	0	2.53	0	0	0	0	0	0.24	1	0	0	0	0	1.4	0	0	0	1.88	0.63	0.92	0	0	0	0	0.83	1.43	1	0.06	3.1	0.32
cds265	1.97	0	2.46	0	7.41	9	5	0	2	2	5.15	0	2	3.8	0	1	1	2	3.35	0	3.5	0	5.5	1	2	2.5	2.26	1	1	1	2.45	2	8.94	1	2.81	1.36	4.11	8.71	6.2	1	0.63	1	4	11.63	4.52	10	2.42	16.25	13.17
cds266	2.42	4	0.27	0	1	0.59	4	0	2.55	4.31	8.61	1	12.6	7.11	4.89	5.56	1	1	7.7	3.79	5.18	12.66	9.94	1.42	6.63	4.46	14.39	5.17	6.57	3.54	7.36	0	11.39	1.65	10.54	5.5	12.17	4.19	5.85	8.19	3.56	6.46	7.4	15.1	9.2	11.9	5.53	14.42	7.31
cds267	231.15	220.33	256.97	124.96	333.46	311.37	280.72	85.67	427.29	357.13	565.1	43.04	358.56	325.14	142.2	113.95	142.88	106.16	354.16	296.59	467.44	298.66	690.53	205.97	528.24	363.13	630.92	321.59	342.25	161.16	365.78	188.77	656.51	258.4	369.01	353.81	1106.93	571.75	947.59	493.41	441.42	746.82	882.14	1641.06	1295.64	1026.93	567.89	2046.84	631.94
cds268	410.95	325.26	440.59	161.47	642.14	481.07	465.91	128.89	779.87	749.9	1019.81	98.01	669.42	630.81	278.6	262	252.12	174.47	808.25	429.42	961.33	427.35	1440.16	366.93	961.86	633.07	1470.62	693.57	866.64	375.67	847.6	518.29	1471.65	577.83	900.82	787.2	2562.87	1217.12	1780.5	998.43	915.08	1403.48	1548.13	3576.07	2796.05	2551.73	1269.19	4910.57	1668.48
cds269	56.86	42	54.9	27.35	97.23	45.85	72.35	13	98.78	67.72	92.5	6	66.43	52.16	12.5	21.95	19.5	16.5	62.02	39.68	74.27	66.84	86.84	44.63	103.75	64.45	88.26	48	51.55	28.49	58.49	23.94	103.17	22.94	43.5	40.82	119.14	66.09	106.3	74.79	54.85	83.56	100.48	175.76	157.81	127.7	66.37	199.61	77.58
cds27	7.47	5.87	21.28	8	32.79	15.08	8.72	3	18.76	17.1	21.1	0	13.91	6.85	2.35	4	4	3.16	12.99	7.58	17.68	12.65	29	18.18	29.29	18.59	12.42	10.25	7.07	2.15	13.1	4.09	23.84	8.07	7.82	10.16	24.62	7.27	19.14	14.66	9.45	20.03	17.27	17.29	30.8	14.9	18.62	24.39	12.63
cds270	1.36	0	0	0	0	0	0	0	0.72	0.11	0	0	0.16	0	0	0.35	0	0	0.5	0	0	1	0	0	0	0	1	0	1	0	0.24	0.94	0	0	0.01	0	0.06	0.5	0	0	0	0	1.73	1.1	0.45	0	0	0.84	0.6
cds271	1.77	0	0.95	0	2	0	1	0	0	2	1	0	1	0	0	0	0	0	0	1	1.53	0	0	0.22	1.78	1	1	1	0	0	0	2	2	1	0	2.45	1.5	0	0.5	1	2	2	4.18	5	4.29	7	1	3	1.58
cds272	135.7	108.65	145.17	39.7	343.8	211.55	215.37	59.48	292.09	206.05	335.15	34.29	297.31	230.25	162.96	113.43	130.62	88.13	201.98	135.43	267.03	175.79	375.73	88.39	255.27	173.52	260.49	150.21	178.63	76.51	175.15	97.05	343.43	135.22	181.11	151.88	343	214.24	354.62	185.91	179.05	371.19	290.14	613.35	401.88	335.52	200.29	604.24	261.84
cds273	1	2.38	2.04	0	0	0	0	0	2.39	1.81	1.27	0	1.82	0	0	0	0.54	0	0	0	1.44	0.69	1.79	1.07	1	0	0	0	1	0	1.04	0.96	0	2	0.17	0	1	2	1	0	0	0.16	1	0.93	0.51	0.49	0.71	3.6	0
cds274	1	0	0	0	1	5.77	0	0	1	2.49	2.89	0	0.2	3	1.5	0.93	0.83	0	0	0	2.01	0.77	1	1.58	2.2	3.27	0.32	2	0.46	0	3.21	1	0	0.49	1.3	1.99	2	2.23	1	0.94	0.19	4.9	5.97	3.9	2.45	1.38	3.85	1.87	1.23
cds275	0.1	0	0	0	0	0.65	0.04	0.49	0	0	0.02	0	0.03	0	0.04	0	0	0	0	0.57	0	0	0	0.53	0	0.3	0.71	0.45	0	0	0.68	0	0	0	0	0	0.7	0.05	0	0.59	0.03	0.02	1.78	0.32	0.06	0.85	0.57	0	0.02
cds276	250.14	195.8	302.19	83.58	535.77	251.14	310.2	57.03	364.22	247.25	370.75	20.3	269.42	204.78	131.54	93.52	118.51	82.79	256.8	222.5	318.32	204.8	444.74	201.09	410.96	216.26	316.88	171.35	233.39	111.33	182.35	113.16	356.97	139.24	188.25	153.31	469.88	251.26	431.69	233.19	213.57	367.22	394.36	645.89	545.74	394.59	227.36	653.76	199.88
cds277	385.08	315.28	306.51	159.97	620.68	489.09	422.84	115.14	559.46	432.9	557.47	63.1	425.37	392.83	188.13	145.77	248.35	110.27	342.05	266.4	446.15	392.23	707.81	192.14	520.33	297.73	519.34	246.53	363.04	111.71	333.88	180.54	590.98	187.31	304.37	269.34	897.11	454.17	704.09	394.43	358.87	594.15	547.91	989.1	598.74	697.32	446.64	1376.73	408.21
cds278	99.69	64.09	80.7	47.66	121.24	111.29	123.68	24.1	121.4	144.33	129.9	30.32	91.37	100.27	53.79	35.11	74.12	47.97	89.45	72.48	100.56	85.24	209.69	47.36	119.39	83.89	139.67	65.49	61.19	31.09	62.34	37.2	166.52	40.89	84.43	82.37	166.02	120.18	195.61	94.27	85.63	129.65	115.75	211.77	141.97	164.94	124.63	307.11	76.95
cds279	20.34	14.78	15.94	3.15	20.52	14.99	22.02	2.09	23.2	12.53	22.69	2.54	13.59	6.18	6.13	4.79	7.62	5.4	13.01	10.91	21.3	6.23	25.51	6.35	23.64	14.62	19.21	9.08	10.36	4.41	8.36	6.2	22.79	9.12	14.56	16.13	21.74	12.11	24.8	21.93	11.76	20.57	26.58	40.81	38.81	20.56	15.16	48.47	19.26
cds28	25.15	10.73	29.38	5.76	26.79	23.44	21.89	9	34.7	54.21	91.88	2	156.37	82.66	28.42	21.24	14.27	14.19	77.08	51.55	107.89	71.97	156.81	45.93	83.73	55.58	101.17	84.25	68.93	12.61	72.57	44.7	132.32	54.08	56.52	50.11	105.34	72.47	105.81	58.05	62.82	100.6	99.82	152.9	96.8	117.79	76.15	204.74	103.75
cds280	65.12	50.46	71.65	35.41	135.86	114.43	77.16	21.98	91.37	85.14	96.28	17.11	81.35	67	34.67	39.24	36.93	20.13	68.3	56.53	77.72	55.05	160.75	49.51	112.32	87.48	81.87	69.33	65.2	30.05	50.64	35.35	86.36	44.59	59	53.81	138.83	79.09	136.27	58.24	60.52	84.65	146.65	216.91	144.72	115.48	110.04	209.13	71.57
cds281	2261.17	1295.56	2847.66	950.11	3443.8	2224.62	3298.65	883.48	3819.91	2699.06	4159.05	287.26	2290.13	1709.87	1246.47	739	1430.86	696.74	1646.16	705.7	2030.05	836.28	3458.59	887.57	2028.91	1123.11	2583.45	980.27	1602.09	686.37	1532.08	651.28	2489.07	700.05	1398.8	1013.05	3691.22	1279.9	2565.3	694.83	680.54	834.86	1733.13	3490.58	2230.1	2570.72	1083.5	4208.01	836.92
cds282	647.52	460.33	760.75	340.24	1310.32	994.24	908.52	282.21	1143.43	930.49	1081.75	107.57	659.74	671.32	286.95	257.13	368.6	233.83	579.73	387.48	637.38	441.5	929.97	288.46	563.76	398.32	747.89	344.73	498.67	192.76	381.48	233.81	668.91	265.35	367.93	322.61	963.86	452.82	834.73	299.97	292.01	525.3	763.39	1139.95	765.75	760.18	366.03	1286.31	350.55
cds283	32.91	28.81	35.96	7.68	39.75	28.68	41.19	16.78	49.85	40.07	39.62	3.52	29.31	25.04	6.65	10.7	11.7	4.62	24.43	30.48	30.07	23.05	64.9	19.65	43.62	25.86	39.76	22.04	30.36	13.97	20.94	13.01	34.66	11.23	21.35	26.41	62.03	23.07	54.31	22.84	21.83	45.22	53.13	77.55	60.68	49.55	20.77	99.12	43.44
cds284	76.84	63.21	72.56	20	139.48	96.8	105.26	26.21	173.72	145.29	146.63	15	127.51	110.57	40.72	40.04	51.85	22.64	102.53	62.43	127.57	83.38	185.82	49.79	132.06	102.25	141.99	65.97	88.84	44.23	71.42	31.28	151.41	60.23	84.83	88.38	239.29	146.38	199.73	116.54	91.45	163.85	167.53	308.46	225.01	202.4	106.5	374.96	122.53
cds285	0	0	0.67	1	0	2	1	0	0.42	0	0	0	0	0	0	0	0	0	0	0	0.84	0	1	0.27	0	0.86	0	0	0	0.33	1.2	0	1.54	0	0.5	0	0	0	0.6	0	0	2.27	0	0	0	0	0	0.32	1.42
cds286	1	1	0.61	0	2.5	1.58	1	0	1.43	0.87	1.41	0	0	0	0	0	0.05	0.86	0.19	0	1.95	0.09	0	1.7	1	0	0.02	5	0	1	0.35	0	0.87	0	1	1.85	1	0	0.38	0	1	0.42	0	0	0	0	1	1.64	0.72
cds287	21.52	12	8.84	4.8	35.09	17.43	18.1	3.33	10.32	11.24	11.25	2.41	12.91	13.44	8.17	10.99	10.4	4.39	11.73	4.05	9.35	6.44	21.79	7.07	12.93	11.74	15.35	11.81	7.27	5.78	8.91	4.42	23.55	8.04	12.36	12.73	29.16	18.26	26.68	16.29	4.97	28.74	13.16	35.71	31.75	27.14	14.4	39.56	23.32
cds288	41.92	27.83	45.23	12.83	55.72	61.29	40.23	16.03	38.04	43.71	43.98	9	34.57	28.49	17.98	13.78	17.84	5.61	37.15	20.72	48.19	23.52	72.9	18.6	52.27	30.06	50.74	27.89	25.18	14.62	21.17	13.27	44.62	22.8	31.9	27.59	66.49	39.88	74.6	34.25	32.51	42.1	46.03	110.76	75.85	65.14	36.59	120.14	43.07
cds289	58.08	51.64	54.16	27.63	82.36	61.3	56.87	11.06	78.94	68	82.62	11.52	64.44	62.25	21.59	17.92	36.32	21.72	55.34	51.03	61.98	72.35	121.55	26.58	84.4	70.08	76.36	48.17	64.57	15.21	45.47	29.84	91.5	36.31	35.14	50.36	135.98	77.2	105.41	56.67	59.25	101.66	79	128.69	132.55	108.25	73.78	163.2	43.09
cds29	6	0.56	7	4.09	8	2	4.25	0	1.5	7.79	17.95	0	7.92	12.85	8.99	7.93	2	2.61	9.26	6.4	6.99	9.03	10.76	4.59	12.54	11.72	5.5	10.4	4.63	3.5	5	4.2	12.33	3.95	9.89	5.56	18.4	11.89	13.5	14.01	12.49	18.34	7.92	33.03	10.42	12.01	14.11	28.9	12.93
cds290	361.19	298.91	343.75	156.37	529.77	444.96	465.39	116.51	625.32	495.87	673.4	56.27	574.65	425.7	215.07	202.83	232.01	138.24	433.72	295.28	532.74	377.59	836.89	258.14	600.5	388.49	546.32	346.29	348.73	130.69	370.21	200.51	662.04	253.05	346.65	325.16	854.71	488.23	679.47	337.39	318.56	579.41	629.67	1142.85	859.74	679.99	461.47	1298.75	414.33
cds291	371.98	236.33	298.02	151.67	617.62	512.53	407.78	121.66	528.29	443.75	614.43	53.34	534.2	432.12	192.74	179.75	215.67	117.66	366.88	289.69	441.85	408.99	723.94	206.84	548.17	339.19	520.05	318.78	322.85	152.7	309.89	210.51	577.22	247.03	313.34	270.32	727.84	409.23	671.72	306.77	300.27	505.16	536.73	976.07	673.25	709.33	439.23	1197.94	362.23
cds292	133.25	94.03	130.92	50.41	211.45	190.52	182.45	54.31	214.81	199.28	232.61	18.67	214.38	203.51	78.25	68.05	63.17	52.5	171.87	129.43	194.04	160.49	321.05	94.81	223.27	154.22	215.58	124.01	146.48	59.29	152.95	86.85	244.3	110.25	141.7	129.88	283.01	204.52	262.61	158.23	134.73	247.75	253.11	413.37	362.87	285.76	172.66	480.25	194.87
cds293	209.22	172.28	275.65	83.64	428.88	301.28	333.87	86.3	417.88	344.97	501.05	54.09	496.84	383.82	176.85	149.08	167.06	121.25	302.83	233.75	440.48	288.73	642.59	200.49	494.29	321.75	441.24	269.59	287.53	144.91	279.28	162.69	547.32	218.48	281.4	227.85	584.77	366.16	525.97	226.19	242.81	462.86	527.71	849.35	656.93	609.96	355.47	927.14	326.83
cds294	15.82	22.77	15.35	11.45	26.87	20.91	17.34	11.87	27.71	14.38	24.44	1	23.25	10.16	2.39	2.47	4.91	3.07	16	13.9	36.22	13.83	37.26	21.38	27.22	21.49	20.27	21.27	9.73	4.46	12.64	5.86	32.19	14.25	13.05	15.08	44.25	27.36	30.56	23.08	15.35	28.58	33.91	50.5	44.82	32.66	24.61	58.52	27.54
cds295	47.41	28.29	40.46	20.58	93.35	77.96	49.97	9.87	54.97	58.99	45.64	2	39.21	24.98	20.56	13.16	16.76	12.87	33.26	44.45	45.34	48.48	69.66	32.13	57.05	46.96	47.3	34.67	24.64	7.5	18.35	12.51	55.79	30.01	28.93	30.91	57.39	32.77	78.57	37.79	21.89	50.69	51.78	102.35	88.47	56.99	48.96	102.27	34.13
cds296	6	10	2	10.5	7.29	6.77	8	2	8.62	9.74	6.58	0	5.23	4.17	2	0	3	2	11.5	6.43	14.78	7.99	14.76	3	13.82	8.74	5.51	2.61	4.19	3	2.99	1	6.01	5.65	5	4.3	15.55	8.89	14.72	11	8	12.39	9.44	19.89	19.8	13.5	9	25	10.59
cds297	12.02	4.61	5.75	6.06	13.99	15.57	12.62	4	22.77	24.45	50.96	5.19	51.91	58.23	35.76	39.65	2.74	8.59	52.17	44.32	87.19	58.96	115.56	32.63	58.42	60.43	57.75	60.62	38.6	18.63	58.7	31.63	141.87	61.88	63.06	44.84	69.69	58.14	94.42	72.64	53.07	113.4	61.94	115.06	100.88	99.62	61.4	227.38	87.84
cds298	104.35	79.74	94.41	59	115.43	94.88	112.03	34.86	159.4	122.42	168.21	18	155.16	113.49	38.68	39.75	60.58	32.62	117.45	86.28	125.64	84.94	180.32	88.58	150.34	110.45	129.07	88.72	78.32	36.25	80.23	55.5	163.65	65.33	83.77	88.64	259.24	138.48	185.94	98.83	113.23	170.62	167.06	337.42	221.81	193.46	120.29	375.66	137.27
cds299	0	0.38	3.96	2.39	5.13	0.48	5.88	0	2.38	3.64	6.94	0	5.31	2.26	4	3.88	1	3.03	4.07	3.88	5.67	0.89	12.56	4.07	7.65	2.04	4.63	3.66	7.01	2.04	4.82	1.17	1.5	0.97	4.84	5.12	7.22	5.5	7.54	1.85	6.46	2.86	7.78	8.62	9.6	6.49	7.24	15.52	2.58
cds3	99.16	86.39	111.52	46.52	218.67	147.57	149.1	33.62	149.79	165.76	198.89	15.37	158.66	139.14	53.92	60.17	52.35	37.63	114.15	106.08	142.53	97.58	239.53	63.88	197.85	109.37	156.42	103.69	111.1	38.74	82.26	49.72	170.9	77.75	90.73	102.85	195.86	136.68	239.41	93.25	103.72	213.54	258.24	352.34	265.86	200.75	126.25	373.2	123.6
cds30	80.23	63.24	76.22	28.44	119.69	76.68	80.8	27.39	93.82	89.89	123.56	9.25	85.76	73.32	34.57	33.58	49.74	22.44	62.99	67.41	73.67	75.76	141.62	39.51	92.01	63.7	80.51	35.93	51.2	21.73	50.93	27.59	107.41	29.99	47.6	46.8	129.37	67.08	107.7	53.67	38.58	88.37	97.46	187.97	127.37	104.32	60.32	197.81	57.01
cds300	1.76	0.56	3.16	1.49	0.66	3.7	1.62	0	4.13	0.27	3.95	0	1.25	3.43	0.93	0.56	0.4	0.59	1.78	1.79	3.62	2.66	8.04	1.08	6.18	3.82	3.84	1.1	3.32	0.52	0.88	1.93	3.34	2.2	3.87	1.7	2.06	2.75	6.69	0.89	3.32	5.01	2.84	4.88	3.94	1.91	1.2	7.47	2.64
cds301	0	0.36	2.63	1	0.74	0	2.89	1	1	2	1.09	0	0.98	1	0.38	0	0.53	0	3.1	0.73	1.5	0	3.61	1	5.83	2.51	3.81	0	0.94	0	6.81	1	5	0	6.67	2.73	1.79	1.14	3.15	0.67	2.08	0.78	1	5.99	4.08	3.4	0	4.54	5.43
cds302	0	1.05	0.66	0	1	0	2.33	0	0	0.81	2.06	0	0	0.65	0	0	0	0	0	1.01	0.37	2.8	0	0.89	1.6	2	0.45	0.85	2.43	0	0	0	1.06	0.67	0.18	1.49	0.75	0	2	0	0	2.52	2.03	2	1.97	1	0	1.58	0
cds303	0	0.17	1	0	0	0	0.03	0	0	0	0	0	0	0	0	0	0.64	0	0.27	1.11	0.55	0.75	1.16	1	0.57	1	0.36	0.56	0.32	0	0	1	0.18	0	0	1.76	0.15	0	0.91	0.78	0	0.23	0.65	1	0.76	0.37	0	0.12	0
cds304	0	0.59	0	0	0	0	0.77	0	0	0	0.23	0	0	0	0	0	1.02	0	1.3	0.43	0.45	0.18	0.26	0	0.33	0	1.93	0.34	1.24	0	0	0	0.88	0	0	0.15	0.64	0	0.43	1.29	0	1.43	1.03	0.38	2.04	1.56	0	0.49	0
cds305	112.53	106.1	90.41	53.6	233.58	159.98	152.94	38.34	150.96	146.68	151.06	19.61	111.19	118.25	54.53	43.91	60.45	49.96	99.71	95.44	124.81	107.86	179.45	72.82	155.72	109.93	125.7	79.13	107.93	41.4	75.2	55.34	164.61	57.46	66.43	96.66	197.17	133.28	235.78	88.14	101.2	217.15	182	296.15	203.79	173.47	131.16	278.88	136.25
cds306	11.03	5	12.82	0	17.03	9.46	14.44	1.19	29.82	48.81	191.7	12	284.81	245.83	286.85	298.58	68	37.63	365.58	226.32	706.94	281.44	1061.96	184.87	557.34	321.43	465.83	319.68	454.28	193.29	780.31	404.66	1375.49	542.32	454.53	373.13	660.78	403.63	401.55	269.43	250.9	419.2	348.81	573.57	448.17	640.95	469.46	1298.28	480.05
cds307	56.48	43.92	41.89	28.41	118.94	77.39	72.06	26.94	67.23	57.07	83.8	6.76	66.37	58.03	42.8	32.05	49.62	21.42	45.38	32.38	56.11	43.31	91.48	23.98	86.66	40.2	48.6	36.3	35.47	20.46	34.59	17.27	72.63	26	39.6	22.5	90.89	38.22	70.54	24.7	28.81	49.8	68.28	100.91	87.16	86.31	36.66	120.84	26.2
cds308	77.3	46.34	66.19	21.79	175.1	68.89	77.34	20.85	125.94	65.75	128.86	9.57	101.67	63.43	42.91	33.4	59.33	27.33	84.17	38.08	119.68	54.01	127.14	47.47	123.75	38.49	75.5	51.86	57.16	24.69	69.65	30.9	98.63	34.49	57.07	58.32	168.99	61.12	142.54	52.98	47.93	76.42	102.75	174.81	131.17	129.25	68.69	254.76	84.89
cds309	92.69	55.1	72.96	33.14	73.73	85.29	57.74	20.6	178.32	193.22	317.28	25.81	428.98	303.31	69.73	76.09	49.63	32.53	195.96	108.86	277.89	118.08	522.14	118.09	307.29	198.2	369.85	201.15	203.87	84.13	289.14	137.77	437.07	154.64	181.12	180.98	561.2	286.84	378.69	169.51	142.52	254.77	292.55	581.2	371.9	432.16	340.92	917.41	243.16
cds31	14.38	15.95	20.99	14.76	41.37	21.84	18.11	12.37	43.47	23.55	39.67	2.72	25.85	20.09	10.85	9.13	9.5	3.65	31.78	15.81	34.73	27.58	39.43	10.26	32.04	24.94	35.31	17.28	25.29	6.63	12.49	12.98	26.53	13.68	15.72	16	52.67	13.86	36.39	19.72	23.24	41.97	31.5	77.45	41.67	40.32	16.43	67.82	21.4
cds310	34.64	28.82	28.74	2.04	75.25	52.97	38.75	14.41	24.4	41.09	32.96	1	45.98	26.52	14.09	11.87	23.15	12.27	27.36	21.8	34.44	28.68	43.81	16.25	40.78	23.79	29.76	20.97	18.84	8.78	15.09	7.56	44.61	15.7	21.99	22.89	39.22	21.98	48.22	24.89	16.39	39.28	41.77	73.69	48.38	42.54	21.45	88.97	28.96
cds311	116.73	68.83	105.67	34.15	209.08	108.53	107.53	29.75	174.65	110.16	136.06	14.07	143.46	136.77	47.28	44.02	72.4	42.78	96.24	84.26	143.84	93.85	166.57	65.23	156.89	103.23	127.54	80.31	81.52	22.67	71.55	43.66	125.03	60.9	84.65	57.21	197.38	103.01	174.17	94.16	74.3	133.95	158.36	258.96	207.97	165.89	107.78	357.43	93.12
cds312	16.78	13.12	26.75	14.73	22.71	18.22	15.08	3	38.67	27.85	62.88	8.5	85.57	63.45	54.06	60.49	20.97	8.43	68.49	64.36	143.52	69.9	188.83	46.73	113.04	95.98	123.9	62.78	81.01	35.13	91.49	63.97	198.85	72.06	92.6	64.31	138.2	98.97	128.71	99.5	65.43	126.36	134.49	252.01	142.99	155.39	119.77	347.27	142.91
cds313	19.82	18.1	13.25	0.95	20.73	7.8	15.3	2.46	14.66	17.94	16.64	1	16.84	5.47	13.36	3.48	5.24	0.5	19.59	6.11	13.87	19.5	24.59	14.98	24.9	16.52	11.28	12.59	6.45	2.41	8.77	4.36	15.27	3.86	10.1	9.56	20.85	12.21	26.42	7.62	11.32	19.04	38.44	37.63	16.21	24.26	18.51	33.12	13.15
cds314	22.7	23.84	31.37	6.02	27.4	19.23	24.72	9	30.16	32.01	40.35	5	17.87	20.8	8.44	10	6.57	5.84	27.83	9.45	25.95	24.58	53.35	17.12	32.46	28.12	29.05	24.16	14.94	11.99	28.03	18	50.23	13.35	20.32	18.24	64.75	36.79	53.92	26.03	25.04	26.35	32.41	66.91	46.69	46.33	33.81	84.36	32.46
cds315	28.22	37.4	35.15	6	60.09	24.19	31.45	9.3	50	37.67	56.04	1.4	36.02	27.03	10.49	7.61	11.91	7.48	31.55	37.22	56.46	20.59	60.17	23.97	71.38	31.13	37.96	29.07	31.85	5.98	31.35	18.25	51.7	17.4	28.25	34.34	79.42	28.05	62.92	46.76	38	75.42	65.85	98.58	83.29	70.21	28.87	130.64	52.48
cds316	28.44	21.92	23.21	7.09	95.98	26.69	41.19	9.11	50.56	42.11	62.78	3.47	42.12	49.05	19.83	11.89	19.29	13.01	25.66	18.88	40.39	26.77	41.9	9.97	48.49	25.64	38.56	26	34.46	9.38	29.33	11.78	66.42	20.1	27.98	26.97	75.8	33.9	51.91	31.96	47.82	55.83	51.52	84.49	73.23	61.06	34.17	100.73	37.47
cds317	24.72	21.41	20.03	12.01	81.77	49.79	28.13	15.73	38.29	45.05	46.91	1.34	27.23	19	12.87	12.66	10.58	10.92	20.77	24.09	30.18	24.04	44.96	12.28	28.24	17.48	19.51	14.05	17.59	12.44	17.36	7.55	29.62	14.8	10.12	18.03	34.56	23.42	39.05	20.77	9.73	25.07	31.86	61.4	35.58	36.2	10.46	58.64	19.03
cds318	0.56	0.78	0.52	0	0.8	0.56	1.05	0	1	1.74	0.08	0	0.82	0.31	0.83	0.34	0.27	0.7	0.18	0.6	1.79	0	0.76	0.05	1.12	0.52	0.36	1.12	0	0.05	0.41	0.29	0.29	0.2	0.22	0.09	1.38	0.9	1.42	0.81	0.29	0.1	0.46	2.04	1.54	0.86	0.58	1.2	1.11
cds319	0	0	0.08	0	0.08	0.01	0	0	0	0.17	0.07	0	0	0.17	0.28	0.48	0	0	0	0	0.42	0.17	0.23	0.43	0.4	0	0	0	0	0	0	0.08	0	0.17	0.26	0	0	0	0.13	0	0	0.36	0.1	0.07	0	0	0	0.31	0.18
cds32	74.3	41.79	61.05	21.07	141.82	87.55	65.07	23.87	68.09	73.97	72.19	12.7	73.7	41.77	21.66	21.36	45.51	29.33	68.67	45.1	78.37	75.86	126.97	50.29	87.17	50.55	65.44	35.11	44.07	23.4	40.95	24.3	95.2	21.49	48.21	38.87	92.42	63.12	132.18	76.95	85.77	138.18	112.59	194.26	148.69	104.42	71.11	232.24	113.81
cds320	0	0	1.67	1.37	0.9	0	1	0	0	2.57	2.33	0	0	0.81	1.58	0.51	0	0	1.5	0	0.57	2.21	2.26	0.75	2.4	0.18	0	0.6	0	0	0.84	2.88	0.5	1.71	0.73	0.93	1.5	0.99	2.78	1	0	1.6	0.86	1.8	1.5	0.92	1.5	2.16	2.09
cds321	0	0	1.38	1.48	0	0	0	0	0.38	0.93	0.53	0	0	0	0.09	0	0	0	0.52	0	0	0.51	0.42	0.35	0.07	0.77	0	0.37	0.37	0	0.07	0	0	1.03	0	0.03	0	0	0.03	0	0	0	0	0.4	0	0.03	0	0.46	0.59
cds322	43.75	43.28	48.45	24.04	64.15	48.23	51.07	7.63	56.59	59.67	74.84	12.83	53.23	54.92	10.62	11.81	24.13	10.48	60.14	40.02	71.24	66.99	110.05	26.24	99.22	49.62	76.98	49.11	41.95	8.9	50.45	15.9	84.5	38.3	45.81	44.12	105.27	62.16	110.86	58.01	45.64	86.68	94.64	160.77	105.48	103.18	65.49	198.66	73.86
cds323	25.13	21.49	26.3	1.61	41.43	17.97	26.9	6	30.5	22.66	46.38	1	37.22	28	19.9	9	14.53	10.52	22.34	28.97	39.13	29.98	47.29	12.47	47.26	25.82	29.64	22.67	34.48	2.5	18.03	12.29	27.71	18.16	18.59	21.05	36.92	19.29	52.95	16.42	17	36.86	47.81	57.04	64.85	45.2	30.91	86.75	23.75
cds324	33.45	16.91	24.64	18	46.54	18.87	41.4	15	48.22	25.9	40	0	34.5	20.25	10.96	4	13.78	11	25.83	15	35.5	30.68	52.83	15	44.58	32.35	24.61	16.46	28.01	8.78	15	14.36	33.09	5.78	24.15	18.02	34.63	30	45.56	36.82	31.36	56.92	43.36	69	64.41	50.5	31.39	75.87	17.36
cds325	0	0	0	0	0	0	0	0	0	0	0	0	0	0	0	0	0	0	0	0	0	0	0	0	0	0	0	0	0	0	0	0	0	0	0.22	0	0	0.01	0	0	0	0	0	0	0	0	0	0	0
cds326	120.05	72.9	79.34	45.36	152.4	93.8	151.21	27	123	107.06	140.03	8.43	104.22	81.6	48.62	57.06	57.84	41.43	72.78	74.5	79.31	95.34	142.58	63.1	126.5	81.72	126.33	54.03	73.5	28.93	75.2	36.13	125.6	59.11	73.03	71.08	174.04	83.11	161.5	78.77	79.07	141.09	137.21	229.06	142.49	141.24	82.72	290.86	79.19
cds327	2	0	2.28	0	1	0	1.81	0	2.5	2	4.5	0	9.86	7.16	6.19	3.89	0	3	13.1	5.41	12.64	5.22	16.76	4.75	9.44	2.48	7.23	4.78	6.02	2	5.68	9.6	20.23	10.23	2.72	4	11.2	8.75	14.92	4.63	6.81	9.92	6.94	11.83	12.75	12.32	5.52	17.1	4.05
cds328	84.45	62.3	55.4	39.99	155.24	59.79	109.55	27.5	145.15	82.96	107.55	21	117.92	91.12	43.76	30.19	51.22	38.5	97.67	63.79	94.53	74.99	176.24	68.97	121.13	72.76	120.16	55.57	74.09	30.73	85.92	58.03	137.28	64	79.8	70.14	168.31	107.16	136.08	79.15	76.37	161.2	146.99	245.15	180.27	163.4	103.24	280.3	113.71
cds329	22.67	16.58	22.66	7.38	49.56	27.63	23.89	9	26.76	16.4	34.53	3.52	28	24.5	15.64	10.81	14.12	5.36	24.66	19.3	26.82	15.54	44.49	14.38	27.25	15.55	29.19	19.28	17.62	11.17	15.25	6.82	35.14	15.69	16.81	18.27	39.62	19.06	40.25	11.34	22	25.7	33.12	64.37	36.11	23.24	18.58	66.09	23.14
cds33	368.92	321.68	346.33	180.46	555.31	412	461.81	157.97	560.72	430.51	636.1	57.7	482.32	303.32	181.54	92.95	261.47	145.99	291.15	266.62	396.32	312.1	610.22	214.16	442.46	285.35	416.12	205.94	272.97	136.54	230.49	122.96	478.23	138.26	232.62	216.65	650.97	363.38	548.77	261.86	277.5	452.94	508.38	825.77	585.08	478.71	317	984.08	292.04
cds330	66.5	60.21	69.98	37.54	138.7	95.57	71.91	16.04	110.52	71.14	100.83	17.49	70.24	70.99	28.43	30.65	55.93	26.97	57.38	64	83.26	79.85	158.46	39.04	116.14	59.32	87.06	55.67	74.99	33.44	38.99	23.5	106.03	32.76	52.33	51.94	148.32	76.97	131.44	65	61.12	125.73	111.07	203.31	168.37	133.65	78.86	225.86	87.76
cds331	51.37	34.74	25.19	12.86	61.11	40.37	39.92	13.51	44.22	50.28	64.57	8.53	51.94	36.71	16.52	11.37	21.42	19.91	45.23	37.71	43.01	46	105.63	37.08	79.44	43.3	54.33	33.61	32.78	16.38	22.34	11.69	53.08	31.52	37.88	25.82	101.75	42.14	85	45.33	24.03	60.13	60.52	108.59	76.84	77.11	63.03	154.63	35.14
cds332	0	0	0	0	1	2.03	0	0	0	2	1	0	0	0.15	0	1	0	1	0.5	2.84	4	1.56	2	0	1	0.48	1.34	2.69	2.4	2.41	2.6	0.47	3.34	1.18	1.05	4	1.58	0	3.5	0	0	3	5.77	1.99	0.66	0	2	4.83	1
cds333	2.62	3.12	1.09	0	5.27	2.69	6.43	0	6.98	6.16	1.45	0	1.08	4.99	0.49	0.2	1	0.95	5.56	2.24	6.07	2.28	3.8	1.57	4.39	5.98	8	3.2	4.63	1.61	4.91	2.77	5.28	1.27	5.79	3.07	8.38	5.68	10.86	2.22	3.87	7.26	5.15	10.04	8.47	9.89	4.21	9.37	4.53
cds334	35.86	19	25.53	12	40.28	27	30.77	4	28.79	22.85	38.42	4	34.31	35.25	13	10.9	11	8.81	37.3	31.82	38.05	44.08	86.67	16.4	52.54	31.1	43.8	34.66	23.5	14.31	27.07	14	48.53	25	27.55	27	71.56	41.06	56.66	41.76	43.61	69.96	59.35	94.04	68.86	70.76	41.5	120.91	41.9
cds335	124.28	99.48	94.02	53.07	214.15	150.72	145.49	36.83	176.49	142.8	181.55	19.96	150.18	161.13	87.92	69.26	96.13	71.14	126.16	102.12	122.94	129.15	262.93	83.93	159.47	110.13	147.25	99.85	124.11	49.65	79.08	64.68	218.78	84.38	91.7	102.09	236.23	137.42	250.9	91.84	112.33	208.52	192.65	337.92	238.32	194.05	137.14	385.51	133.38
cds336	46.3	26.79	40.42	24.69	72.22	46.11	43.42	6.42	60.55	49.92	65.57	6.77	37.78	38.63	19.13	25.47	26.68	19.92	35.61	40.64	48.33	46.57	83.16	21.62	61.13	37.71	50.83	42.1	41.87	18.43	41.21	23.82	62.97	24.1	37.56	37.76	69.26	61.85	85.37	53.31	35.46	83.06	92.11	141.17	106.26	83.72	47.88	139.57	61.7
cds337	65.77	48.42	57.96	29.39	107.12	95.39	66.8	18.4	73.59	66.59	109.43	13.29	73.88	49.32	27.91	24.81	40.47	25.32	59.08	37.88	80.84	60.46	141.54	33.84	98.35	69.44	63.86	25.66	50.76	24.5	45.26	32.27	100.16	41.2	49.45	42.43	120.91	69.85	121.19	53.62	48.82	101.03	93.85	215.89	99.34	114.61	71.19	189.29	40.81
cds338	48.57	31.85	38.04	18.23	63.87	49.52	43.8	22.52	101.51	115.71	173.54	12.11	206.27	181.83	36.21	40.42	28.89	22.98	110.01	88.45	155.96	109.55	231.18	69	168.58	128.6	188.56	148.61	131.26	59.24	127.7	85.58	245.06	111.66	110.23	101.86	246.76	162.58	205.94	132.7	140.19	239.38	202.7	302.43	258.25	226.71	171.93	389.57	193.07
cds339	113.96	82.36	95.68	32.78	161.34	125.11	99.81	38.3	197.17	209.16	327.99	35.21	416.87	275.78	90.05	70.89	66.54	43.22	204.24	143.29	284.38	224.03	559.49	123.41	378.44	238.39	373.87	196.31	244.96	90.49	212.11	131.91	452.96	153.48	203.12	177.52	497.02	265.74	353.85	233.82	202.25	356.58	322.33	547.7	379.59	447.13	284.35	843.11	243.33
cds34	121.91	84.48	134.94	37.19	204.85	145.26	178.88	39.6	151.94	173.87	165.76	16	106.85	97.79	31.4	38.84	53.33	48.08	79.86	50.38	127.32	51.95	171.39	60.99	113.78	99.7	108.89	47.14	64.93	38.87	54.94	34.37	118.97	50.59	66.29	55.95	144.3	105.51	140.31	44.33	34.78	64.31	104.3	181.72	133.92	124.74	81.25	206.36	61.52
cds340	59.41	37.98	55.46	14.19	154.08	97.59	66.36	15.39	110.17	91.89	117.29	9	107.53	119.2	47.4	42.84	54.78	39.12	45.03	43.21	57.25	42.06	79.46	21.33	61.91	29.05	63.12	39.89	34.24	25.28	32.9	21.88	89.89	23.04	41.37	36.49	87.41	38.81	81.58	36.11	33.24	88.29	98.04	138.36	81.52	75.03	36.37	119.62	51.47
cds341	0.11	0.21	0	0	0.04	0	0.51	0	0.53	0	0.51	0.64	0	0.16	0	0	0	0	0	0.05	0	0.05	0	0	0	0.73	0.04	0	0.09	0	0.05	0	0	0.17	0	0	0.99	0.08	0.19	0	0.11	0.09	0.14	0.04	0.49	0	0.08	0	0.69
cds342	58.36	47.08	42.82	29.78	72.9	60.38	77.16	23.68	77.41	63.1	92.97	11.81	70.73	60.14	26.12	24.12	40.3	32.8	42.83	27.53	64.85	59.9	112.72	41.24	91.43	44.85	44.04	38.18	37.17	13.87	50.06	24.89	80.97	29.34	33.41	36.26	97.73	58.8	75.6	32.2	25.12	46.35	69.82	125.98	82.86	84.89	47.18	178.49	47.25
cds343	41.07	31.75	35.31	19.52	50.99	46.39	48.16	20.29	64.93	42.45	50.24	5.34	37.58	39.69	22.67	20.06	15.58	16.46	38.34	29.01	54.42	43.94	81.72	36.48	64.25	44.98	47.01	20.56	29.35	12.2	15.91	14.89	77.16	16.28	22.57	22.79	82.97	41.8	65.52	29.92	31.9	42.31	50.75	86.84	49.96	67.19	43.53	123.09	43.05
cds344	1.41	0.79	1.65	1.86	3.85	1.25	1.87	0	2.69	0.13	1.78	0.12	1.69	1.77	1.5	0.39	0.4	0.94	3.97	1.77	2.57	2.7	4.92	1.32	2.96	4.1	1.91	2.27	0.12	2.5	2.57	0.19	2.34	1.96	0.37	2.66	2.06	0.78	2.36	1.93	2.23	3.9	3.14	6.78	2.01	2.51	3.85	6.69	2.81
cds345	0	0	0	0	0	0	0	0	0	0	0	0	0	0	0	0	0	0	0.1	0	0	0	0	0	0	0	0	0	0	0	0.09	0	0	0	0	0.07	0	0	0.06	0	0	0	0	0.08	0	0	0	0	0
cds346	0	0	0	0	0	0	0	0	0.44	0	0	0	0	0	0	0	0	0	0	0	0	0	0	0	0.58	0	0	0	0	0	0	0	0.58	0	0	0	0	0	0	0	0	0	0	0.34	0	0	0.56	0.52	0
cds347	15.2	12.34	5.72	5.75	29.56	20.99	20.2	7.93	14.34	20.59	17.66	4.7	11.9	16.4	3.77	4.19	5.95	4.09	14.82	16.8	22.88	8.9	18.51	9.46	16.43	11.74	14.77	15.88	13.78	5.79	10.02	3.17	15.71	8.2	9.43	13.23	23.68	9.81	21.41	7.54	5.57	17.65	26.27	39.9	25.29	21.24	19.13	35.25	12.65
cds348	45.97	31.47	25.27	6.52	45.74	47.69	34.66	20.45	41.66	30.19	55.09	6.88	63.12	60.89	18.8	18.1	10.4	11.62	42.63	35.6	47.13	50.26	71.33	24.65	67.17	52.32	49.18	42.33	29.68	15.98	21.85	19.14	63.39	27.47	30.29	27.65	72.45	38.61	70.63	33.3	42.66	79.24	76.2	106.66	93.71	92.84	62.46	110.59	43.87
cds349	18.65	15	11	7	23.78	29.87	19	9.5	16.5	24.48	18.87	1	20.5	21.96	5	2.78	5.99	6.74	16.65	16.25	25.31	22.8	31.57	16	35.54	24.52	25	17	19.65	6	13.5	9.98	39.04	12.46	13.34	14.51	40.16	23.45	58.24	22.1	31.94	31.85	34.02	61.1	44.66	28.59	28.26	78.03	28.7
cds35	115.39	73.08	80.89	43.13	191.86	144.96	115.09	34.74	132.44	140.98	165.87	7.11	104.97	61.92	54.27	43.88	101.38	36.55	83.17	73.29	106.79	123.09	169.11	55.13	131.24	80.78	107.91	62.65	83.44	26.93	71.76	44.15	156.99	49.86	133.5	84.45	153.27	78.67	179.88	83.09	74.79	131.54	129.4	221.87	180.34	172.07	83.29	285.91	89.19
cds350	149.39	89.65	133.2	67.22	238.54	197.15	180.48	39.43	161.05	154.58	185.57	22.3	114.09	95.94	71.75	77.72	96.23	47.66	104.13	89.79	158.44	155.88	234.2	87.11	184.52	122.46	156.08	93.62	142.41	62.58	102.59	70.59	224.18	88.25	129.02	88.77	285.59	147.38	261.41	157.09	131.02	231.82	223.26	374.24	262.98	232.79	169.57	495.5	174.36
cds351	33.54	28.8	41.59	20	68.44	42.55	44.81	18.79	49.06	56.21	38.51	10.57	37.89	58.22	19.73	23.63	14.24	6.11	49.53	39.25	57.71	42.81	89.97	30.7	59.35	46.84	63.62	37.29	45.22	15.54	36.08	19.65	58.92	21.69	27.36	39.82	95.28	50.93	93.42	45.54	37.44	66.14	79.42	141.4	103.33	109.64	51.09	142.2	64.9
cds352	43.44	42.08	46.1	18.68	75.8	69.66	54.27	20.92	61.95	54.22	76.26	8.77	80.33	56.86	27.25	11.98	18.29	23.38	43.7	59.55	76.14	59.08	105.59	44.39	68.26	63.24	72.8	54.83	43.07	10.36	48.88	25.5	96.19	31.79	49.38	47.85	111.35	76.3	112.43	54.53	62.08	112.29	107.8	162.88	136.08	108.43	73.47	174.66	48.81
cds353	46.91	29.09	30.06	17.5	93.87	65.88	50.47	11.74	53.51	50.57	73.19	7.99	46.51	37.54	16.86	20.52	41.16	14.51	39.1	30.07	52.45	48.14	85.45	36.59	66.15	42.47	52.92	39.62	28.59	15.28	42.76	15.57	65.41	21.74	45.96	42.61	87.99	43.58	73.79	45.82	44.42	57.43	68.92	110.62	85.58	66.99	48.35	156.06	36.05
cds354	56.45	54.59	61.57	35.99	96.04	63.73	68.83	12.3	87.95	90.94	115.6	13.92	70.8	89.79	35.28	38.08	54.89	24.28	93.29	48.88	95.66	69.48	126.18	54.1	96.66	68.62	111.32	50.55	86.47	32.49	53.22	35.78	123.07	47.96	64.09	51.03	134.06	82.49	189.27	83.59	79.39	178.25	145.07	274.94	152.15	161.88	82.89	252.09	131.65
cds355	2.52	5	2	4	9.34	7	5.5	0	13	2	9.12	0	4.5	4	3	2	0	4	2.5	2	3	6.52	14	4.01	9.23	7.93	8.94	4.12	8.76	0	4.47	0	6	3.83	6.21	3	7	8	13.5	2	6	7	4.54	12.61	13.95	9.76	5	16.5	6
cds356	166.67	103.88	166.53	59.24	349.51	208.44	204.14	50.11	271.45	206.47	301.4	45.39	267.21	286.85	177.55	173.36	140.76	100.22	254.1	187.44	305.71	210.41	502.95	174.5	349.99	221.82	288.81	166.39	210.48	103.94	264.8	125.19	475.39	177.39	248.91	197.65	399.92	271.69	397.6	179.02	181.55	320.85	356.63	616.7	422.56	417.52	247.05	713.51	252.3
cds357	65.24	45.47	56.55	46.54	115.78	80.35	74.27	30.49	88.24	64.5	79.4	7.61	62.44	52.08	27.12	25.82	45.84	21.76	43.09	43.58	64.91	70.1	130.87	46.57	88.87	53.02	56.08	42.5	49.13	20.83	35.75	18.09	92.5	39.81	54.05	43.8	93.06	59.52	138.59	55.47	52.26	107.98	105.17	154.29	100.76	119.63	66.51	150.51	53.94
cds358	36.53	24.39	34.23	10.64	73.21	38.5	45.63	10.84	69.05	56.49	137.96	11.24	265.19	179.61	137.03	162.24	38.99	16.55	160.94	104.46	305.71	138.61	516.19	99.58	256.56	164.09	267.74	171.64	183.58	76.93	323.7	163.87	514.92	210.89	172.89	143.66	273.02	171.77	160.54	130.29	89	192.16	132.06	236.06	172.67	234.4	196.68	450.48	144.66
cds359	148.45	95.79	124.97	49.22	160.93	118.89	171.3	46.82	194	126.27	223.48	35.49	154.11	133.01	60.58	44.77	83.58	37.82	87.03	95.75	113.17	120.08	193.27	62.9	158.95	105	162.91	80.31	120.17	46.43	99.05	45.5	180.58	60.79	103.78	79.21	207.22	127.7	185.57	115.98	105.28	180.26	138.16	267.77	161.1	201.15	102.59	374.76	137.19
cds36	12.56	13.28	15.17	0.73	47.08	34.44	32.33	4.72	45.31	26.45	32.7	4.04	30.12	32.06	23.56	8.78	9.17	8.45	18.87	22.76	26.32	12.18	45.64	15.18	22.71	21.09	28.62	15.27	21.55	5.44	14.46	6.86	41.16	15.53	19.12	22.13	46.19	24.28	40.35	36.11	26.37	41.34	30.52	58.52	47.67	38.24	25.26	72.55	39.48
cds360	325.14	268.11	304.47	173.66	609.41	444.33	424.86	105.03	514.03	390.07	529.45	53.18	472.55	423.59	161	133.94	203	142.32	326.54	304.98	350.96	363.31	628.11	213.49	478.07	321.01	446.69	279.58	359.91	143.78	238.9	197.64	512.57	192.01	285.82	262.42	684.04	393.55	671.34	372.83	329.67	642.49	577.21	1067.47	733.31	557.26	352.28	1086.15	404.69
cds361	6.27	4.84	3.62	6	20.56	12.56	7.12	0.99	9.55	13.99	10.66	3.51	8.81	4.54	4.2	1.58	11.52	3.89	6.68	6.58	8.85	9.28	15.55	7.18	14.55	9.95	8.89	2.52	4.32	3.99	1.92	3.8	8.4	2.34	3.98	3.92	10.95	9.34	12.65	3.44	1.42	10.23	11.96	16.62	11.29	9.61	6.23	10.35	6.3
cds362	7.2	4.63	14.18	3.84	18.48	13.29	5.34	3.64	17.18	16.93	32.69	6.37	29.45	26.96	3.75	8.1	5.89	4.64	20.03	14.92	18	6.72	28.15	12.96	34.16	10.8	22.58	13.1	13.48	5.82	9.06	5.75	37.65	16.96	16.84	8.11	29.02	20.01	31.79	16.07	13.97	16.31	20.07	26.76	41.12	43.68	10.06	56.26	22.42
cds363	181.65	154.8	177.13	79.38	431.45	262.92	230.36	73.32	282.91	272.24	266.34	42.11	283.81	282.43	107.04	89.08	99.16	86.5	167.91	156.44	231.88	197.37	284.9	166.86	262.69	174.37	201.56	139.73	138.45	68.8	111.62	78.19	251.6	118.73	150.28	132.45	330.55	170.09	342.77	168.95	167.46	271.76	410	534.78	431.92	273.5	181.65	495.34	204.4
cds364	139.99	98.57	127.62	71.11	302.86	177.09	161.22	57.72	180.89	152.07	195.7	25.42	176.54	163.07	82.58	72.13	95.18	61.22	145.71	121.8	171.48	142.05	251.92	84.23	223.04	103.41	153.75	82.25	104.72	40.17	90.44	49.29	202.11	73.44	89.46	83.59	233.35	132.35	253.19	100.84	98.98	190.86	185.99	348.04	234.06	195.36	106.71	377.6	127.34
cds365	34.86	16.95	32.03	22.72	71.76	44.18	46.8	12.83	28.2	20.29	53.65	6.04	34.26	25.42	15.82	10.84	17.84	5.68	22.91	20.89	36.34	26.5	40.58	19.62	44.14	34.13	19.14	22.47	18.41	10.42	17.87	16.53	28.38	13.03	19.74	18.13	43.69	30.27	55.43	22.31	27.98	41.06	50.65	73.61	47.22	29.41	22.88	60.78	24.24
cds366	18.45	18.99	20.68	15.27	52.01	27.41	30.5	13.02	30.07	26.76	26	4.42	43.62	19.25	8	11.5	12.28	6.69	21.29	26.27	24.84	23.97	37.82	16.31	26.45	28.1	30.21	13.56	16.79	7.78	18.33	9.51	36.88	11.11	7.81	17.92	39.11	28.11	37.94	19.29	18.25	28.15	21.35	51.86	54.84	27.9	29.79	63.11	17.4
cds367	23.12	8.71	14.63	9.47	32.48	18.74	15.41	1.74	28.13	27.92	25.6	4	23.11	25.3	4.22	4.63	9.75	4.13	16.24	16.59	23.99	21.12	32.54	16.47	31.41	13.92	35.12	14.77	18.16	3.18	7.95	10.98	30.62	12.98	13.57	11.46	28.01	30.42	39.6	25.15	24.14	41.84	26.41	57.23	46.9	35.04	21.09	75.51	27.57
cds368	17.01	9.98	20.23	0.81	27.77	11.55	23.59	7.13	36.4	25.25	37.38	0	33.48	25.91	14	8.39	6.82	6.93	22.45	16.31	23.16	22.85	41.43	10.26	44.79	28.66	30.56	13.76	23.95	4.64	26.13	9.7	32.46	14.69	21.18	23.96	51.36	36.47	48.12	33.72	27.86	32.03	41.49	82.31	62.66	41	24.26	64.89	29.51
cds369	2.36	1.96	9.5	3.63	6.67	2.72	5.82	1	8.91	2.01	9.97	1	8.27	3.24	6.64	0.74	2.16	2.5	7.35	9.87	8.14	2.05	10.52	4.72	25.61	4.95	14.63	3.53	12.64	2.42	13.81	2.25	13.37	4.23	10.04	4.19	7.47	8.24	15.07	2.91	4.28	10.6	14.94	20.63	24.06	12.71	4.94	7.54	6.98
cds37	5.61	1.76	2.73	0.26	14.49	4.09	7.92	2.9	12.21	6.87	11.17	1.23	12.18	9.25	2.84	2.08	3.17	2.15	5.76	8.01	7.55	3	6.57	8.32	7.21	4.81	7.99	3.97	8.24	1.47	2.36	4.5	11.54	6.8	8.74	7.8	10.58	9.14	11.75	8.93	10.11	9.12	11.09	11.37	16.93	9.68	10.07	22.1	8
cds370	0	0.83	1	0	0.53	1.88	0.34	0	2.11	0.18	1.83	0	0.32	0.88	0.16	0	1.14	0.11	1.92	0.63	1.69	1.16	1.3	1.7	1.45	1.22	1.35	0.93	1.84	1.44	2.77	0	2.21	0.3	0.08	1	1.52	2.02	4.22	0	0.17	2.15	1.96	6.62	3.38	0.08	0.19	3.98	0.51
cds371	39.54	37.03	55.24	13.99	86.75	65.66	68.46	34.32	69.17	46.07	85.71	6.72	48.46	43.32	28.82	28.86	22.17	16.72	42.27	21.65	50.43	53.36	77.64	23.42	72.9	34.84	39.79	40.31	26.59	6.7	21.5	14.48	51.68	25.61	34.18	24.83	67.65	39.93	72.06	33.54	33.87	67.63	60.7	116.83	84.57	54	35.25	96.18	41.22
cds372	3.17	2.61	1.65	0	7.58	1.44	3.64	0.35	4.67	2.66	2	0	2.28	3.63	1.34	1.49	1.21	1.43	7.07	3.64	4.4	3.11	10.07	1.12	11.11	2.6	5.82	3.42	5.96	1	2.1	2.87	12.04	3.09	3.45	5.53	10.6	7.03	8.18	5.6	2.81	11.27	10.17	16.61	11.64	12.15	7.13	13.69	3.18
cds373	64.45	53.93	63.37	35.87	106.51	85.44	76.05	11	92.6	64.59	77.5	7.47	72.46	55.49	32.71	22.67	43.55	23.92	56.77	44.74	62.48	50.97	110.14	48.98	97.79	59.3	91.91	40.86	54.5	17.26	47.19	23.77	105.86	35.09	58.71	53.45	122.31	81.55	131.29	80.46	92.66	131.14	125.42	199.52	155.18	116.27	78.79	226.58	77.97
cds374	2.4	1.88	2.18	1.64	2.72	2.5	3.35	0	7.76	3.75	3.16	0	3.32	3.8	1	0	0.91	1.54	14.84	5.23	16.49	10.77	26.28	8.35	11.6	7.98	12.76	8.71	11	1.31	7.75	4.61	12.71	4.57	10.56	8.54	26.65	15.91	40.29	42.55	57.98	73.56	43.12	112.11	78.78	38.51	40.62	155.02	121.33
cds375	127.3	102.91	119.92	49.4	208.67	149.85	142.01	41.5	133.37	135.07	153.05	24.2	135.42	101.98	55.79	25.12	69.02	34.58	100.26	88.95	146.11	129.4	217.13	79.81	169.24	110.69	142.79	63.01	83.37	34.53	95.69	48.98	142.21	58.45	90.13	69.47	231.41	155.21	234.48	161.81	151.66	264.52	227.29	366.19	257.93	259.84	146.04	467.81	193.69
cds376	16.59	19.34	40.11	7.94	73.65	45.01	34.62	14.3	47.23	31.02	66.67	5.34	57.43	41.02	34.6	21.57	23.28	13.98	40.55	21.26	62.34	35.85	102.78	18.93	67.96	37.08	60.25	43.76	48.11	23.59	63.87	34.46	115.69	58.9	68.83	47.78	115.13	66.69	105.95	40.61	21.31	100.41	89.65	171.01	107.2	121.95	75.73	196.36	63.43
cds377	14.93	8.41	12.96	3.23	43.81	37.53	14.48	12.06	27.47	25.45	31.29	3.31	24.84	17.56	13.94	12.37	16.67	5.65	18.15	14.32	23.02	27.19	28.54	15.92	23.15	19.9	27.79	17.41	20.21	7	21.75	9.68	38.95	13.09	29.81	12.07	30.34	13.01	33.6	21.64	14.21	40.83	40.34	68.71	45.51	47.49	25.72	60.95	36.31
cds378	2.18	0.68	0.93	3	2.9	0.42	0.3	0.1	0	0.33	3.16	0	0.87	0.99	0	0.34	0.4	0	2.15	0	0.05	1.22	4.03	0.94	2.43	2.35	1.25	1.1	0.5	1.43	1.95	0.71	4.28	2.32	4.92	1.33	3.33	4.64	2.34	1	0.61	1.93	3.12	4.94	4.6	3.04	1.13	5.99	3.25
cds379	92.02	84.42	106.37	44.54	176.71	125.68	133.16	34.41	157.36	112.79	232.93	17.55	105.81	109.53	38.48	54.04	73.72	29.95	99.58	84.85	137.78	115.41	192.63	70.48	133.7	95.31	163.39	78.08	97.06	47.42	97.55	54.13	190.19	70.18	105.45	67.25	222.44	121.08	195.74	118.34	95.39	196.72	171.94	292.83	192.73	178.95	124.09	312.8	109.9
cds38	0	0	0	0	0	0	0	0	0	0	0	0	0	0	0	0.1	0	0.24	0	0	0	0	0	0.09	0.43	0	0	0	1.37	0.08	0	0	0	0	0	0	0	0	0	0	0	0	0	0.18	0	0.15	0	0	0.69
cds380	12.57	6.81	15.25	4.78	25.24	28.4	20.48	5.48	22.42	30.81	33.9	0.65	19.17	21.15	13.44	11.95	13.52	6.25	23.74	20.53	22.27	18.17	32.25	3.54	26.53	17.9	25.68	13.17	8.35	9.85	12.05	10.14	29.85	14.12	19.12	25.06	42.1	22.27	40.45	29.91	20.32	36.31	32.12	64.07	36.11	43.61	26.47	82.42	40.52
cds381	15.94	5.86	16.03	3.22	36.93	12.25	21.76	0.97	26.56	18.69	53.65	1.33	19.49	28.56	7.2	9.39	7.29	3.19	23.82	16.36	20.32	10.57	24.46	5.64	24.46	20.26	20.89	18.91	10.28	10.84	14.62	13.26	43.74	16.66	20.82	24.18	41.86	30.8	35.26	28.16	17.06	38.39	41.42	75.82	65.03	45.39	32.83	75.85	39.89
cds382	192.17	134.85	151.42	63.4	291.85	245.44	227.71	79.81	298.17	204.91	278.41	34.07	226.41	185.17	83.39	58.33	97.95	55.07	165.61	119.7	193.86	153.5	290.44	105.81	262.56	152.85	188.67	106.46	122.17	70.95	129.62	83.8	231.63	73.73	122.07	126.49	310.6	187.14	292.02	153.65	133.2	258.28	247.21	383.56	318.62	267.01	173.98	505.94	159.65
cds383	121.93	95.77	120.54	68.18	240.79	161.97	147.17	27.76	184.62	140.91	185.67	10.51	141.47	153.61	74.4	56.28	70.13	41.74	113.38	111.7	149.66	124.85	227.5	63.89	168.22	108.57	128.84	83.2	118.06	51.21	91.63	49.52	160.94	58.57	78.5	93.44	234.85	169.89	263.68	101.42	99.61	217.38	234.56	357.97	272.21	260.52	142.67	416.67	128.84
cds384	45.21	33.12	36.08	5.93	104.15	55.82	48.46	8.83	41.16	41.44	66.95	5.99	67.99	48.41	36.68	23.11	34.27	14.94	37.75	30.54	40.54	40.67	63.79	25.53	51.96	46.4	43.48	19.94	11.33	6.43	26.77	15.29	43.83	21.05	27.85	30.38	62.07	27.72	70.72	23.22	22.12	40.91	84.81	93.54	61.73	35.12	37.78	83.56	23.62
cds385	39.64	18.44	40.73	15.06	57.1	43.44	49.26	28.5	72.81	48.53	84.68	6.98	57.85	60.59	20.77	15.87	26.08	13.43	31.31	26.95	46.85	25.99	59.43	19.69	66.44	35.61	43.43	29.21	34.19	15.36	34.22	22.94	52.8	17.26	43.05	19.61	84.51	50.16	69.01	43.81	40.38	63.45	52.75	101.75	66.35	87.4	53.79	127.88	50.37
cds386	71.23	48.01	53.17	28.65	74.08	57.45	54.05	18.1	53.04	70.69	72.6	1.39	53.34	31.48	15.06	9.83	20.78	9.57	65.86	45.06	61.01	68.9	102.85	32.1	60.38	52.97	64.86	44.04	48.24	13.17	29.74	17.05	64.02	26.94	32.18	42.24	106.24	46.8	98.79	60.37	44.87	77.65	69.16	132.72	105.42	88.05	66.74	159.64	64.95
cds387	76.61	79.97	95.69	40.61	148.74	60.7	123.12	30.61	157.19	107.11	155.38	13.06	126.57	108.85	48.76	46.03	47.11	39.87	88.32	88.64	106.35	97.91	170.12	70.96	145.69	98.55	157.34	78.1	87.76	40.69	80	45.7	121.47	66.72	86.87	77.26	204.33	100.01	186.94	75.63	72.49	110.47	145.41	234.82	188.84	182.91	119.81	319.89	84.08
cds388	189.53	120.07	142.91	73.84	197.6	145.76	173.48	40.9	173.03	177.84	193.31	18.39	154.14	116.65	55.95	54.61	73.67	50.15	135.22	112.41	173.39	162.16	219.23	101.23	226.25	121.12	158.43	98.97	129.59	57.19	104.97	69.39	216.39	62.8	111.31	118.1	308.2	190.22	297.95	138.6	157.55	236.03	243.78	466.84	287.05	261.5	199.21	556.72	177.13
cds389	239.09	180.38	215.88	138.65	454.66	299.71	328.4	95.14	403.8	329.92	402.24	41.46	315.42	230.12	112.38	106.36	184.32	81.68	221.48	175.84	272.78	252.63	491.85	145.93	351	221.82	294.48	167.79	179.77	94.54	205.45	86.54	363.66	125.07	177.88	180.42	500.75	253.57	436.25	213.6	201.37	337.42	332.4	597.55	416.04	391.28	256.53	749.69	231.72
cds39	1	1.06	0	0.13	2.12	2	4	0	0.15	0.49	0.88	0	0.52	1	0	1.8	3.04	0.57	0.5	1.85	0.24	1	1.25	0.9	1.29	0	0.11	0.15	3.37	1.34	0.6	1	1.07	0	0	0.41	0.07	0.07	1.56	0	0.39	1.59	2.26	4.78	2.16	0.73	1.09	1.68	2.98
cds390	120.83	91.4	172.76	41.65	308.89	224.93	169.61	45.79	224.44	194.1	343.88	37.73	168.9	194.83	168.94	166.62	68.64	61.26	206.02	171.93	304.17	167.83	466.63	148.44	305.62	193.99	278.24	170.57	245.71	104.97	251.5	150.04	443.62	205.35	198.61	190.13	382.49	224.33	347.21	138.22	132.9	263.53	320.63	496.71	433.49	363.57	242.3	603.72	207.28
cds391	119.28	109.14	117.86	43.38	170.33	117.16	130.17	40.5	180.86	116.56	177.27	17.66	166.46	154.05	54.46	47.24	73.3	40.67	128.26	106.82	157.09	130.64	252.99	58	178.37	112.82	147.41	88.33	106.66	34.81	89.33	60.73	174.27	66.83	84.7	85.49	220.06	125.85	243.65	113.57	89.47	189.22	187.53	313.87	233.12	204.29	127.05	381.62	123.39
cds392	2	1.4	6.44	0	7.91	0.5	4	2	5.65	1.98	1	0.91	3.18	1	3	2.99	0	0	3.11	2.33	3.63	5	7.49	4.39	6.57	3.19	8.82	4.35	3.46	0	4.07	2	2.91	1.9	5	3	5.68	9.85	10.01	1.58	5.31	8.55	8.97	11.22	5.09	6.88	2.92	14.05	3
cds393	87.56	57.37	82.3	50.29	155.85	110.64	84.21	21.3	99.86	85.19	117.1	12.99	102.09	97.42	30.84	31.07	50.71	28.93	78.36	62.6	98.53	100.22	161.96	59.86	105.85	85.83	104.39	59.64	56.77	28.27	67.48	34.18	136.92	49.01	47.18	69.41	184.17	90.44	168.71	85.4	76.07	163.08	153.6	267.73	186.79	164.2	93.27	257.2	96.17
cds394	111.97	70.05	72.47	59.29	153.89	120.17	114.61	19.87	142.47	126.21	137.18	7.18	107.62	106.5	57.85	33.77	73.5	37.48	120.47	60.69	112.57	90.05	176.15	32.82	144.82	80.61	122.58	57.14	100.73	32.46	63.75	45.25	175.36	50.35	74.72	64.94	246.42	108.85	244	74.32	91.32	168.85	114.45	356.13	135.1	192.16	112.81	434.3	107.06
cds395	163.55	136.4	127.6	79.05	295.68	202.16	157.38	51.3	253.69	186.92	232.32	23.03	179.54	156.07	92.29	83.58	120.09	69.04	139.39	129.47	158.04	129.19	294.6	81.52	225.61	119.23	186.11	89.22	139.71	30.82	122.72	65.13	222.17	72.73	115.71	100.47	300.38	147.09	265.1	128.66	106.65	213.76	276.67	415.43	283.82	236.56	153.72	469.98	133.38
cds396	102.05	75.5	95.71	36.75	210.75	169.54	118.34	40.27	154.76	132.71	146.25	9.42	111.53	101.76	46.09	33.87	58.53	40.75	80.54	97.14	110.73	90.45	153.81	66.78	102.73	86.34	112.04	55.08	78.11	26.01	59.81	35.18	135.38	49.38	76.42	77.82	147.04	94.57	164.16	91.15	98.05	177.53	162.67	280.5	164.69	131.83	105.42	288.36	96.5
cds397	68.1	56.3	52.02	38.02	161.89	114.86	65.47	22.77	68.29	113.29	78.44	12.78	62.81	54.24	30.94	33.15	33.91	27.67	59.23	48.22	58.33	57.17	109.19	31.3	74.22	68.31	54.91	42.75	48.09	21.3	28.43	15.22	71.43	33.91	34.6	36.8	72.8	56.71	105.71	36.66	48.81	68.29	84.33	145.52	119.69	88.48	55.81	140.68	61.03
cds398	22.13	10.4	18.62	1.76	29.77	16.28	17.53	1.99	15.68	15.95	24.65	1	25.48	17.36	9.75	8.44	4.04	5.14	23.48	14.26	29.83	12.69	32.68	17.22	25.68	13.5	25.49	7.4	24.82	6.83	9.34	2.37	30.87	13.92	14.6	11.88	23.77	15.47	38.85	13.91	15.51	41.86	25.88	55.58	35.1	33.33	34.76	69.72	17.06
cds399	208.64	169.97	175.74	102.86	443.03	270.36	284.17	69.41	281.56	266.04	355.94	29.3	229.54	193.96	124.62	84.23	128.94	75.96	207.29	186.28	211.87	185.06	365.01	152.99	327.78	178.45	243.43	152.32	145.03	72.74	163.53	84.96	334.71	125.35	187.71	157.39	402.66	217.84	379.88	178.4	158.86	306.17	363.6	562.41	458.22	360.52	214	687.49	225.63
cds4	105.4	70.29	111.7	39.65	209.87	144.49	128.3	29.93	157.33	158.94	168.9	10.41	144.82	135.05	56.16	46.32	39.71	37.58	114.19	93.44	129.93	100.69	208.43	82.65	180.14	136.61	159.67	95.23	106.48	32.2	91.93	46.62	156.31	76.02	73.9	99.45	214.72	139.53	204.49	117.35	102.33	163.19	228.26	336	317.81	227.79	131.03	400.93	151.05
cds40	72.44	76.6	36.5	19.45	84.2	43.51	77.8	17.67	66.12	60.6	64.2	4	69.86	54.48	24.67	18.99	23.28	24.45	63.29	48.52	95.62	72.4	164.23	54.02	146.47	78.41	70.76	48.5	38.76	15.53	28.37	24.5	98.37	37.97	41	44.89	100.68	54.72	140.7	58.23	62	106.07	88.47	191.98	122.19	104.34	92.49	176.65	74.21
cds400	349.97	276.28	375.16	219.74	765.83	477.98	475.86	104.11	606.51	478.35	722.52	66.96	517.34	431.78	278.36	233.56	268.73	178.85	401.11	287.28	494.09	352.3	884.75	225.63	591.11	354.64	618.96	324.59	518.84	220.88	501.58	220.12	965.34	323.69	446.58	362.9	1006.82	481.58	847.36	426.66	392.61	724.52	783.8	1529.19	1065.43	919.16	544.67	1854.65	585.89
cds401	55.63	37.64	45.17	26.25	88.25	44.9	78.68	20	89.21	81.59	96.8	7.5	83.48	54.78	33.12	16.5	25.96	19.75	70.18	47.85	77.77	57.81	95.66	32.7	82.88	53.29	58.71	33.55	42.79	16.88	48.34	30.52	83.37	40.54	41.43	46.56	121.11	59.87	129.63	50.74	62.19	89.61	115.21	162.87	116.84	107.93	56.57	197.55	77.16
cds402	72.86	35.42	71.08	33.02	100.01	107.58	88.39	28.9	57.26	61.51	45.76	6.9	36.72	42.64	17.68	23.11	72.46	28.08	46.36	49.73	57.25	108.56	74.16	35.26	55.37	47.99	99.82	40.57	82.37	15.28	30.66	20.66	93.23	23.81	48.08	28.22	74.12	50.69	85.69	54.65	51.46	123.89	82.56	152.16	90.74	85.51	48.07	170.27	70.65
cds403	274.91	211.02	221.89	95	311.18	215.5	362.12	82.68	401.56	297.96	510.23	39.23	361.38	269.14	144.95	108.75	182.65	90.85	249.87	143	268.32	216.54	488.86	149.78	368.1	220.44	303.44	160.81	176.42	82.43	186.01	96.05	359.19	154.11	203.07	189.24	537.31	267.04	427.11	264.03	225.49	364.65	279.55	525.09	363.55	427.51	256.8	837.66	264.28
cds404	3.5	2	3	1	1	3	4	1.23	3	2	20.55	0	25.97	27.5	46.55	49.19	8.01	1	54.26	24.34	86.46	43.25	162.84	32.19	88.2	53.37	64.7	61.13	61.42	26.56	81.78	53.54	191.49	82.14	75.15	42.67	121.19	86.55	113.35	103.37	108.25	192.73	127.91	272.33	153.04	163.72	121.94	425.4	228.37
cds405	13.38	10.13	11.06	9	24.8	17.31	12.78	6.74	24.02	16.96	23.52	2	14.25	7.26	8.46	11.88	3	6.14	9.72	10.51	15.46	12.08	23.38	8.13	17.67	13.07	7.89	11.97	13.79	1.54	8.1	4.87	29.18	9.71	12.82	8.49	25.58	12.39	28.44	13.6	12.59	16.99	21.86	33.61	30.57	26.19	14.8	46.95	8.99
cds406	74.02	50.07	82.22	41.26	145.44	102.23	99.61	43.96	100.65	121.22	119.09	11.44	86.65	95.32	35.27	27.39	36	26.95	85.93	60.66	92.89	66.34	157.32	35.01	103.51	72.52	92.85	40.28	55.34	35.04	69.51	37.14	105.11	40.58	42.05	53.3	130.39	75.46	121.75	57.85	61.97	107.32	155.32	193.97	141.43	116.24	95.49	186.71	64.63
cds407	64.98	27.64	64.45	11.18	101.37	34	62.37	15.5	80.42	64.89	91.79	6.49	83.14	78.04	50.12	22.44	19	16.99	76.99	51.3	100.97	77.4	149.02	51.25	104.68	78.58	67.98	73.75	53.13	34.58	66.02	33.72	115.92	63.92	72.2	48.52	138.26	88.29	134.41	74.69	61.22	134.36	130.79	179.67	153.7	146.83	90.47	245.09	117.24
cds408	3.49	1.24	1.9	0.82	6.07	0.33	3.95	0	3.72	0.95	4.59	0	2.1	2.52	1.4	1.14	0.96	0.48	1.88	2.26	1.96	1	4.15	1.74	0.74	2.4	2.75	1.55	2.06	0	3.17	1.46	4.46	2.12	2.51	1.28	4.79	1.92	4.98	1.58	2.31	7.91	3.68	4.95	4.14	3.47	2.67	5.62	1.55
cds409	90.43	78.18	96.46	37.53	135.49	75.54	123.2	28.45	126.13	106.19	140.65	13.4	94.24	99.91	36.79	27.8	45.59	31.83	111.07	74.98	109.85	69.47	204.42	49.04	171.88	88.74	121.75	68.34	95.36	32.67	77.44	47.64	144.24	45.26	69.93	83.25	224.19	115.16	211.22	90.46	89.21	157.75	162.35	304.22	196.6	169.82	123.62	362.86	104.5
cds41	1.74	0.98	0	0	2	0.3	0.5	0.5	0	2.61	1.39	0	1.44	0	0	0.48	0	0	0.36	0.64	2	0.59	0.36	0	0	0.19	2.65	0	0.85	0	1.45	1.1	0	0	1	0.48	2.17	0.66	2	0	0.45	0.69	1.25	4.26	0.39	1.73	0.55	3.49	0
cds410	613.24	412.28	580.69	274.95	770.26	527.39	672.31	223.02	964.76	778.01	1063.22	76.33	794.09	689.01	420.44	366.28	465.37	251.59	721.62	536.85	952.05	690.72	1417.05	392.97	965.39	616.1	1040.27	564.68	762.3	318.65	766.54	406.95	1387.38	501.53	935.13	620.81	1597.41	792.98	1467.42	760.28	680.06	1294.07	1169.46	2153.81	1323.37	1451.52	821.98	2875.11	892.1
cds411	36.46	18.83	21.84	12.64	51.93	27.52	32.67	16.36	32.66	29.23	37.53	2.57	23.51	18.63	13.44	5.8	12.51	7.42	19.6	21.09	29.79	23.07	64.13	18.75	35.95	28.61	26.27	19.13	31.78	9.41	28.42	10.56	46.36	19.27	78.3	23.92	56.88	25.1	47.31	28.9	19.3	33.12	44.32	78.79	58.96	55.14	27.95	109.25	31.27
cds412	6.5	4	6.47	2	11.48	5.12	16.43	1	6.9	5.5	10	0	11.03	6	3	0	5.13	1	9.96	7.47	9.18	9.84	18.51	8.06	16.9	9.07	7.5	2.3	5.28	4	6	3	16.45	3.67	8.55	8	13.78	8.94	8.91	3	7.95	5.93	10.77	25.38	8.68	11.74	13.73	30.09	2.93
cds413	2.69	4.57	4.88	2.11	7.49	2.56	4.13	0	6.94	2.91	7.59	1.63	5.34	3.86	0	4.96	1.81	3	3.11	2	7.64	5.19	18.17	2.48	7.96	9.03	5.18	4.68	2.61	3.39	4.93	3	11.03	4.22	5.39	4.76	19.31	8.32	10.78	4.51	1	4.69	13.95	11.41	14.81	14.43	8.89	20.82	2.56
cds414	5.78	3	4.92	1.95	7.78	0.82	3.97	1	2.9	1.71	2.77	0	4.47	1.96	1.78	1	3	0	7.32	6.7	7.9	8.84	5.34	3.89	6.33	4	5.05	5.72	3.94	0.97	8	2	5.43	1.82	4.23	1.68	6.49	5.76	9.48	5.79	4.85	7.76	2.9	16.75	11.64	4.97	3	17.81	7.84
cds415	0	0	0	0	0	0.26	0	0	0	0	0	0	0	0	0	0	0	0.08	0	0	0	0	0	0	0	0	0	0	0	0	0	0	0	0	0	0	0.26	0	0	0.59	0	0	0	0.15	0	0	0	0	0.31
cds416	14.49	11.68	12.85	1.11	47.99	23.89	14.36	2.69	7.18	19.49	17.49	0	15.67	23.38	6.61	10.56	8.27	6.51	19.35	16.89	15.34	17.34	22.85	10.48	25.58	14.37	17.62	13.08	15.29	6.97	7.53	5.2	25.03	10.48	17.24	9.84	20.31	16.52	32.93	22.14	15.37	31.93	31.99	65.15	59.69	29.76	19.74	36.36	34.73
cds417	76.8	41.43	63.44	36.89	118.34	72.1	73.3	23.98	113.93	78.35	117.66	16.42	88.14	56.66	39.6	29.12	42.58	22.86	61.68	53.43	65.93	68.44	125.04	34.35	104.67	66.98	93.2	46.69	59.18	28.71	47.62	39.83	105.07	45.1	71.67	55.61	168.67	65.51	121.2	65.76	86.25	126.26	99.03	170.94	111.67	115.2	68.08	224.37	85.46
cds418	12.19	13.08	17.64	6.56	32.73	24.62	24.36	3	24.4	22.39	23.58	1.55	26.25	13.14	5.89	7.58	8.55	5.1	15.59	12.08	17.12	21.17	26.02	9.57	25.88	12.83	20.23	9.15	9.26	7.9	9.5	8.05	16.18	8.05	11.66	6.2	27.44	20.32	24.79	10.04	22.08	27.12	33.6	50.6	37.57	27.34	17.44	52.06	20.23
cds419	13.97	14.71	9.8	4	22.21	10.88	18.31	0	4.13	7.85	11.47	0.97	15.62	12.17	4.75	2.91	3	4.36	10.59	16.96	10.13	8.02	31.65	9.27	19.3	15.05	13.62	9.87	7.98	3.77	7	4.7	10.13	6.16	5.62	12.02	18.13	14.18	21.24	6.91	5.73	17.89	20.58	30.54	23.42	20.75	9.83	14.96	7.32
cds42	5.83	5	11.98	6.43	6.82	9	19.05	0	11.05	8.45	10.39	0	11.64	3.5	5	4.44	2	1.52	7.28	5	7.26	7.5	12.62	0.67	20.31	8.59	14.06	4.54	10	5	8.51	2.8	9.5	6.61	11	4.5	12.3	7.83	18.19	10	6.44	10.58	16.95	22.45	21.77	12.84	5.5	25.14	6.44
cds420	76.06	52.9	17.31	10.57	51.29	7.04	56.06	10.87	9.34	3.28	8.87	1.78	23.33	36.25	16.55	9.47	4.85	8.97	22.03	25.48	33.01	21.1	54.49	24.03	65.35	38.56	16.58	4.75	29.25	7.99	12.44	8.43	25.52	9.35	25.82	21.5	40.33	29.52	34.89	10.82	13.79	27.51	59.47	87.85	61.92	25.64	22.53	37.22	18.74
cds421	77.68	50.56	11.29	2.4	81.05	22.08	59.46	8.07	5.22	4.69	5.11	0.21	34.3	24.37	18.37	8.7	13	4.41	12.06	17.1	21.24	19.89	46.49	22.2	51.93	33.43	8.3	4.22	10.62	8.7	12.08	5.56	14.09	4.11	19.18	6.68	38.22	19.53	30.97	14.23	11.87	31.06	41.34	55.49	44.23	18.76	17.25	27.51	19.6
cds422	63.39	40.42	9.68	9	72.24	54.87	66.76	17.9	5.85	3.7	7.75	1	19.19	18.79	9.14	7.36	10.31	5.24	11.48	10.38	25.94	14.2	47.69	5.43	31.53	21.04	8.16	2.3	6.33	4.61	12.57	4.95	15.09	3	17.73	13.26	23.97	13.36	22.26	13.98	14.26	10.1	29.81	43.23	25.52	12.03	14.38	36.17	5.72
cds423	0.8	0	0.86	0	1.02	0.9	1.98	0	0.66	0.87	0.7	0.56	1.29	1.3	0.87	0.45	0.6	1.34	0	0.85	0.8	0	1.68	0.42	0.06	0.5	1.07	0	0.86	0	1.81	0	0.81	0.83	0.65	0	0.35	0.72	1.9	0	0	1.17	0.04	0.37	0.98	1.55	0	2.71	1.54
cds424	6	4	3.5	0	7.02	4	4.98	0	1	6	3.96	0	4	2	2.56	1	0	1.62	3.21	2	8.11	1	7.53	1	11.5	2.28	7.38	7.44	14.58	2.42	13.78	2.71	13.09	2	8.06	4	11.32	9.56	9.36	2.59	9.12	13.04	13.93	25.06	18.54	12.54	5.91	38.4	16.55
cds425	0	0	0	0	0	0	0	0	0	0	0	0	0	0	0	0	0	0	0	0	0	0	0	0	0.19	0	1	0	0	0	0	0	0	0	0	0	0	0	0	0	0	0	0	0	0	1	0	0	0
cds426	13.84	15.34	16.19	1.29	40.45	29.4	22.51	8.93	23.61	22.49	29.25	1	14.4	16.57	6.72	6.16	16.89	9.31	15.9	13.37	22.5	11.74	26.51	10.65	23.64	18.69	17.15	11.81	15.52	8.85	18.22	5.9	20.7	10.02	15.76	9.43	28.49	17.49	31.69	14.92	11.09	16.19	17.22	34.49	32.88	24.9	15.38	49.38	14.96
cds427	82.85	59.01	51.78	29.9	136.09	118.19	87.11	19	80.94	99.37	125.12	9.5	96.99	54.03	38.14	25.2	54.55	27.87	68.19	48.47	85.4	85.82	144.11	46.77	116.15	55.98	85.99	51.75	53.58	20.25	41.71	21.49	105.84	36.61	59.67	47.51	152.54	64.78	151.93	55.82	51.76	92.9	110.75	183.18	143.9	130.8	76.77	213.33	68.09
cds428	3.5	12.05	9.62	2	21.13	25.47	14.03	3.84	26.7	14.87	30.79	1	32.1	28.96	6.76	5.09	7.75	7.83	18.88	19	31.24	24.34	40.51	14.67	39.29	23.8	54.04	21.87	33.65	7	33.13	16.72	72.4	14.81	28.81	20.73	51.43	35.48	35.66	26.14	22.2	34.85	31.91	71.6	36.88	60.9	32.79	108.85	39.31
cds429	14.88	8.86	19.37	8.47	42.08	27.68	18.97	7.27	14.56	21.45	11.89	1.45	9.81	15.36	7.49	8.33	9.24	4.87	11.99	14.24	20.84	20.8	21.83	13.19	21.14	19.29	12.1	10.01	17.44	3.72	9.17	3.39	19.41	7.8	8.57	7.54	25.51	16.03	29.28	11.9	12.29	17.88	25.14	27.52	39.05	20.71	13.05	34.1	25.51
cds43	12.28	9.14	10.59	1.28	21.11	7.94	11.73	5.32	9.1	13.83	14.95	0	8.93	7.92	7.33	4.69	3.35	1.98	9.95	5.98	11.24	5.55	10.7	11.37	16.02	9.02	7.55	12.64	4.19	2	6.79	4.68	13	1.11	5.96	5.52	5.02	8.36	12.85	6.44	5.86	13.6	20.32	24.27	15.18	11.91	10.31	20.31	15.7
cds430	261.2	219.23	293.02	155.86	539.44	325.59	343.85	87.57	452.48	367.24	447.75	53.65	389.15	348.62	196.94	156.76	159.18	141.01	305.57	236.59	412.82	299.23	610.77	189.82	454.63	282.91	379.02	243.9	304.61	125.28	267.43	137.81	426.31	189.87	243.59	247.17	639.05	367.14	571.29	366.18	298.28	494.09	565.2	982.82	734.88	583.72	366.56	1110.65	425.5
cds431	208.47	133.42	197.55	86.25	270.03	197.9	212.58	67.8	274.9	199.45	289.19	30	260.38	191.64	79.12	65.74	118.44	53.94	192.49	120.29	228.18	195.37	381.82	124.68	291.19	203.21	237.44	120.47	135.71	77.87	130.11	91.93	243.89	89.57	153.44	161.6	413.75	213.8	297.4	226.76	210.81	307.95	282.87	509.02	374.56	359.46	196.1	592.95	249.39
cds432	724.08	566.72	830	360.01	1194.89	842.69	840.12	232.03	1371.14	936.58	1497.5	111.1	1043.39	845.68	404.27	303.06	377.25	271.1	813.51	633.11	1031.14	750.97	1565.75	489.95	1200.38	773.24	1221.08	604.33	790.25	362.99	769.36	437.03	1421.17	523.58	808.57	705.46	2163.57	1119.93	1681.29	1118.27	1047.46	1661.89	1727.57	2857.16	2261.47	1988.87	1091.18	3762.03	1474.93
cds433	30.06	21.34	34.45	7.42	43.72	12.97	36.57	11.44	62.19	20.69	41.61	3	30.86	31.57	9.95	5.76	18.77	6	24.75	20.97	33.06	16.56	61.32	25.02	36.07	28.68	38.37	24.36	15.81	14.7	27.93	8.03	45.81	10.99	30.7	22.49	68.03	32.96	47.4	35.07	29.83	43.77	40.42	76.41	60.21	43.99	36.69	102.05	38.84
cds434	103.64	99.12	76.6	46.25	190.14	133.68	115.42	32.91	138.75	144.47	155.09	23.7	142.78	122.54	65.55	55.45	88.41	56.09	103.63	118.86	95.42	120.68	173.95	86.07	134.66	116.22	130.27	80.88	99.21	42.68	68.52	47.64	135.6	67.01	59	81.16	181.06	135.11	192.97	90.58	75.55	137.9	211.02	286.66	231.76	180.51	115.13	325.74	93.04
cds435	263.66	206.9	181.46	106.99	463	288.81	332.94	96.92	300.21	270.76	319.53	35.01	270.01	198.31	118.73	93.13	179.91	103.23	236.37	188.95	242.71	223.68	389.05	169.42	317.19	189.28	230.65	127.26	153.92	67.69	129.87	76.09	287.87	106.84	126.25	136.15	326.45	218.31	339.41	163.01	133.23	249.99	277.8	451.01	335.63	306.65	166.86	531.69	140.64
cds436	15.36	6.67	12.61	8.82	50.88	24.46	29.54	1.68	28.08	13.62	18.55	1	9.06	4.5	7.22	5.35	11.98	2.44	10.09	5.9	22.41	12.49	20.6	9.35	15.28	9.55	11.32	9.66	12.76	4.13	6.93	7.8	14.8	2.63	5.56	7.72	17.47	8.22	17.3	11.65	1.67	8.85	31.63	22.32	14.79	14.03	6.71	27.42	7.62
cds437	26.67	27.46	28.99	21	46.96	19.5	25.73	11.57	25.98	19.5	42.37	2	29.97	22.33	13.49	10.99	9.98	9	27.49	19.81	31.01	22.96	42	11.92	32.43	18.15	26.47	20.93	11.5	4.99	16.45	8	33.46	9.99	23.42	24.45	42.98	26.45	54.98	24.93	24.95	41.21	42.92	68.15	37.4	51.18	28.46	86.66	30.47
cds438	2.15	0.95	1.02	0	3.1	0.87	1	0	3.14	1.34	0.73	0	5.28	4.94	1.83	1.83	0	0.37	3.62	2.39	7.14	2.17	6.28	2.8	6.9	6.29	5.67	5.55	3.14	0.07	5.2	2.72	18.18	5.69	4.63	5.81	3.97	4.92	5.36	1.88	1.92	7.27	4.13	3.29	4.53	6.72	3.66	12.07	8.34
cds439	229.1	174.2	224.21	97.93	431.8	273.18	287.23	63.69	347.51	266.55	324.19	25.69	288.1	214.49	120.96	91.62	130.04	98.79	204.34	171.93	243.43	251.49	413.16	130.47	299.07	184.84	246.26	139.62	185.39	74.33	152.22	89.23	299.58	92.7	148.71	141.9	318.22	168.73	397.28	159.04	158.78	300.77	363.97	503.14	305.89	303.05	183.5	557.94	154.4
cds44	14.12	5.45	12.69	0.4	22.72	6.82	13.8	8.01	19.22	6.7	22.75	2.63	24.36	8.73	4.45	9.24	8.52	1.88	11.37	7.12	9.59	9.96	13.68	7.81	22.07	8.52	38.83	6.17	18.38	4.81	15.47	3.43	27.39	8.53	13	9.05	30.05	13.97	21.83	13.57	18.26	23.91	18.03	35.52	32.45	50.03	11.05	66.2	13.97
cds440	193.82	100.15	117.45	72.82	270	179.19	178.17	37.42	221.47	170.2	197.5	18.5	195.21	165.39	55.65	48.8	89.42	53.7	143.44	85.39	175.76	154.44	258.58	87.56	204.6	103.03	174.86	90.93	119.74	41.87	70.74	59.43	194.86	67.35	100.83	106.74	224.79	160.01	243.77	132.37	131.46	221.05	207.74	365.18	286.15	267.14	152.41	412.26	159.4
cds441	1.24	0.26	0	0	2	0.22	1	0	2.21	2.02	2.48	0	1.01	1.65	0	0	0.93	0	6.21	0.63	8.82	2.1	13.4	0	4.84	1.09	4.03	5.7	2.38	1.23	3.02	4.3	7.75	4	7.27	3.87	23.33	10.57	32.78	40.5	30.69	50.07	19.52	59.71	37.7	20.19	7.72	105.86	53.34
cds442	92.5	71.36	92.14	33.76	149.63	81.29	119.39	29	171.95	109.88	162.38	14.6	164.97	113.74	57.17	30.99	43.55	33.18	107.85	81.74	125.36	109.58	242.65	57.79	182.82	113.59	129.52	88.07	91.98	33.08	65.88	47.98	173.07	60.24	91.19	75.69	190.48	116.41	193.65	91.59	94.68	178.22	169.47	279.58	207.06	182.16	105.39	340.56	132.53
cds443	29.45	19.17	27.29	11.5	22.77	21.2	18.16	10	50.12	32.54	31.49	2.65	57.89	34.18	10.07	9.4	9	5.69	29.22	31.57	40.28	41.19	89.92	25.2	66.35	46.37	67.03	36.3	37.13	18.69	42.57	19.95	65.98	31.66	31.73	31.48	73.18	49.01	61.6	29.84	28.73	59.38	79.47	108.11	88.45	86.82	51.41	154.05	64.28
cds444	0.75	0	0.35	0.33	0.45	0.82	0.2	0	0	0.95	1.21	0.12	0	1.09	0	0.35	0.5	0.74	4.36	0	0	1.58	1	0.65	0.67	1.72	1.2	1.2	0	0	0.95	0.07	2.76	2.66	1.87	0.97	0	1.87	3.97	0.39	0.12	3.51	2.42	8.29	1.73	2.51	1.58	1.69	3.69
cds445	22.36	8.52	16.47	8.58	31.64	28.04	26.42	3.03	29.74	18.2	31.79	2.16	26	18.34	9.34	6.93	7.7	5.68	13.91	7.22	23.32	19.56	33.12	6.75	20.71	20.14	20.78	8.64	9.4	2.56	22.72	7.86	24.43	6	14.2	8.43	25.69	8.75	26.31	19.97	12.39	27.33	27.66	51.13	36.23	21.03	15.7	45.46	21.76
cds446	14.17	10.9	11.18	3.43	26.24	12.68	20.83	7.79	22.63	14.97	20.82	1.57	20.13	9.28	3.78	8.82	5.09	2.57	9.07	8.93	15.86	8.09	23.36	4.44	17.44	10.35	19.19	5.19	17.78	3.16	10.44	8.18	24.24	5.65	11.16	6.49	28.67	9.82	27.12	10.79	12.29	18.59	23.62	32.37	22.8	19.1	13.94	27.27	23.11
cds447	21.49	19.2	23.41	5.53	38.32	21.3	25.36	2.59	36.38	31.33	47.34	4	53.44	47.88	30.52	27.35	17.55	13.5	66.91	22.66	66.57	48.1	112.04	30.99	51.47	42.17	61.32	28.25	43.94	20.03	57.11	41.83	136.73	55.18	41.23	34.25	73.12	52.35	55.99	35.04	25.02	58.03	61.17	107.1	68.61	75.44	54.68	124.73	37.14
cds448	11.89	15.12	28.75	7.15	30.18	25.41	19.5	20.98	24.74	36.98	28.3	1.02	25.7	16.27	11.29	15.22	9.13	4.43	21.39	11.6	32.02	19.85	46.74	16.07	29.01	25.97	26.41	19.75	17.16	13.58	22.47	12.58	38.45	13.99	20.43	19.87	50.53	27.01	36.96	17.77	17.14	31.99	42.01	62.41	48.06	45.63	20.85	76.39	38.33
cds449	32.61	25.58	34.97	13.07	60.45	30	41.17	17.33	49.39	54.06	56.55	3.71	44.69	36.64	18.18	13.77	15.1	15.7	38.05	29.87	41.8	34.96	66.73	17.03	47.85	25.38	43.98	38.4	33.92	13.86	27.31	12.83	68.29	28.5	29.32	29.19	66.87	43.71	66.62	39.05	41.9	70.76	47.97	95.34	63.59	71.26	36.05	132.26	55.45
cds45	46.08	43.08	44.02	40.7	70.76	35.63	55.55	26.71	53.04	40.97	83.03	11	48.38	57.36	15.05	12.32	16.66	12.65	66.57	45.97	54.3	46.44	92.12	22.41	80.19	54.11	57.82	29.43	46.04	14.32	34.01	24.38	71.91	20.57	32.13	37.9	84.87	71.74	112.7	55.75	44.14	98.93	84.31	157.12	82.22	74.24	50.36	155.64	64.3
cds450	60.23	56.81	101.19	42.5	132.92	85.29	113.21	17.05	117.78	85.41	130.63	15.94	129.16	88.07	42.93	34.56	42.92	26.02	70.79	50.96	89.35	75.01	147.15	49.61	121.46	64.21	84.48	47.83	68.5	32.93	54.52	45.06	137.04	42.2	49.4	51.06	143.82	89.47	133.38	79.5	77.14	129.04	136.38	225.92	187.06	133.18	92.31	269.23	102.95
cds451	30.59	27.87	31.68	17.95	75.85	44.48	33.29	17.33	72.96	45.23	69.93	0.9	96.65	91.17	81.33	109.43	26.07	23.45	71.33	65.94	107.04	67.4	190.23	39.44	105.83	58.2	115.97	86.17	125.39	45.46	106	55.58	251.4	96.03	116.76	107.77	132.85	98.48	148.93	50.61	52.88	134.61	104.72	226.79	125.1	163.08	96.87	306.23	108.09
cds452	21.46	11.5	22.61	10.21	35.04	17.98	30.17	7.4	44.21	37.11	39.66	7	20.3	25.44	5.4	12.36	10.14	5.51	32.8	22.48	32.53	21.07	48.72	19.83	47.36	27.12	34.94	23.38	18.02	9.16	20.84	4.18	37.2	12.72	23.43	34.15	56.92	38.85	47.06	34.77	27.1	52.44	53.06	94.49	57.03	44.03	37.01	94.17	41.29
cds453	253.99	219.97	216.02	99.35	432.9	240.88	347.39	75.93	355.39	323.91	380.87	50.14	273.34	243.87	150.92	112.83	159.01	98.44	240.27	177.14	263.3	231.83	403.88	138.22	325.59	198.22	263.84	147.01	186.92	68.25	144.17	87.04	334.2	124.71	160.36	151.65	408.76	229.17	408.64	201.32	188.34	307.63	327.6	552.96	396.9	366.54	222.26	616.31	205.45
cds454	114.97	62.86	90.63	44.45	132.81	90.59	112.68	30.8	148.49	106.88	141	12.76	95.59	92.08	52.93	46.95	49.53	32.86	93.13	55.89	114.68	76.99	166.53	65.57	149.68	93.66	117.48	75.95	92.65	47.75	86.79	57.28	141.77	60.78	76.89	67.31	213.15	164.46	196.21	96.56	90.76	173.61	138.09	334.78	261.21	210.88	152.49	357.38	142.15
cds455	56.74	47.38	56.74	25.51	73.54	55.99	52.8	17.47	94.48	57.81	81.07	8.92	68.13	78.06	20.43	19.52	25.13	19.22	53.01	48.02	46.42	24.76	69.71	33.06	55.08	49.2	53.33	40.58	39.16	15.96	37.9	22.57	69.56	28.58	47.74	30.55	74.45	60.96	93.42	44.1	38.43	96.75	80.29	145.65	130.76	81.33	44.07	119.05	44.74
cds456	44.71	34.29	50.05	20.13	83.31	94.42	53.17	7.25	90.71	76.98	85.47	6.85	70.36	72.82	30.43	26.59	29.56	20.1	57.35	55.03	56.09	48.16	72.66	26.83	65.49	56.82	59.44	46.28	44.96	21.97	31.3	23.02	71.68	21.29	40.13	27.44	86.65	57.64	88.56	36.14	40.15	105.09	91.88	93.6	121.56	68.69	46.03	143.62	35.53
cds457	154.2	110.52	116.35	47.67	306.45	154	177.13	32.04	196.71	189.77	267.13	24.21	174.6	178.31	103.82	104.03	99.84	67.07	146.13	116.05	196.23	113.96	314.61	91.31	258.44	124.27	233.18	121.48	127.77	71.97	129.21	77.6	249.15	102.21	119.67	102.32	333.78	162.13	252.68	121.28	92.23	178.95	200.46	389.91	281.03	285.26	178.67	453.7	166.45
cds458	36.16	34.06	42.68	19.66	43.13	54.85	57.19	18.06	68.22	50.99	63.48	4.76	50	39.95	19.49	19.19	37.2	8.78	33.37	26.13	54.81	39.77	82.11	23.88	79.68	45.1	56.64	36.44	36.13	11.83	37.92	16.08	56.63	31.35	33.76	43.13	88.72	42.03	76.38	36.75	31.01	61.5	62.99	120.2	81.37	77.15	51.9	141.72	48.03
cds459	70.42	60.98	63.39	36.08	76.15	75.87	78.54	19.21	87.23	78.65	110.3	12.78	85.7	68.31	22.66	20.07	34.67	15.9	67.16	44.11	67.01	49.15	137.43	42.47	86.09	67.06	99.79	77.85	54.42	33.78	60.85	39.13	111.85	30.84	64.56	57.62	145.66	92.12	114.34	73.8	56.93	88.98	92.31	186.04	148.33	119.43	72.11	221.28	96.54
cds46	343.22	314.12	399.32	163.79	679.26	439.51	503.58	95.92	657.47	525.58	609.44	60.13	553.24	398.41	193.06	154.85	263.67	154.69	391.43	276.85	523.02	393.1	810.78	224.74	597.38	353.76	476.24	270.38	331.93	156.43	332.77	217.6	634.6	209.87	330.68	271.11	799.18	452.47	672.47	354.93	322.55	553.79	569.42	1077.4	798.72	752.63	405.32	1331.36	427.25
cds460	54.4	41.96	50.86	14.37	59.68	30.13	38.01	16.96	56.57	53.69	84.64	6.21	66.76	33.45	21.96	12.57	23.61	10.49	27.75	22.63	69.81	48.43	102.69	32.71	63.5	46.03	65.23	46.1	50.29	20.58	33.99	33.88	77.6	32.61	44.58	26.07	106.13	56.62	101.09	43.82	35.99	94.84	103.38	141.84	103.99	83.3	54.13	172.01	54.16
cds461	6.79	7.73	2.21	0	14.94	5.01	8.84	0.5	2.81	5.07	4.71	4.96	6	2.67	2.91	4.87	3.56	4.32	4.49	6.8	3.59	8.94	17.27	10.43	15.16	7.81	8.36	6.69	2.98	0.31	4.5	2.37	6.38	11	6.54	4.73	9.16	4.64	21.06	11.81	11.05	19.49	16.23	27.43	17.98	11.33	18.46	24.77	16.19
cds462	55.8	36.17	71.94	9.34	185.78	53.68	75.53	19.2	62.23	61.3	83.72	9.6	61.98	50.91	28.88	30.82	41.98	22.81	42.27	57.07	65.97	41.87	67.59	42.74	60.51	38.98	57.49	32.65	44.92	17.93	34.81	20.16	62.42	17.06	41.09	38.22	57.44	32.87	89.26	48.72	49.35	93.35	85.48	106.05	138.26	75.24	28.69	97.78	58.08
cds463	60.97	51.06	61.97	32.47	162.17	65.45	78.81	12	101.81	78.19	95.83	11	106.51	88.4	43.72	52.89	44.21	25.92	90.75	55.03	119.68	65.23	149.11	46.24	102.25	61.84	82.86	57.76	73.43	26.31	87.42	49.33	140.76	63.3	58.08	53.82	143.17	81.48	129.59	86.91	72.75	149.27	140.23	221.76	130.5	120.73	107.23	242.86	92.25
cds464	4	3.81	2.5	0	1	2.74	4	0	14.5	11.97	44.29	0	58.52	55.42	13.5	19.97	3.3	3	45	28.99	52.49	27.91	82.76	19.5	43.96	42.5	51.5	46.46	41	13.99	48.17	42.8	86.71	33.47	32.97	28.46	47.48	50.9	59.1	20.79	18	66.94	51.99	69.7	49.95	68.42	46.68	134.33	37.75
cds465	61.11	41.93	76.28	18.76	92.7	49.93	66.95	11.6	82.79	58.05	104.19	10.69	67.05	70.42	35.93	34.8	20.51	17.47	83.13	49.11	91.27	74.19	119.48	31.81	78.05	72.91	95.41	51.06	65.77	30.31	65.4	20.78	115.77	31.44	74.68	60.84	149.1	88.32	139.88	73.8	71.27	152.92	152.22	239.52	192.31	127.24	82.33	259.44	115
cds466	17.5	19.53	17.23	6.5	39.47	15.29	20.65	2	38.25	27.18	30.57	3	28.16	22.73	6.99	8.67	15.4	12.47	33.99	14.14	27	19	47.19	17.45	35.64	22.07	30.06	20.04	21.46	10.89	11.5	6.93	22.48	15.49	13.76	16.58	44.28	23.76	37.07	23.31	15.93	23.02	35.48	52.38	43.83	37.45	25.33	70.42	20.77
cds467	189.67	168.07	156.02	99.56	236.62	136.49	228.25	64.43	274.99	207.94	230.46	23.95	241.49	190.33	76	65.74	131.66	59.85	156.1	150.61	191.31	213.91	321.56	132.38	274.7	182.38	196.45	109.84	166.57	65.71	108.33	78.64	234.66	122.45	116.44	141.06	300.89	176.31	292.08	130.83	154.47	268.52	242.83	427.27	262.13	267.66	160.84	493.36	155.95
cds468	0.14	0	1.02	0	0.13	0	0.21	0	0	0.21	0	0	0.23	0	0	0	0	0	0	0	0.03	0	0	0.15	0.41	0.17	0.1	0.29	0.19	0.38	0	0	0	0	0.17	0.08	0	0.26	0.58	0	0.36	0.22	0.16	0.34	0.19	0.43	0	0.36	0
cds469	0	1	0	3	1.33	0.52	0	2	0	1	0	0	0	0.29	0	1	0	0	1	0	1	1	0	1	0.42	0	0.24	0	0	0	0	2	1	1	0	2	1.68	0	1.92	1	1	3.6	0.74	3.42	3	0	1.64	1.57	1
cds47	22	12.5	13.93	8.98	24.09	23.13	24.52	3	17.88	27.14	31.13	0	31.7	18.52	11	9.7	16.75	6	11.5	5.93	31.59	13.5	28.98	12.5	22.27	16.25	19.34	10.26	11.95	4.44	13.98	9.5	33.04	9.59	11	10	43.01	27.22	36.45	28.71	19.03	27.68	33.31	61.81	38.39	41.24	29.31	71.83	19.17
cds470	17.01	13.33	26.28	10.53	46.86	28.56	25.63	5.86	27.99	26.36	34.24	0.56	19.51	17.71	8.19	3.96	6.62	3.23	22.28	16.23	28.86	9.32	39.71	16.37	27.79	22.96	24.25	11.91	7.1	4.86	12.75	11.34	30.2	12.15	15.41	25.7	41.12	22.88	34.55	25.1	25.36	22.79	28.26	66.21	57.84	41.72	14.42	70.31	33.64
cds471	174.74	113.57	140.41	51.69	259.82	134.99	177.07	44.7	253.74	179.55	255.79	21	196.89	132.4	66.06	57.56	60.65	33.61	176.77	118.62	231.18	150.72	295.69	109.07	275.77	153.79	195.1	113.53	123.16	49.02	134.47	67.42	213.52	63.67	135.09	107.99	321.72	191.85	264.51	173.94	143.85	221.86	262.44	454.86	383.56	279.91	172.5	480	196.32
cds472	18.79	11.06	25.22	11.63	38.85	27.91	24.95	6.23	27	27.73	56.6	2	22.65	12.83	6.64	5.54	9.51	2	8.67	3.05	23.2	10.25	45.27	13.32	24.85	14.74	19.59	22.52	18.97	4.77	23.2	6.12	24	11.04	16.7	14.95	38.51	27.14	21.95	15.01	11.27	4.89	23.97	58.78	63.46	34.35	23.47	76.72	29.11
cds473	108.45	77.68	99.65	67.21	245.12	148.76	131.3	62.8	195.53	150.95	186.61	15.7	163.89	120.4	98.67	58.94	92.84	58.64	111.95	95.51	132.23	136.16	247.32	79.34	180.56	109.16	134.68	80.02	97.17	50.37	111.82	63.44	184.37	78.71	92.94	88.9	199.35	145.44	250.34	152.38	126.15	219.01	212.74	335.03	264.1	214.82	116.07	377.99	148.92
cds474	94.55	67.39	90.57	47.62	155.26	92.75	108.82	26.58	161.83	109.06	156.25	18.85	126.45	98.97	33.42	40.76	52.14	22.9	107.61	96.39	171.72	89.82	235.8	65.84	155.38	119.79	127.29	88.18	78.38	42.27	73.67	48.1	164.28	62.11	79.92	84.81	216.72	111.58	189.7	90.34	84.75	151.35	189.15	305.93	269.31	173.54	145.28	370.03	112.1
cds475	54.01	44.08	44.26	31.55	90.12	65.06	76.38	3.19	63.24	64.05	87.22	8	62.63	45.95	25.94	20.5	16.5	15	57.86	38.97	75.6	56.35	135.69	40.1	112.25	74.01	81.06	45.21	46.6	15.51	50.66	21.16	80.29	36.78	64.1	41.03	137.38	63.96	102.56	46.31	31.11	65.15	96.11	187.34	117.34	106.24	62.47	196.03	73.02
cds476	1	1.14	3	0	4.92	6.06	6.91	4	2	3.14	2.72	0	5.26	2.63	2	2.4	2.1	2	1.28	0.31	0.5	4.64	6.53	3.24	5.9	1.5	4.69	1.76	1	2	6.2	1	2.07	1	2	1.97	8.08	2	10.41	2	2.49	3.24	7.11	7.43	7.52	5.5	6.11	11.87	2
cds477	0.42	2.84	0	0	4.33	2.67	2.6	0	1.73	3.67	7.11	0.22	1.64	0.36	0.91	3.17	0	0.49	1.12	3.86	3.59	1.07	4.23	0.35	2.01	0.69	2.89	2.79	2.34	2.49	1.12	1.95	5.61	2.53	1.54	5.9	5.1	2.53	4.57	0.71	3.41	3.2	5.01	4.9	9.46	3.71	3.68	3.9	3.62
cds478	0	0.36	0	0	0	0	0	0.68	0	0	0.21	0	0.39	0	0	0	0	0	0.37	0	0.58	0	0	0	0.59	0	0	0	0.23	0	0.21	0	0	0	0.23	0	0.3	0.57	0	0	0	0	0.37	0	0.24	0	0.11	0.99	0.92
cds479	0	0.26	1.53	0	2.59	0	2.68	0.93	0.99	0	1.55	0	1.22	0	0	0	0.71	0	0.46	0	0.21	0	0.74	0	0.17	0	0	0	0.51	0	0.67	0	0	0	1.48	0	0.44	0.95	0	0	0	0	3.28	2.83	1.48	1.78	0.8	3.49	0.74
cds48	36.04	30.41	53.25	6.86	78.92	49.83	65.72	9.99	87.21	53.51	81.57	2.38	54.96	49.56	19.94	14.42	23.53	11.23	59.25	24.95	64.86	47.98	82.25	29.24	68.9	47.53	54.41	40.95	39.27	15.16	38.3	16.41	57.97	16.63	36.98	28.4	111.38	54.8	78.15	56.11	50.35	87.3	79.14	147.68	107.49	72.76	49.95	147.82	51.08
cds480	2.04	0.71	0.66	0	1.34	0	0.51	0	0.42	0.56	0	0	0.63	0.73	0	1.17	0	1.04	0.35	0	0.89	0.68	1.95	0	1.44	0.57	1.09	0.72	0	1.63	2.84	0	1.41	0.2	0	0.57	1.57	0	0.96	0	0	1.16	1.82	1.25	1.9	2.46	0.95	4.28	0
cds481	1.69	2.18	2.02	1	3.26	1	0.35	0	0.43	0.36	1.69	0	1.14	2.17	0	3.56	0	0.83	0.05	1	3.37	0.08	2.77	0	2.26	0.77	3.44	2.13	0	1.01	0.7	1	1.22	1.66	1	0.26	4.67	3	2.72	0	1	2.66	1.67	3.8	2.53	1.3	2.85	6.71	0.89
cds482	0	0	0	0	0	0	0	0	1.34	1	1	0	1	0	0	0	0	0	0.5	0	0	0	1.69	0	0	0	0.43	0	0	0.71	0	0	0	0	0	0.5	0	0	2.87	0	0	1.87	0.83	1.07	1.47	2.36	0	0.88	0.5
cds483	0	0	0	0	0	0	0	0	0.55	0	0	0	0	0	0	0	0	0	0.73	0	0	0	0.21	0	0.5	0	0	0	0	0.08	0	0	0	0	0	0	0	0	0.85	0	0	0	0	0	0.39	0	0	1.35	0
cds484	0	0	0	0	0	0	0	0	0	0	0	0	0	0	0	0	0	0	0	0	0	0	0	0	0	0	0.54	0	0	0	0	0	0	0	0	0	0	0	0	0	0	0	0	0	0	0	0	1.27	0
cds485	3	0	0.21	0	1.85	0	3	0.37	2	2	3.5	0	4.17	0	0	0	0.92	0	2.5	0	2	4.77	2.5	0	3.45	0.5	1.45	1	1.95	0	1	0	0	1	0.04	1.89	1.21	2	5.37	1	1.42	2.99	0	4.04	7.86	3.43	1	7.4	2.54
cds486	29.5	22.66	20.93	9.23	52.39	31.31	33.64	8	33.76	25.59	27.47	0.8	31.14	17.35	15.71	16.07	18.83	4.57	22.62	26.22	26.84	20.48	36.56	15.37	33.39	13	16.37	19.99	11.24	6.61	8.96	4.63	28.49	14.43	10.04	15.05	31.44	17.12	38.48	26.08	12.54	28.72	46.56	65.13	38.18	33.37	24.42	54.09	15.64
cds487	96.12	63.06	91.73	31.62	133.44	94.6	118.43	30.05	124.22	131.62	153.48	11.64	124.61	100.1	38.62	40.2	52.12	42.17	129.57	89.44	146.5	94.55	179.12	75.4	166.34	111.83	149.01	93.87	90.25	51.39	85.53	46.83	196.32	65.66	90.38	113.67	270.07	138.01	221.09	116.31	106.8	184.15	225.16	350.31	319.81	221.87	142.97	441.48	148.75
cds488	37.7	17.69	24.71	13.68	53.24	40.98	33.49	6.88	46.05	40.18	53.62	6.08	44.42	30.18	13.82	14.16	25.29	17.24	40.42	26.18	43.62	29.63	62.85	23	57.3	32.3	46.78	30.74	36.32	16.33	37.82	14.98	67.24	28.74	39.45	32.92	96.66	38.71	85.28	30.02	48.45	69.43	63.7	106.58	78.54	98.11	46.35	198.67	60.84
cds489	47.92	43.5	43.77	37.4	83.77	70.8	62.57	17.1	66.37	67.56	47.1	11.56	57.88	56.7	22.52	26.73	13.72	22.7	44.66	39.2	58.38	64.57	95.28	33.77	73.94	56.64	64.99	55.28	44.2	26.89	32.43	20.9	74.7	22.25	41.32	29.05	94.03	69.17	99.95	44.34	40.62	81.33	79.65	146.2	94.79	99.46	56.43	172.81	60.78
cds49	40	27.8	34.65	12.45	68.81	32.53	41.65	4.2	61.32	38.36	61.88	7.93	43.96	40.86	25.56	16.01	11.73	8.18	43.98	35.73	51.17	25.31	55.7	22.03	56.24	34.99	34.08	20.52	27.9	14.35	25.62	15.02	53.36	17.3	22.94	41.91	72.25	28.95	64.11	29.19	31.15	54.58	65.89	95.81	94.22	72.19	34.4	97.71	35.96
cds490	54.2	39.13	68.69	26.56	147.61	96.52	71.48	16.46	90.33	85.81	97.36	17.05	89.19	58.61	21.82	23.16	34.17	25.38	41.75	33.95	56.88	48.44	108.7	36.51	86.85	44.9	94.55	32.15	58.31	16.03	61.14	12.38	103.18	32.84	42.68	37.46	101.72	53.34	92.05	33.48	37.78	67.67	82.37	141.93	105.68	85.95	54.41	118.72	53.77
cds491	0	0	0	0	0.54	0	0	0	0	0	0	0	0	0	0	0	0	0	0	0	0	0	0.62	0.44	0	0	0	0	0	0.45	0	0	0	0	0	0	0.92	0.5	0	0	0	0.77	0	0	0	1.15	0	1.11	0
cds492	132.5	102.15	150.81	61.64	165.95	150.86	130.27	59.8	166.63	136.73	216.61	14.56	129.22	119.15	58.4	32.69	77.71	48.51	104.57	80.58	125.61	127.72	195.69	69.68	155.39	117.96	130.7	69.4	103.35	37.08	106.47	45.2	173.78	69.66	88.79	81.44	226.6	123.64	242.39	98.37	102.86	237.82	223.52	360.94	261.97	230.93	137.33	360.65	150.73
cds493	147.12	110	173.16	114.33	253.29	235.53	202.99	53.12	208.19	222.04	251.06	32.21	161.84	156.84	78.17	80.22	117.51	65.14	141.32	91.74	146.67	108.05	226.31	82.19	174.02	144.9	155.6	105.13	107.36	46.23	106.02	53.74	225.89	69.91	117.33	98.31	263.07	157.79	246.52	80.29	88.17	142.6	207.13	383.5	249.29	215.66	152.34	416.38	131.2
cds494	297.45	193.02	298.43	112.38	480.48	309.36	340.53	90.61	452.78	352.96	554.32	38.32	351.56	295.22	112.79	119.41	188.78	93.27	277.57	156.36	272.79	224.29	471.82	159.21	395.82	213.16	327.35	151.8	242.88	99.63	202.91	110.5	397.46	111.62	179.11	199.15	563.2	271.63	428.16	200.94	184.47	287.58	387.79	611.55	396.41	399.72	252.31	754.62	228.65
cds495	350.63	249.86	354.09	173.94	506.53	332.87	400.23	122.62	547.33	440.28	607.83	63.95	448.42	395.2	189.24	147.19	218.06	174.17	301.22	186.32	370.85	268.17	555.93	175.43	461.84	271.14	402.55	205.18	284.81	110.7	255.93	136.48	474.67	171.68	257.68	220.82	628.59	324.19	571.99	267.26	201.73	381.22	467.61	770.44	605.46	512.56	320.32	912.02	297.36
cds496	100.79	80.66	89.56	33.83	144.81	94.59	81.59	41.74	139.76	109.69	120.87	19.78	138.65	113.3	35.42	44.54	61	39.66	92.07	78.97	96.39	100.52	163.07	52.06	137.14	89.49	112.01	63.26	71.17	38.04	60.3	33.75	118.01	52.53	63.69	62.61	173.54	83.98	176.73	79.58	81.08	142.23	155.72	259.51	179.16	131.65	83.94	244.82	90.37
cds497	177.64	158.66	134.32	77.5	342.23	285.82	174.46	52.66	203.7	158.32	216.95	25.29	174.24	133.08	103.34	61.17	113.6	60.91	142.28	112.42	165.44	154.49	287.26	104.69	243.69	147.08	151.99	95.81	137.46	44.84	108.99	51.07	212.49	81.59	95.88	101.99	270.26	134.08	257.08	117.38	110.11	175.49	220.08	329.44	224.33	195.2	118.71	392.47	127.51
cds498	34.81	21.89	31.65	16	61.81	50.94	36.57	10	45.35	42.67	55.31	6	41.81	42.38	21	13.14	18.16	21.85	32.66	29.41	37.49	31.8	61.62	22.67	40.47	33.93	26.04	24.88	27	15	15.18	29.49	57.34	29.35	23.63	33.94	53.98	33.83	43.59	36.78	33.53	45.37	48.05	83.84	81.18	55.15	31.42	115.25	39.1
cds499	0	0	0	0	0	0	0	0	0	0.01	0	0	0	0	0	0	0	0	0	0	0.01	0	0.03	0	0	0	0	0	0	0	0	0	0	0	0	0	0	0	0	0	0	0	0	0.13	0	0.07	0	0	0.11
cds5	198.87	176.64	207.28	121.03	317.95	188.86	258.74	64.58	342.96	284.2	381.53	38.51	294.88	256.19	106.59	101.43	138.11	85.91	240.68	167.94	324.67	180.64	454.79	142.23	378.24	203.71	328.59	180.6	181.75	75.12	208.53	97.44	366.05	161.04	207.09	192.85	494.91	288.14	466.63	214.84	163.95	329.92	360.18	696.9	517.1	474.99	273.38	798.65	258.59
cds50	63.8	53.85	57.04	27.94	116.18	76.71	74.81	15.73	66.9	71.68	95.84	3.38	55.39	44.38	22.94	24.36	32.33	18.7	68.63	48.53	63.57	70.01	100.6	37.03	107.19	77.06	52.82	51.71	51.41	13.54	35	20.87	92.59	43.04	40.84	43.42	136.71	76.61	111.56	57.94	60	97.49	91.71	184.7	131.63	117.54	75.24	203.69	84.09
cds500	2.98	2.87	3.07	0.58	4.48	1.64	1.28	0	1.28	1.72	2.27	0	4.06	7.35	0.23	2.49	0.33	1.48	2.03	2.83	9.2	2.3	10.43	5.16	11.6	2.21	9.07	1.4	5.48	0.18	6.78	2.36	11.36	3.15	3.36	1.98	4.84	5.61	10.51	3.38	3.55	6	9.02	11.13	19.16	5.44	5.46	7.32	9.26
cds501	26.14	11.48	19.55	6.03	27.44	16.57	14.88	6.79	28.77	23.96	32.79	4.89	26.65	21.87	4.75	10.69	5.82	6.57	22.44	10.83	39.16	18.19	55.52	18.38	34.9	34.47	29.18	15.69	15.38	4.59	18.08	12.83	39.25	19.8	24.63	22.56	50.4	29.05	52.43	16.48	20.92	39.35	57.72	85.15	72.73	41.7	31.47	91.7	33.29
cds502	0.38	2	1.32	0.99	5.57	0.75	4.35	1.07	4.6	3.27	4.16	1.11	6.99	0.71	0.21	1.04	1.65	0.93	2.1	0.92	2.57	2.7	5.51	1.03	4.09	1.98	4.28	0.29	3.13	2.11	0.86	0.73	6.07	1.87	1.27	0.47	2.63	0.94	5.04	2.46	2.93	6.44	4.65	8.63	4.79	4.2	2.44	10.56	2.9
cds503	39.46	32.13	28.99	15.5	62.67	29.77	50.39	10.39	59.26	54.87	89.22	9.14	74.52	58.5	18.44	21.79	23.27	9.84	60.38	26.46	62.3	41.21	118.16	25.54	82.96	45.11	86.25	50.64	42.4	18.65	54.04	14.61	77.85	26.33	38.79	37.84	103.56	57.06	62.87	36.54	29.7	55.44	59.41	117.33	87.16	81.39	44.16	157.55	45.71
cds504	16.4	15.51	20.83	6	35.94	27.15	25.51	2.36	20.42	24.7	23.08	6.34	36.89	34.46	12.3	7.25	4.29	8.78	19.31	8.95	26.71	11.22	54	11.93	40.48	25.7	29.44	23.41	19.24	11.49	21.06	19.29	27.88	16.77	36.01	18.55	52.71	33.51	56	22.64	13.77	29.44	27.14	65.67	46.7	32.08	32.05	78.06	23.33
cds505	173.57	139.48	198.53	86.99	321.53	165.69	226.63	38.25	322.49	233.63	304.78	24.28	264.37	174.05	105.44	70.38	74.6	57.21	159.52	114.73	205.57	149.47	342.94	90.16	247.26	158.47	224.88	144.1	175.84	77.76	150.12	92.06	281.48	88.16	136.46	123.63	334.55	201.36	335.22	176.95	146.59	314.52	258.11	504.42	355.3	317.71	174.76	594.43	212.03
cds506	1	3	2.66	4	2.82	2	4	3	4	2	3	0	2	1.96	0	0	3	2.8	2.26	3	3	4	8	3	9.78	1	4	1	2	4.75	7.5	1	6.87	3.5	2	1.5	4.55	3	5	0	1	5.5	9.92	10.69	7	5.5	4.58	15.85	3.76
cds507	1	0	1	0	0.96	0	0	0	0.86	0	1.72	0	0.61	0	0	0	1	0.18	0.72	0	1	1	0	0	2.2	0	0	1.79	1	1.05	0	0	3.41	0	1.89	0	0	0.89	2	0	0	1	2.06	1.66	1.94	1.92	0.4	3.68	1.22
cds508	0	0.6	0.51	0	0.22	0.37	0	0	0.91	0.03	0.23	0	0	0	0	0.14	0	0	0	0	0	0	0.33	0	0	0.73	1.18	0.28	0	0	0	0.66	0.18	0.5	0.66	0	0.62	0.52	1.24	0.51	0.61	0.73	0.07	0.93	0	1.58	1.29	1.1	0
cds509	32.7	35.1	44.31	6.77	50.72	29.15	37.77	12	53.26	33.83	40.15	0.95	33.6	30.76	15.7	13.75	13.6	14.16	41.89	25.73	56	20.66	76.58	23.96	51.9	38.78	46.48	25.06	24.9	12.08	24.85	8.58	49	22.77	21.66	30.35	74.02	38.55	68.51	38.12	29.49	78.96	76.41	116.87	101.97	75.75	47.76	115.59	37.46
cds51	168.63	142.82	151.47	94.16	286.18	232.54	204.34	49.47	211.82	197.54	247.7	28.1	183.73	143.3	85.4	60.6	80.4	60.27	148.68	103.44	175.43	184.34	298.77	112.95	252.02	148.35	186.7	95.28	119.34	56.51	89.78	66.26	257.52	69.09	92.28	122.36	314.03	180.34	301.93	133.4	128.65	201.29	238.45	426.43	310.67	246.33	182.83	503.63	137.49
cds510	180.32	115.2	163.65	87.95	265.4	141.89	195.68	46.78	279.82	221.89	285.54	33.5	235.87	200.93	110.81	85.1	98.79	69.46	193.55	139.64	261.65	173.84	335.71	117.36	272.53	165.71	280.6	162.21	159.34	87.33	152.25	91.83	270.16	108.21	143.68	149.79	392.42	191.21	363.98	184.88	164.35	300.25	290.06	534.09	405.17	355.23	209.82	673.81	240.56
cds511	262.7	155.23	201.88	107.42	445.72	265	255.94	104.17	340.77	268.93	343.46	21.6	268.71	210.24	104.33	111.86	137.34	88.15	201.61	168.81	220.13	233.78	334.02	117.21	288.39	153.32	209.61	122.61	142.07	76.07	141.16	77.94	281.74	98.51	168.32	125.76	411.22	203.06	375.88	208.67	168.68	320.43	355.1	590.76	423.91	339.33	182.92	607.87	229.48
cds512	108.37	93.41	127.01	54.17	214.82	127.1	128.54	42	204.41	133.45	213.69	11.56	140.63	109.93	69.11	76.51	75.51	57.47	148.62	107.34	158.3	115.82	251.88	97.02	186.76	101.32	188.25	101.91	118.52	63.8	93.96	61.87	217.91	65.21	117.33	114.2	277	119.99	252.08	127.7	109.69	201.24	232.78	436.91	290.93	220.32	150.05	438.23	169.43
cds513	52.39	47.63	52.73	28.93	93.4	85.22	80.88	22.08	69.82	84.2	89.53	6.99	52.32	77.14	43.28	31.6	31.32	34.13	60.97	64.86	57.81	43.31	110.61	43.43	75.88	55.82	69.39	42.97	53.36	31.41	45.14	33.67	92.76	39.47	61.61	62.98	119.67	88.16	115.78	50.08	53.59	72.42	138.86	195.07	158.16	122.91	78.98	216.66	68.88
cds514	0	0	3.42	0	2.96	1.11	1	0	0	0.08	1.91	0	1.65	0.86	0.38	1.47	0	0	2.87	1.6	1.92	0	0	0.21	2.33	0.64	3	0	0	1.6	0.87	0.84	2.27	0.5	3.89	1	1.88	0	1	1.91	0	2.72	3.76	2.77	1.36	1.87	1.27	2.17	1.84
cds515	0.85	0	0.42	0	0	0	0	0	0	0	0	0	0	0	1.29	0.18	0	0	0.17	1.02	0	0	0	0.64	0	0	0	0	0	0	0	0	0.35	0	0	0	0	0	0	0	0	0	0	0.41	0	0.34	0	0.02	0
cds516	0	0	0	0	0	0	0	0	0	0	0	0	0	0	0	0	0	0	0	0	0	0	0	0	0	0	0	0	0	0	0	0	0	0	0	0	0	0	0	0	0	0	0	0.06	0	0	0	0	0
cds517	80.51	52.08	84.01	35.53	160.92	97.09	102.07	19.56	101.6	70.71	94.96	9.41	64.58	57.11	36.05	15.01	37.32	17.76	70.43	41.79	77.42	67	129.46	58.72	90.86	49.39	61.22	46.88	34.51	18.07	40.83	28.13	112.32	30.36	41.03	45.65	129.15	75.48	106.15	57.83	40.24	77.38	89.57	182.17	123.68	82.57	76.91	177.77	59.55
cds518	66.36	60.07	67.54	29.2	145.2	96.24	97.13	18.86	86.83	77.05	87.06	9.01	58.41	42.54	27.86	29.73	32.1	19.97	68.24	45.2	67.42	62.01	113	42.58	90.74	56.85	68.41	40.8	42.01	26.37	30.05	28.04	72.06	36.68	33.54	52.84	99.04	71.11	106.92	46.76	52.69	64.71	92.43	157.28	140.4	107.91	67.83	192.05	54.63
cds519	51.58	38.84	59.81	29.41	93.6	60.27	71.06	20.78	58.05	73.18	90.7	10.45	55.48	46.51	24.41	19.42	23.69	23.64	43.74	22.63	73.05	12.64	101.35	32.21	87.69	43.22	63.34	48.62	44.2	23.97	42.39	30.7	73.67	25.83	36.22	47.31	100.8	83.65	96.9	40.02	33.38	34.05	76.36	174.55	141.73	98.62	60.39	193.66	81.35
cds52	10.79	10.46	13.19	7.39	27.41	20.9	30.12	3	19.1	24.07	30.7	1	15.79	17.29	13.42	15.21	9.38	6.58	49.19	13.97	67.27	26.18	125.47	17.53	58.51	43.63	77.21	35.43	51.77	17.52	70.93	36.22	122.97	40.56	71.01	50.08	154.81	89.69	144.32	88.52	83.26	145.85	106.55	347.01	235.94	216.57	89.04	684.72	220.62
cds520	126.29	90.88	122.04	41.14	274.91	127.68	122.09	25.18	156.64	145.62	225.07	11.01	121.78	132.94	77.46	57.69	61.12	46.55	129.98	117.09	136.55	117.94	246.13	90.52	159.17	116.15	156.38	100.01	87.95	49.8	98.91	54.2	225.91	89.21	124.96	100.19	278.35	135.64	234.92	125.07	122.14	188.14	220.17	366.71	285.48	236.47	136.26	464.73	147.76
cds521	41.59	35.47	30.87	12.99	88.45	56.11	46	18.5	54.08	49.5	54.85	9.38	50.67	39.11	16.94	14.4	26.54	11.7	42.2	28.16	44.94	48.52	67.2	24.15	45.13	27.84	53.69	28.67	24.43	17.99	38.02	19.54	50.55	18.46	40.57	22.62	74.72	49.57	82.84	38.25	31.41	66.3	70.33	99.74	74.11	79.37	34.5	122.87	50.07
cds522	204.86	119.32	153.84	73.31	301.98	170.92	206.89	58.93	232.62	213.42	291.6	24.92	224.97	210.04	75.32	81.51	123.91	86.6	188.6	132.86	206.27	162.91	338.63	117.67	253.25	145.56	222.63	132.06	132.46	64.66	99.36	83.11	238.93	105.23	138.65	145.32	329.28	190.17	298.95	133.78	150.27	288.36	260.17	452.46	302.77	281.01	178.31	485.19	188.1
cds523	2.24	2.72	0.2	0	0.01	2.33	0.7	1.16	1.16	0.46	1.71	0	0	1.97	1.34	0	0.8	0	2.49	0.33	2.89	0.53	0.92	0.14	2.05	0.56	1.87	2.46	1.09	0	0.95	0	0.84	1.25	0.02	1.57	3.27	0.38	2.01	0.86	1	2.56	5.54	5.1	4.27	1.78	1.65	7.1	0.6
cds524	1.79	2.83	4.21	0.91	0.96	3.6	1.38	0.79	2.02	0.56	4.88	0	0.83	3.31	0.5	0	0	0	1.19	0.61	3.47	3.36	4.25	0.83	4.45	4.23	4.89	2.62	2.48	2.85	3.5	0.89	0.97	0.84	0.95	2.68	10.77	4.36	6.99	2	1	1.99	4.96	19.72	5.46	5.97	2.77	8.11	1.33
cds525	0.89	0.5	0.24	2.95	1.46	3.68	0	2.33	2.43	1.64	2.06	0	4.49	3.55	0	1.89	0.79	0	0	1.04	1.55	0.23	3.86	0.36	3.16	2.79	2.4	1.09	0	0.68	1.28	0	2.04	1.86	0.83	2.25	2.98	2.84	3.32	1.28	1.09	2.9	3.23	6.66	4.25	3.37	1.28	5.78	1.9
cds526	0.68	2	0.11	0.02	3.05	3.12	1.58	0.38	1.29	1.02	1.65	0	1.09	0.13	0	0.54	0.01	1	1	0.1	0.31	2.35	4.04	0.25	2.08	0.03	2.89	2.83	0	2.13	0.01	0	3.37	0.06	1.85	0.3	2.25	1.37	0.43	0.6	1.65	2.08	0	3.39	1.63	2	1.84	2.86	2.67
cds527	1.15	0	1	0	7.27	1.38	1	0	5.49	2	0.5	0	0.24	2.52	1.04	0	3.32	0	1.94	0.87	0.32	3.06	1.63	0	2.23	1	2.18	2.01	1	0.02	1.44	0	2.73	0.34	0.47	1	1.35	1	5.26	3	1.25	1.5	0	3.32	3.09	2.33	1	5.35	1.01
cds528	0.95	0.28	0.34	0	6.93	1.51	1.21	0	4.08	0	1	0	0.78	2.57	0.82	0.15	0.69	0	1.61	3.82	3.11	3.82	1.78	0	2.77	0.48	1.83	1.89	0.68	0.9	0	0	3.73	0.54	2.07	1.46	4.62	1.15	2.93	2.12	0.92	2.18	2.09	5.06	5.36	5.76	0.2	3.77	1.5
cds529	6.73	7.36	10.06	0.91	26.47	20.01	10.69	4.08	19.74	11	19.3	1	14.49	9.38	4.11	7.89	4.94	2.47	7.45	9.21	19.32	12.97	23.2	9.2	16.83	12.09	19.66	13.37	7.25	1	11.83	3.34	18.7	4.7	6.24	2.96	17.37	7.54	21.72	13.97	3.58	21.42	23.19	25.51	35.31	20.02	12.26	31.53	18.93
cds53	0	0	0	0	0	0	0	0	0	0	0	0	0	0	0	0	0	0	0	0	0	0	0	0	0	0	0	0.26	0	0	0	0	0	0	0	0	0	0	0	0	0	0.09	0	0.3	0	0	0	0.35	0
cds530	13.32	7.34	7.88	6.76	32.69	22.22	20.26	2.83	16.12	19.93	22.15	0	7.68	8.41	6	6	5	4.32	11.07	12.91	17.6	13.15	28.06	10.46	21.49	16.69	19.19	10.74	9.53	5	9	9.86	24.25	4.58	14.02	9.54	35.09	15.87	18.16	17.47	16.57	33.23	29.53	51.84	34.89	23.98	13.84	53.64	20.17
cds531	3.58	1.65	6.09	0.86	6.35	1.4	7.86	1.92	7.96	3.16	9.09	0	5.18	1.43	1	1.99	1	1.97	0.7	2.3	2.78	2.09	6.41	4.33	6.31	4.39	4.92	1.26	3.65	0.75	0.77	0.14	4.41	4.27	4.59	2.99	11.39	7.79	8.62	4.2	3.63	6.09	4.34	10.01	5.45	4.35	3.62	17.66	4.2
cds532	3.26	2.11	3.26	0	6.69	2.12	4.75	0	3.43	5.35	3.79	0	2.81	3.61	0.83	0	0.2	0.7	3.85	2.59	5.31	1.85	4.44	5.32	3.71	1.48	4.19	2.73	0.65	0.22	3.35	0	3.15	3.22	2.66	4.99	2.93	0.55	3.01	5.14	1.19	5.88	6.88	14.36	4.48	4.67	5.72	13.61	1.63
cds533	26	20.78	26.62	19.73	50.64	22.31	41.05	11	26.93	22.77	37.7	1	27.12	25.75	12.85	11	8.48	6	21.5	15.02	28.13	28.5	45.65	15.13	34.37	17.84	32.28	24.33	17	3	13.26	7	43.92	13.36	35.27	18.89	42.48	28.04	55.66	24.51	19.83	40.06	37.7	69.45	62.94	54.63	22.03	81.55	31.58
cds534	2.17	2.22	1	2.09	13.02	4.31	4.16	0	7	8.83	10.05	0.73	1.77	0.99	0.35	1.75	2.55	2.94	2.96	3.55	2.87	1	4.85	2.61	6.56	7.54	4.72	3.61	0	1.26	4.41	2.64	3.76	1.6	6.28	5.21	2.57	3.5	6.54	3.1	7.48	2.34	7.01	6.01	16.35	12.47	0.8	9.57	5.48
cds535	12.72	8.41	10	7.77	22.73	14.81	14.17	3.7	11.64	11.84	18.77	0.88	20.41	14.36	7.14	8.9	9.32	2.76	12.23	12.54	16.81	15.74	20.64	10.42	29.6	8.72	18.35	7.79	9.95	4.23	12.66	5.79	27.85	8.65	19.18	12.54	22.02	12.56	28.31	10.95	8.72	22.53	22.38	50.05	30.82	27.68	14.33	51.23	25.08
cds536	16.73	12.52	24.6	5.82	35.67	19.05	25.04	7.71	30.14	22.83	37.83	2.04	23.84	33.54	23.96	15.83	10.73	7.81	30.35	22.55	51.53	27.37	59.57	19	28.72	17.17	42.34	19.49	31.78	12.43	24.99	17.17	62.98	23.87	35.14	27.02	54.01	29.07	66.98	10.05	17.94	38.19	55.99	116.6	77.83	69.27	36.51	115.06	28.87
cds537	0.24	1.18	0	0	4	3	1.25	1	1	2.95	0	0	0	1.57	0	0	0	1	1.5	1.66	0	1.42	0	0	1	0	2	0.65	0	1	1	0.36	0.65	1.77	0	0	2.85	0.83	1	1.52	0	0.83	4.31	2.75	4	1	2.54	5	1.37
cds538	3.5	0	1.5	0	3	0	3.98	0.05	1.59	2.02	1	0.88	2	1.44	0	2.08	1.21	0	1.17	2	2.09	2.8	1.5	3.38	4.93	3.81	4.26	1.58	3	0.88	3	1	1.87	0	4.26	2	3	1.5	3.22	1	1.45	4.02	1.13	3.58	3.58	5.81	3.81	10.32	3
cds539	1.71	1.98	4	0	3.5	0	3.19	0.91	4.33	0	2	0.09	3	3.47	1	0.89	0.75	0	1.29	2.5	3.24	0.09	1.71	1.58	2.91	2.01	2.4	1.97	2.5	0.08	1.5	0	2.75	0	0.66	0	2	1.45	8.44	1	1.05	2.79	1.85	9.03	9.43	6.52	4.46	5.87	2.39
cds54	0	0	0	0	0	0	0	0	0	0	0	0	0	0	0	0	0	0	0	0	0.74	0	0	1	0.28	0	0	0	0	0	0	0	0	0	1	0	0	0	1	0	0	0.01	0.08	0.13	0	0	0.5	0.15	0
cds540	4.05	4.48	3	3	4.16	7	2.41	1.1	10.93	3	7	2	4	7.22	2	1	1	1	4	5	9.42	3.5	10.25	2	8	8.37	2.69	4.52	3	1	3	2	7.31	1	5.5	4	12	4.68	9.43	4	5.43	8.92	7.86	11.99	8.81	14.04	5.16	5.57	4.6
cds541	0.34	0.5	0	0.55	0.51	1.44	0.6	1.14	0.69	0	0	0	0	0.63	0	0.32	0	0	0	0	0	0.95	0	0	0	0.52	0	0.84	0	0	0.72	0	0	0	0.02	0.14	0.46	0.29	0.22	0	0	0.96	0.12	0.61	0.76	0	0	0.21	1.25
cds542	0.45	0	3	2.37	1.31	0.97	3.36	0.71	1.28	7.25	11	0	8	18.13	1	2.65	0.5	0	5	1	1	11.97	6.5	6	6.5	3.09	4	4	1.5	1.47	6.24	10	11.96	3.31	5.94	9.24	7.51	4.7	12.52	3.11	2	14.7	7	14.33	3.88	17	7.5	23.62	3.64
cds543	2.71	0	8.5	0	7.5	1	9	2	8	6.72	10	1	7	2	1	2	0	0	5	4	6.89	3	11	3	15.5	8.5	6	3	2	5.48	7.5	1	8.48	3.61	5.02	2.98	8.41	8.53	11.8	4.81	6.5	14.34	12.5	24.27	14.06	11.53	5	21.98	3
cds544	3	2	3.95	0	0	3	0	0	4	3	3	0	4.69	1.17	1	0	0	0.38	2	0.5	1.22	3	4.98	5.87	4	3.68	4.5	3	5	1	3	3	3.5	0	2.38	2	5.01	3.51	4.2	1	1	2	1	10.56	4.61	4.93	4.06	8	1
cds545	9	5.79	10.4	7	14.5	4.27	2	2	17.95	12	14.11	1	6.83	9.2	3	6	3	2.87	8.97	7.47	16.69	12.29	13.61	6.74	24.08	13.67	13.32	5.7	4.61	6	8.48	6.96	16	7.4	2	10.58	39.49	7.95	16.75	2	8.63	14.27	13.44	28.98	24.69	21	10.72	36.03	4
cds546	5.45	8.87	7.11	0	5.14	6.17	4.09	5	6.27	10.37	13.25	0	8.86	1.06	7	1.19	0	2	13.28	4.46	15.28	9.5	7.54	3.5	9.92	4.69	3.56	8.91	2.28	2.21	11.72	3.16	17.43	8.11	9	5.64	17.05	11.88	19.86	4.1	4.29	9.88	15.92	25.96	14.91	17.99	12.08	22.14	9.93
cds547	1	0.69	0.87	1	5.71	1.02	7.53	0	0.35	3.1	2.57	0	0.62	0.93	2.91	0.78	0	0	2.26	0	3.53	2.5	7.49	1	5.07	0	2	0.93	3.19	1.78	3.32	2.78	2.05	1.79	2	1.76	3.45	6.19	2.62	0.87	0.93	3.1	5.39	3.63	8.47	4.03	0.87	7.35	1.12
cds548	0.25	3	0.81	0	1.52	3.73	2.33	0.64	2.67	2.48	3.05	0	3.15	0.36	1.72	0.5	1	0.24	0.34	1.14	2.09	0.76	2.37	0	2.35	2.26	2.05	1.45	2.37	0.88	3.6	0.03	1.68	0.3	2.66	0.9	3.99	4.02	1	1.95	1.64	1.25	3.49	7.16	5.66	4.96	2.81	13.6	0.38
cds549	0	0	0	0	0	0	0	0	0	0	0.26	0	0	0	0	0	0	0	0	0	1.2	0	0	0.6	0	0.81	0	0.36	0	0.14	0.67	0	0	1.35	0	0	0.34	0.58	0.17	1.23	0.24	0	0.72	1.6	1.21	0.82	0.8	1.53	0
cds55	0	0	1.33	0	0	0	0	0	0	0	0	0	0	0	0	0	0	0	0.16	0	0.5	0	0	0	0	0.8	0	0	0	0	0	0	0.37	0	0	0	0.22	0	0.41	0	0	0	1.48	0.34	0	0	0	0.23	0
cds550	0.83	0	0.78	0	0	1.98	2.91	0	1	0	0.3	0	1.87	1.91	0	0	0	0	1	1.18	2.68	1	2.47	1.26	2.14	1.51	1.96	0.38	4.56	3.02	1.97	0.17	7.12	0.19	2.54	4.04	5.5	2.3	6.37	2.93	3.96	3.58	2.67	11.16	7.07	9.63	3.52	16.57	1.29
cds551	6.99	5	2.11	1.99	4	0	1.04	1	1.97	6.81	4	2.5	2.06	1	1	1	0	0	4.5	4.78	11.85	2	15.46	4.87	7.54	8.97	7	3	9.41	3.54	6.56	5.77	19.62	7.89	8.64	7.87	14.41	10.23	23.54	5.88	4.22	10.17	19.02	39.3	16.21	14.12	9.51	30.09	11.54
cds552	0	0	1	0	0	0	0	0	0	0	0	0	0	0.06	0	0	0	0	0.66	0	0	0	0	0	0	0	0	0	0	0	0	0.5	0	0	0	0	0	0	0	0	1.2	0	0	1	0.76	0	0.03	0.27	0
cds553	14.38	7.13	5.88	9.5	24.18	16.32	13.84	8.37	15.99	20.89	11.39	0.96	7.03	13.81	7.07	3.68	7.48	4.38	6.55	7.41	16.82	11.43	21.32	10.08	34.04	17.03	12.71	10.59	12.29	7.17	13.28	5.8	24.45	8.06	21.28	14.6	31.68	12.52	29.84	13.59	14.61	14.84	26.88	44.79	37.98	30.68	15.38	75.47	19.15
cds554	2.94	3.14	8.5	2.88	9.84	7.5	7.85	2.38	4.57	10.92	11.02	1.72	9.52	5	1	3.42	2	3.63	11.44	1.77	9.42	7	16.5	5.95	23.59	9.7	14.73	6.16	7.53	4	4.19	8.41	17.29	7.36	12.45	8	23.52	19.34	17.58	11.54	12	13.87	23.55	35	24.46	14.17	8.61	56.31	10.24
cds555	1.08	0.71	0.44	0	3.08	0.28	3.11	3.28	1.07	2.12	1.79	0	2.1	1	0	1	0	1.26	2.6	0.5	1	1	6.19	2.01	2.71	1.27	2.19	0.19	2.92	0	2.75	2	2.61	0.55	1.04	1	6.13	1.42	3.22	0	1	4.62	1.2	1.92	5.5	1.57	2.03	5.13	0.96
cds556	9.39	10.41	14.54	2.8	14.28	15.96	15.36	2.66	15.38	10.22	9.1	1	8.36	5.08	4.44	3.35	4.03	3.2	8.7	6.6	16.01	13.11	11.89	2.97	21.46	12.36	9.05	4.86	6	3	1.51	1.12	16.01	7.18	12.53	5.75	29.4	14.21	26.79	10.17	12.78	14.06	11.49	25.04	40.25	18.85	13.86	45.31	14.61
cds557	10	6.82	14.43	2.15	27.85	17.09	21.75	4	15.94	16.76	21.34	2	11.63	12.39	4.55	9.6	5.98	12.77	14.86	9.36	24.74	13.49	25.83	9.44	19.98	23.36	21.35	9	12.63	2.5	17.91	9.42	31.01	9.59	17.84	16.08	34.96	18.51	36.44	14.88	13.11	32.32	30.47	50.76	36.49	35.97	23.46	69.14	16.91
cds558	1.18	0.36	1.02	5	2.22	0.66	1.86	0	1.96	1.63	2.65	0	0.81	1	0	0	1.83	0	1.26	0.57	0.23	6.69	2.56	1	3.68	0	1.71	1.49	0.35	1.27	0	1.42	0.78	0.3	2.92	1.08	1.49	1.76	2.64	1.91	0	2.99	6.7	8.63	2.75	2.59	1.12	7.55	0.8
cds559	56.23	47.42	55.56	30.89	106.64	59.25	69.44	11.89	97.92	63.19	111.81	5.05	78.8	65.98	37.66	34.03	51.57	31.18	89.88	55.55	116.24	65.59	147.04	47.19	94.95	85.8	127.72	76.42	78.95	37.98	83.28	51.73	156.44	57.7	93.81	63.76	168.32	102.58	185.81	87.59	83.65	137.12	194.91	351.99	248.01	169.43	107.71	360.38	143.12
cds56	68.26	37.64	83.52	25.65	117.05	58.26	92.5	13.96	125.12	90.52	131.38	8	98.3	95.1	55.96	41.17	30.61	34.47	86.89	65.33	109.04	53.83	118.06	57.93	88.73	52.82	84.22	52.76	75.01	40.41	65.05	29.93	102.88	36.97	61.16	64.65	149.4	83.38	126.12	99.54	85.61	177.39	123.48	213.96	186.11	130.14	86.5	251.98	120.95
cds560	43.3	31.78	43.67	17.78	60.92	22.79	39.25	10.45	50.94	40.75	69.02	4.47	60.29	29.42	21.53	21.81	20.84	12.12	56	37.96	66.87	23.57	83.03	29.7	73.02	44.29	63.06	32.52	41.1	15.24	44.68	24.31	77.07	29.19	55.97	44.84	108.24	56.74	100.52	51.5	51.74	54.66	95.47	184.7	118.45	109.13	46.56	205.73	73.82
cds561	15.85	5.21	13.26	14.5	27.35	5.24	20.2	6	7.73	15.51	17.78	2	15.02	11.7	6.48	8.02	13.25	5.06	10.67	7.39	19.98	7.35	19.22	10.67	27.61	19.57	18.68	14.04	14.18	4.44	23.55	5.19	24.51	8.7	13.54	14.03	34.97	16.03	29.37	17	13.04	16.16	16.66	46.5	37.03	30.93	10.77	57.57	20.2
cds562	1.51	4.83	3	3	12.74	7	9.08	1	4.61	3.31	6.97	1	4.23	3.12	0	1	1.2	2.43	5.59	3.9	3.43	5	8.5	4	10.62	6.17	8.62	1.72	5	4.04	3.46	3.3	7.6	4.26	7.83	5.21	13.72	4.74	10.61	4.1	4.69	7	10.36	31.7	18.4	7.69	6.6	23.12	13.04
cds563	1.91	3	0.88	1.58	2.85	4	3.33	0	2.18	3.34	2.54	0	0	2.55	1	0.09	1.29	0	3.31	0	0.5	2.9	6.36	1.65	2.13	1	1.45	1	1.28	0	2.06	0.32	4.39	1.85	1.65	2.59	2.37	1.74	3.19	2.38	1.52	1.73	3.5	5.1	2.87	1.16	1.91	13.06	0.01
cds564	2	2.5	3.95	0	4.66	3	4.85	2	5.62	2.75	13.07	0	4.6	4.15	2	3.77	2	1	6.92	2	5.5	6.2	4.16	3	11.25	3.5	4.32	2.65	7.87	1	2.5	1.57	2.79	4.75	7.95	3.75	7.09	2.99	2.55	2.92	4	4.12	3.75	8.08	9.53	5.46	3.71	19.64	12.81
cds565	1.6	2.95	1.22	0.29	2.58	1.68	2.63	0.79	2.23	2.07	5.37	0.84	0.8	3.36	0	1.77	0.28	2.71	0.2	1.44	1.95	0.95	4.38	3.73	6.77	3.36	3.06	1.81	0.79	0	0.83	1.21	1.92	1.31	3.86	1.3	3.53	6.46	8.28	1.26	2.13	5.53	3.26	4.28	3.89	3.87	3.21	5.82	1.34
cds566	1.04	0.49	2.56	0.46	1.39	1.69	0	0	2	2.05	1.3	0	1.01	1	0	0	0.08	1.17	2.53	0.91	7.6	0.76	13.79	0	5.15	2.25	2.77	1.68	3.6	0	2	1.01	1.97	2.15	3.51	1.51	6.2	3.27	3.88	1.65	0.61	3.38	0.3	9.36	5.84	0.55	0.7	6.7	1.46
cds567	1	2.41	1.66	0	1.78	0.82	1.5	0.5	1.19	1.69	1.14	0	1.24	1	0.5	0.78	1	0	2.18	1.72	11.73	0.27	23.61	0.26	3.26	4.36	2.17	1.22	0.21	1	1.02	0.58	1.41	1.5	0.5	1.53	2.62	3.24	8.06	1.91	1.76	0.35	2.38	10.54	6.99	2.49	0.41	7.39	1.22
cds568	5.62	2.19	3.91	1.55	10.45	7.97	9.68	2.32	6.3	8.43	6.17	2.3	4.04	3.55	2.21	2.97	2.64	1.38	7.7	6.34	10.67	9.68	10.28	3.74	7.26	6.45	7.17	7.58	5.23	2.15	1.89	1.9	10.29	3.22	5.25	4.48	10.7	6.43	12.33	5.72	8.24	17.3	7.88	20.82	14.18	11.51	7.51	24.37	7.89
cds569	4	1	2.68	1	6.02	2	4	0	5.97	8.5	12	2	7	5.99	0	5	2	1	4.53	5	4	4	18.94	6.5	12	6.5	7	7.77	11.5	2.5	12	2	8	6.4	16.5	6	14	9.5	18.5	11	10.3	6.52	12	24.07	13.36	18.2	13.27	34.3	7.41
cds57	180.71	151	179.87	84.88	334.21	197.17	206.37	47.69	280.16	228.53	304.17	28.19	306.22	215.64	81.36	76.46	85.47	74.76	238.32	182.5	314.64	240.33	531.13	160.08	387	251.31	377.87	227.29	256.95	115.49	225.35	147.6	414.95	169.55	245.23	222.03	530.85	355.33	532.47	303.27	309.38	458.29	509.86	861.54	659.21	561.19	375.21	950.52	354.81
cds570	127.13	85.54	149.5	57.88	287.95	182.79	164.17	45.57	200.84	219.35	220.55	14.9	149.19	148.12	76.14	70.71	83.11	69.46	120.47	93.07	161.26	117.72	256.95	72.23	164.55	114.01	181.05	108.14	135.23	46.79	109.81	50.8	204.89	89.93	110.29	97.08	274.94	140.91	255.44	114.24	98.59	180.62	199.69	406.48	305.43	259.96	133.64	399.5	155.26
cds571	35.03	21.83	44.64	21.23	40.64	39.02	31.54	15.67	59.22	45.61	48.67	3.69	53	34.13	11.34	5.08	5.93	4.61	35.29	26.07	50.21	45.28	79.8	18.44	55.55	25.89	54.27	34.93	29.03	11.08	30.87	12.72	64.98	21.08	37.15	26.81	71.78	39.66	79.86	39.09	39.89	62.43	76.39	120.13	92.8	103.8	43.13	132.78	49.62
cds572	445.47	277.74	454.01	206.63	566.9	452.07	459.78	148.97	655.46	584.93	689.17	65.83	542.53	458.25	251.73	192.53	349.5	190.52	583.12	356.3	676.66	394.01	1053.12	298.18	788.86	458.22	683.25	341.54	517.06	225.17	455.2	238.06	902.11	304.92	446.2	407.23	1212.5	614.82	1046.94	478.91	443.39	767.76	888.76	1627.83	1065.35	1049.44	609.38	2081.12	627.09
cds573	415.37	331.81	450.78	201.91	779	591.49	532.21	155.18	746.22	635.06	831.93	104.82	612.42	580.64	330.12	225.72	251.02	193.65	629.62	447.07	747.58	470.63	1085.81	335.84	820.82	533.1	824.51	469.25	512.93	243.51	521.8	340.73	909.72	363.57	530.19	513.61	1427.27	807.36	1193.99	679.21	628.65	1088.29	1257.53	2067.15	1752.16	1407.68	830.91	2575.62	858.98
cds574	273.08	209.64	248.94	119.15	488.73	452.95	340.7	177.61	483.07	455.07	574.65	67.14	382.07	350.72	183.36	155.84	216.82	139.86	374.53	279.18	478.32	331	693.01	187.05	512.54	344.06	561.85	310.84	320.89	141.07	314.82	184.27	630.13	230.71	349.5	366.01	834.86	444.58	801.98	388.44	360.81	633.73	736.04	1313.37	958.74	836.19	489.38	1653.24	441.14
cds575	151.91	127.86	114.52	41.94	248.36	179.57	149.27	66.93	230.65	215.07	280.84	44.89	201.2	181.82	95.54	88.2	85.62	59.09	186.38	154.72	244.31	179.01	360.88	107.35	271.65	189.43	289.57	152.15	171.69	85.61	166.45	94	319.07	118.59	191.25	198.23	456.92	245.6	427.38	177.28	184.62	343.3	405.02	694.32	522.71	400.67	266.04	759.52	179.92
cds576	147.66	116.06	110.3	66.46	241.3	213.15	142.73	44.69	234.83	177.35	269.22	35.74	195.42	162.92	84.91	65.25	96.29	63.69	174.13	147.77	218.17	206.3	375.73	119.66	282.38	201.12	247.56	163.67	154.15	66.42	155.5	87.68	325.99	116.61	152.34	164.17	411.83	232.04	364.01	169.74	172.08	317.28	394.13	539.36	420.95	406.04	239.19	669.15	216.22
cds577	121.3	77.75	97.91	37.21	226.2	165.48	135.5	27.02	194.63	162.95	195.11	23.39	140.57	120.35	66.43	53.64	57.1	43.02	132.4	114.99	148.61	137.92	246.95	89.11	186.53	123.72	198.89	97.24	97.76	44.84	133.53	59.86	235.23	61.18	129.29	89.46	291.11	159.72	233.14	119.5	117.96	208.09	243.16	383.25	271.41	250.9	150.7	463.19	132.77
cds578	105.13	68.29	108.83	48.81	196.19	177.21	132.3	49.95	180.42	140.42	173.17	18.5	150.18	114.12	65.63	54.85	66.39	48.98	129.56	93.52	153.46	107.66	261.92	79.69	172.02	111.07	169.38	91.24	100.21	46.17	99.05	57.74	217.8	67.32	104.38	99.54	245.4	150.44	223.6	106.53	106.55	187.9	168.36	333.41	218.42	263.34	133.03	430.74	121.25
cds579	32.93	24.9	42.44	12.21	58.72	51.83	20.65	12.67	40.35	44.03	48.1	5	37.36	32.96	14.6	14.46	21.04	23.48	58.2	36.54	88.24	45.16	135.13	31.46	84.03	54.64	80.99	48.9	58.91	30.1	59.56	31.84	114.85	39.71	52.57	58.57	150.89	97.35	135.54	89.16	56.95	105.74	132.09	202.86	143.93	171.26	98.38	311.36	68.34
cds58	184.85	134.21	156.26	68.97	290.44	230.4	200.54	61.34	262.56	244.76	330.5	37.41	226.22	206.88	97.35	90.44	107.24	96.08	208.88	99.75	215.43	137.04	363.63	112.19	281.11	183.39	240.97	132.67	181.61	68.4	143.51	97.36	268.69	111.83	168.06	125.04	356.3	214.25	373.9	145.77	166	204.04	285.85	581.61	424.01	367.77	224.52	703.08	230.48
cds580	31.81	30.12	38.09	8.64	68.8	53.15	41.49	9.73	69.93	53.11	68.05	7	68.51	71.67	27.66	21.18	24.14	9	57.76	53.46	60.98	57.84	115.03	33.17	86.87	62.66	77.98	66.11	52.41	22.26	41.94	31.21	122.7	38.75	58.58	53.41	142.39	72.86	119.95	60.14	52.63	100.87	121.53	193.72	185.2	127.54	65.99	239.1	72.27
cds581	22.65	19.64	21.09	9.09	32.73	13.53	16.87	11	30.15	27.44	29.74	3	28.09	23.49	4.1	5.45	3	0.79	26.71	15.78	44.71	27.06	35.91	17.3	43.06	26.99	28.94	10.09	28.17	8.55	24.47	9.45	51.74	23.35	28.35	32.63	69.6	29.82	53.54	23.25	19.93	42.69	42.91	89.93	49.74	66.86	48.25	103.44	32.42
cds582	10.4	6	18.67	5.5	31.92	5.11	7.38	0.86	15.37	14.16	20.39	3.37	20.65	11.22	4.21	3.71	0.94	4.4	16.83	10.8	16.38	12.42	24.42	11.16	26.17	7.17	13.65	6.97	10.36	5	13.81	6.22	26.11	3.22	8.7	9.63	24.96	12.96	23.08	8.65	11.8	12.36	15.26	29.69	23.66	24.13	9.75	35.28	16.3
cds583	3.4	10.55	4.94	3.5	16.48	7.83	10.68	0	9.77	8.39	9.74	0.27	12.15	3.12	7.92	4.35	3.99	3.5	7.19	6	12.96	5.48	31.26	8.71	18.76	7.64	12.49	11.17	7.5	4	6.51	3	10.52	7.62	7.13	13.2	14.54	13.2	14.01	2	5.23	9	20.5	29.29	23.14	18.78	12.11	29.28	15.01
cds584	10	6.03	14.44	7	21.16	9.89	16.76	7.37	10.78	7.74	18.84	5.42	6.22	13.04	3.02	3.3	2.17	4.63	7	9.24	22.93	17.93	18.34	7.14	14.2	3.02	11.69	13.49	11.66	3.51	12.58	0.91	15.71	4.53	12.67	2.77	23.89	9.66	20.85	6.53	10.23	15.12	18.06	27.2	23.32	21.72	7.96	34.84	15.27
cds585	1.61	1.21	2	0	2	2.23	1.79	1	3.04	3.56	2	0	3.63	2	1	1	1.17	0	0.5	2	1.88	0.73	5.17	1	1.98	3.5	4.57	0	1.96	0	5	0.9	1.41	0	1.07	1.48	3.34	0	2	3	2	3.42	3	4.13	1	4.5	3.03	1.64	1.72
cds586	14.02	9.53	11.48	4	14.39	12.82	16.97	1.79	11.82	13.15	15.45	0	8	9.32	2.27	6	2.5	2.5	6.41	10.47	15.78	7.1	13.85	12	22.3	11.77	16.13	10.42	12	4.5	14.5	7.5	19.05	8.96	4.5	10.36	24.18	11.3	18.99	9.42	10.84	9.99	22.19	36.46	19.22	14.44	15	38.44	13.53
cds587	116.01	89.01	122.97	65.55	229.99	191.15	133.04	43.66	189.09	151.67	166.28	13.97	149.1	147.78	92.79	68.64	73.46	60.45	118.68	97.76	140.63	92.13	198.53	93.45	184.96	104.76	141.95	77.7	99.05	48.79	117.86	49.17	176.25	54.06	108.98	92.67	208.51	120.33	231.87	106.07	101.7	167.61	203.43	322.5	212.96	202.44	113.88	363.72	126.57
cds588	30.79	18.95	30.43	10.08	72.81	41.23	40.91	5.96	39.88	32.86	55.48	1	21.82	23.36	18.85	10.79	22.86	11.42	32.32	28.32	44.65	24.68	55.19	18.82	44.21	24.69	25.2	18.63	22.92	8.97	15.23	10.3	43.49	14.14	23.5	16.82	43.96	26.81	46.83	19.76	20.44	39.41	45.41	69.16	45.23	38.62	23.34	74.51	31.72
cds589	189.99	113.18	187.89	64.05	382.93	252.62	227.55	77.47	288.65	262.81	311.23	31.87	210.86	204.63	106.1	87.76	92.39	76.31	186.03	142.17	248.25	138.36	343.4	123.64	228.29	159.02	213.63	128.27	140.91	65.5	117.61	89.8	236	91.25	122.22	143.91	309.67	211.99	295.96	171.19	153.35	296.64	284.5	530.22	361.71	272.56	188.87	516.52	248.64
cds59	186.89	184.73	197.63	84.38	316.95	233.87	221.32	58.15	347.31	244.81	346.23	29.47	289.45	251.38	111.45	77.29	125.72	75.88	230.29	136.63	244.19	159.29	388.17	114.04	315.79	228.45	308.85	176.28	211.04	93.67	171.26	95.51	356.78	140.53	175.17	184.64	400.9	235.2	392	170.92	166.38	304.39	329	610.09	409.62	380.11	225.26	706.14	255.31
cds590	778.68	637.93	666.76	370.24	1036.71	910.22	877.08	345.21	1332.41	1067.23	1485.08	152.18	1065.59	894.41	397.52	349.01	472.81	298.68	780.36	475.77	1026.52	573.49	1584.56	427.03	1149.3	774.91	1228.5	579.13	864.54	369.39	795.64	447.63	1295.36	507.77	768.27	713.15	2192.25	1027.98	1549.22	691.57	675.94	1052.42	1373.44	2679.37	1826.71	1948.1	1093.68	3538.43	870.28
cds591	270.95	211.45	240.64	112.72	412.88	277.37	288.93	88.26	261.57	222.81	313.27	23.68	254.99	175.48	93.98	87.96	159.55	99.9	230.02	165.19	258.97	262.78	406.73	164.65	412.03	213.71	224.1	153.82	156.41	62.07	152.78	83.23	291.97	100.89	164.41	154.66	385.73	233.2	370.7	134.27	141.29	248.81	304.84	546.7	390.67	298.6	208.45	624.31	157.38
cds592	1281.93	994.46	1407.59	683.57	2513.59	1858.3	1585.88	515.89	2143.34	1869.37	2598.21	242.6	1828.51	1668.3	1118.01	981	978.41	641.88	1710.53	1271.99	2272.57	1544.89	3363.73	1014.72	2240.46	1509.16	2216.6	1308.39	1923.65	788.14	1747.88	1015.83	3078.46	1135.36	1577.77	1379.4	3615.48	1843.07	2816.33	1488.76	1417.4	2496.06	3022.48	4920.55	3765.5	3177.41	1843.51	5753.67	1898.03
cds593	5.53	1.87	6.73	2.6	6.62	12.47	3.55	4	6	5	7.61	1	13.02	3.68	6	1.98	2	0	6.99	3.5	6	6.17	9.72	0	12	3	12.88	2.11	4.93	3	5.02	0.93	6	2	6.83	2	15.49	7.93	10.67	2	5	1.32	3.94	16.42	18.6	10.19	6	27.9	3.87
cds594	2.75	0	0	0.25	0.7	1	1	0	2	1	1	0	0.34	2.12	1	0.24	1	1	0.51	0	1	0	0.81	0	1.69	0	4	0	0.6	0	2	0	0	0	0	0	4.8	0.04	1.72	0	0	0	0	5.57	2.45	3.32	1	4.65	1
cds595	0.21	0	0	0	1	0	3.57	0	1.98	2.48	0	0	2	6.75	0	0.71	0	0	0	0	1.77	0.93	0	0	1.13	0.97	1	0.99	1.2	0	2.5	1.01	1	0	2	1	1.15	1	2.02	1	0	0	0.5	4.56	7.3	2.1	1	4.08	1.47
cds596	1.55	1	0.85	1	2	0.51	0.21	0	0.88	1.26	3	0	1	4	0	2	0.38	0	0.5	0	0.11	1.55	2.35	0	1.49	0	6.49	0	1.5	0	0	1.71	1	2	0	0	0	3.5	4.06	0	0.32	2.59	1.61	5.98	2.61	1.2	0.87	2.79	2.22
cds597	9.73	6.1	15.79	2.41	26.48	13.41	13.06	1.36	18.71	20.45	8.37	2	12.05	9.38	3.89	3.56	5.93	3	16.48	9.77	13.14	18.29	18.15	9.19	26.11	11.69	11.63	10.5	5.7	2.7	9.31	6.26	13.46	8.06	9.05	8.74	23.46	16.22	25.81	10.3	10.98	16.48	19.32	34.03	29.74	17.68	8.93	30.09	17.67
cds598	2.69	9.37	7.07	1	9.5	7.77	8.44	5.61	11.66	8.22	12.67	0	6.03	6.97	3.21	1.25	1.06	2.35	9.36	2.66	4.38	0.81	18.84	5.53	13.82	8.38	7.85	10.48	1.32	0.3	5.51	3.24	9.98	2.93	7.25	7.94	10.07	6.54	9.11	3.69	1.32	3.1	9.97	21.63	14.51	4.62	9.17	16.47	5.75
cds599	2.28	1.59	4.49	0	3.87	0.24	3.66	0	4.54	3.58	6.86	0	3.37	6.97	1.41	1.89	0.46	0.64	1.62	2.15	3.68	0.48	4.93	1.76	1.67	2.36	2.95	1.49	2.41	1	2.01	0.58	7.57	1.1	1.07	2.79	5.93	3.91	4.01	4.36	1.97	1.01	3.17	12.81	4.97	4.04	3.17	10.2	2.72
cds6	61.57	72.17	65.14	18.28	117.67	64.25	109.69	39.61	96.3	89.85	112.57	9.79	90.78	70.55	31.43	35.54	30.84	30.46	89.66	61.98	107.21	84.89	133.56	55.78	111.41	59.58	81.29	63.16	61.28	21.76	49.36	31.72	132.18	52.57	61.67	60.57	147.13	91.06	135.14	74.45	61.48	121.26	102.92	145.5	150.49	146.42	74.56	214.54	77.93
cds60	235.78	200.32	270.99	100.61	473.99	294.45	281.23	85.73	436.35	327.33	406.79	29.23	291.74	339.95	147.84	111.93	153.75	101.9	323.06	233.56	312.66	275.21	506.37	142.77	366.45	245.2	385.8	196.16	267.18	106.71	221.58	123.55	461.81	156.81	236.18	229.81	581.97	378.52	621.14	324.29	316.29	583.61	457.94	915.08	613.51	603.64	352.62	1046.98	420.31
cds600	0	1.31	4.25	0.96	2.15	2	3.69	0	4.06	1.95	5.84	0	5	3.44	0	0.35	1.53	0	0.61	0.82	2.99	2.5	5.41	2.42	5	5.36	1.36	0	1.4	0	3.15	1.05	1.55	3.64	2.59	1.76	1.94	2.23	0.74	1.62	1.75	1.98	5.15	5.76	6.09	5.29	1.15	4.67	1.81
cds601	2	3.89	2.28	0	3.96	0.73	2.17	0	8.4	6	5.96	0	5.67	4.11	0	0.86	0	0	0.33	0.15	4.2	1.23	4.39	2.48	3.25	2.32	3.09	2	1.06	1	2.97	1.52	4.17	3.16	3.57	1.15	6.28	5.69	2.53	3.75	0	2	5.56	8.49	5.9	6.73	0	12.59	9.26
cds602	0	3.88	4	0	1.68	1	7.39	0	1	1	4.21	0	2.43	1.1	0	0	2	1	1	5.27	3.88	2	1.53	0.5	4	4	2.99	4.17	1.5	1	0.26	0.72	5.98	0	1	1	2.37	5.72	12.12	1.21	3.48	0	2.55	3.19	1.65	3.03	2.59	5.94	7.87
cds603	1	0	1.5	0	0	0	3	0	1.04	0	5.47	0	0.11	0.89	1	0	0	1	1	0.67	3.07	1	4.38	0.5	5.5	2.33	1	0.82	0.38	0	4	0	2.5	0	1	1.39	3.46	2.06	4.85	0.9	1.49	1.12	4.14	3.77	1.84	1.23	4.69	5.28	0.27
cds604	0	0.76	0.32	0	0	0	0	0	0.15	0	0.08	0	1.12	0	0	0	0	0	0	0	0	0	0.48	0	0	0.14	0	0	0	0	0	0	0	0	0	0.18	0.18	0.05	0	0	0	0.19	0.04	0.44	0	1.13	0.39	1.64	0.13
cds605	1	0.37	0	0	0.75	0	0.11	0.89	0.1	0.57	0	0	0.86	0.24	0	0	0	0.06	0	0.62	0	0.62	2.18	0	0.03	0.87	0.06	0	0	0	1.98	0.75	0	0.8	0.84	0.68	1.68	0.81	0.5	0.41	0	0.88	2.72	3	0.68	0.18	0.39	1.48	0.74
cds606	0	0	0	0	0.66	0	0	0	0	0	0	0	0	0	0	0	0	0	0	0.77	0	0	0	0	0	0	0	0.66	0	0	0	0	0	0.28	0.14	0	0	0	0.38	0	0.2	0.15	0	0	0	0	0	0	0
cds607	0.44	0.37	1.58	0	0.66	0.22	1	0.64	0.16	0	2.13	0	1.62	1.58	0.48	0	0	0.15	0.32	0.5	4.28	0.01	3.52	1.37	3.18	3.3	1.92	1.52	0.08	0	0.77	0	0.09	0	0.61	0	0.74	0.48	3.99	1.22	0.29	2.34	1.91	3.14	4.6	0	0.57	5.04	1
cds608	1.03	3	2.7	0	2.79	0.81	0.57	1.99	1.79	2.5	3.18	0	1.91	2.8	3.29	2.07	3.03	1.2	2.2	1.61	4.6	6.57	5.29	2.78	6.6	3.36	5.71	3.1	3.63	2.57	3.32	1.15	3.94	1.06	2.64	2.1	7.14	7.46	3.4	2.29	2.22	1.07	4.07	6.4	4.02	1.46	1.57	6.58	4.06
cds609	60.11	48.58	68.04	23.62	92.78	61.76	59.16	18	123.44	87.86	116.85	14.39	186.68	154.84	45.82	63.31	31.47	23.55	107.86	87.51	155.81	102.83	233.4	69.44	181.57	90.65	150.3	107.52	92.78	33.74	102.68	56.22	222.69	82.17	104.71	88.51	233.56	143.75	164.69	121.95	86.76	190.25	188.94	287.49	191.8	208.1	130.22	382.43	132.87
cds61	72.29	72.82	99.77	49.27	166.2	125.92	94.08	44.02	161.12	128.23	206.05	14.14	119.75	81.03	51.93	39.46	42.42	29.02	123.85	89.29	138.95	103.2	181.25	75.92	141.36	107.25	132.37	75.03	76.75	30.2	76.92	37.67	155.38	62.45	96.73	72.36	233.66	108.12	204.21	141.41	107.01	197.13	220.77	341.7	265.58	211.25	114.84	403.49	161.89
cds610	121.25	107.25	115.31	54.75	213.43	115.13	137.6	31.91	165.93	181.13	241.2	19	177.72	160.73	59.46	67.85	65.62	63.14	136.61	112.74	147.57	76.77	224.83	87.17	218.78	136.6	136.03	126.01	99.63	51.72	97.47	54.69	181.61	62.68	107.71	103.59	295.06	147.78	259.21	113.93	110.16	177.75	205.84	351.59	305.54	255.81	157.34	461.25	165.53
cds611	152.73	108.47	141.17	71.59	240.73	169.03	198.72	40.95	214.4	197.95	258.19	20.19	200.4	186.84	93.79	85.98	108.95	64.96	182.86	124.97	196.82	150.08	334.49	114.59	271.64	159.69	216.24	144.4	140.58	74.96	135.51	98.88	296.99	119.29	152.76	138.28	388.25	225.57	292.05	188.38	199.31	320.3	231.98	489.08	307.76	321.64	204.82	562.54	241.4
cds612	17	30.35	38	21.05	60.39	46.24	37.03	18.5	49.77	36.92	47.54	4.96	38.66	20.94	23.58	12.83	16.1	8.48	35.71	24.55	37.65	37.56	97.34	13.34	47.42	38.44	56.62	20.27	35.64	14.89	32.11	14	47.83	17.36	33.04	15.82	79.73	45.44	81.89	52.72	43.41	71.49	71.71	137.43	95.14	94.8	66.57	198.83	65.85
cds613	139.61	123.36	164.04	81.03	275.28	203.18	208.88	71.35	268.29	195.29	283.4	23.05	206.46	173.91	80.31	65.73	95.21	61.21	188.92	116.48	212.05	160.04	292.69	84.02	273.48	146.2	213.49	128.2	139.61	58.85	118.37	69.76	257.25	83.8	132.14	124.44	307.82	176	316.02	151.91	135.53	227.82	246.99	412.4	246.8	296.38	169.44	526.01	163.16
cds614	165.05	166.36	208.01	91.7	272.93	208.73	194.67	98.45	258.91	264.5	317.87	52.48	246.54	199.51	83.07	79.65	120.94	75.07	188.29	132.39	236.28	178.57	369.74	138.34	282.14	169.95	242.79	159.96	171.44	86.25	148.82	93.98	322.02	137.56	172.89	162.16	430	264.97	397.22	211.01	179.34	264.94	308.97	568.06	438.74	355.9	252.77	754.94	248.26
cds615	350.91	265.51	303.69	158.65	451.16	318.62	379.56	103.02	536.12	383.02	486.84	58.89	421.07	342.03	186.21	152.8	215.77	124.7	342.46	237.57	417.9	281.26	702.54	253.65	540.58	356.06	400.21	232.33	274.19	128.7	264.28	129.77	499.83	206.09	269.95	219.71	661.27	347.35	633.34	260.33	232.87	366.3	488.78	816.94	606.74	491.38	338.09	969.49	291.49
cds616	84.3	62.76	63.58	58.95	145.75	148.92	94.33	35.26	106.47	114.97	117.56	13.39	76.42	59.84	32.78	37.79	53.88	34.14	56.12	54.48	91.91	77.25	153.07	51.26	114.89	83.46	82.51	62.72	67.2	19.84	47.34	22.12	95.85	28.19	52.55	48.32	112.44	62.82	135.47	39.24	53.3	83.06	124.18	221.68	164.59	90.37	72.2	173.4	50.24
cds617	134.11	127.64	111.67	88.07	269.41	237.96	125.63	79.82	165.66	186.53	167.64	42.53	125.6	140.22	64.71	54.44	72.7	48.18	105.55	119.27	145.1	149.86	241.56	86.82	185.97	147.23	155.12	103.02	97.83	31.46	77.62	48.89	183.17	69.74	82.97	98.62	216.47	126.75	199.06	80.88	95.99	164.39	257.58	323.38	231.73	209.98	134.64	320.91	124.97
cds618	315.94	287.09	368.72	224.21	632.86	517.61	382.71	150.91	510.87	428.8	558.31	61.26	416.98	315.72	167.91	125.64	201.14	108.28	313.2	220.22	374.31	360.66	627.55	196.12	447.14	303.37	402.32	255.5	268.88	116.49	224.76	132.55	501.05	169.73	265.03	245.29	612.81	333.38	553.84	257.14	239.93	447.92	583.54	945.72	589.97	548	334.23	927.61	283.47
cds619	822.34	604.81	799.48	465.64	1414.57	1158.62	1027.01	345.56	1316.38	1036.46	1342.5	129.23	1019.02	844.06	388.97	337.54	517.69	347.78	719.91	572.91	849.28	759.12	1341.2	436.54	1092.15	748.28	1031.83	476.68	650.9	316.05	564.65	317.66	1079.5	393.16	592.64	537.73	1406.37	779.36	1313.82	537.97	523.2	919.47	1136.77	1893.93	1188.56	1156.27	737.58	2178.32	581.28
cds62	21.33	16.62	27.53	14.46	32.3	23.14	29.93	6.34	31.31	25.43	41.36	5	24.8	19.01	7.56	10.55	12.62	11.84	22.84	22.39	20.62	27.27	51.63	19.28	28.53	28.11	22.93	19.7	8.31	9.55	13.18	6.57	40.04	18.46	19.63	17.54	46.31	32.28	37.79	27.61	13.62	29.08	32.79	49.31	48.7	41.27	25.79	82.6	32.6
cds620	328.85	230.85	250.11	112.41	451.01	373.95	351.32	93.44	488.94	395.45	501	53.91	410.73	327.51	183.05	122.76	229.6	112.08	278.51	164.23	267.02	235.16	507.51	164.37	359.11	250.71	342.78	178.24	249.46	89.01	218.04	130.31	371.7	149.35	202.7	187.5	636.81	273.66	449.42	233.44	190.21	359.81	347.18	623.53	460.63	450.58	265.64	919.82	282.54
cds621	283.27	223.05	258.43	111.24	410.58	291.02	295.44	97.36	433.94	379.24	425.88	53.65	363.28	352.1	160.12	134.59	174.01	134.21	243.37	205.58	298.56	215	498.52	189.14	370.66	275.97	370.44	203.74	251.27	97.19	208.87	134.06	390.83	146.61	195.27	215.59	545	322.71	532.76	249.28	213.33	316.64	455.89	739.37	557.77	446	298.95	914.23	259.44
cds622	144.22	116.15	156.74	81.96	237.23	158.24	166.87	41.24	209.01	199.17	191.56	34.34	171.38	156.3	75.09	45.42	82.46	57.8	123.86	129.9	126.44	164.4	246.31	89.48	202.78	125.33	162.7	93.98	91.95	39.19	91.44	48.46	200.17	70.82	89.69	81.34	198.84	122.52	220.59	106.47	107.79	183.26	268.27	315.44	253.97	178.03	130.62	328.58	129.09
cds623	274.26	222.14	261.21	141.08	464.1	363.54	308.3	108.74	352.78	345.75	381.75	53.71	309.68	299.2	119.31	105.66	170.41	102.96	213.97	147.58	317.84	229.46	489.48	196.15	366.36	259.01	298.7	193.21	225.13	92.78	199.42	99.58	402.72	132.8	178.65	176.96	459.77	296.22	431.4	211.67	205.35	342.59	412.37	657.18	437.36	351.38	250.8	685.85	224.27
cds624	222.2	208.58	245.67	95.68	318.79	251.74	237.56	70.29	356.13	298.71	392.48	43.41	247.12	228.35	112.96	84.21	146.21	76.8	212.11	147.76	259.17	142.44	364.11	140.84	294.92	180.37	300.16	155.16	205.97	72.87	199.53	83.04	358.21	114.13	214.26	175.37	419.37	253.04	423.81	169.88	143.42	255.14	343.17	519.36	461.94	376.93	219.26	684.74	192.81
cds625	208.25	148.96	182.46	83.74	263.09	226.52	226.69	64.61	277.47	256.84	323.78	37.4	255.17	208.26	98.24	87.71	126.65	73.99	183.57	61.02	203.09	93.22	391.77	92.68	280.94	204.25	260.18	153.73	146.61	62.14	181.2	96.65	285.16	121.72	166.88	162.92	378.96	258.59	368.71	118.87	105.29	129.62	205.13	465.49	305.22	319.35	224.04	654.4	167.2
cds626	139.81	107.05	127.96	70.34	229.7	180.16	157.84	45.08	172.88	172.89	232.67	25.05	146.52	153.13	66.86	62.38	80.48	49.06	127.7	81.27	170.04	89.25	219.54	95.13	184.46	122.49	173.09	106.26	96.99	46.47	100.99	55.39	170.74	78.16	110.5	118.33	243.73	148.43	252.37	80.65	74.14	136.5	215.97	375.58	278.77	212.3	144.03	402.2	102.38
cds627	214.08	172.7	214.98	136.21	354.21	265.62	237.96	74.5	320.61	285.36	368.19	46.96	263.35	250.44	118.81	87.41	128.69	67.12	206.16	122.17	215.04	163.8	449.44	126.14	305.52	212.1	272.71	128.9	200.92	73.89	175.35	90.65	316.27	115.38	181.49	157.36	477.93	230.98	331.76	170.39	154.66	240.6	321.34	505.72	378.79	393.87	247.25	704.07	183.98
cds628	234.2	201.13	238.58	142.47	486.63	368.11	280.09	80.65	358.93	309.35	381.09	39	268.88	292.19	109.36	113.02	141.01	103.28	199.46	148.6	274.77	199.38	433.92	147.94	339.48	271.74	317.14	167.37	192.96	92.5	202.8	121.98	361.28	154.35	193.58	194.23	445.56	270.11	426.17	169.3	154.92	256.32	370.04	658.64	496.74	421.29	246.69	724.19	242.1
cds629	125.38	127.28	185.21	92.22	278.89	282.47	163.09	72.94	235.18	201.03	220.65	19.66	191.58	182.26	72.74	73.56	69.81	72.42	144.88	123.1	161.14	175.39	261.64	76.49	203.44	169.86	190.93	127.43	146.91	53.86	99.09	71.76	233.5	92.34	114.82	105.21	280.95	180.75	280.02	119.48	128.14	237.38	349.4	477.87	358.66	237.08	149.71	426.16	137.88
cds63	2.53	1.52	2.95	0.97	4.67	0.22	2.9	3.25	0.28	1.53	1.8	0	1.9	0.65	0.11	0.26	0.28	0.04	2	2.4	3.03	3.01	2.24	1.56	2.74	3.48	2.18	0.35	0.6	0.29	0.18	0.33	4.12	1.12	0.91	0.72	0.79	1.41	3.15	1.26	1.68	1.46	2.34	4.61	3.7	0.5	1.01	4.18	1.39
cds630	293.97	244.86	279.84	171.16	551.65	441.9	328.26	124.28	475.45	393.09	467.52	34.07	394.27	285.37	137.46	125.22	177.41	114	291.25	195.7	346.46	302.49	506.96	154.59	414.46	281.11	367.21	192.85	223.35	80.1	240.16	111.63	420.83	165.3	211.07	188.78	553.02	311.74	541.06	183.79	219.11	375.28	486.79	825.35	535.27	505.66	293.43	849.03	234.25
cds631	247.92	209.06	303.56	144.08	526.44	389.05	363.35	101.05	469.97	362.47	498.86	42.69	381.84	263.94	126.06	105.8	170.75	104.45	242.84	197.36	287.15	236.88	509.41	168.12	414.36	276.41	324.42	209.05	213.19	101.4	202.03	115.22	399.77	141.63	223.03	191.67	574.84	311.13	475.2	228.88	218.36	306.13	433.13	730.08	509.31	459.66	282.45	800.45	244.26
cds632	227.96	210.53	223.61	120.34	359.47	347.45	286.53	99.06	359.01	363.66	382.41	35.87	289.39	254.06	121.36	118.65	136.75	82.53	196.85	154.73	259.46	181.32	398.81	145.76	345.49	235.33	281.17	155.46	193.38	70.31	181	110.66	328.66	128.31	194.29	185.59	462.3	237.8	401.54	162.45	161.57	231.68	356.81	574.73	414.57	339.74	241.47	678.04	215.67
cds633	107.52	88.35	131.89	43.66	174.27	110.05	125.35	44.13	211.59	145.8	185.97	16.18	135.5	100.14	60.74	48.93	77.32	41.01	104.36	76.24	123.96	95.14	164.62	73.41	189.3	95.22	128.16	79.37	97.8	43.13	91.14	48.86	160.4	55.3	84.89	68.82	228.31	120.19	164.56	89.39	76.33	138.7	206.01	262.7	262.89	179.61	115.87	311.6	107.21
cds634	98.16	74.74	119.59	35.61	155.52	93.88	116.91	45.62	179.46	128.15	157.37	20.53	117.6	89.08	58.92	42.8	55.89	30.87	88.13	72.93	112.7	61.32	191.7	53.56	123.35	71.04	113.77	60.34	94.51	29.93	77.16	38.44	132.25	29.51	72.38	56.86	188.28	96.97	136.32	73.1	77.64	112.4	138.67	230.99	194.46	161.48	97.64	272.13	78.2
cds635	266.24	216.76	282.52	140.6	364.78	287.78	354.32	76.08	480.63	327.2	483.22	46.38	366.73	269.44	150.28	97.49	190.29	93.03	270.77	192.58	283.22	197.6	458.17	171.95	360.86	234.71	310.03	200.64	221.51	92.52	244.48	98.51	374.62	125.6	196.54	180.12	526.95	273.28	434.43	207.82	190.91	301.02	352.99	641.82	453.71	435.42	244.9	868.46	239.63
cds636	325.81	240.96	335.5	135.4	512.46	384.83	436.51	100.91	571.01	413.61	497.08	52.58	410.72	293.53	185.33	125.18	215.58	104.14	286.83	195.08	348.67	202.18	553.56	221.11	471.11	288.99	336.76	202.42	241.78	114.54	279.49	123.21	446.43	137.69	237.08	229.9	629.59	321.92	469.41	208.13	186.22	232.43	476.19	718.22	617.77	484.79	295.51	874.41	263.38
cds637	128.61	106.91	145.36	69.15	216.57	182.16	168.07	77.48	210.48	184.07	206.89	29	154.25	138.42	66.76	44.99	88.3	54.53	107.36	101.07	146.25	136.74	231.13	81.13	177.12	131.81	144.25	107.86	103.52	53.71	91.41	50.89	169.71	63.54	95.55	88.54	235.4	129.8	213.58	94.14	75.58	126.81	214.04	327.46	265.39	206.02	101.41	332.96	107.37
cds638	210.81	162.55	202.14	106.86	312.7	272.67	225.38	73.84	320.21	268.97	320.44	35.69	282.52	203.69	127.94	78.04	134.82	75.55	163.02	135.65	215.01	189.9	363.11	105.27	278.39	158.16	203.49	123.19	144.19	66.09	151.57	61.92	259.2	93.33	134.27	115.55	341.17	186.4	312.1	130.8	136.42	259.34	273.34	470.18	360.98	294.97	187.33	558.3	142.11
cds639	546.92	442.57	485.69	249.3	708.07	657	661.06	217.48	795.51	712.62	884.17	91.13	703.88	575.51	260.75	235.84	353.14	199.35	511.85	330.71	587.79	484.83	945.78	376.97	773.59	531.11	659.25	382.69	435.15	196.44	387.35	233.2	754.86	296.33	400.85	335.83	1075.54	600.87	821.43	426.31	378.98	630.3	659.99	1207.84	743.7	897.62	596.48	1578.99	447.83
cds64	31	17.5	20.5	1	53.68	11.5	31.81	5	28.43	30.34	54.39	1	67.66	37.37	19.53	15.44	14	9.84	49.92	11.5	49.84	28.5	66.97	31.43	66.43	30.14	53.99	26	36.09	14.86	43.42	14.81	71.46	18.63	39.5	30.34	69.43	39.96	57.26	42.01	33.37	56.14	62.12	82.66	82.61	60.38	33.75	115.13	43.07
cds640	81.99	73.45	80.86	42.56	151.62	128.49	96.62	27.62	120.29	122.42	111.61	12.92	93.95	88.42	34.43	42.32	48.36	43.08	81.22	50.65	105.86	37.63	137.77	54.22	106.66	94.08	128.06	68.66	74.47	38.02	60.84	40.73	104.22	52.77	70.41	80.16	156.28	93.35	120.78	54.87	48.11	74.24	150.61	233.6	183.4	105.6	76.49	178.34	76.17
cds641	278.28	210.46	237.54	172.58	445.01	371.04	284.84	121.83	370.78	342.83	364.31	55.86	289.98	248.07	115.97	100.24	165.1	134.02	240.5	142.75	281.45	228.53	431.86	136.28	338.67	214.16	258.05	167.37	184.56	93.47	134.57	92.85	306.84	133.14	174.06	176.53	421.19	230.04	375.95	120.18	135.71	261.12	352.11	561.2	349.84	332.72	247.69	608.45	170.2
cds642	423.57	348.97	452.6	205.3	743.03	543.38	484.14	153.03	626.2	542.32	622.21	77.98	526.74	462.27	222.41	206.53	242.28	192.96	398.05	349.44	420.77	463.97	708	262.5	577.88	435.53	465.99	290.91	308.26	165.89	245.41	150.19	565.2	255.54	294.86	299.13	724.72	444.64	744.77	334.04	350.1	598.3	657.27	1032.59	796.8	629.17	456.53	1130.21	422.83
cds643	183.47	134.78	192.94	90.81	295.54	217.67	194.89	50.05	250.55	261.3	280.47	22.85	176.09	186.13	71.29	76.51	98.72	65.58	163.09	112.02	193.34	121.88	302.06	107.22	229.01	149.77	197.66	90.75	144.08	47.75	99.65	67.8	222.03	79.7	133.03	123.19	277.08	174.52	277.81	119.44	117.32	151.76	257.91	416.11	301.26	266.47	177.18	436.76	156.21
cds644	149.07	120.9	174.43	67.47	204.53	140.36	186.45	53.5	202.41	192.56	292.98	21.64	222.49	200.75	104.23	81.41	90.42	71.07	156.62	74.47	228.53	90.93	292.9	108.66	212.14	140.78	170.95	101.73	128.32	71.15	129.69	84.23	222.75	92.88	113.11	113.97	317.03	213.12	225.62	116.27	108.65	136.36	176.54	326.32	252.63	219.2	180.08	415.94	152.82
cds645	83.85	58.57	75.66	27.27	158.88	93.5	111.08	30.89	126.31	106.99	124.33	16.4	92.39	87.14	38.44	41.74	49.83	32.82	85.44	63.12	93.51	64.29	172.2	54.37	129.7	86.93	109.93	61.72	62.58	17.5	72.18	32.09	137.51	37.34	59.75	51.69	170.59	101.85	140.76	79.38	80.5	171.63	141.14	231.74	147.02	132.03	83.77	234.39	93.79
cds646	229.58	198.66	257.53	127.27	374.19	282.4	235.86	77.32	358.86	317.73	436.8	34.36	298.83	264.3	133.69	103.33	106.3	92.07	290.01	219.45	326.7	297.89	500.96	157.07	375.51	267.89	381.12	239.88	252.72	125.6	184.88	142.91	377.82	160.15	205.14	236.46	560.02	397.18	557.33	333.4	299.26	583.01	480.21	915.86	670.32	537.41	343.89	999.52	415.1
cds647	129.47	99.79	125.91	46.02	202.37	120.31	158.56	37.63	154.68	161.04	147.18	7.39	118.7	90.4	38.35	34.9	49.69	39.73	125.24	109.65	177.11	155.45	248.26	90.6	225.53	126.46	151.78	105.48	87.57	43.49	92.14	49.87	165.91	55.99	95.01	77.1	225.47	132.52	218.11	95.97	99.67	155.19	282.48	335.17	309.62	230.16	147.5	355.2	121.1
cds648	15.76	16.81	31.85	11.4	27.24	30.9	22.35	18.33	37.48	23.92	34.93	3.88	32.66	26.95	8	5	5	6.4	23.94	15.9	38.12	24.31	52.96	24.41	40.79	31.26	28.41	24.4	20.31	12.55	31.03	11.96	50.7	16.7	21.62	15.48	81.36	33.07	50.28	21.9	14.45	23.09	32.58	64.53	59.35	50.38	26.69	100.51	23.45
cds649	229.19	177.55	232.11	74.34	487	298.24	299.74	42.76	388.17	291.93	441.66	38.9	352.41	240.71	113.81	80.09	118.26	77.51	191.18	196.1	275.6	219.45	412.08	166.03	367.86	215.53	266.09	175.14	183.79	82.75	180.45	92.02	323.62	108.24	165.87	147.41	409.91	249.35	398.65	231.75	226.84	366.08	434	622.31	549.8	363.1	223.54	651.11	254.44
cds65	5.58	10.94	15.44	2	25.66	18.02	16.17	12.84	24.99	15.34	8.24	2	14.61	11.38	1.26	6.67	1.53	3.95	11.82	10	10.82	10.4	24.37	7.23	20.2	13.24	12.84	6.24	9.57	2.88	13.2	4.88	14.22	9.21	11.81	14.44	14.07	12.57	15.56	11.96	4.81	21.61	25.51	35.75	32.25	21.6	13.9	25.51	14.76
cds650	476.92	327.46	390.43	234.28	670.73	515.59	579.34	159.06	632.88	567.34	779.34	81.64	599.19	564.17	254.5	214.08	317.93	176.35	445.17	364.45	561.36	438.89	852.92	283.05	605.39	440.72	612.65	315.49	431.1	178.37	341.02	205.17	695.29	233.34	377.24	330.43	947.42	514.83	800.51	394.16	332.74	696.58	618.76	1193	789.68	754.69	506.3	1501.33	454.25
cds651	62.44	43.32	43.88	17.87	116.81	70.19	68.58	19.95	87.58	66.68	86.53	5	67.35	62.77	32.39	32.2	48.77	26.32	40.86	36.22	58.93	50	86.68	27.69	66.31	37.82	65.31	31.78	41.61	21.61	42.85	28.34	84.23	25.86	47.18	51.18	106.6	51.23	96.24	59.72	52.61	96.16	85.83	161.09	101.8	97.68	46.59	182.06	56.72
cds652	0	0	0	0	0	0	0	0	0.1	0.07	0	0	0.04	0	0	0	0	0	0.34	0	0.11	0	0.18	0	0	0.18	0	0.06	0	0	0	0.26	0	0	0	0.12	0	0.16	1	0	0	0	0.07	2.31	0.08	0	0.07	0	0.11
cds653	1.86	0.64	2.19	1.12	2.99	3.52	2.06	0.38	2.76	4.94	2.92	0.52	3.68	5.42	1.16	0.93	0.85	1.6	3.61	2.87	5.66	3.28	6.03	2.09	4.44	2.62	4.07	2.37	1	3.1	0.04	2.13	4.73	3.26	2.28	3.2	8.39	6.87	8.8	4	3.84	4.96	10.95	9.69	6.85	4.32	7.28	10.37	4.24
cds654	55.8	34.04	48.4	33.7	98.06	74.05	60.32	8.57	91.55	76.89	92.92	7.45	63.05	70.27	27.02	18.15	22.22	20.78	62.42	46.06	99.04	60.22	151.71	33.93	96.44	59.28	79.82	38.59	44.41	21.76	51.07	35.05	82.79	36.49	55.49	56.86	174.24	99.32	138.47	71.22	60.15	116.93	129.6	180.53	134.78	138.46	82.83	221.27	82.7
cds655	204.56	118.51	178.7	85.25	312.8	227.08	199	61	255.41	234.79	263.67	23.67	205.93	168.14	77.46	64.58	110.87	62.43	170.24	127.25	183.96	188.47	299.76	148.61	251.52	139.76	185.85	120.88	107.55	65.14	110.43	69.04	252.18	98.26	124.58	140.14	296.1	167.57	283	164.01	126.99	232.52	258.93	430.78	311.42	241.48	181.53	394.88	176.81
cds656	4	0	2	1	6.65	1	4	3.52	3	3	8	0	7.06	5	0	2	1	1	3.5	5	13.72	5	22.08	5.91	9.92	8	11	6	4	2.71	9	5.5	12	3	6.78	14.12	27.7	13.09	29.31	18.64	15.26	27.76	25.99	51.7	41.18	26.22	18.75	105.07	40.79
cds657	0.67	0	0	0	2.23	0	0.83	0.81	1	0	0	0	0	0	0	0	0	0	0	0	1	0	1.16	0	1.09	0.01	1	0	0	0.57	0	0	0	0.66	1.9	0.2	1.41	0.7	3.3	0.84	0.9	5.42	4.46	3.46	4.14	3.35	2.5	4.55	8.36
cds658	4.96	1.38	6.9	2	1.32	5	2.61	4	4.65	2.15	3.78	1	4.95	0	0	0	0	0	2.65	1	6.05	3.8	4.17	1	3.07	7	5.96	3	2.91	0	1.34	1	4.48	0.05	1	0.94	13.37	2.98	2.46	4.99	2.79	0.5	3.5	8.12	9.35	5.07	1.46	9.65	4
cds659	45.42	24.99	36.99	20	73.79	39.9	53.92	7	66.12	34.33	57.04	5	62.55	44.67	15.61	12.89	16	16	31.52	30.39	34.46	34.98	85.8	34	59.58	33.99	39.34	26.07	26.16	12.5	33.48	11.83	41.5	14.28	29.99	21.48	68.36	34.33	62.38	30	24	51.65	53.56	88.31	67.79	58.78	28.48	120.74	30.98
cds66	16.44	8.87	11.67	0	20.91	6.67	8.73	6.94	14.56	16.44	19.15	0	9.17	17.57	2.77	1.85	7.45	2.79	10.45	8.68	19.75	13.51	35.21	10.01	19.68	11.02	22.68	13.01	13.35	3.52	14.49	11.14	25.47	9.13	8.18	14.82	40.44	19.42	28.02	19.94	21.19	33.84	24.42	58.39	40.39	26.75	24.37	57.44	17.98
cds660	15.48	9.63	14.92	6	40.71	15.69	26.37	3.15	30.34	22.74	28.51	6.31	17.6	14.97	3	13.2	14.97	4	25.3	16.43	17.97	20.59	33.91	12.9	36.97	19.77	19.74	13.9	14.63	9.8	14.5	3.63	24.39	3.99	14.04	14.83	24.49	24.97	33.42	26	16.37	22.89	15.92	45.93	28.61	28.28	19.49	56.38	13.42
cds661	31.36	22.03	36.19	20.53	36.99	17.57	28.92	4.93	37.84	28.35	25.63	0.43	32.38	27.65	7.64	6.75	15.76	6.02	29.24	24.09	34.86	27	61.24	13.99	47.9	22.25	37.67	28.62	17.06	12.73	33.35	14.38	42.59	13.29	19.5	17.63	63.72	29.86	55.14	17.39	24.31	28.75	50.34	61.79	61.96	53.41	28.74	80.12	29.35
cds662	302.98	238.89	313.5	155.35	549.36	351.06	354.13	127.63	389.5	353.48	380.15	48.92	326.91	244.95	163.28	116.14	200.51	160.17	250.05	190.47	309.51	333.82	538.46	177.44	398.62	297.82	337.53	200.86	229.52	99.01	164.36	113.42	348.92	146.86	196.99	187.29	483.22	287.54	488.52	209.7	205.02	361.51	365.59	725.33	441.32	420.87	283.4	660.56	238.37
cds663	47.51	26.75	53	22.8	97.61	44.4	60.63	5.28	57.02	62.42	57.77	4.65	60.04	51.37	27.57	14.09	29.61	25.23	43.66	36.19	50.3	53.14	75.45	30.78	73.93	43.6	53.88	34.7	38.37	14.86	28.45	12.87	73.6	31.2	33.84	33.46	101.95	64.8	80.63	44.78	30	75.28	80.14	154.27	97.47	89.72	54.56	145.01	43.53
cds664	51.47	43.37	65.94	39.29	101.49	76.05	59.33	7.21	98.29	65.98	107.39	5.96	95.07	65.89	39.28	34.51	48.2	14.94	68.35	51.58	87.65	73.15	148.17	44.47	128.97	66.88	84.98	50.64	76.63	15.63	72.42	45.12	133.45	51.2	61.51	50.82	153.45	75.62	121.74	58.23	51.09	83.9	76.49	161.12	112.73	129.32	64.43	255.91	63.13
cds665	139.76	101.28	129.46	71.86	187.37	143.77	135.2	52.17	198.23	191.52	240.35	37.92	230.84	200	140.71	131.33	81.99	41.17	250.12	134.69	380.59	201.75	512.12	104.4	325.14	216.96	303.87	177.25	196.08	82.48	250.86	150.62	530.64	229.84	201.47	198.23	450.54	299.45	421.22	240.6	225.34	398.22	380.45	686.04	418.72	540.35	276.4	1050.35	393.53
cds666	83.71	49.84	74.77	24.5	88.81	40.65	74.62	18.31	95.11	66.46	100.77	7.58	95.5	74.6	19.68	21.84	20.05	12.76	71.36	65.71	105.83	61.19	193.3	39.22	140.35	77.6	99.75	68.41	53.76	36.1	63.65	41.33	128.61	47.59	68.96	54	203.71	106.73	166.9	91.23	64.9	148.91	133.1	267.6	217.69	154.23	94.73	288.59	126.72
cds667	41.68	19.65	21.7	2	37.62	28.29	38.5	5.69	56.38	41.99	57.33	5.42	36.41	24.4	13.81	14.45	13.94	6.71	30.3	23.72	54.04	27.91	66.07	18.54	54.45	32.23	44.19	19.62	29.32	11.67	34.43	10.93	48.49	23.51	21.87	26.11	71.23	39.17	51.18	24.74	16.64	43.94	46.38	78.77	56.04	64.94	28.32	107.99	32.67
cds668	28	10.92	35.23	13	40.73	24.08	45.32	15.5	49.97	27.79	60.73	1.97	41.7	14.01	11.76	10.79	12.49	8.47	46.21	32	55.54	28.15	68.46	24.23	66.44	32.47	42.16	18.37	29.25	11.59	31.9	12.53	58.77	15.46	33.66	24.46	107.1	36.56	87.49	39.78	37.67	57.65	72.01	122.99	73.61	89.7	33.56	142.37	60.51
cds669	17.37	15.01	28.54	12.9	24.58	15.17	19.81	6.61	30.51	31.04	24.25	0.53	22.29	13.99	12.76	4.65	13.1	10.37	28.22	19.65	38.8	30.06	51.94	16.55	39.5	22.07	36.19	18.1	20.16	9.76	18.65	15.67	35.5	11.39	15.3	22.95	62.62	21.4	58.45	34.62	30.08	70.13	43.13	92.67	65.74	38.13	28.66	109	37.2
cds67	1	0.84	0	0	2	1	0.04	0	2.93	0.74	3	0	1	0.08	0.34	0.68	0	0.3	0	0	0.08	3.87	1.23	0.53	1.5	0.38	1.91	0	0	0	2.68	0	2	0.63	1	0	0	3.8	0.99	0	0.14	0.01	1.87	0.5	5.08	4.21	2.31	2.04	2.12
cds670	119.61	72.63	137.04	63.35	161.73	120.83	120.42	36.01	171.37	182.62	228.48	22.95	126.87	136.37	55.54	43.22	63.92	36.18	150.85	130.6	170.5	112.67	267.57	77.65	209.86	117.22	212.74	119.08	112.02	53.05	120.57	54.28	209.38	70.5	119.87	126.04	262.77	162.79	266.16	163.74	135.14	308.07	299.47	434.63	352.36	255.84	146.02	471.65	206.75
cds671	13.29	7.04	9.49	3	21.37	4	16.19	0	16.49	11.03	17.97	0.5	11.58	7.69	5.8	1	4.49	5.28	8.85	7.2	17.37	9.25	22.7	8.78	15.41	13.87	13.5	6.57	8.89	0	4.5	4.02	15.74	4.37	4.34	11	18.77	8.5	18.31	16.65	6.98	10.26	19.6	21.5	20.63	14	11.23	32.32	6.5
cds672	13.2	9.43	11.28	6.46	18.48	7.38	10.78	1.96	21.8	11.08	21.27	1.21	25.46	19.69	9.98	8.4	2.76	2.82	23.45	13.73	19.81	18.4	42.05	6.55	22.14	16.69	19.55	18.66	21.12	4.81	15.33	7.51	36.7	7.1	23.22	19.15	32	21.53	26.6	19.83	18.97	34.11	25.37	54.94	44.79	46.26	26.62	68.73	24.84
cds673	59.66	36.73	68.15	16.35	93.06	58.42	77.71	11.76	81.19	69.94	98.71	10.57	116.28	85.77	48.42	45.13	27.42	19.4	93.19	66.33	123.55	106.97	196.85	48.91	122.64	80.01	119.55	60.84	72.02	39.04	76.93	44.94	150.27	42.97	77.83	55.52	148.41	103.2	161.63	87.44	63.86	151.26	135.66	329	186.79	150.27	95.1	337.7	137.63
cds674	9.51	5.04	6.6	1	12.54	19.12	9.79	6.98	8.33	10.41	19.21	0	9.8	6.65	4	3.5	4	1.82	8.21	9.57	11.4	14.04	21.47	9.18	16.34	10.47	10.77	10.35	11.88	2.39	12.5	6	15.22	10.15	8.17	7.3	16.77	11.25	13.75	7	8.9	17.12	18.15	28.36	28.36	16.58	11.32	37.61	11.38
cds675	0	0	0	0	0	0	0.1	0	0	0.86	0	0	1	0	0	0	0	0	0	0	0	0	0	0	0	0	0	0	0	0	1	0	3	0	0	0	0.15	0	0	0	0	0	0	2	0	0	0	0	1.28
cds676	0.12	0.1	0.62	0.12	2.33	0	2.18	0	0	0.17	0	0	0.42	0.21	0	0.67	0.1	0	1.75	0.25	0	0.25	2.83	0	5.28	0	0.28	1.89	0	0	0	0	2.97	0	1.15	3.54	1.53	0.95	1.9	1.9	1.93	2.65	5.07	2.05	1.94	1.43	2.44	3.97	0.65
cds677	22.59	19.57	29.14	22.63	42.02	23.5	28.13	9.48	42.87	31.32	35.75	0.4	31.64	34.77	9.89	17.05	10.56	5.28	32.41	17	34.28	26.25	53.39	18.75	49.41	28.54	33.94	24.01	18.88	7.08	24.78	6.88	63.7	14.92	27.7	17.08	69.85	31.38	40.6	23.71	30.39	50.16	58.69	96.63	66.78	77.71	44.56	118.23	29.96
cds678	37.49	30.55	32.29	12.07	64.04	44.33	49.02	7.47	40.85	44.4	38.02	7.23	33.83	27.17	13.29	15	15.45	14.6	29.11	38.91	48.92	42.75	56.26	23.64	65.78	45.45	29.68	31.91	27.52	20.05	20.96	12.47	51.29	20.27	25.04	19.96	68.37	34.44	60.04	26.89	28.67	46.54	67.95	84.73	100.21	40.34	32.94	102.64	34.47
cds679	10.87	6.8	8.62	6.36	2.08	4.35	5.5	5	10.32	6.93	8.7	1	11.5	3	2	2	0	0	5	3.5	7.91	3.93	8.64	4	7	5	7	7	2	7	2.5	1	11	5	5.39	6	9	3.93	7.03	9.4	3.89	13.9	11	16.97	16.82	14.2	4.23	21.25	10.5
cds68	17.45	16.1	15.48	4.99	37.3	34.79	21.53	2.68	14.9	19.71	24.97	0.5	11.62	10.96	5.05	3.02	5.06	2.86	11.14	6.68	28.51	19.07	19.9	4.49	21.62	13.41	16.9	7.16	13.06	1	9.8	6.75	20.12	6.22	18.13	17.75	21.62	13.34	23.08	13.12	6.5	18.99	31.58	46.8	38.5	27.26	18.14	44.01	20.68
cds680	1225.01	845.95	1086.91	497.69	1061.9	735.82	1266.53	439.61	1879.46	1435.58	2632.15	228.31	1761.45	1473.01	650.42	517.01	867.61	506.63	1269.77	946.63	1475.52	1192.49	2388.26	764.96	1901.76	1188.48	2179.46	1193.14	1494.2	730.5	1366.27	822.46	2482.51	944.5	1255.16	1211.12	2960.85	1875.07	2294.35	1694.99	1593.06	2491.17	1975.18	3878.17	2626.26	2793.28	1870.06	5349.16	1829.23
cds681	366.13	295.26	282.41	187.54	397.94	280.55	397.69	131.48	479.82	421.03	602.75	49.65	531.09	382.58	188.29	145.77	209.08	119.33	395.93	243.9	512.36	303.03	837.11	268.51	662.94	418.65	545.78	300.25	356.6	160.38	325.23	195.34	629.95	226.92	348.97	330.18	902.3	539.8	726.58	384.91	311.57	544.24	479.72	994.44	670.12	739.23	491.19	1445.96	431.09
cds682	29.69	32.03	27.04	18.2	58.07	33.87	43.46	9.13	37.69	38.35	32.52	4.09	30.86	23.82	13.56	9.48	15.28	8.35	37.93	26.69	33.33	27.03	56.07	22.3	48.69	33.45	31.72	21.04	22.71	11.82	23.18	13.36	48.91	17.99	29.27	16.15	49.89	30.54	42.53	22.01	23.28	34.23	40.24	64.5	55.5	37.06	30.29	84.62	26.82
cds683	32.82	32.79	24.31	21.15	87.57	51.05	59.13	8.33	54.34	37.73	33.15	3.23	29.32	18.25	11.92	10.32	14.41	11.08	33.99	26.43	35.43	35.83	61.07	17.38	32.22	24.94	32.43	18.99	22.92	9.79	11	11.22	43.43	19.27	19.08	18.47	44.06	29.8	42.41	26.73	28.93	37.36	32.18	73.71	49.2	32.14	23.51	61.1	24.22
cds684	15.46	12.38	13.69	6.03	39.39	25.37	17.03	10.32	16.16	19.97	15.89	1.48	12.89	7.56	3.25	5.35	4.2	1.94	13.76	14.13	14.73	10.26	19.29	11.88	18.72	14.68	4.69	3.25	9.34	3.8	4.76	5.15	22.05	6.97	9.46	7.35	20.7	10.39	16.09	12.7	8.03	20.65	16.42	25.61	24.9	13.91	9.87	17.08	7.14
cds685	99.69	85.91	98.96	39.79	138.03	97.19	101.99	38.06	123.04	88.91	107.59	14.83	124.75	89.66	28.78	26.67	27.63	12.95	96.42	71.47	149.2	119.89	241.95	66.39	177.14	100.3	161.46	92.18	112.69	32.82	80.5	53.79	152.92	52.16	95.62	67.47	223.81	154.12	220.05	132.7	136.29	289.02	220.71	363.16	247.78	212.32	134.81	372.46	182.61
cds686	45.68	42.37	50.67	26.09	77.18	60.35	64.04	30.77	66.87	70.02	54.35	7.73	53.95	39.32	19.91	14.46	27.35	8.78	35.72	46.1	60.16	59.56	85.98	30.15	82.95	48.44	62.42	34.01	26.53	19.02	31.73	24.46	81.76	32.1	42.77	38.33	85.9	71.42	105.35	30.08	51.6	93.9	96.1	123.66	104.42	82.08	56.12	162.94	64.35
cds687	90.73	65.21	84.24	55.13	179.98	145.01	114.22	37.1	150.05	127.26	147.44	27.06	125.52	102.75	48.52	43.38	67.2	49.83	93.64	95.71	122.47	116.42	207.85	77.73	167.79	92.5	115.15	69.67	80.89	26.86	65.52	37.14	149.71	42.87	80.93	84.26	192.62	95.58	187.89	68.29	83.72	152.2	143.74	278.7	159.94	156.96	103.72	276.73	112.18
cds688	56.35	36.4	43.87	17.53	88.3	57.05	52.59	13.28	67.74	60.27	72.9	9.45	59.49	64.44	31.16	18.38	34.45	22.47	53.85	45.18	58.54	80.91	99.39	43.54	83.23	71.55	54.62	43.92	47.05	21.43	31.35	13.61	71.84	20.11	40.43	41.01	83.65	59.75	76.33	43.01	51.22	80.29	101.14	145.23	97.48	80.62	49.42	149.19	69.81
cds689	101.91	92.73	108.52	55.2	177.96	127.57	150.31	34.43	146.9	126.33	156.64	19.25	156.84	117.83	42.51	31.65	62.99	26.92	144.19	118.88	172.42	152.31	272.06	83.67	218.85	107.56	152.27	93.76	101.11	42.7	99.82	69.23	228.19	78.78	103.16	82.29	276.08	150.57	220.39	124.83	100.32	241.12	195.9	369.26	247.1	211.14	145.25	427.92	137.23
cds69	35.61	23.23	26.79	13.53	49.47	42.04	30.97	5.64	37.8	43.97	50.81	12	54.6	30.64	18.12	15.16	7.38	6.96	47.7	31	80.83	34.92	78.38	34.73	68.41	40.17	42.88	42.67	37.18	9.83	42.67	14.92	58.81	25.34	35.54	25.69	86.95	45.98	61.02	35.85	33.54	45.02	53.84	85.11	80.78	64.78	50.96	133.73	60.84
cds690	198.63	150.96	191.4	86.01	264.81	189	248.29	66.82	431.35	350.52	514.51	50.31	546.92	383.01	118.16	94.06	99.57	73.31	292.69	211.38	344.62	283.19	647.74	164.58	414.53	296.71	485.14	238.84	290.65	98.85	272.63	145.4	517.26	194.5	273.13	209.95	644.39	374.73	505.12	302.45	262.71	492.22	421.09	767.93	515.29	616.62	396.64	1011.34	326.94
cds691	5.95	2.46	6.76	0	5.54	11	8.71	0	8.08	3	3	0.33	5.83	4.55	2	2	3	1.45	3.37	0	4.08	2	7	4	5	5.85	6.78	4	2	2	3.5	1	3.62	2	1	6.31	6.72	3	11.56	5.85	3.43	5.46	5.67	12.56	4.32	7.01	1.74	11.12	4.95
[truncated: 341 more rows]
[truncated: 6 more columns]

## Sheet: Grote et al., 2017
grote_wbm_L4_a	grote_wbm_L4_b	grote_wbm_30dpi_immaturemale_a	grote_wbm_30dpi_immaturemale_b	grote_wbm_30dpi_immaturefemale_a	grote_wbm_30dpi_immaturefemale_b	grote_wbm_42dpi_immaturemale_a	grote_wbm_42dpi_immaturemale_b	grote_wbm_42dpi_immaturefemale_a	grote_wbm_42dpi_immaturefemale_b	grote_wbm_120dpi_adultmale_a	grote_wbm_120dpi_adultmale_b	grote_wbm_120dpi_adultfemale_a	grote_wbm_120dpi_adultfemale_b
[truncated: 839 more rows]

[truncated: 1 more sheets: Chung et al., 2019]
